# Supplementary material for: “On-water” defluorinative cyclization of trifluoromethyl enones with phosphine oxides: synthesis of polysubstituted furans
Source: Royal Society of Chemistry journal article supplement (doi:10.1039/d4qo00659c), 2024-01-01

## Supporting Information

### “On-Water” Defluorinative Cyclization of Trifluoromethyl Enones with Phosphine Oxides: Synthesis of Polysubstituted Furans

Man-Hang Feng,<sup>a</sup> Shu-Ji Gao,<sup>a</sup> Xiao-Ying Li,<sup>a</sup> Mengtao Ma,<sup>b</sup> Zhi-Liang Shen,<sup>\*,a</sup> and Xue-Qiang Chu<sup>\*,a</sup>

<sup>a</sup> *Technical Institute of Fluorochemistry, Institute of Advanced Synthesis, School of Chemistry and Molecular Engineering, Nanjing Tech University, Nanjing 211816, China. E-mails: ias\_zlshen@njtech.edu.cn; xueqiangchu@njtech.edu.cn.*

<sup>b</sup> *Department of Chemistry and Materials Science, College of Science, Nanjing Forestry University, Nanjing 210037, China.*

### Table of Contents

|                                                                                                          |          |
|----------------------------------------------------------------------------------------------------------|----------|
| General information                                                                                      | Page S2  |
| General procedure for the synthesis of trifluoromethylated enones <b>1</b>                               | Page S2  |
| General procedure for the reaction of trifluoromethylated enones <b>1</b> with phosphine oxides <b>2</b> | Page S2  |
| Scale-up synthesis of product <b>3aa</b>                                                                 | Page S3  |
| Further transformations of product <b>3aa</b>                                                            | Page S3  |
| Mechanistic studies                                                                                      | Page S5  |
| Optimization of reaction conditions                                                                      | Page S7  |
| The X-ray crystal structure of products                                                                  | Page S7  |
| Characterization data for products                                                                       | Page S10 |
| References                                                                                               | Page S28 |
| <sup>1</sup> H, <sup>19</sup> F, <sup>31</sup> P, and <sup>13</sup> C NMR spectra of products            | Page S29 |

## General information

Unless otherwise stated, all reagents were purchased from commercial suppliers and used without further purification. Melting points were recorded on an electrothermal digital melting point apparatus.  $^1\text{H}$ ,  $^{19}\text{F}$ ,  $^{31}\text{P}$ , and  $^{13}\text{C}$  NMR spectra were recorded in  $\text{CDCl}_3$  on Bruker Avance or Joel 400 MHz spectrometers. NMR splitting patterns are designated as singlet (s), doublet (d), triplet (t), quartet (q), multiplet (m), doublet of doublets (dd), doublet of triplets (dt), doublet of quartets (dq), triplet of doublets (td), triplet of triplets (tt), quartet of doublets (qd), and doublet of doublet (ddd), *etc.* The chemical shifts ( $\delta$ ) are reported in ppm and coupling constants ( $J$ ) in Hz. High resolution mass spectrometry (HRMS) data were obtained on a Waters LC-TOF mass spectrometer (Xevo G2-XS QTof) using electrospray ionization (ESI) in positive or negative mode. Column chromatography was generally performed on silica gel (300-400 mesh) and reactions were monitored by thin layer chromatography (TLC) using UV light to visualize the course of the reactions.

## General procedure for the synthesis of trifluoromethylated enones **1**<sup>[1-2]</sup>

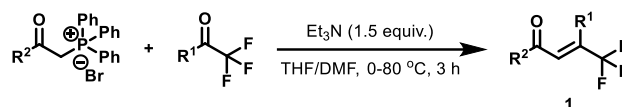

A solution of triphenylphosphonium salt (7.5 mmol, 1.5 equiv.) and triethylamine (758.9 mg, 7.5 mmol, 1.5 equiv.) in THF (20 mL) was added a solution of a trifluoromethyl ketone (5.0 mmol, 1 equiv.) in DMF (1.6 mL) at 0 °C (ice bath) under air. The mixture was stirred for 15 min at this temperature. After warming to room temperature, the solution was heated at 80 °C (oil bath) for 3 h. The solution was quenched with saturated aqueous  $\text{NH}_4\text{Cl}$  solution (30 mL) and extracted with ethyl acetate (50 mL x 3). The organic extract was dried over  $\text{MgSO}_4$  and concentrated under reduced pressure. The residue was purified by column chromatography on silica gel (petroleum ether/ethyl acetate: 100/1) to give the pure trifluoromethylated enones **1**.

## General procedure for the reaction of trifluoromethylated enones **1** with phosphine oxides **2**

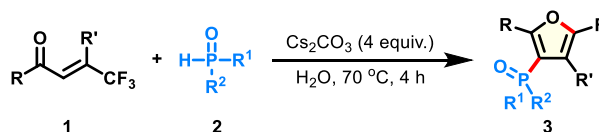

A solution of trifluoromethylated enone (0.3 mmol, 1 equiv., **1**), phosphine oxide (0.45 mmol, 1.5 equiv., **2**), and  $\text{Cs}_2\text{CO}_3$  (391.0 mg, 1.2 mmol, 4 equiv.) in  $\text{H}_2\text{O}$  (2 mL) was stirred at 70 °C (oil bath) for 4 h. The reaction was then quenched by saturated  $\text{NH}_4\text{Cl}$  solution (20 mL) and extracted with EtOAc (20 mL x 3). The combined organic layer was washed with saturated brine twice, dried over  $\text{MgSO}_4$ , and concentrated under reduced pressure. The crude product was purified by flash silica gel column chromatography (300-400 mesh) using petroleum ether/ethyl acetate (6/1~3/1) as eluent to afford the pure products **3**.

## Scale-up synthesis of product 3aa

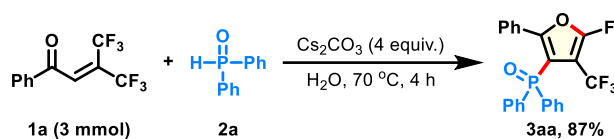

A solution of 4,4,4-trifluoro-1-phenyl-3-(trifluoromethyl)but-2-en-1-one (804.1 mg, 3 mmol, 1 equiv., **1a**), diphenylphosphine oxide (909.9 mg, 4.5 mmol, 1.5 equiv., **2a**), and  $\text{Cs}_2\text{CO}_3$  (3910.0 mg, 12 mmol, 4 equiv.) in  $\text{H}_2\text{O}$  (10 mL) was stirred at 70 °C (oil bath) for 4 h. The reaction was then quenched by saturated  $\text{NH}_4\text{Cl}$  solution (40 mL) and extracted with EtOAc (40 mL x 3). The combined organic layer was washed with saturated brine twice, dried over  $\text{MgSO}_4$ , and concentrated under reduced pressure. The crude product was purified by flash silica gel column chromatography (300-400 mesh) using petroleum ether/ethyl acetate (6/1~3/1) as eluent to afford the pure product **3aa** (1122.5 mg, 87% yield).

## Further transformations of product 3aa

### a) Reduction of product 3aa by $\text{HSiCl}_3$

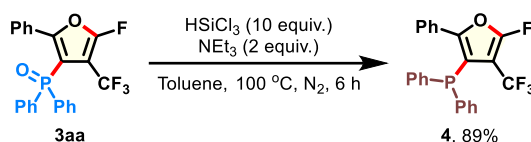

To an oven-dried vial equipped with a stir bar was added (5-fluoro-2-phenyl-4-(trifluoromethyl)furan-3-yl)diphenylphosphine oxide (129.0 mg, 0.3 mmol, 1 equiv., **3aa**) at room temperature under air. The vial was capped with a rubber septum, evacuated and refilled with nitrogen (3 times). Anhydrous toluene (4 mL), trichlorosilane (1354.5 mg, 10 equiv., 3 mmol), and  $\text{Et}_3\text{N}$  (60.7 mg, 2 equiv., 0.6 mmol) were added sequentially via syringe. The reaction mixture was placed in an oil bath at 100 °C and stirred for 6 h. After cooling the vial to room temperature, the reaction vial was opened to air and quenched with saturated  $\text{NH}_4\text{Cl}$  solution (20 mL). The resulting mixture was extracted with EtOAc (20 mL x 3). The combined organic layers were dried over  $\text{MgSO}_4$ , filtered, and concentrated under reduced pressure. The crude product was purified by flash silica gel column chromatography (300-400 mesh) using petroleum ether as eluent to afford the pure product **4** (110.6 mg, 89% yield).

### b) Reduction of product 3aa by $\text{HOPPh}_2$

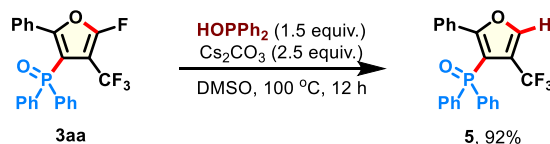

A solution of (5-fluoro-2-phenyl-4-(trifluoromethyl)furan-3-yl)diphenylphosphine oxide (129.0 mg, 0.3 mmol, 1 equiv., **3aa**), diphenylphosphine oxide (91.0 mg, 0.45 mmol, 1.5 equiv.), and  $\text{Cs}_2\text{CO}_3$  (244.4 mg, 0.75 mmol, 2.5 equiv.) in DMSO (2 mL) was stirred at 100 °C under air for 12 h. The reaction was then quenched by saturated  $\text{NH}_4\text{Cl}$  solution (10 mL) and extracted with EtOAc (10 mL x 3). The combined organic layer was washed with saturated brine twice, dried over  $\text{MgSO}_4$ , and concentrated under reduced pressure. The crude product was purified by flash

silica gel column chromatography (300-400 mesh) using petroleum ether/ethyl acetate (6/1~2/1) as eluent to afford the pure product **5** (113.7 mg, 92% yield).

**c) Reaction of product 3aa with MeOH**

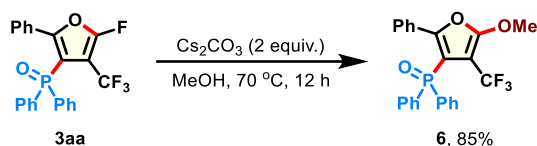

A solution of (5-fluoro-2-phenyl-4-(trifluoromethyl)furan-3-yl)diphenylphosphine oxide (129.0 mg, 0.3 mmol, 1 equiv., **3aa**), and  $\text{Cs}_2\text{CO}_3$  (195.5 mg, 0.6 mmol, 2.0 equiv.) in MeOH (2 mL) was stirred at 70 °C under air for 12 h. The reaction was then quenched by saturated  $\text{NH}_4\text{Cl}$  solution (10 mL) and extracted with EtOAc (10 mL x 3). The combined organic layer was washed with saturated brine twice, dried over  $\text{MgSO}_4$ , and concentrated under reduced pressure. The crude product was purified by flash silica gel column chromatography (300-400 mesh) using petroleum ether/ethyl acetate (5/1~1/1) as eluent to afford the pure product **6** (112.7 mg, 85% yield).

**d) Reaction of product 3aa with benzimidazole**

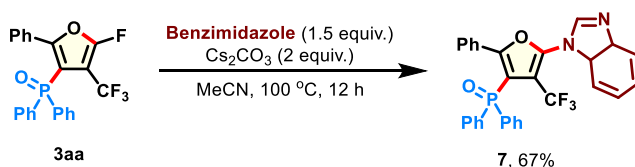

A solution of (5-fluoro-2-phenyl-4-(trifluoromethyl)furan-3-yl)diphenylphosphine oxide (129.0 mg, 0.3 mmol, 1 equiv., **3aa**), benzimidazole (53.2 mg, 0.45 mmol, 1.5 equiv.), and  $\text{Cs}_2\text{CO}_3$  (195.5 mg, 0.6 mmol, 2.0 equiv.) in MeCN (2 mL) was stirred at 100 °C under air for 12 h. The reaction was then quenched by saturated  $\text{NH}_4\text{Cl}$  solution (10 mL) and extracted with EtOAc (10 mL x 3). The combined organic layer was washed with saturated brine twice, dried over  $\text{MgSO}_4$ , and concentrated under reduced pressure. The crude product was purified by flash silica gel column chromatography (300-400 mesh) using petroleum ether/ethyl acetate (4/1~1/1) as eluent to afford the pure product **7** (106.2 mg, 67% yield).

**e) Reaction of product 3aa with Grignard reagent**

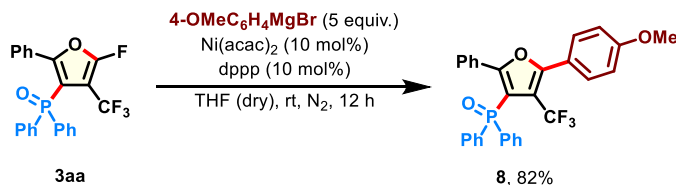

To an oven-dried vial equipped with a stir bar was added (5-fluoro-2-phenyl-4-(trifluoromethyl)furan-3-yl)diphenylphosphine oxide (129.0 mg, 0.3 mmol, 1 equiv., **3aa**),  $\text{Ni(acac)}_2$  (7.7 mg, 0.03 mmol, 0.1 equiv.), and dppp (12.4 mg, 0.03 mmol, 0.1 equiv.) at room temperature under air. The vial was capped with a rubber septum, evacuated and refilled with nitrogen (3 times). Anhydrous THF (1 mL) and 4- $\text{OMeC}_6\text{H}_4\text{MgBr}$  (1 mL, 1.5 mmol, 1.5 mol/L in THF, 5 equiv.) were added sequentially via syringe. The reaction was stirred at room temperature for 12 h. The reaction was then quenched by saturated  $\text{NH}_4\text{Cl}$  solution (10 mL) and

extracted with EtOAc (10 mL x 3). The combined organic layer was washed with saturated brine twice, dried over MgSO<sub>4</sub>, and concentrated under reduced pressure. The crude product was purified by flash silica gel column chromatography (300-400 mesh) using petroleum ether/ethyl acetate (6/1~1/1) as eluent to afford the pure product **8** (127.7 mg, 82% yield).

## Mechanistic studies

### a) The reactivity of trifluoromethylated alkene **9**

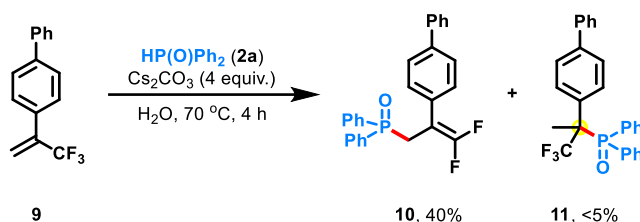

A solution of 4-(3,3,3-trifluoroprop-1-en-2-yl)-1,1'-biphenyl (74.4 mg, 0.3 mmol, 1 equiv., **9**), diphenylphosphine oxide (91.0 mg, 0.45 mmol, 1.5 equiv., **2a**), and Cs<sub>2</sub>CO<sub>3</sub> (391.0 mg, 1.2 mmol, 4 equiv.) in H<sub>2</sub>O (2 mL) was stirred at 70 °C (oil bath) for 4 h. The reaction was then quenched by saturated NH<sub>4</sub>Cl solution (10 mL) and extracted with EtOAc (10 mL x 3). The combined organic layer was washed with saturated brine twice, dried over MgSO<sub>4</sub>, and concentrated under reduced pressure. The crude product was purified by flash silica gel column chromatography (300-400 mesh) using petroleum ether/ethyl acetate (6/1~1/1) as eluent to afford the pure product **10** (51.7 mg, 40% yield) and product **11** (<5% yield).

**This result indicated that the reaction might initiate via the intermolecular S<sub>N</sub>2'-type defluorinative substitution.**

### b) The reactivity of β,β-di-trichloromethylated alkene **12**

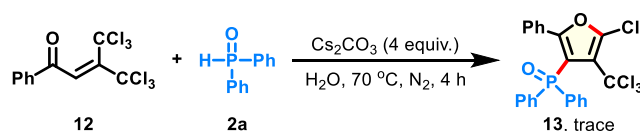

A solution of 4,4,4-trichloro-1-phenyl-3-(trichloromethyl)but-2-en-1-one (109.2 mg, 0.3 mmol, 1 equiv., **12**), diphenylphosphine oxide (91.0 mg, 0.45 mmol, 1.5 equiv., **2a**), and Cs<sub>2</sub>CO<sub>3</sub> (391.0 mg, 1.2 mmol, 4 equiv.) in H<sub>2</sub>O (2 mL) was stirred at 70 °C (oil bath) under N<sub>2</sub> for 4 h. Only trace amount of the product **13** was formed.

**This result suggested that the trifluoromethyl groups were discovered to be crucial in enhancing substrate reactivity.**

### c) The influence of β-substituted group on the reaction efficiency

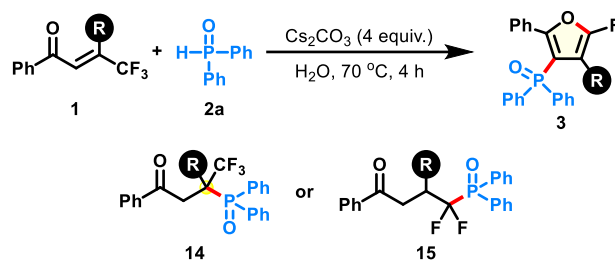

| Entry | R                      | Products           | Yield (%)     |
|-------|------------------------|--------------------|---------------|
| 1     | Me                     | <b>3ra/14a/15a</b> | 0/95/0        |
| 2     | Et                     | <b>3sa/14b/15b</b> | 0/96/0        |
| 3     | $\text{CO}_2\text{Et}$ | <b>3ta/14c/15c</b> | 0/0/8         |
| 4     | H                      | <b>3ua/14d/15d</b> | 0/60/0        |
| 5     | Ph                     | <b>3oa/14e/15e</b> | trace/trace/0 |

A solution of  $\beta$ -trifluoromethyl enone (0.3 mmol, 1 equiv., **1q-t** and **1n**), diphenylphosphine oxide (91.0 mg, 0.45 mmol, 1.5 equiv., **2a**), and  $\text{Cs}_2\text{CO}_3$  (391.0 mg, 1.2 mmol, 4 equiv.) in  $\text{H}_2\text{O}$  (2 mL) was stirred at  $70^\circ\text{C}$  (oil bath) under air for 4 h. The reaction was then quenched by saturated  $\text{NH}_4\text{Cl}$  solution (10 mL) and extracted with EtOAc (10 mL x 3). The organic layer was washed with saturated brine twice, dried over  $\text{MgSO}_4$ , and concentrated under reduced pressure. The crude product was purified by flash silica gel column chromatography (300–400 mesh) using petroleum ether/ethyl acetate (10/1~2/1) as eluent to afford the pure products **14a** (118.6 mg, 95% yield), **14b** (123.9 mg, 96% yield), **14d** (72.4 mg, 60% yield), and **15c** (10.9 mg, 8% yield).

**When R is Me, Et,  $\text{CO}_2\text{Et}$ , H, or Ph, only phospho-Michael addition byproducts 14 and ipso-defluorinative byproduct 15c were formed. These outcomes underscore the importance of the trifluoromethyl group in fine-tuning the reaction selectivity.**

#### d) The heterogeneity of the reaction

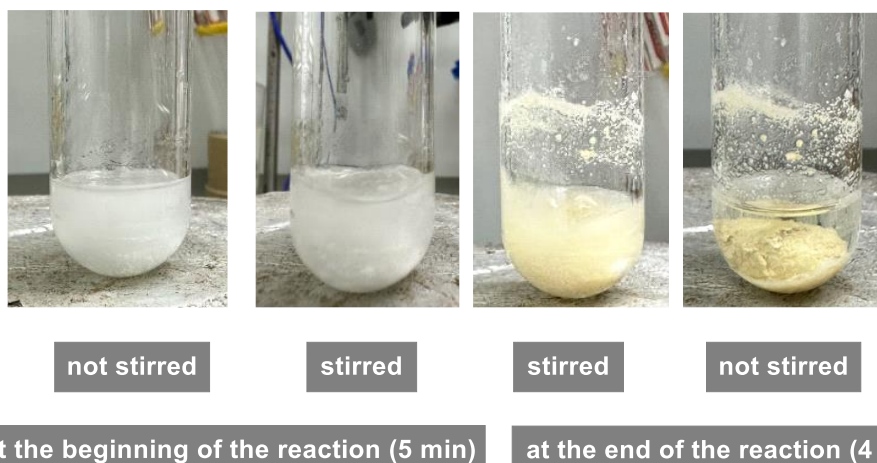

**Insoluble reactants tend to aggregate during the reaction course, and the heterogeneity of the reaction was observed.**

#### e) The isotope kinetic effect (in $\text{D}_2\text{O}$ )

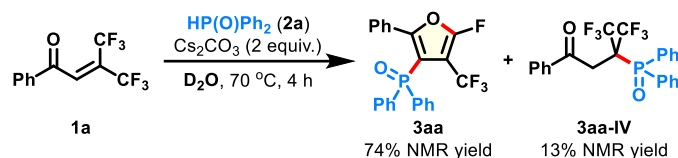

A solution of 4,4,4-trifluoro-1-phenyl-3-(trifluoromethyl)but-2-en-1-one (80.4 mg, 0.3 mmol, 1 equiv., **1a**), diphenylphosphine oxide (91.0 mg, 0.45 mmol, 1.5 equiv., **2a**), and Cs<sub>2</sub>CO<sub>3</sub> (195.5 mg, 0.6 mmol, 2 equiv.) in D<sub>2</sub>O (2 mL) was stirred at 70 °C (oil bath) for 4 h. The reaction was then quenched by saturated NH<sub>4</sub>Cl solution (20 mL) and extracted with EtOAc (20 mL x 3). The combined organic layer was washed with saturated brine twice, dried over MgSO<sub>4</sub>, and concentrated under reduced pressure. <sup>1</sup>H NMR analysis of the obtained residue by using 4-fluoroanisole (0.1 mmol) as an internal standard indicated the formation of product **3aa** (74% NMR yield) and byproduct **3aa-IV** (13% NMR yield), respectively.

**A discernible isotope kinetic effect was observed. This result also supported the specific property of the “on-water” reaction.**

## Optimization of Reaction Conditions

Table S1. Optimization of reaction conditions<sup>a</sup>

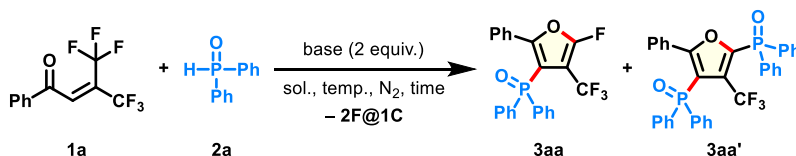

| Entry    | 1a/2a        | Base (2 equiv)                      | Solvent               | Temp. (°C) | Time (h) | Yield of <b>3aa</b> (%) <sup>b</sup> | Yield of <b>3aa'</b> (%) <sup>b</sup> |
|----------|--------------|-------------------------------------|-----------------------|------------|----------|--------------------------------------|---------------------------------------|
| 1        | 1/1.5        | Cs <sub>2</sub> CO <sub>3</sub>     | H <sub>2</sub> O      | 100        | 24       | 85                                   | 15                                    |
| 2        | 1/1.5        | Cs <sub>2</sub> CO <sub>3</sub>     | H <sub>2</sub> O      | 100        | 12       | 88                                   | 12                                    |
| 3        | 1/1.5        | Cs <sub>2</sub> CO <sub>3</sub>     | H <sub>2</sub> O      | 70         | 12       | 94                                   | 6                                     |
| 4        | 1/3          | Cs <sub>2</sub> CO <sub>3</sub>     | H <sub>2</sub> O      | 70         | 12       | 91                                   | 9                                     |
| 5        | 1/1.2        | Cs <sub>2</sub> CO <sub>3</sub>     | H <sub>2</sub> O      | 70         | 12       | 86                                   | 1                                     |
| 6        | 1/1.5        | Cs <sub>2</sub> CO <sub>3</sub>     | H <sub>2</sub> O      | 50         | 12       | 88                                   | 0                                     |
| 7        | 1/1.5        | Cs <sub>2</sub> CO <sub>3</sub>     | H <sub>2</sub> O      | rt         | 12       | 71                                   | 0                                     |
| 8        | 1/1.5        | Cs <sub>2</sub> CO <sub>3</sub>     | H <sub>2</sub> O      | 70         | 8        | 90                                   | 2                                     |
| <b>9</b> | <b>1/1.5</b> | <b>Cs<sub>2</sub>CO<sub>3</sub></b> | <b>H<sub>2</sub>O</b> | <b>70</b>  | <b>4</b> | <b>97 (94)<sup>c</sup></b>           | <b>1</b>                              |
| 10       | 1/1.5        | K <sub>3</sub> PO <sub>4</sub>      | H <sub>2</sub> O      | 70         | 4        | 76                                   | 0                                     |
| 11       | 1/1.5        | DBU                                 | H <sub>2</sub> O      | 70         | 4        | 62                                   | 8                                     |
| 12       | 1/1.5        | LiOH                                | H <sub>2</sub> O      | 70         | 4        | 65                                   | 1                                     |
| 13       | 1/1.5        | Cs <sub>2</sub> CO <sub>3</sub>     | MeOH                  | 70         | 4        | 8                                    | 8                                     |
| 14       | 1/1.5        | Cs <sub>2</sub> CO <sub>3</sub>     | MeCN                  | 70         | 4        | 71                                   | 19                                    |
| 15       | 1/1.5        | Cs <sub>2</sub> CO <sub>3</sub>     | DMSO                  | 70         | 4        | 20                                   | 0                                     |

<sup>a</sup> Reaction conditions: **1a** (0.3 mmol), **2a** (0.36-0.9 mmol), and base (0.6 mmol) in solvent (2 mL) at r.t.-100 °C under N<sub>2</sub>. <sup>b</sup> Yields were determined by <sup>19</sup>F NMR analysis with PhOCF<sub>3</sub> (0.1 mmol) as an internal standard. <sup>c</sup> Isolated yield.

## The X-ray crystal structure of products

The single crystal was grown from the mixed solution of EtOAc/DCM/DMSO by slowly

evaporating the above solvents at room temperature.

**(5-Fluoro-2-phenyl-4-(trifluoromethyl)furan-3-yl)diphenylphosphine oxide** (**3aa**;  
displacement ellipsoids are drawn at the 50% probability levels):

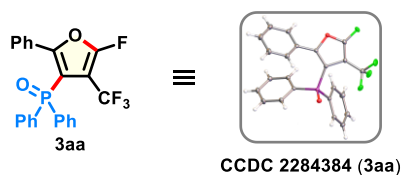

**Table S2.** Crystal data and structure refinement for **3aa**

|                                             |                                                                 |
|---------------------------------------------|-----------------------------------------------------------------|
| Identification code                         | <b>3aa</b>                                                      |
| Empirical formula                           | C <sub>23</sub> H <sub>15</sub> F <sub>4</sub> O <sub>2</sub> P |
| Formula weight                              | 430.32                                                          |
| Temperature/K                               | 169.99(10)                                                      |
| Crystal system                              | monoclinic                                                      |
| Space group                                 | P2 <sub>1</sub> /c                                              |
| a/Å                                         | 16.8764(3)                                                      |
| b/Å                                         | 20.6631(4)                                                      |
| c/Å                                         | 11.3864(2)                                                      |
| α/°                                         | 90                                                              |
| β/°                                         | 92.772(2)                                                       |
| γ/°                                         | 90                                                              |
| Volume/Å <sup>3</sup>                       | 3966.00(13)                                                     |
| Z                                           | 8                                                               |
| ρ <sub>calc</sub> /cm <sup>3</sup>          | 1.441                                                           |
| μ/mm <sup>-1</sup>                          | 1.726                                                           |
| F(000)                                      | 1760.0                                                          |
| Crystal size/mm <sup>3</sup>                | 0.15 × 0.13 × 0.11                                              |
| Radiation                                   | Cu Kα (λ = 1.54184)                                             |
| 2θ range for data collection/°              | 5.242 to 147.124                                                |
| Index ranges                                | -20 ≤ h ≤ 20, -25 ≤ k ≤ 24, -8 ≤ l ≤ 13                         |
| Reflections collected                       | 16062                                                           |
| Independent reflections                     | 7786 [R <sub>int</sub> = 0.0411, R <sub>sigma</sub> = 0.0510]   |
| Data/restraints/parameters                  | 7786/0/541                                                      |
| Goodness-of-fit on F <sup>2</sup>           | 1.078                                                           |
| Final R indexes [I ≥ 2σ (I)]                | R <sub>1</sub> = 0.0491, wR <sub>2</sub> = 0.1286               |
| Final R indexes [all data]                  | R <sub>1</sub> = 0.0615, wR <sub>2</sub> = 0.1415               |
| Largest diff. peak/hole / e Å <sup>-3</sup> | 0.34/-0.30                                                      |

### Crystal structure determination of [3aa]

**Crystal Data** for C<sub>23</sub>H<sub>15</sub>F<sub>4</sub>O<sub>2</sub>P (*M* = 430.32 g/mol): monoclinic, space group P2<sub>1</sub>/c (no. 14), *a* =



16.8764(3) Å,  $b = 20.6631(4)$  Å,  $c = 11.3864(2)$  Å,  $\beta = 92.772(2)^\circ$ ,  $V = 3966.00(13)$  Å<sup>3</sup>,  $Z = 8$ ,  $T = 169.99(10)$  K,  $\mu(\text{Cu K}\alpha) = 1.726$  mm<sup>-1</sup>,  $D_{\text{calc}} = 1.441$  g/cm<sup>3</sup>, 16062 reflections measured ( $5.242^\circ \leq 2\theta \leq 147.124^\circ$ ), 7786 unique ( $R_{\text{int}} = 0.0411$ ,  $R_{\text{sigma}} = 0.0510$ ) which were used in all calculations. The final  $R_1$  was 0.0491 ( $I > 2\sigma(I)$ ) and  $wR_2$  was 0.1415 (all data).

**(5-Fluoro-2,4-diphenylfuran-3-yl)diphenylphosphine oxide (3oa)**; displacement ellipsoids are drawn at the 50% probability levels):

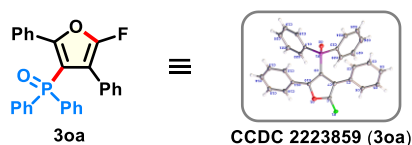

**Table S3.** Crystal data and structure refinement for **3oa**

|                                                |                                                                  |
|------------------------------------------------|------------------------------------------------------------------|
| Identification code                            | <b>3oa</b>                                                       |
| Empirical formula                              | C <sub>28</sub> H <sub>20</sub> FO <sub>2</sub> P                |
| Formula weight                                 | 438.41                                                           |
| Temperature/K                                  | 150.00(10)                                                       |
| Crystal system                                 | monoclinic                                                       |
| Space group                                    | P2 <sub>1</sub> /c                                               |
| $a/\text{Å}$                                   | 12.9054(3)                                                       |
| $b/\text{Å}$                                   | 15.6356(3)                                                       |
| $c/\text{Å}$                                   | 11.0833(2)                                                       |
| $\alpha/^\circ$                                | 90                                                               |
| $\beta/^\circ$                                 | 105.718(2)                                                       |
| $\gamma/^\circ$                                | 90                                                               |
| Volume/Å <sup>3</sup>                          | 2152.80(8)                                                       |
| Z                                              | 4                                                                |
| $\rho_{\text{calc}}/\text{cm}^3$               | 1.353                                                            |
| $\mu/\text{mm}^{-1}$                           | 1.397                                                            |
| F(000)                                         | 912.0                                                            |
| Crystal size/mm <sup>3</sup>                   | 0.14 × 0.12 × 0.1                                                |
| Radiation                                      | Cu K $\alpha$ ( $\lambda = 1.54184$ )                            |
| 2 $\theta$ range for data collection/ $^\circ$ | 7.116 to 147.664                                                 |
| Index ranges                                   | -16 ≤ $h$ ≤ 12, -19 ≤ $k$ ≤ 18, -13 ≤ $l$ ≤ 12                   |
| Reflections collected                          | 8405                                                             |
| Independent reflections                        | 4247 [ $R_{\text{int}} = 0.0212$ , $R_{\text{sigma}} = 0.0279$ ] |
| Data/restraints/parameters                     | 4247/0/299                                                       |
| Goodness-of-fit on F <sup>2</sup>              | 1.088                                                            |
| Final R indexes [ $I \geq 2\sigma(I)$ ]        | $R_1 = 0.0431$ , $wR_2 = 0.1104$                                 |
| Final R indexes [all data]                     | $R_1 = 0.0474$ , $wR_2 = 0.1130$                                 |
| Largest diff. peak/hole / e Å <sup>-3</sup>    | 0.28/-0.39                                                       |

### Crystal structure determination of [30a]

**Crystal Data** for  $C_{28}H_{20}FO_2P$  ( $M = 438.41$  g/mol): monoclinic, space group  $P2_1/c$  (no. 14),  $a = 12.9054(3)$  Å,  $b = 15.6356(3)$  Å,  $c = 11.0833(2)$  Å,  $\beta = 105.718(2)^\circ$ ,  $V = 2152.80(8)$  Å<sup>3</sup>,  $Z = 4$ ,  $T = 150.00(10)$  K,  $\mu(\text{Cu K}\alpha) = 1.397$  mm<sup>-1</sup>,  $D_{\text{calc}} = 1.353$  g/cm<sup>3</sup>, 8405 reflections measured ( $7.116^\circ \leq 2\theta \leq 147.664^\circ$ ), 4247 unique ( $R_{\text{int}} = 0.0212$ ,  $R_{\text{sigma}} = 0.0279$ ) which were used in all calculations. The final  $R_1$  was 0.0431 ( $I > 2\sigma(I)$ ) and  $wR_2$  was 0.1130 (all data).

### Characterization data for products

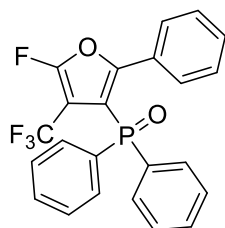

#### (5-Fluoro-2-phenyl-4-(trifluoromethyl)furan-3-yl)diphenylphosphine oxide (3aa):

Yield = 94% (121.6 mg). White solid. M.p. 156.0–157.9 °C.

Purified by flash silica gel column chromatography (petroleum ether/ethyl acetate, 6/1~2/1).

**<sup>1</sup>H NMR (400 MHz, CDCl<sub>3</sub>):**  $\delta = 7.68\text{--}7.59$  (m, 4H), 7.41–7.35 (m, 2H), 7.32–7.24 (m, 4H), 7.22–7.18 (m, 2H), 7.18–7.12 (m, 1H), 7.06–6.99 (m, 2H) ppm.

**<sup>19</sup>F NMR (376 MHz, CDCl<sub>3</sub>):**  $\delta = -54.72$  (d,  $J = 16.4$  Hz, 3F),  $-105.76$  (qd,  $J = 15.3, 4.5$  Hz, 1F) ppm.

**<sup>31</sup>P NMR (162 MHz, CDCl<sub>3</sub>):**  $\delta = 18.82$  ppm.

**<sup>13</sup>C NMR (100 MHz, CDCl<sub>3</sub>):**  $\delta = 157.3\text{--}154.2$  (m, 1C), 152.0 (d,  $J = 14.0$  Hz), 132.2 (d,  $J = 2.6$  Hz), 131.8 (d,  $J = 10.3$  Hz), 131.6 (d,  $J = 109.1$  Hz), 129.9, 129.7, 128.4 (d,  $J = 12.9$  Hz), 127.9, 127.4, 120.6 (qd,  $J = 263.4, 5.9$  Hz), 112.1 (d,  $J = 106.2$  Hz), 92.9–92.6 (m, 1C) ppm.

**HRMS (m/z):** calcd for  $C_{23}H_{16}F_4O_2P$   $[M+H]^+$  431.0819, found: 431.0816.

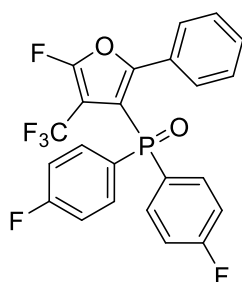

#### (5-Fluoro-2-phenyl-4-(trifluoromethyl)furan-3-yl)bis(4-fluorophenyl)phosphine oxide (3ab):

Yield = 90% (126.1 mg). White solid. M.p. 152.7–153.9 °C.

Purified by flash silica gel column chromatography (petroleum ether/ethyl acetate, 8/1~2/1).

**<sup>1</sup>H NMR (400 MHz, CDCl<sub>3</sub>):**  $\delta = 7.65\text{--}7.57$  (m, 4H), 7.25–7.18 (m, 3H), 7.11–7.07 (m, 2H), 7.01–6.96 (m, 4H) ppm.

**<sup>19</sup>F NMR (376 MHz, CDCl<sub>3</sub>):**  $\delta = -54.74$  (d,  $J = 15.5$  Hz, 3F),  $-105.33$  (qd,  $J = 15.8, 3.7$  Hz, 1F),  $-105.72\text{--} -105.84$  (m, 2F) ppm.

**<sup>31</sup>P NMR (162 MHz, CDCl<sub>3</sub>):**  $\delta = 16.99$  ppm.

**<sup>13</sup>C NMR (100 MHz, CDCl<sub>3</sub>):**  $\delta = 165.3$  (dd,  $J = 254.5, 3.5$  Hz), 157.4–154.3 (m, 1C), 152.2 (d,  $J$

= 14.4 Hz), 134.3 (dd,  $J = 11.8, 9.0$  Hz), 130.2, 129.8, 128.1, 127.3, 126.9 (d,  $J = 3.7$  Hz), 120.6 (qd,  $J = 268.5, 5.3$  Hz), 115.9 (dd,  $J = 21.6, 14.0$  Hz), 112.0 (d,  $J = 110.1$  Hz), 93.0–92.4 (m, 1C) ppm.

**HRMS (m/z):** calcd for  $C_{23}H_{14}F_6O_2P$   $[M+H]^+$  467.0630, found: 467.0627.

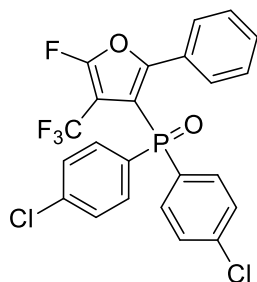

**Bis(4-chlorophenyl)(5-fluoro-2-phenyl-4-(trifluoromethyl)furan-3-yl)phosphine oxide (3ac):**

Yield = 89% (133.2 mg). White solid. M.p. 153.8–155.5 °C.

Purified by flash silica gel column chromatography (petroleum ether/ethyl acetate, 6/1~2/1).

**$^1H$  NMR (400 MHz,  $CDCl_3$ ):**  $\delta = 7.59$ – $7.51$  (m, 4H),  $7.31$ – $7.25$  (m, 5H),  $7.22$ – $7.18$  (m, 2H),  $7.13$ – $7.08$  (m, 2H) ppm.

**$^{19}F$  NMR (376 MHz,  $CDCl_3$ ):**  $\delta = -54.62$  (d,  $J = 16.1$  Hz, 3F),  $-105.87$  (qd,  $J = 16.3, 2.9$  Hz, 1F) ppm.

**$^{31}P$  NMR (162 MHz,  $CDCl_3$ ):**  $\delta = 16.97$  ppm.

**$^{13}C$  NMR (100 MHz,  $CDCl_3$ ):**  $\delta = 157.4$ – $154.3$  (m, 1C), 152.3 (d,  $J = 14.4$  Hz), 139.2 (d,  $J = 3.6$  Hz), 133.1 (d,  $J = 11.1$  Hz), 130.2, 129.9 (d,  $J = 113.6$  Hz), 129.8, 128.9 (d,  $J = 13.5$  Hz), 128.1, 127.1, 120.6 (qd,  $J = 266.7, 5.2$  Hz), 111.6 (d,  $J = 111.5$  Hz), 93.4–91.7 (m, 1C) ppm.

**HRMS (m/z):** calcd for  $C_{23}H_{14}Cl_2F_4O_2P$   $[M+H]^+$  499.0039, found: 499.0039.

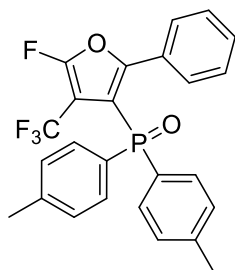

**(5-Fluoro-2-phenyl-4-(trifluoromethyl)furan-3-yl)di-*p*-tolylphosphine oxide (3ad):**

Yield = 96% (132.2 mg). White solid. M.p. 157.9–158.8 °C.

Purified by flash silica gel column chromatography (petroleum ether/ethyl acetate, 6/1~2/1).

**$^1H$  NMR (400 MHz,  $CDCl_3$ ):**  $\delta = 7.52$ – $7.44$  (m, 4H),  $7.18$ – $7.13$  (m, 3H),  $7.06$  (dd,  $J = 8.1, 2.9$  Hz, 4H),  $7.04$ – $6.98$  (m, 2H), 2.28 (s, 6H) ppm.

**$^{19}F$  NMR (376 MHz,  $CDCl_3$ ):**  $\delta = -54.71$  (d,  $J = 16.0$  Hz, 3F),  $-105.97$  (qd,  $J = 16.2, 3.0$  Hz, 1F) ppm.

**$^{31}P$  NMR (162 MHz,  $CDCl_3$ ):**  $\delta = 19.57$  ppm.

**$^{13}C$  NMR (100 MHz,  $CDCl_3$ ):**  $\delta = 157.2$ – $154.1$  (m, 1C), 151.6 (d,  $J = 14.0$  Hz), 142.7 (d,  $J = 2.9$  Hz), 131.8 (d,  $J = 10.6$  Hz), 129.7, 129.4, 129.1, 129.0 (d,  $J = 13.4$  Hz), 127.8, 127.7 (d,  $J = 43.5$  Hz), 120.8 (qd,  $J = 267.5, 10.1$  Hz), 112.7 (d,  $J = 107.3$  Hz), 93.0–92.5 (m, 1C), 21.5 ppm.

**HRMS (m/z):** calcd for  $C_{25}H_{20}F_4O_2P$   $[M+H]^+$  459.1132, found: 459.1126.

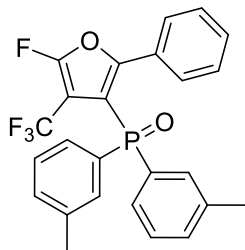

**(5-Fluoro-2-phenyl-4-(trifluoromethyl)furan-3-yl)di-*m*-tolylphosphine oxide (3ae):**

Yield = 90% (124.0 mg). White solid. M.p. 148.9–150.8 °C.

Purified by flash silica gel column chromatography (petroleum ether/ethyl acetate, 7/1~2/1).

**<sup>1</sup>H NMR (400 MHz, CDCl<sub>3</sub>):**  $\delta$  = 7.48–7.42 (m, 2H), 7.41–7.33 (m, 2H), 7.20–7.11 (m, 7H), 7.03 (dd,  $J$  = 8.4, 7.0 Hz, 2H), 2.22 (s, 6H) ppm.

**<sup>19</sup>F NMR (376 MHz, CDCl<sub>3</sub>):**  $\delta$  = -54.72 (d,  $J$  = 15.0 Hz, 3F), -105.94 (qd,  $J$  = 16.1, 3.6 Hz, 1F) ppm.

**<sup>31</sup>P NMR (162 MHz, CDCl<sub>3</sub>):**  $\delta$  = 19.32 ppm.

**<sup>13</sup>C NMR (100 MHz, CDCl<sub>3</sub>):**  $\delta$  = 154.4–154.2 (m, 1C), 151.7 (d,  $J$  = 14.2 Hz), 138.2 (d,  $J$  = 12.8 Hz), 132.9 (d,  $J$  = 2.9 Hz), 132.3 (d,  $J$  = 10.0 Hz), 131.5 (d,  $J$  = 111.0 Hz), 129.8, 129.5, 128.8 (d,  $J$  = 10.5 Hz), 128.2 (d,  $J$  = 13.6 Hz), 127.7, 127.5, 120.8 (qd,  $J$  = 267.5, 5.3 Hz), 112.4 (d,  $J$  = 106.5 Hz), 93.1–92.5 (m, 1C), 11.3 ppm.

**HRMS (m/z):** calcd for C<sub>25</sub>H<sub>20</sub>F<sub>4</sub>O<sub>2</sub>P [M+H]<sup>+</sup> 459.1132, found: 459.1138.

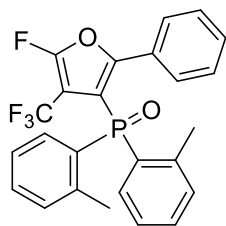

**(5-Fluoro-2-phenyl-4-(trifluoromethyl)furan-3-yl)di-*o*-tolylphosphine oxide (3af):**

Yield = 81% (111.6 mg). White solid. M.p. 151.2–153.1 °C.

Purified by flash silica gel column chromatography (petroleum ether/ethyl acetate, 10/1~2/1).

**<sup>1</sup>H NMR (400 MHz, CDCl<sub>3</sub>):**  $\delta$  = 7.55–7.27 (m, 3H), 7.24–7.10 (m, 5H), 7.10–6.81 (m, 5H), 2.53 (s, 6H) ppm.

**<sup>19</sup>F NMR (376 MHz, CDCl<sub>3</sub>):**  $\delta$  = -54.92 (d,  $J$  = 16.1 Hz, 3F), -105.23 (qd,  $J$  = 16.4, 3.0 Hz, 1F) ppm.

**<sup>31</sup>P NMR (162 MHz, CDCl<sub>3</sub>):**  $\delta$  = 27.41 ppm.

**<sup>13</sup>C NMR (100 MHz, CDCl<sub>3</sub>):**  $\delta$  = 157.6–154.1 (m, 1C), 150.8 (d,  $J$  = 13.6 Hz), 143.8, 132.8, 132.4, 132.0 (d,  $J$  = 11.0 Hz), 129.8, 129.3, 128.8, 127.7, 127.1, 125.3 (d,  $J$  = 13.6 Hz), 120.7 (qd,  $J$  = 268.4, 5.3 Hz), 112.1 (dd,  $J$  = 105.4, 3.6 Hz), 93.8–92.4 (m, 1C), 21.7 (d,  $J$  = 4.8 Hz) ppm.

**HRMS (m/z):** calcd for C<sub>25</sub>H<sub>20</sub>F<sub>4</sub>O<sub>2</sub>P [M+H]<sup>+</sup> 459.1132, found: 459.1131.

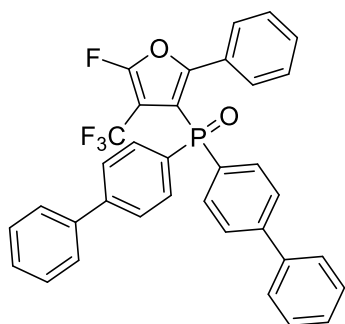

**Di([1,1'-biphenyl]-4-yl)(5-fluoro-2-phenyl-4-(trifluoromethyl)furan-3-yl)phosphine oxide (3ag):**

Yield = 82% (143.5 mg). White solid. M.p. 166.1–167.9 °C.

Purified by flash silica gel column chromatography (petroleum ether/ethyl acetate, 6/1~3/1).

<sup>1</sup>H NMR (400 MHz, CDCl<sub>3</sub>): δ = 7.79–7.70 (m, 4H), 7.56–7.50 (m, 8H), 7.49–7.42 (m, 4H), 7.42–7.35 (m, 2H), 7.27–7.20 (m, 2H), 7.15 (t, *J* = 7.5 Hz, 1H), 7.08–7.01 (m, 2H) ppm.

<sup>19</sup>F NMR (376 MHz, CDCl<sub>3</sub>): δ = -54.56 (d, *J* = 15.2 Hz, 3F), -105.62 (qd, *J* = 14.9, 3.3 Hz, 1F) ppm.

<sup>31</sup>P NMR (162 MHz, CDCl<sub>3</sub>): δ = 18.73 ppm.

<sup>13</sup>C NMR (100 MHz, CDCl<sub>3</sub>): δ = 157.4–154.3 (m, 1C), 151.8 (d, *J* = 14.2 Hz), 145.0 (d, *J* = 2.9 Hz), 139.9, 132.4 (d, *J* = 10.6 Hz), 130.2 (d, *J* = 113.2 Hz), 129.9, 129.7, 129.0, 128.3, 127.9, 127.5, 127.3, 127.1 (d, *J* = 13.2 Hz), 120.8 (qd, *J* = 267.4, 5.0 Hz), 112.5 (d, *J* = 108.2 Hz), 93.6–92.0 (m, 1C) ppm.

HRMS (*m/z*): calcd for C<sub>35</sub>H<sub>24</sub>F<sub>4</sub>O<sub>2</sub>P [M+H]<sup>+</sup> 583.1445, found: 583.1451.

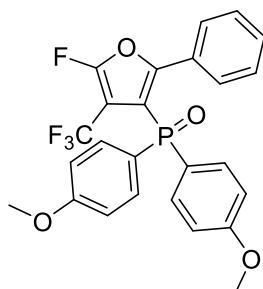

**(5-Fluoro-2-phenyl-4-(trifluoromethyl)furan-3-yl)bis(4-methoxyphenyl)phosphine oxide (3ah):**

Yield = 87% (128.2 mg). White solid. M.p. 144.0–145.1 °C.

Purified by flash silica gel column chromatography (petroleum ether/ethyl acetate, 4/1~1/1).

<sup>1</sup>H NMR (400 MHz, CDCl<sub>3</sub>): δ = 7.55–7.46 (m, 4H), 7.20–7.13 (m, 3H), 7.08–7.01 (m, 2H), 6.80–6.73 (m, 4H), 3.75 (s, 6H) ppm.

<sup>19</sup>F NMR (376 MHz, CDCl<sub>3</sub>): δ = -54.78 (d, *J* = 16.3 Hz, 3F), -106.02 (qd, *J* = 14.9, 3.0 Hz, 1F) ppm.

<sup>31</sup>P NMR (162 MHz, CDCl<sub>3</sub>): δ = 19.20 ppm.

<sup>13</sup>C NMR (100 MHz, CDCl<sub>3</sub>): δ = 162.6 (d, *J* = 3.0 Hz), 157.2–154.1 (m, 1C), 151.5 (d, *J* = 14.0 Hz), 133.7 (d, *J* = 11.8 Hz), 129.8, 129.6, 127.8, 127.6, 123.1 (d, *J* = 118.8 Hz), 120.7 (qd, *J* = 268.6, 5.4 Hz), 113.9 (d, *J* = 14.0 Hz), 113.0 (d, *J* = 108.8 Hz), 92.9–92.4 (m, 1C), 55.3 ppm.

HRMS (*m/z*): calcd for C<sub>25</sub>H<sub>20</sub>F<sub>4</sub>O<sub>4</sub>P [M+H]<sup>+</sup> 491.1030, found: 491.1028.

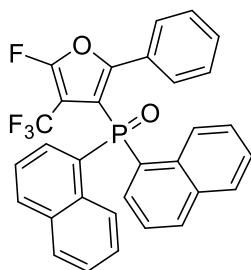

**(5-Fluoro-2-phenyl-4-(trifluoromethyl)furan-3-yl)di(naphthalen-1-yl)phosphine oxide (3ai):**

Yield = 91% (145.0 mg). White solid. M.p. 166.6–168.5 °C.

Purified by flash silica gel column chromatography (petroleum ether/ethyl acetate, 5/1~2/1).

**<sup>1</sup>H NMR (400 MHz, CDCl<sub>3</sub>):**  $\delta$  = 8.32 (dt,  $J$  = 14.8, 1.9 Hz, 2H), 7.84–7.68 (m, 6H), 7.63 (ddd,  $J$  = 10.2, 8.5, 1.6 Hz, 2H), 7.56–7.44 (m, 4H), 7.23–7.15 (m, 2H), 6.85–6.72 (m, 3H) ppm.

**<sup>19</sup>F NMR (376 MHz, CDCl<sub>3</sub>):**  $\delta$  = -54.62 (d,  $J$  = 16.3 Hz, 3F), -103.60 (qd,  $J$  = 16.4, 2.8 Hz, 1F) ppm.

**<sup>31</sup>P NMR (162 MHz, CDCl<sub>3</sub>):**  $\delta$  = 19.02 ppm.

**<sup>13</sup>C NMR (100 MHz, CDCl<sub>3</sub>):**  $\delta$  = 157.3–154.3 (m, 1C), 152.0 (d,  $J$  = 14.4 Hz), 134.7 (d,  $J$  = 2.6 Hz), 134.1 (d,  $J$  = 9.7 Hz), 132.3 (d,  $J$  = 14.1 Hz), 129.62, 129.57, 128.9, 128.8 (d,  $J$  = 98.2 Hz), 128.4, 128.2, 127.7, 127.5, 127.1, 126.9 (qd,  $J$  = 266.9, 5.3 Hz), 126.2 (d,  $J$  = 11.1 Hz), 120.2 (m, 1C), 112.4 (d,  $J$  = 109.2 Hz), 93.2–92.6 (m, 1C) ppm.

**HRMS (m/z):** calcd for C<sub>31</sub>H<sub>20</sub>F<sub>4</sub>O<sub>2</sub>P [M+H]<sup>+</sup> 531.1132, found: 531.1135.

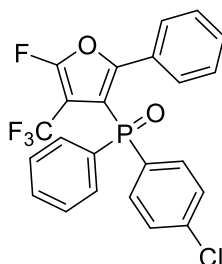

**(4-Chlorophenyl)(5-fluoro-2-phenyl-4-(trifluoromethyl)furan-3-yl)(phenyl)phosphine oxide (3aj):**

Yield = 93% (129.7 mg). White solid. M.p. 153.9–155.4 °C.

Purified by flash silica gel column chromatography (petroleum ether/ethyl acetate, 10/1~2/1).

**<sup>1</sup>H NMR (400 MHz, CDCl<sub>3</sub>):**  $\delta$  = 7.67–7.59 (m, 2H), 7.56–7.49 (m, 2H), 7.45–7.39 (m, 1H), 7.34–7.29 (m, 2H), 7.25–7.16 (m, 5H), 7.09–7.03 (m, 2H) ppm.

**<sup>19</sup>F NMR (376 MHz, CDCl<sub>3</sub>):**  $\delta$  = -54.67 (d,  $J$  = 15.0 Hz, 3F), -105.49 (qd,  $J$  = 15.5, 4.0 Hz, 1F) ppm.

**<sup>31</sup>P NMR (162 MHz, CDCl<sub>3</sub>):**  $\delta$  = 17.87 ppm.

**<sup>13</sup>C NMR (100 MHz, CDCl<sub>3</sub>):**  $\delta$  = 157.3–154.3 (m, 1C), 152.1 (d,  $J$  = 14.3 Hz), 138.9 (d,  $J$  = 3.5 Hz), 133.3 (d,  $J$  = 11.1 Hz), 132.4 (d,  $J$  = 2.9 Hz), 131.8, 131.6 (d,  $J$  = 10.3 Hz), 130.8 (d,  $J$  = 11.6 Hz), 130.0, 129.8, 128.62 (d,  $J$  = 26.3 Hz), 128.61, 128.0, 127.3, 120.6 (qd,  $J$  = 268.6, 5.3 Hz), 111.9 (d,  $J$  = 109.5 Hz), 93.0–92.5 (m, 1C) ppm.

**HRMS (m/z):** calcd for C<sub>23</sub>H<sub>15</sub>ClF<sub>4</sub>O<sub>2</sub>P [M+H]<sup>+</sup> 465.0429, found: 465.0430.

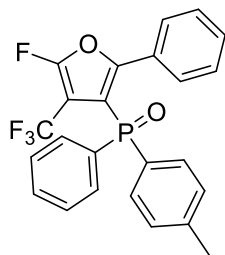

**(5-Fluoro-2-phenyl-4-(trifluoromethyl)furan-3-yl)(phenyl)(*p*-tolyl)phosphine oxide (3ak):**

Yield = 87% (116.2 mg). White solid. M.p. 158.5–160.3 °C.

Purified by flash silica gel column chromatography (petroleum ether/ethyl acetate, 10/1~2/1).

**<sup>1</sup>H NMR (400 MHz, CDCl<sub>3</sub>):**  $\delta$  = 7.67–7.57 (m, 2H), 7.54–7.46 (m, 2H), 7.41–7.33 (m, 1H), 7.29–7.24 (m, 2H), 7.20–7.13 (m, 3H), 7.08 (dd,  $J$  = 8.0, 3.0 Hz, 2H), 7.05–6.99 (m, 2H), 2.29 (s, 3H) ppm.

**<sup>19</sup>F NMR (376 MHz, CDCl<sub>3</sub>):**  $\delta$  = -54.71 (d,  $J$  = 16.4 Hz, 3F), -105.89 (qd,  $J$  = 15.6, 3.8 Hz, 1F) ppm.

**<sup>31</sup>P NMR (162 MHz, CDCl<sub>3</sub>):**  $\delta$  = 19.21 ppm.

**<sup>13</sup>C NMR (100 MHz, CDCl<sub>3</sub>):**  $\delta$  = 157.3–154.2 (m, 1C), 151.8 (d,  $J$  = 14.0 Hz), 142.8 (d,  $J$  = 3.0 Hz), 132.1 (d,  $J$  = 2.9 Hz), 131.9 (d,  $J$  = 111.5 Hz), 131.83, 131.82 (d,  $J$  = 19.4 Hz), 129.72, 129.67, 129.1 (d,  $J$  = 13.3 Hz), 128.3 (d,  $J$  = 12.8 Hz), 128.2 (d,  $J$  = 114.1 Hz), 127.9, 127.5, 120.6 (qd,  $J$  = 268.7, 5.3 Hz), 112.4 (d,  $J$  = 106.8 Hz), 93.0–92.6 (m, 1C), 21.6 ppm.

**HRMS (m/z):** calcd for C<sub>24</sub>H<sub>18</sub>F<sub>4</sub>O<sub>2</sub>P [M+H]<sup>+</sup> 445.0975, found: 445.0975.

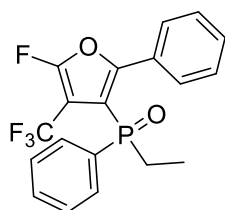

**Ethyl(5-fluoro-2-phenyl-4-(trifluoromethyl)furan-3-yl)(phenyl)phosphine oxide (3al):**

Yield = 86% (98.8 mg). Yellow oil.

Purified by flash silica gel column chromatography (petroleum ether/ethyl acetate, 10/1~2/1).

**<sup>1</sup>H NMR (400 MHz, CDCl<sub>3</sub>):**  $\delta$  = 7.61–7.53 (m, 2H), 7.47–7.43 (m, 2H), 7.42–7.22 (m, 6H), 2.25–2.12 (m, 1H), 2.06–1.94 (m, 1H), 1.02 (dt,  $J$  = 18.7, 7.6 Hz, 3H) ppm.

**<sup>19</sup>F NMR (376 MHz, CDCl<sub>3</sub>):**  $\delta$  = -54.66 (d,  $J$  = 16.4 Hz, 3F), -105.64 (qd,  $J$  = 18.1, 2.9 Hz, 1F) ppm.

**<sup>31</sup>P NMR (162 MHz, CDCl<sub>3</sub>):**  $\delta$  = 28.19 ppm.

**<sup>13</sup>C NMR (100 MHz, CDCl<sub>3</sub>):**  $\delta$  = 157.2–154.1 (m, 1C), 151.7 (d,  $J$  = 13.0 Hz), 132.0 (d,  $J$  = 2.9 Hz), 131.7 (d,  $J$  = 105.1 Hz), 130.9 (d,  $J$  = 9.9 Hz), 130.5, 130.1, 128.4 (d,  $J$  = 12.3 Hz), 128.1, 127.9, 121.0 (qd,  $J$  = 267.8, 5.4 Hz), 112.3 (d,  $J$  = 99.2 Hz), 91.8 (d,  $J$  = 40.0 Hz), 23.2 (d,  $J$  = 77.2 Hz), 5.3 (d,  $J$  = 5.1 Hz) ppm.

**HRMS (m/z):** calcd for C<sub>19</sub>H<sub>16</sub>F<sub>4</sub>O<sub>2</sub>P [M+H]<sup>+</sup> 383.0819, found: 383.0818.

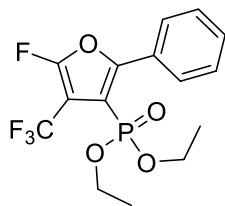

**Diethyl (5-fluoro-2-phenyl-4-(trifluoromethyl)furan-3-yl)phosphonate (3am):**

Yield = 43% (47.4 mg). Colourless oil.

Purified by flash silica gel column chromatography (petroleum ether/ethyl acetate, 5/1~2/1).

<sup>1</sup>H NMR (400 MHz, CDCl<sub>3</sub>): δ = 7.76–7.68 (m, 2H), 7.49–7.36 (m, 3H), 4.15–3.96 (m, 4H), 1.19 (t, *J* = 7.1 Hz, 6H) ppm.

<sup>19</sup>F NMR (376 MHz, CDCl<sub>3</sub>): δ = -56.52 (d, *J* = 17.3 Hz, 3F), -106.32 (qd, *J* = 16.4, 4.5 Hz, 1F) ppm.

<sup>31</sup>P NMR (162 MHz, CDCl<sub>3</sub>): δ = 8.07 ppm.

<sup>13</sup>C NMR (100 MHz, CDCl<sub>3</sub>): δ = 157.0–153.5 (m, 1C), 151.7 (d, *J* = 20.4 Hz), 130.5, 129.3, 128.3, 127.6, 120.8 (qd, *J* = 267.8, 5.4 Hz), 107.4 (d, *J* = 213.0 Hz), 92.8–92.0 (m, 1C), 62.9 (d, *J* = 5.8 Hz), 16.0 (d, *J* = 6.8 Hz) ppm.

HRMS (*m/z*): calcd for C<sub>15</sub>H<sub>16</sub>F<sub>4</sub>O<sub>4</sub>P [M+H]<sup>+</sup> 367.0717, found: 367.0715.

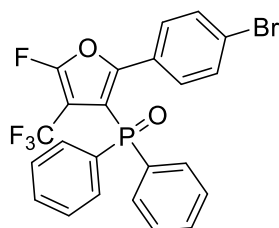

**(2-(4-Bromophenyl)-5-fluoro-4-(trifluoromethyl)furan-3-yl)diphenylphosphine oxide (3ba):**

Yield = 90% (137.4 mg). White solid. M.p. 156.0–157.5 °C.

Purified by flash silica gel column chromatography (petroleum ether/ethyl acetate, 6/1~2/1).

<sup>1</sup>H NMR (400 MHz, CDCl<sub>3</sub>): δ = 7.65–7.60 (m, 4H), 7.48–7.41 (m, 2H), 7.32 (td, *J* = 7.7, 3.2 Hz, 4H), 7.21–7.16 (m, 2H), 7.15–7.08 (m, 2H) ppm.

<sup>19</sup>F NMR (376 MHz, CDCl<sub>3</sub>): δ = -54.73 (d, *J* = 15.6 Hz, 3F), -105.16 (qd, *J* = 15.0, 2.9 Hz, 1F) ppm.

<sup>31</sup>P NMR (162 MHz, CDCl<sub>3</sub>): δ = 18.85 ppm.

<sup>13</sup>C NMR (100 MHz, CDCl<sub>3</sub>): δ = 157.3–154.3 (m, 1C), 150.8 (d, *J* = 13.4 Hz), 132.3 (d, *J* = 2.8 Hz), 131.8 (d, *J* = 10.2 Hz), 131.5 (d, *J* = 111.5 Hz), 131.13, 131.09, 128.5 (d, *J* = 12.8 Hz), 126.3, 124.7, 120.4 (qd, *J* = 262.4, 5.1 Hz), 112.9 (d, *J* = 107.2 Hz), 93.7–91.7 (m, 1C) ppm.

HRMS (*m/z*): calcd for C<sub>23</sub>H<sub>15</sub>BrF<sub>4</sub>O<sub>2</sub>P [M+H]<sup>+</sup> 508.9924, found: 508.9924.

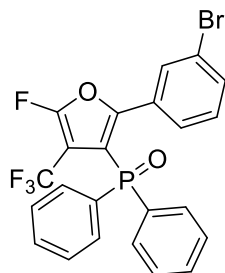

**(2-(3-Bromophenyl)-5-fluoro-4-(trifluoromethyl)furan-3-yl)diphenylphosphine oxide (3ca):**



Yield = 85% (129.8 mg). White solid. M.p. 155.1–156.9 °C.

Purified by flash silica gel column chromatography (petroleum ether/ethyl acetate, 6/1~2/1).

**<sup>1</sup>H NMR (400 MHz, CDCl<sub>3</sub>):**  $\delta$  = 7.69–7.60 (m, 4H), 7.45–7.38 (m, 2H), 7.37–7.25 (m, 6H), 7.21 (dt,  $J$  = 7.8, 1.4 Hz, 1H), 6.98–6.88 (m, 1H) ppm.

**<sup>19</sup>F NMR (376 MHz, CDCl<sub>3</sub>):**  $\delta$  = -54.76 (d,  $J$  = 15.7 Hz, 3F), -105.07 (qd,  $J$  = 14.9, 4.5 Hz, 1F) ppm.

**<sup>31</sup>P NMR (162 MHz, CDCl<sub>3</sub>):**  $\delta$  = 18.35 ppm.

**<sup>13</sup>C NMR (100 MHz, CDCl<sub>3</sub>):**  $\delta$  = 157.4–154.3 (m, 1C), 150.0 (d,  $J$  = 13.8 Hz), 133.0, 132.7, 132.5 (d,  $J$  = 3.1 Hz), 131.7 (d,  $J$  = 10.3 Hz), 131.3 (d,  $J$  = 111.6 Hz), 129.4, 129.1 (d,  $J$  = 2.8 Hz), 128.5 (d,  $J$  = 12.7 Hz), 128.3, 121.9, 120.5 (qd,  $J$  = 268.7, 5.7 Hz), 113.5 (d,  $J$  = 106.7 Hz), 93.2–92.8 (m, 1C) ppm.

**HRMS (m/z):** calcd for C<sub>23</sub>H<sub>15</sub>BrF<sub>4</sub>O<sub>2</sub>P [M+H]<sup>+</sup> 508.9924, found: 508.9920.

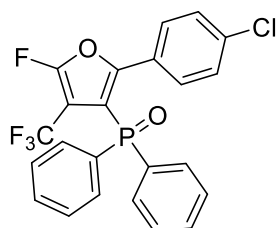

**(2-(4-Chlorophenyl)-5-fluoro-4-(trifluoromethyl)furan-3-yl)diphenylphosphine oxide (3da):**

Yield = 93% (129.7 mg). White solid. M.p. 149.9–151.6 °C.

Purified by flash silica gel column chromatography (petroleum ether/ethyl acetate, 5/1~2/1).

**<sup>1</sup>H NMR (400 MHz, CDCl<sub>3</sub>):**  $\delta$  = 7.67–7.58 (m, 4H), 7.48–7.41 (m, 2H), 7.34–7.30 (m, 4H), 7.22–7.16 (m, 2H), 7.07–7.00 (m, 2H) ppm.

**<sup>19</sup>F NMR (376 MHz, CDCl<sub>3</sub>):**  $\delta$  = -54.71 (d,  $J$  = 16.4 Hz, 3F), -105.23 (qd,  $J$  = 15.7, 3.6 Hz, 1F) ppm.

**<sup>31</sup>P NMR (162 MHz, CDCl<sub>3</sub>):**  $\delta$  = 18.35 ppm.

**<sup>13</sup>C NMR (100 MHz, CDCl<sub>3</sub>):**  $\delta$  = 158.2–153.8 (m, 1C), 150.8 (d,  $J$  = 13.4 Hz), 136.3, 132.4 (d,  $J$  = 2.9 Hz), 132.1, 131.9 (d,  $J$  = 10.3 Hz), 130.9, 128.5 (d,  $J$  = 12.9 Hz), 128.2, 125.9, 120.5 (qd,  $J$  = 267.4, 9.2 Hz), 112.9 (d,  $J$  = 109.0 Hz), 93.8–91.8 (m, 1C) ppm.

**HRMS (m/z):** calcd for C<sub>23</sub>H<sub>15</sub>ClF<sub>4</sub>O<sub>2</sub>P [M+H]<sup>+</sup> 465.0429, found: 465.0435.

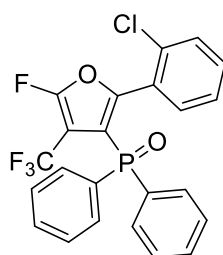

**(2-(2-Chlorophenyl)-5-fluoro-4-(trifluoromethyl)furan-3-yl)diphenylphosphine oxide (3ea):**

Yield = 91% (127.0 mg). White solid. M.p. 148.8–150.6 °C

Purified by flash silica gel column chromatography (petroleum ether/ethyl acetate, 5/1~2/1).

**<sup>1</sup>H NMR (400 MHz, CDCl<sub>3</sub>):**  $\delta$  = 7.67–7.55 (m, 4H), 7.38–7.30 (m, 2H), 7.24 (ddd,  $J$  = 8.7, 6.8, 3.3 Hz, 4H), 7.14–7.04 (m, 2H), 6.92–6.80 (m, 2H) ppm.

**<sup>19</sup>F NMR (376 MHz, CDCl<sub>3</sub>):**  $\delta$  = -54.89 (d,  $J$  = 14.8 Hz, 3F), -104.87 (qd,  $J$  = 15.0, 4.1 Hz, 1F) ppm.

**<sup>31</sup>P NMR (162 MHz, CDCl<sub>3</sub>):**  $\delta$  = 18.26 ppm.

**<sup>13</sup>C NMR (100 MHz, CDCl<sub>3</sub>):**  $\delta$  = 157.5–154.4 (m, 1C), 147.8 (d,  $J$  = 14.7 Hz), 134.8, 133.5, 132.3, 131.7, 131.6, 131.2 (d,  $J$  = 111.9 Hz), 129.3, 128.3 (d,  $J$  = 13.0 Hz), 126.7, 126.4, 120.7 (qd,  $J$  = 268.6, 5.1 Hz), 115.2 (d,  $J$  = 106.9 Hz), 92.7–92.2 (m, 1C) ppm.

**HRMS (m/z):** calcd for C<sub>23</sub>H<sub>15</sub>ClF<sub>4</sub>O<sub>2</sub>P [M+H]<sup>+</sup> 465.0429, found: 465.0427.

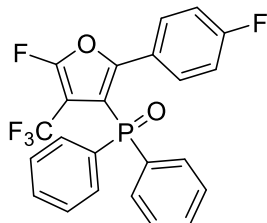

**(5-Fluoro-2-(4-fluorophenyl)-4-(trifluoromethyl)furan-3-yl)diphenylphosphine oxide (3fa):**

Yield = 88% (118.6 mg). Grey solid. M.p. 150.8–151.9 °C.

Purified by flash silica gel column chromatography (petroleum ether/ethyl acetate, 7/1~2/1).

**<sup>1</sup>H NMR (400 MHz, CDCl<sub>3</sub>):**  $\delta$  = 7.70–7.58 (m, 4H), 7.46–7.39 (m, 2H), 7.31 (td,  $J$  = 7.7, 3.2 Hz, 4H), 7.27–7.21 (m, 2H), 6.74 (t,  $J$  = 8.6 Hz, 2H) ppm.

**<sup>19</sup>F NMR (376 MHz, CDCl<sub>3</sub>):**  $\delta$  = -54.75 (d,  $J$  = 15.0 Hz, 3F), -105.56 (qd,  $J$  = 14.9, 3.0 Hz, 1F), -109.2– -109.3 (m, 1F) ppm.

**<sup>31</sup>P NMR (162 MHz, CDCl<sub>3</sub>):**  $\delta$  = 18.70 ppm.

**<sup>13</sup>C NMR (100 MHz, CDCl<sub>3</sub>):**  $\delta$  = 163.5 (d,  $J$  = 251.8 Hz), 157.3–154.2 (m, 1C), 151.0 (d,  $J$  = 13.8 Hz), 132.3 (d,  $J$  = 2.9 Hz), 131.84 (d,  $J$  = 10.6 Hz), 131.82, 131.6 (d,  $J$  = 111.5 Hz), 128.5 (d,  $J$  = 12.9 Hz), 123.7 (d,  $J$  = 3.4 Hz), 120.5 (qd,  $J$  = 268.5, 5.1 Hz), 115.2 (d,  $J$  = 22.2 Hz), 112.4 (d,  $J$  = 106.1 Hz), 94.5–90.8 (m, 1C) ppm.

**HRMS (m/z):** calcd for C<sub>23</sub>H<sub>15</sub>F<sub>5</sub>O<sub>2</sub>P [M+H]<sup>+</sup> 449.0724, found: 449.0729.

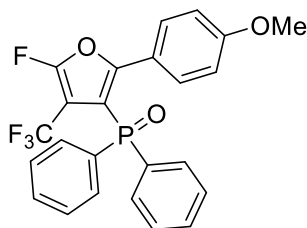

**(5-Fluoro-2-(4-methoxyphenyl)-4-(trifluoromethyl)furan-3-yl)diphenylphosphine oxide (3ga):**

Yield = 94% (130.0 mg). White solid. M.p. 143.9–145.3 °C.

Purified by flash silica gel column chromatography (petroleum ether/ethyl acetate, 6/1~2/1).

**<sup>1</sup>H NMR (400 MHz, CDCl<sub>3</sub>):**  $\delta$  = 7.68–7.58 (m, 4H), 7.44–7.36 (m, 2H), 7.30 (ddd,  $J$  = 8.6, 6.9, 3.3 Hz, 4H), 7.20–7.12 (m, 2H), 6.58–6.52 (m, 2H), 3.69 (s, 3H) ppm.

**<sup>19</sup>F NMR (376 MHz, CDCl<sub>3</sub>):**  $\delta$  = -54.70 (d,  $J$  = 16.3 Hz, 3F), -106.23 (qd,  $J$  = 15.4, 3.3 Hz, 1F) ppm.

**<sup>31</sup>P NMR (162 MHz, CDCl<sub>3</sub>):**  $\delta$  = 18.89 ppm.

**<sup>13</sup>C NMR (100 MHz, CDCl<sub>3</sub>):**  $\delta$  = 160.8, 157.1–154.0 (m, 1C), 152.3 (d,  $J$  = 13.9 Hz), 132.2 (d,  $J$  = 2.8 Hz), 131.91 (d,  $J$  = 111.4 Hz), 131.85 (d,  $J$  = 10.1 Hz), 131.2, 128.4 (d,  $J$  = 12.6 Hz), 120.6 (qd,  $J$  = 268.6, 5.3 Hz), 119.8, 113.4, 111.0 (d,  $J$  = 109.0 Hz), 92.9–92.3 (m, 1C), 55.3 ppm.

**HRMS (m/z):** calcd for C<sub>24</sub>H<sub>18</sub>F<sub>4</sub>O<sub>3</sub>P [M+H]<sup>+</sup> 461.0924, found: 461.0923.

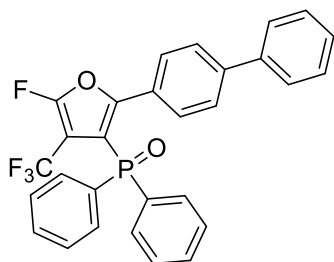

**(2-([1,1'-Biphenyl]-4-yl)-5-fluoro-4-(trifluoromethyl)furan-3-yl)diphenylphosphine oxide (3ha):**

Yield = 86% (131.2 mg). White solid. M.p. 144.2–144.9 °C.

Purified by flash silica gel column chromatography (petroleum ether/ethyl acetate, 6/1~2/1).

<sup>1</sup>H NMR (400 MHz, CDCl<sub>3</sub>): δ = 7.71–7.64 (m, 4H), 7.47–7.35 (m, 7H), 7.33–7.23 (m, 8H) ppm.

<sup>19</sup>F NMR (376 MHz, CDCl<sub>3</sub>): δ = -54.67 (d, *J* = 15.1 Hz, 3F), -105.56 (qd, *J* = 15.6, 3.5 Hz, 1F) ppm.

<sup>31</sup>P NMR (162 MHz, CDCl<sub>3</sub>): δ = 18.88 ppm.

<sup>13</sup>C NMR (100 MHz, CDCl<sub>3</sub>): δ = 157.3–154.1 (m, 1C), 151.8 (d, *J* = 13.7 Hz), 142.6, 140.0, 132.1 (d, *J* = 2.8 Hz), 131.9 (d, *J* = 10.3 Hz), 131.7 (d, *J* = 111.5 Hz), 130.1, 129.0, 128.4 (d, *J* = 12.8 Hz), 128.0, 127.1, 126.5, 126.2, 120.6 (qd, *J* = 268.7, 5.1 Hz), 112.3 (d, *J* = 106.4 Hz), 93.1–92.6 (m, 1C) ppm.

HRMS (m/z): calcd for C<sub>29</sub>H<sub>20</sub>F<sub>4</sub>O<sub>2</sub>P [M+H]<sup>+</sup> 507.1132, found: 507.1129.

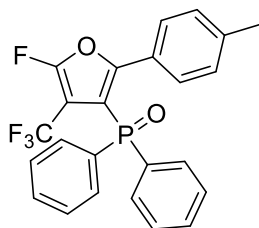

**(5-Fluoro-2-(*p*-tolyl)-4-(trifluoromethyl)furan-3-yl)diphenylphosphine oxide (3ia):**

Yield = 91% (121.5 mg). White solid. M.p. 150.1–151.6 °C.

Purified by flash silica gel column chromatography (petroleum ether/ethyl acetate, 6/1~2/1).

<sup>1</sup>H NMR (400 MHz, CDCl<sub>3</sub>): δ = 7.69–7.59 (m, 4H), 7.43–7.36 (m, 2H), 7.29 (ddd, *J* = 8.7, 7.0, 3.3 Hz, 4H), 7.12–7.07 (m, 2H), 6.83 (d, *J* = 7.9 Hz, 2H), 2.21 (s, 3H) ppm.

<sup>19</sup>F NMR (376 MHz, CDCl<sub>3</sub>): δ = -54.71 (d, *J* = 15.1 Hz, 3F), -106.02 (qd, *J* = 15.3, 3.0 Hz, 1F) ppm.

<sup>31</sup>P NMR (162 MHz, CDCl<sub>3</sub>): δ = 19.05 ppm.

<sup>13</sup>C NMR (100 MHz, CDCl<sub>3</sub>): δ = 157.8–153.4 (m, 1C), 152.4 (d, *J* = 14.1 Hz), 140.2, 132.0 (d, *J* = 2.9 Hz), 131.9 (d, *J* = 10.2 Hz), 131.8 (d, *J* = 111.4 Hz), 129.6, 128.6, 128.3 (d, *J* = 12.8 Hz), 124.5, 120.6 (qd, *J* = 268.4, 5.3 Hz), 111.6 (d, *J* = 108.2 Hz), 93.2–92.0 (m, 1C), 21.4 ppm.

HRMS (m/z): calcd for C<sub>24</sub>H<sub>18</sub>F<sub>4</sub>O<sub>2</sub>P [M+H]<sup>+</sup> 445.0975, found: 445.0978.

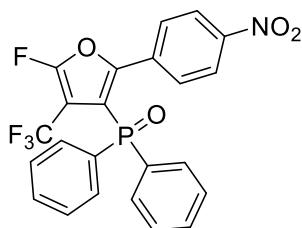

**(5-Fluoro-2-(4-nitrophenyl)-4-(trifluoromethyl)furan-3-yl)diphenylphosphine oxide (3ja):**

Yield = 63% (90.0 mg). White solid. M.p. 149.7–150.2 °C.

Purified by flash silica gel column chromatography (petroleum ether/ethyl acetate, 4/1~1/1).

**<sup>1</sup>H NMR (400 MHz, CDCl<sub>3</sub>):**  $\delta$  = 8.01–7.93 (m, 2H), 7.72–7.62 (m, 4H), 7.61–7.54 (m, 2H), 7.51–7.44 (m, 2H), 7.39–7.34 (m, 4H) ppm.

**<sup>19</sup>F NMR (376 MHz, CDCl<sub>3</sub>):**  $\delta$  = -54.71 (d,  $J$  = 16.3 Hz, 3F), -103.69 (qd,  $J$  = 16.4, 2.8 Hz, 1F) ppm.

**<sup>31</sup>P NMR (162 MHz, CDCl<sub>3</sub>):**  $\delta$  = 19.06 ppm.

**<sup>13</sup>C NMR (100 MHz, CDCl<sub>3</sub>):**  $\delta$  = 158.0–154.4 (m, 1C), 149.4 (d,  $J$  = 12.8 Hz), 148.2, 132.8, 132.7, 132.6 (d,  $J$  = 178.2 Hz), 131.9 (d,  $J$  = 10.4 Hz), 130.6 (d,  $J$  = 2.8 Hz), 128.7 (d,  $J$  = 13.0 Hz), 123.0, 120.3 (qd,  $J$  = 261.9, 5.5 Hz), 115.1 (d,  $J$  = 102.0 Hz), 94.6–92.6 (m, 1C) ppm.

**HRMS (m/z):** calcd for C<sub>24</sub>H<sub>15</sub>F<sub>4</sub>NO<sub>4</sub>P [M+H]<sup>+</sup> 476.0669, found: 476.0667.

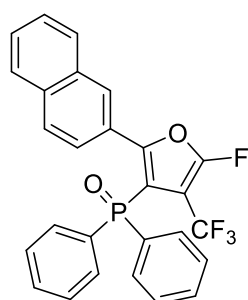

**(5-Fluoro-2-(naphthalen-2-yl)-4-(trifluoromethyl)furan-3-yl)diphenylphosphine oxide (3ka):**

Yield = 88% (126.4 mg). White solid. M.p. 163.2–164.9 °C.

Purified by flash silica gel column chromatography (petroleum ether/ethyl acetate, 10/1~2/1).

**<sup>1</sup>H NMR (400 MHz, CDCl<sub>3</sub>):**  $\delta$  = 7.74–7.63 (m, 6H), 7.62–7.50 (m, 2H), 7.43 (dddd,  $J$  = 17.5, 8.2, 6.9, 1.5 Hz, 2H), 7.30 (dd,  $J$  = 8.6, 1.8 Hz, 1H), 7.25–7.12 (m, 6H) ppm.

**<sup>19</sup>F NMR (376 MHz, CDCl<sub>3</sub>):**  $\delta$  = -54.64 (d,  $J$  = 16.0 Hz, 3F), -106.02 (qd,  $J$  = 15.6, 2.9 Hz, 1F) ppm.

**<sup>31</sup>P NMR (162 MHz, CDCl<sub>3</sub>):**  $\delta$  = 18.70 ppm.

**<sup>13</sup>C NMR (100 MHz, CDCl<sub>3</sub>):**  $\delta$  = 157.5–154.0 (m, 1C), 152.0 (d,  $J$  = 13.9 Hz), 133.3, 132.2, 132.0 (d,  $J$  = 2.9 Hz), 131.8, 131.6 (d,  $J$  = 10.2 Hz), 131.1, 130.8, 128.5, 128.3 (d,  $J$  = 12.9 Hz), 127.7, 127.5, 126.6, 125.4, 124.4, 120.6 (qd,  $J$  = 268.7, 5.3 Hz), 112.6 (d,  $J$  = 107.8 Hz), 93.3–92.5 (m, 1C) ppm.

**HRMS (m/z):** calcd for C<sub>27</sub>H<sub>18</sub>F<sub>4</sub>O<sub>2</sub>P [M+H]<sup>+</sup> 481.0975, found: 481.0975.

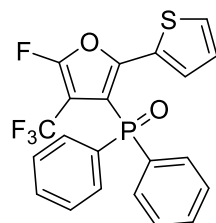

**(5-Fluoro-2-(thiophen-2-yl)-4-(trifluoromethyl)furan-3-yl)diphenylphosphine oxide (3la):**

Yield = 66% (86.5 mg). White solid. M.p. 142.7–143.9 °C.

Purified by flash silica gel column chromatography (petroleum ether/ethyl acetate, 6/1~2/1).

**<sup>1</sup>H NMR (400 MHz, CDCl<sub>3</sub>):**  $\delta$  = 7.74–7.59 (m, 4H), 7.47 (ddd,  $J$  = 7.3, 5.2, 1.6 Hz, 2H), 7.37 (td,  $J$  = 7.6, 3.3 Hz, 4H), 7.28–7.23 (m, 1H), 7.12 (dd,  $J$  = 3.8, 1.2 Hz, 1H), 6.69 (dd,  $J$  = 5.1, 3.7 Hz, 1H) ppm.

**<sup>19</sup>F NMR (376 MHz, CDCl<sub>3</sub>):**  $\delta$  = -54.82 (d,  $J$  = 16.4 Hz, 3F), -104.98 (qd,  $J$  = 16.5, 3.4 Hz, 1F) ppm.

**<sup>31</sup>P NMR (162 MHz, CDCl<sub>3</sub>):**  $\delta$  = 19.67 ppm.

**<sup>13</sup>C NMR (100 MHz, CDCl<sub>3</sub>):**  $\delta$  = 157.7–153.2 (m, 1C), 146.1 (d,  $J$  = 13.3 Hz), 132.5, 132.4 (d,  $J$  = 2.9 Hz), 132.0 (d,  $J$  = 10.7 Hz), 130.9, 129.5, 128.5 (d,  $J$  = 13.0 Hz), 127.7, 127.4, 120.5 (qd,  $J$  = 268.0, 5.3 Hz), 113.1 (d,  $J$  = 86.8 Hz), 93.9–92.0 (m, 1C) ppm.

**HRMS (m/z):** calcd for C<sub>24</sub>H<sub>14</sub>F<sub>4</sub>O<sub>2</sub>PS [M+H]<sup>+</sup> 437.0383, found: 437.0385.

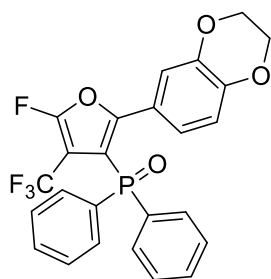

**(2-(2,3-Dihydrobenzo[*b*][1,4]dioxin-6-yl)-5-fluoro-4-(trifluoromethyl)furan-3-yl)diphenylphosphine oxide (3ma):**

Yield = 73% (107.1 mg). White solid. M.p. 138.6–140.4 °C.

Purified by flash silica gel column chromatography (petroleum ether/ethyl acetate, 4/1~1/1).

**<sup>1</sup>H NMR (400 MHz, CDCl<sub>3</sub>):**  $\delta$  = 7.68–7.59 (m, 4H), 7.46–7.39 (m, 2H), 7.32 (ddd,  $J$  = 8.7, 7.1, 3.2 Hz, 4H), 6.71 (dd,  $J$  = 8.4, 2.1 Hz, 1H), 6.61 (d,  $J$  = 2.1 Hz, 1H), 6.53 (d,  $J$  = 8.3 Hz, 1H), 4.18–4.07 (m, 4H) ppm.

**<sup>19</sup>F NMR (376 MHz, CDCl<sub>3</sub>):**  $\delta$  = -54.76 (d,  $J$  = 15.8 Hz, 3F), -106.06 (qd,  $J$  = 15.6, 3.5 Hz, 1F) ppm.

**<sup>31</sup>P NMR (162 MHz, CDCl<sub>3</sub>):**  $\delta$  = 18.97 ppm.

**<sup>13</sup>C NMR (100 MHz, CDCl<sub>3</sub>):**  $\delta$  = 157.0–154.0 (m, 1C), 151.6 (d,  $J$  = 14.1 Hz), 143.8 (d,  $J$  = 268.9 Hz), 132.04, 132.01, 131.82 (d,  $J$  = 10.2 Hz), 131.77 (d,  $J$  = 111.6 Hz), 128.4 (d,  $J$  = 13.0 Hz), 123.2, 120.7 (qd,  $J$  = 269.0, 4.9 Hz), 120.3, 119.2, 116.9, 111.5 (d,  $J$  = 108.7 Hz), 93.1–92.0 (m, 1C), 64.4, 64.1 ppm.

**HRMS (m/z):** calcd for C<sub>25</sub>H<sub>18</sub>F<sub>4</sub>O<sub>4</sub>P [M+H]<sup>+</sup> 489.0873, found: 489.0873.

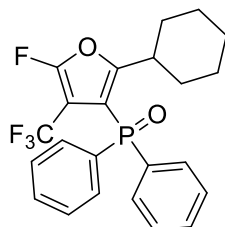

**(2-Cyclohexyl-5-fluoro-4-(trifluoromethyl)furan-3-yl)diphenylphosphine oxide (3na):**

Yield = 82% (107.5 mg). Colourless oil.

Purified by flash silica gel column chromatography (petroleum ether/ethyl acetate, 6/1~2/1).

**<sup>1</sup>H NMR (400 MHz, CDCl<sub>3</sub>):**  $\delta$  = 7.71–7.64 (m, 4H), 7.60–7.53 (m, 2H), 7.49–7.44 (m, 4H), 2.34–2.25 (m, 1H), 1.63–1.50 (m, 5H), 1.44–1.33 (m, 2H), 1.12–1.00 (m, 1H), 0.93–0.76 (m, 2H) ppm.

<sup>19</sup>F NMR (376 MHz, CDCl<sub>3</sub>): δ = -54.90 (d, *J* = 16.0 Hz, 3F), -106.68 (q, *J* = 16.0 Hz, 1F) ppm.

<sup>31</sup>P NMR (162 MHz, CDCl<sub>3</sub>): δ = 21.21 ppm.

<sup>13</sup>C NMR (100 MHz, CDCl<sub>3</sub>): δ = 159.0 (dd, *J* = 15.6, 2.5 Hz), 156.7–153.2 (m, 1C), 132.6 (d, *J* = 2.9 Hz), 132.2 (d, *J* = 111.3 Hz), 131.9 (d, *J* = 10.5 Hz), 128.7 (d, *J* = 12.7 Hz), 120.7 (qd, *J* = 268.1, 5.5 Hz), 109.1 (d, *J* = 111.6 Hz), 90.4, 36.2, 31.2, 25.8, 25.4 ppm.

HRMS (*m/z*): calcd for C<sub>23</sub>H<sub>22</sub>F<sub>4</sub>O<sub>2</sub>P [M+H]<sup>+</sup> 437.1288, found: 437.1286.

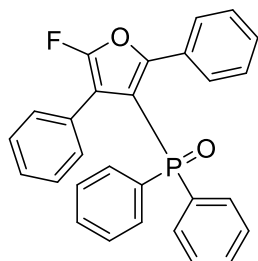

**(5-Fluoro-2,4-diphenylfuran-3-yl)diphenylphosphine oxide (30a):**

Yield = 42% (55.3 mg). White solid. M.p. 121.6–122.5 °C.

Purified by flash silica gel column chromatography (petroleum ether/ethyl acetate, 6/1~2/1).

<sup>1</sup>H NMR (400 MHz, CDCl<sub>3</sub>): δ = 7.62–7.52 (m, 4H), 7.48–7.39 (m, 2H), 7.32–7.23 (m, 2H), 7.15–7.08 (m, 3H), 7.07–7.00 (m, 9H) ppm.

<sup>19</sup>F NMR (376 MHz, CDCl<sub>3</sub>): δ = -120.64 (d, *J* = 4.1 Hz, 1F) ppm.

<sup>31</sup>P NMR (162 MHz, CDCl<sub>3</sub>): δ = 16.86 ppm.

<sup>13</sup>C NMR (100 MHz, CDCl<sub>3</sub>): δ = 154.2 (dd, *J* = 281.1, 16.1 Hz), 151.5 (d, *J* = 15.9 Hz), 132.7 (d, *J* = 109.4 Hz), 131.3 (d, *J* = 9.6 Hz), 131.2, 131.1, 129.9, 129.2, 129.1, 128.7, 128.5 (d, *J* = 3.8 Hz), 128.0 (d, *J* = 6.5 Hz), 127.8 (d, *J* = 11.3 Hz), 127.2, 113.3 (d, *J* = 113.7 Hz), 102.1 (t, *J* = 9.3 Hz) ppm.

HRMS (*m/z*): calcd for C<sub>28</sub>H<sub>21</sub>FO<sub>2</sub>P [M+H]<sup>+</sup> 439.1258, found: 439.1259.

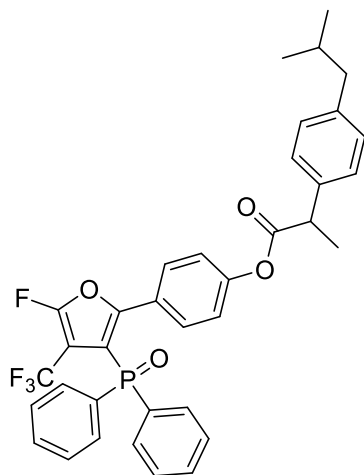

**4-(3-(Diphenylphosphoryl)-5-fluoro-4-(trifluoromethyl)furan-2-yl)phenyl 2-(4-isobutylphenyl)propanoate (3pa):**

Yield = 69% (131.5 mg). White solid. M.p. 149.3–150.1 °C.

Purified by flash silica gel column chromatography (petroleum ether/ethyl acetate, 6/1~3/1).

<sup>1</sup>H NMR (400 MHz, CDCl<sub>3</sub>): δ = 7.62 (ddd, *J* = 12.8, 8.4, 1.4 Hz, 4H), 7.42–7.37 (m, 2H), 7.34–7.23 (m, 6H), 7.23–7.08 (m, 4H), 6.75–6.64 (m, 2H), 3.89 (q, *J* = 7.1 Hz, 1H), 2.47 (d, *J* =

7.2 Hz, 2H), 1.87 (dt,  $J = 13.5, 6.8$  Hz, 1H), 1.57 (d,  $J = 7.1$  Hz, 3H), 0.91 (d,  $J = 6.6$  Hz, 6H) ppm.

$^{19}\text{F}$  NMR (376 MHz,  $\text{CDCl}_3$ ):  $\delta = -54.73$  (d,  $J = 15.8$  Hz, 3F),  $-105.55$  (qd,  $J = 15.1, 3.1$  Hz, 1F) ppm.

$^{31}\text{P}$  NMR (162 MHz,  $\text{CDCl}_3$ ):  $\delta = 18.78$  ppm.

$^{13}\text{C}$  NMR (100 MHz,  $\text{CDCl}_3$ ):  $\delta = 172.6, 157.2\text{--}154.1$  (m, 1C), 152.0, 151.0 (d,  $J = 13.9$  Hz), 141.0, 137.0, 132.4 (d,  $J = 3.0$  Hz), 131.7, 131.5 (d,  $J = 111.6$  Hz), 130.8, 129.6, 128.4 (d,  $J = 12.7$  Hz), 127.2, 124.8, 121.4, 120.5 (qd,  $J = 273.6, 5.0$  Hz), 112.6 (d,  $J = 107.9$  Hz), 93.1–92.6 (m, 1C), 45.2, 45.1, 30.3, 22.4, 18.5 ppm.

HRMS ( $m/z$ ): calcd for  $\text{C}_{36}\text{H}_{32}\text{F}_4\text{O}_4\text{P}$   $[\text{M}+\text{H}]^+$  635.1969, found: 635.1967.

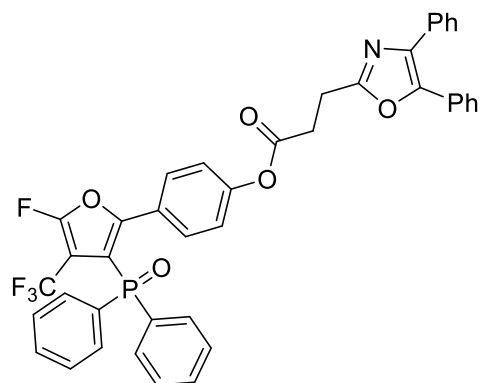

**4-(3-(Diphenylphosphoryl)-5-fluoro-4-(trifluoromethyl)furan-2-yl)phenyl  
3-(4,5-diphenyloxazol-2-yl)propanoate (3qa):**

Yield = 71% (153.8 mg). White solid. M.p. 157.8–159.3 °C.

Purified by flash silica gel column chromatography (petroleum ether/ethyl acetate, 6/1~2/3).

$^1\text{H}$  NMR (400 MHz,  $\text{CDCl}_3$ ):  $\delta = 7.69\text{--}7.55$  (m, 8H), 7.45–7.27 (m, 12H), 7.23–7.18 (m, 2H), 6.83–6.77 (m, 2H), 3.28 (t,  $J = 7.5$  Hz, 2H), 3.13 (t,  $J = 7.0$  Hz, 2H) ppm.

$^{19}\text{F}$  NMR (376 MHz,  $\text{CDCl}_3$ ):  $\delta = -54.74$  (d,  $J = 15.2$  Hz, 3F),  $-105.41$  (qd,  $J = 16.3, 3.5$  Hz, 1F) ppm.

$^{31}\text{P}$  NMR (162 MHz,  $\text{CDCl}_3$ ):  $\delta = 18.81$  ppm.

$^{13}\text{C}$  NMR (100 MHz,  $\text{CDCl}_3$ ):  $\delta = 170.1, 161.4, 154.4\text{--}153.9$  (m, 1C), 151.7, 151.0 (d,  $J = 13.8$  Hz), 145.7, 135.2, 132.5, 132.4, 131.8 (d,  $J = 10.2$  Hz), 131.4 (d,  $J = 111.6$  Hz), 131.0, 128.9, 128.8, 128.7, 128.6, 128.4, 128.3, 127.9, 126.6, 125.1, 121.3, 120.5 (qd,  $J = 273.6, 5.0$  Hz), 112.7 (d,  $J = 107.4$  Hz), 93.2–92.5 (m, 1C), 31.2, 23.5 ppm.

HRMS ( $m/z$ ): calcd for  $\text{C}_{41}\text{H}_{29}\text{F}_4\text{NO}_5\text{P}$   $[\text{M}+\text{H}]^+$  722.1714, found: 722.1718.

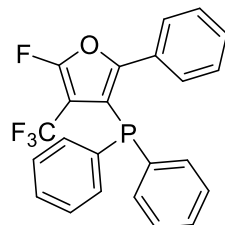

**(5-Fluoro-2-phenyl-4-(trifluoromethyl)furan-3-yl)diphenylphosphane (4):**

Yield = 89% (110.6 mg). White solid. M.p. 134.8–135.3 °C.

Purified by flash silica gel column chromatography (petroleum ether/ethyl acetate, 6/1~2/1).

$^1\text{H}$  NMR (400 MHz,  $\text{CDCl}_3$ ):  $\delta = 7.62\text{--}7.57$  (m, 2H), 7.49–7.43 (m, 4H), 7.42–7.32 (m, 9H) ppm.

**<sup>19</sup>F NMR (376 MHz, CDCl<sub>3</sub>):**  $\delta$  = -55.44 (dd, *J* = 15.7, 7.1 Hz, 3F), -105.28 (q, *J* = 15.7 Hz, 1F) ppm.

**<sup>31</sup>P NMR (162 MHz, CDCl<sub>3</sub>):**  $\delta$  = -24.98 (q, *J* = 7.7 Hz) ppm.

**<sup>13</sup>C NMR (100 MHz, CDCl<sub>3</sub>):**  $\delta$  = 156.0 (dt, *J* = 289.8, 3.8 Hz), 151.6 (d, *J* = 34.1 Hz), 133.9 (d, *J* = 8.6 Hz), 132.6 (d, *J* = 19.3 Hz), 129.5, 129.0 (d, *J* = 7.1 Hz), 128.8, 128.5 (d, *J* = 6.6 Hz), 128.32, 128.26, 121.1 (qd, *J* = 268.3, 5.3 Hz), 112.4 (dd, *J* = 31.6, 4.2 Hz), 93.3 (q, *J* = 39.5 Hz) ppm.

**HRMS (m/z):** calcd for C<sub>23</sub>H<sub>16</sub>F<sub>4</sub>OP [M+H]<sup>+</sup> 415.0869, found: 415.0865.

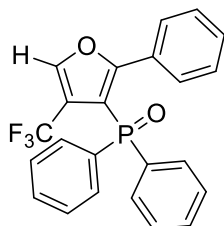

**Diphenyl(2-phenyl-4-(trifluoromethyl)furan-3-yl)phosphine oxide (5):**

Yield = 92% (113.7 mg). White solid. M.p. 138.6–140.3 °C.

Purified by flash silica gel column chromatography (petroleum ether/ethyl acetate, 6/1~2/1).

**<sup>1</sup>H NMR (400 MHz, CDCl<sub>3</sub>):**  $\delta$  = 7.95–7.94 (m, 1H), 7.68–7.55 (m, 4H), 7.41–7.34 (m, 2H), 7.32–7.23 (m, 6H), 7.20–7.12 (m, 1H), 7.10–7.00 (m, 2H) ppm.

**<sup>19</sup>F NMR (376 MHz, CDCl<sub>3</sub>):**  $\delta$  = -55.96 (s, 3F) ppm.

**<sup>31</sup>P NMR (162 MHz, CDCl<sub>3</sub>):**  $\delta$  = 18.82 ppm.

**<sup>13</sup>C NMR (100 MHz, CDCl<sub>3</sub>):**  $\delta$  = 162.9 (d, *J* = 16.0 Hz), 143.9 (td, *J* = 14.0, 6.9 Hz), 132.2 (d, *J* = 111.0 Hz), 132.0 (d, *J* = 2.9 Hz), 131.9 (d, *J* = 10.2 Hz), 129.7, 129.5, 128.7, 128.2 (d, *J* = 12.7 Hz), 127.8, 121.6 (q, *J* = 268.9 Hz), 121.0 (dd, *J* = 37.6, 8.0 Hz), 110.3 (d, *J* = 110.3 Hz) ppm.

**HRMS (m/z):** calcd for C<sub>23</sub>H<sub>17</sub>F<sub>3</sub>O<sub>2</sub>P [M+H]<sup>+</sup> 413.0913, found: 413.0909.

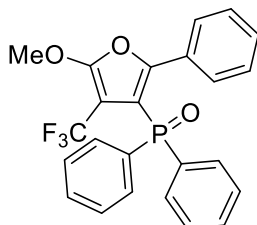

**(5-Methoxy-2-phenyl-4-(trifluoromethyl)furan-3-yl)diphenylphosphine oxide (6):**

Yield = 85% (112.7 mg). White solid. M.p. 121.6–122.5 °C.

Purified by flash silica gel column chromatography (petroleum ether/ethyl acetate, 6/1~2/1).

**<sup>1</sup>H NMR (400 MHz, CDCl<sub>3</sub>):**  $\delta$  = 7.69–7.58 (m, 4H), 7.34 (td, *J* = 7.3, 1.5 Hz, 2H), 7.28–7.18 (m, 6H), 7.14–7.08 (m, 1H), 7.04–6.95 (m, 2H), 4.06 (s, 3H) ppm.

**<sup>19</sup>F NMR (376 MHz, CDCl<sub>3</sub>):**  $\delta$  = -53.47 (s, 3F) ppm.

**<sup>31</sup>P NMR (162 MHz, CDCl<sub>3</sub>):**  $\delta$  = 19.00 ppm.

**<sup>13</sup>C NMR (100 MHz, CDCl<sub>3</sub>):**  $\delta$  = 158.8–158.7 (m, 1C), 151.8 (d, *J* = 14.7 Hz), 132.5 (d, *J* = 110.8 Hz), 131.81, 131.75 (d, *J* = 7.4 Hz), 129.7, 129.3, 128.6, 128.2 (d, *J* = 12.8 Hz), 127.8, 122.0 (q, *J* = 268.0 Hz), 111.7 (d, *J* = 110.6 Hz), 93.1–92.7 (m, 1C), 59.2 ppm.

**HRMS (m/z):** calcd for C<sub>24</sub>H<sub>19</sub>F<sub>3</sub>O<sub>3</sub>P [M+H]<sup>+</sup> 443.1018, found: 443.1018.



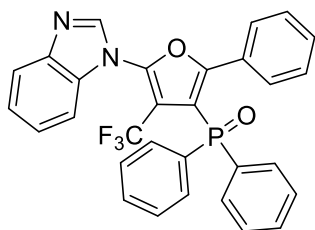

**(5-(1H-benzo[d]imidazol-1-yl)-2-phenyl-4-(trifluoromethyl)furan-3-yl)diphenylphosphine oxide (7):**

Yield = 67% (106.2 mg). White solid. M.p. 121.6–122.5 °C.

Purified by flash silica gel column chromatography (petroleum ether/ethyl acetate, 3/1~1/1).

**<sup>1</sup>H NMR (400 MHz, CDCl<sub>3</sub>):**  $\delta$  = 8.07 (s, 1H), 7.89–7.81 (m, 1H), 7.78–7.66 (m, 4H), 7.46 (dt,  $J$  = 6.9, 2.9 Hz, 1H), 7.43–7.27 (m, 10H), 7.23–7.13 (m, 1H), 7.06 (t,  $J$  = 7.7 Hz, 2H) ppm.

**<sup>19</sup>F NMR (376 MHz, CDCl<sub>3</sub>):**  $\delta$  = -54.21 (s, 3F) ppm.

**<sup>31</sup>P NMR (162 MHz, CDCl<sub>3</sub>):**  $\delta$  = 18.65 ppm.

**<sup>13</sup>C NMR (100 MHz, CDCl<sub>3</sub>):**  $\delta$  = 159.2 (d,  $J$  = 14.1 Hz), 143.1, 143.0–142.5 (m, 1C), 142.2, 133.7, 132.2 (d,  $J$  = 2.9 Hz), 131.8 (d,  $J$  = 111.4 Hz), 131.7 (d,  $J$  = 10.1 Hz), 130.3, 129.7, 128.4 (d,  $J$  = 12.9 Hz), 128.0, 127.6, 125.1, 124.2, 121.0, 120.9 (q,  $J$  = 270.0 Hz), 112.7 (d,  $J$  = 106.6 Hz), 111.5 (qd,  $J$  = 38.2, 7.8 Hz), 111.4 (qd,  $J$  = 38.2, 7.8 Hz), 110.9 ppm.

**HRMS (m/z):** calcd for C<sub>30</sub>H<sub>21</sub>F<sub>3</sub>N<sub>2</sub>O<sub>2</sub>P [M+H]<sup>+</sup> 529.1287, found: 529.1285.

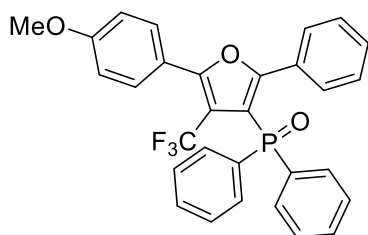

**(5-(4-Methoxyphenyl)-2-phenyl-4-(trifluoromethyl)furan-3-yl)diphenylphosphine oxide (8):**

Yield = 82% (127.7 mg). White solid. M.p. 121.6–122.5 °C.

Purified by flash silica gel column chromatography (petroleum ether/ethyl acetate, 6/1~2/1).

**<sup>1</sup>H NMR (400 MHz, CDCl<sub>3</sub>):**  $\delta$  = 7.72–7.66 (m, 4H), 7.64–7.57 (m, 2H), 7.38–7.31 (m, 2H), 7.31–7.22 (m, 6H), 7.17–7.10 (m, 1H), 7.08–6.99 (m, 2H), 6.99–6.90 (m, 2H), 3.83 (s, 3H) ppm.

**<sup>19</sup>F NMR (376 MHz, CDCl<sub>3</sub>):**  $\delta$  = -51.84 (s, 3F) ppm.

**<sup>31</sup>P NMR (162 MHz, CDCl<sub>3</sub>):**  $\delta$  = 19.13 ppm.

**<sup>13</sup>C NMR (100 MHz, CDCl<sub>3</sub>):**  $\delta$  = 161.1, 160.5 (d,  $J$  = 15.7 Hz), 155.3 (m, 1C), 132.9 (d,  $J$  = 110.8 Hz), 131.8, 131.70, 131.66, 130.2, 129.7, 129.5, 128.9, 128.2 (d,  $J$  = 12.7 Hz), 127.8, 122.3 (q,  $J$  = 269.6 Hz), 120.8, 114.1, 112.0 (d,  $J$  = 110.1 Hz), 55.4 ppm.

**HRMS (m/z):** calcd for C<sub>30</sub>H<sub>23</sub>F<sub>3</sub>O<sub>3</sub>P [M+H]<sup>+</sup> 519.1331, found: 519.1331.

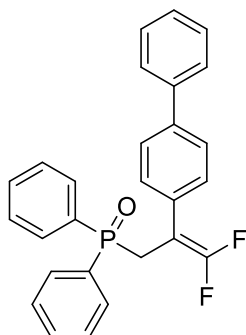

**(2-([1,1'-Biphenyl]-4-yl)-3,3-difluoroallyl)diphenylphosphine oxide (10):**

Yield = 40% (51.7 mg). White solid. 150.0–150.9 °C.

Purified by flash silica gel column chromatography (petroleum ether/ethyl acetate, 6/1~2/1).

<sup>1</sup>H NMR (400 MHz, CDCl<sub>3</sub>): δ = 7.72–7.66 (m, 4H), 7.55–7.51 (m, 2H), 7.49–7.43 (m, 4H), 7.42–7.33 (m, 8H), 7.28 (d, *J* = 1.0 Hz, 1H), 3.47–3.43 (m, 2H) ppm.

<sup>19</sup>F NMR (376 MHz, CDCl<sub>3</sub>): δ = -86.1 (dd, *J* = 34.3, 8.9 Hz, 1F), -87.6 (dd, *J* = 32.8, 13.4 Hz, 1F) ppm.

<sup>31</sup>P NMR (162 MHz, CDCl<sub>3</sub>): δ = 28.58 (dd, *J* = 14.2, 8.3 Hz) ppm.

<sup>13</sup>C NMR (100 MHz, CDCl<sub>3</sub>): δ = 154.7 (td, *J* = 291.4, 10.6 Hz), 140.7, 140.3, 132.5, 132.0 (d, *J* = 2.5 Hz), 131.8, 131.5, 131.1 (d, *J* = 9.4 Hz), 129.1, 128.9, 128.6 (d, *J* = 11.8 Hz), 127.5, 127.1 (d, *J* = 2.3 Hz), 85.5–85.0 (m, 1C), 31.2 (d, *J* = 69.4 Hz) ppm.

HRMS (*m/z*): calcd for C<sub>27</sub>H<sub>22</sub>F<sub>2</sub>OP [M+H]<sup>+</sup> 431.1371, found: 431.1371.

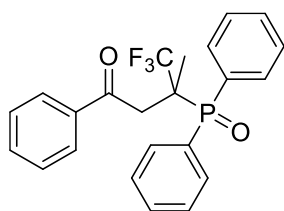

**3-(Diphenylphosphoryl)-4,4,4-trifluoro-3-methyl-1-phenylbutan-1-one (14a):**

Yield = 95% (118.6 mg). White solid. M.p. 121.6–122.5 °C.

Purified by flash silica gel column chromatography (petroleum ether/ethyl acetate, 5/1~3/1).

<sup>1</sup>H NMR (400 MHz, CDCl<sub>3</sub>): δ = 8.12–8.07 (m, 4H), 7.90–7.83 (m, 2H), 7.61–7.48 (m, 7H), 7.42 (t, *J* = 7.7 Hz, 2H), 3.62 (dd, *J* = 15.2, 9.0 Hz, 1H), 3.35 (dd, *J* = 15.2, 8.3 Hz, 1H), 1.76 (d, *J* = 14.9 Hz, 3H) ppm.

<sup>19</sup>F NMR (376 MHz, CDCl<sub>3</sub>): δ = -63.46 (d, *J* = 4.0 Hz, 3F) ppm.

<sup>31</sup>P NMR (162 MHz, CDCl<sub>3</sub>): δ = 31.06 ppm.

<sup>13</sup>C NMR (100 MHz, CDCl<sub>3</sub>): δ = 196.5 (d, *J* = 10.6 Hz), 137.6, 133.4, 132.7–132.3 (m, 3C), 129.6 (dd, *J* = 95.3, 10.1 Hz), 128.7 (d, *J* = 5.3 Hz), 128.5 (d, *J* = 16.9 Hz), 129.0 (q, *J* = 283.4 Hz), 49.8 (dd, *J* = 61.4, 24.8 Hz), 36.4, 15.7 ppm.

HRMS (*m/z*): calcd for C<sub>23</sub>H<sub>21</sub>F<sub>3</sub>O<sub>2</sub>P [M+H]<sup>+</sup> 417.1226, found: 417.1224.

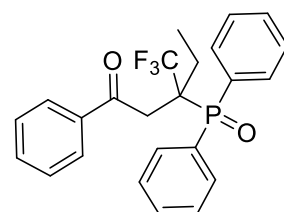

**3-(Diphenylphosphoryl)-1-phenyl-3-(trifluoromethyl)pentan-1-one (14b):**

Yield = 96% (123.9 mg). White solid. M.p. 120.1–121.5 °C.

Purified by flash silica gel column chromatography (petroleum ether/ethyl acetate, 5/1~3/1).

<sup>1</sup>H NMR (400 MHz, CDCl<sub>3</sub>): δ = 8.12–7.96 (m, 4H), 7.91–7.85 (m, 2H), 7.60–7.39 (m, 9H), 3.91 (dd, *J* = 16.6, 7.7 Hz, 1H), 3.55 (dd, *J* = 16.6, 13.2 Hz, 1H), 2.52–2.26 (m, 2H), 1.05 (t, *J* = 7.4 Hz, 3H) ppm.

<sup>19</sup>F NMR (376 MHz, CDCl<sub>3</sub>): δ = -61.16 (s, 3F) ppm.

<sup>31</sup>P NMR (162 MHz, CDCl<sub>3</sub>): δ = 31.49 ppm.

**<sup>13</sup>C NMR (100 MHz, CDCl<sub>3</sub>):**  $\delta$  = 196.1 (d,  $J$  = 8.2 Hz), 137.6, 133.2, 132.4 (dd,  $J$  = 23.0, 8.6 Hz), 132.3 (d,  $J$  = 7.3 Hz), 130.5 (dd,  $J$  = 130.0, 93.9 Hz), 128.6, 128.6 (dd,  $J$  = 11.5, 9.7 Hz), 128.2, 127.2 (q,  $J$  = 283.6 Hz), 54.2 (dd,  $J$  = 59.7, 23.1 Hz), 33.5, 22.3, 9.2 (d,  $J$  = 5.8 Hz) ppm.

**HRMS (m/z):** calcd for C<sub>24</sub>H<sub>23</sub>F<sub>3</sub>O<sub>2</sub>P [M+H]<sup>+</sup> 431.1382, found: 431.1377.

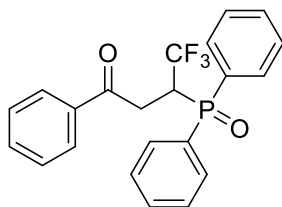

**3-(Diphenylphosphoryl)-4,4,4-trifluoro-1-phenylbutan-1-one (14d):**

Yield = 60% (72.4 mg). White solid. M.p. 116.7–118.4 °C.

Purified by flash silica gel column chromatography (petroleum ether/ethyl acetate, 10/1~3/1).

**<sup>1</sup>H NMR (400 MHz, CDCl<sub>3</sub>):**  $\delta$  = 7.97–7.89 (m, 2H), 7.88–7.80 (m, 4H), 7.59–7.48 (m, 4H), 7.47–7.37 (m, 5H), 4.57–4.43 (m, 1H), 3.63 (dt,  $J$  = 18.9, 6.9 Hz, 1H), 3.43 (ddd,  $J$  = 18.8, 14.9, 3.8 Hz, 1H) ppm.

**<sup>19</sup>F NMR (376 MHz, CDCl<sub>3</sub>):**  $\delta$  = -60.48 (dd,  $J$  = 9.6, 5.2 Hz, 3F) ppm.

**<sup>31</sup>P NMR (162 MHz, CDCl<sub>3</sub>):**  $\delta$  = 28.72–28.45 (m, 1P) ppm.

**<sup>13</sup>C NMR (100 MHz, CDCl<sub>3</sub>):**  $\delta$  = 194.6 (d,  $J$  = 6.7 Hz), 135.5, 134.0, 132.6 (dd,  $J$  = 8.3, 2.9 Hz), 131.2 (dd,  $J$  = 21.6, 9.5 Hz), 130.5 (dd,  $J$  = 103.5, 49.4 Hz), 128.9 (dd,  $J$  = 27.5, 12.3 Hz), 128.8, 128.3, 127.0 (q,  $J$  = 281.3 Hz), 39.3 (dd,  $J$  = 66.2, 26.7 Hz), 33.0 ppm.

**HRMS (m/z):** calcd for C<sub>22</sub>H<sub>19</sub>F<sub>3</sub>O<sub>2</sub>P [M+H]<sup>+</sup> 403.1069, found: 403.1068.

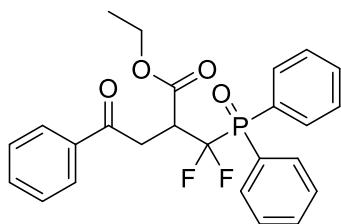

**Ethyl 2-((diphenylphosphoryl)difluoromethyl)-4-oxo-4-phenylbutanoate (15c):**

Yield = 8% (10.9 mg). Colourless oil.

Purified by flash silica gel column chromatography (petroleum ether/ethyl acetate, 10/1~3/1).

**<sup>1</sup>H NMR (400 MHz, CDCl<sub>3</sub>):**  $\delta$  = 7.83–7.75 (m, 2H), 7.74–7.66 (m, 4H), 7.44–7.29 (m, 7H), 7.25–7.18 (m, 2H), 5.05 (ddd,  $J$  = 16.3, 11.5, 2.6 Hz, 1H), 4.00 (qd,  $J$  = 7.2, 0.9 Hz, 2H), 3.42 (ddd,  $J$  = 17.7, 11.5, 5.0 Hz, 1H), 2.86 (ddd,  $J$  = 17.6, 9.0, 2.6 Hz, 1H), 1.10 (t,  $J$  = 7.2 Hz, 3H) ppm.

**<sup>19</sup>F NMR (376 MHz, CDCl<sub>3</sub>):**  $\delta$  = -102.16 (d,  $J$  = 3.7 Hz, 2F) ppm.

**<sup>31</sup>P NMR (162 MHz, CDCl<sub>3</sub>):**  $\delta$  = 28.61 ppm.

**<sup>13</sup>C NMR (100 MHz, CDCl<sub>3</sub>):**  $\delta$  = 197.0 (d,  $J$  = 2.5 Hz), 171.5 (d,  $J$  = 16.6 Hz), 138.1, 132.9, 132.4 (d,  $J$  = 3.0 Hz), 131.6 (dd,  $J$  = 34.5, 9.3 Hz), 130.0 (dd,  $J$  = 100.5, 37.3 Hz), 128.7 (d,  $J$  = 3.7 Hz), 128.60, 128.56, 128.3, 61.4, 47.5 (d,  $J$  = 56.3 Hz), 32.7, 14.0 ppm.

**HRMS (m/z):** calcd for C<sub>25</sub>H<sub>24</sub>F<sub>2</sub>O<sub>4</sub>P [M+H]<sup>+</sup> 457.1375, found: 457.1373.

## **References**

- [1] Wu, X.; Xie, F.; Gridnev, I. D.; Zhang, W. *Org. Lett.* **2018**, *20*, 1638–1642.
- [2] Chu, X.-Q.; Sun, L.-W.; Chen, Y.-L.; Chen, J.-W.; Ying, X.; Ma, M.; Shen, Z.-L. *Green Chem.* **2022**, *24*, 2777–2782.

# $^1\text{H}$ , $^{19}\text{F}$ , $^{31}\text{P}$ , and $^{13}\text{C}$ NMR spectra of products

$^1\text{H}$  NMR spectra of the product **3aa** (400 MHz,  $\text{CDCl}_3$ ):

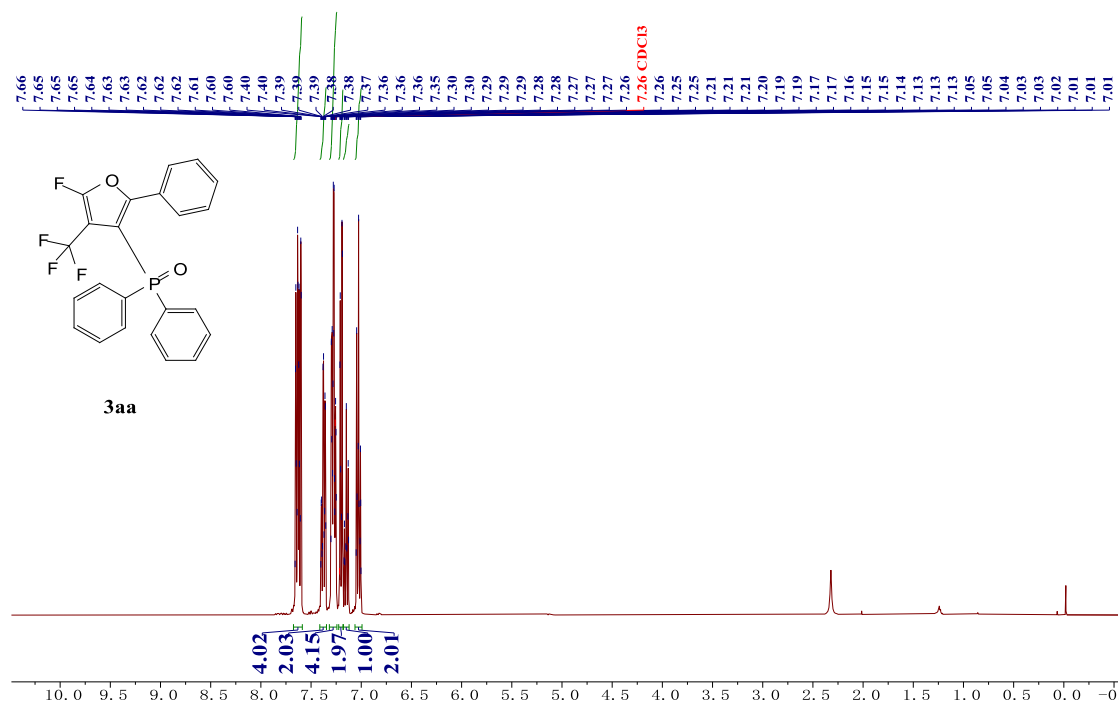

$^{19}\text{F}$  NMR spectra of the product **3aa** (376 MHz,  $\text{CDCl}_3$ ):

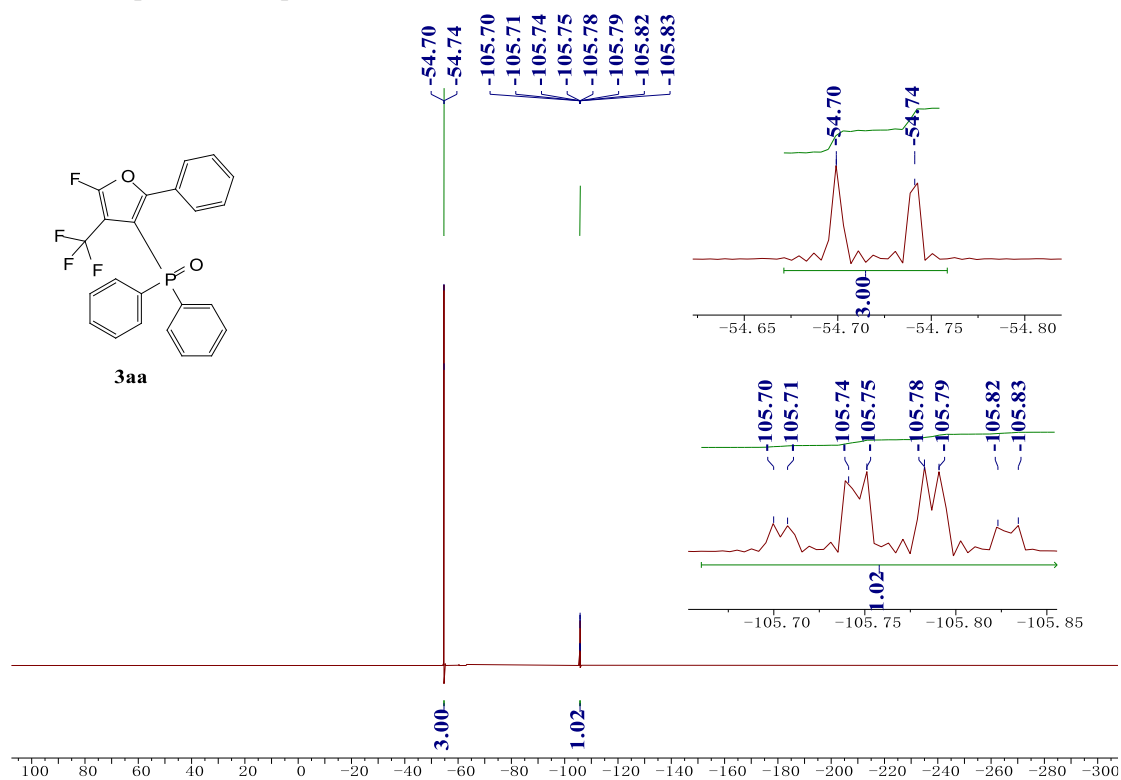

$^{31}\text{P}$  NMR spectra of the product **3aa** (162 MHz,  $\text{CDCl}_3$ ):

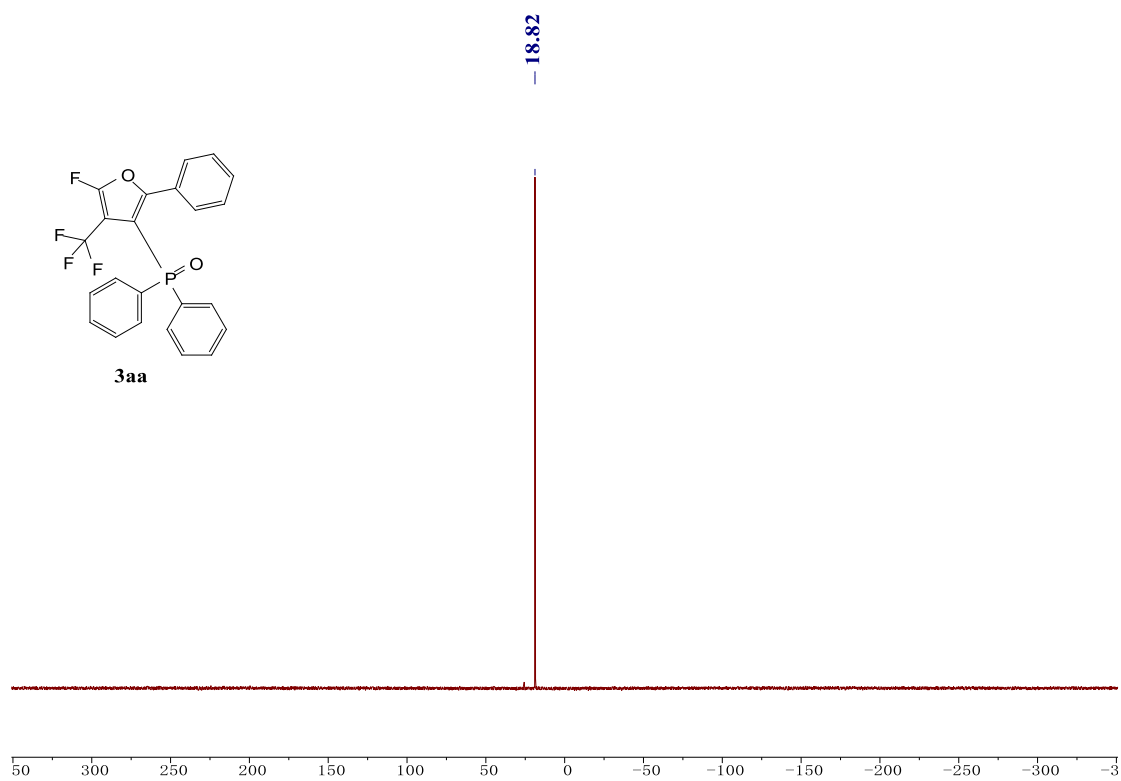

$^{13}\text{C}$  NMR spectra of the product **3aa** (100 MHz,  $\text{CDCl}_3$ ):

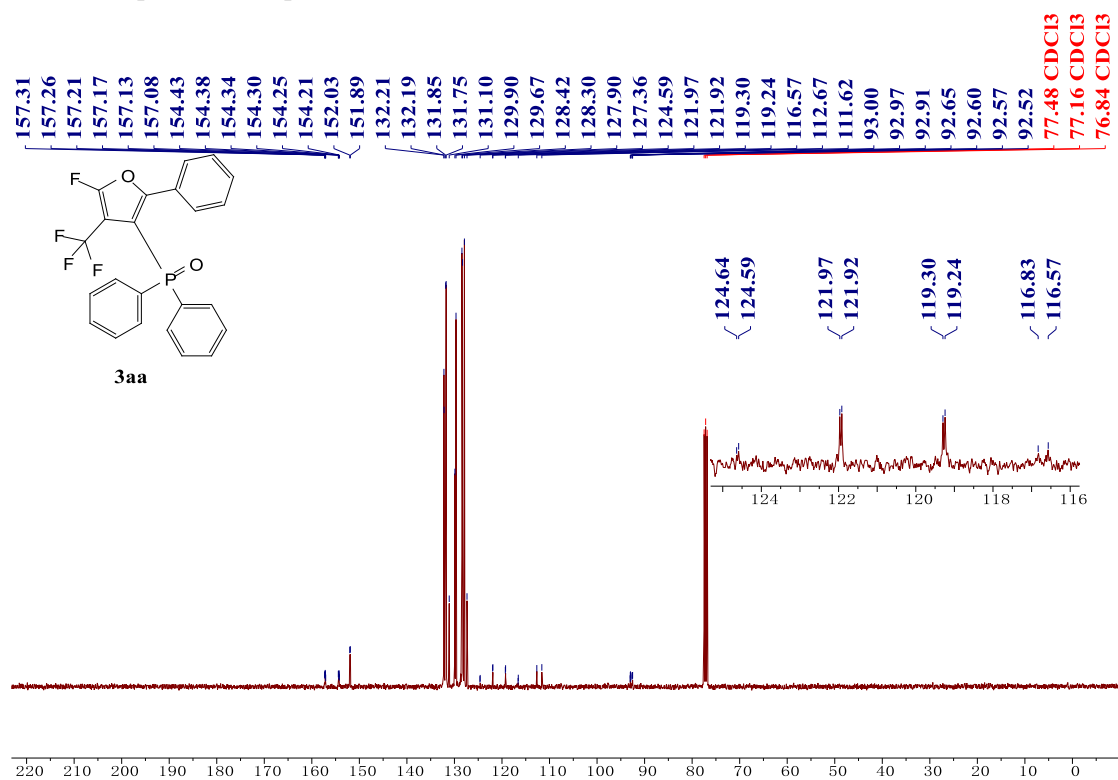

$^1\text{H}$  NMR spectra of the product **3ab** (400 MHz,  $\text{CDCl}_3$ ):

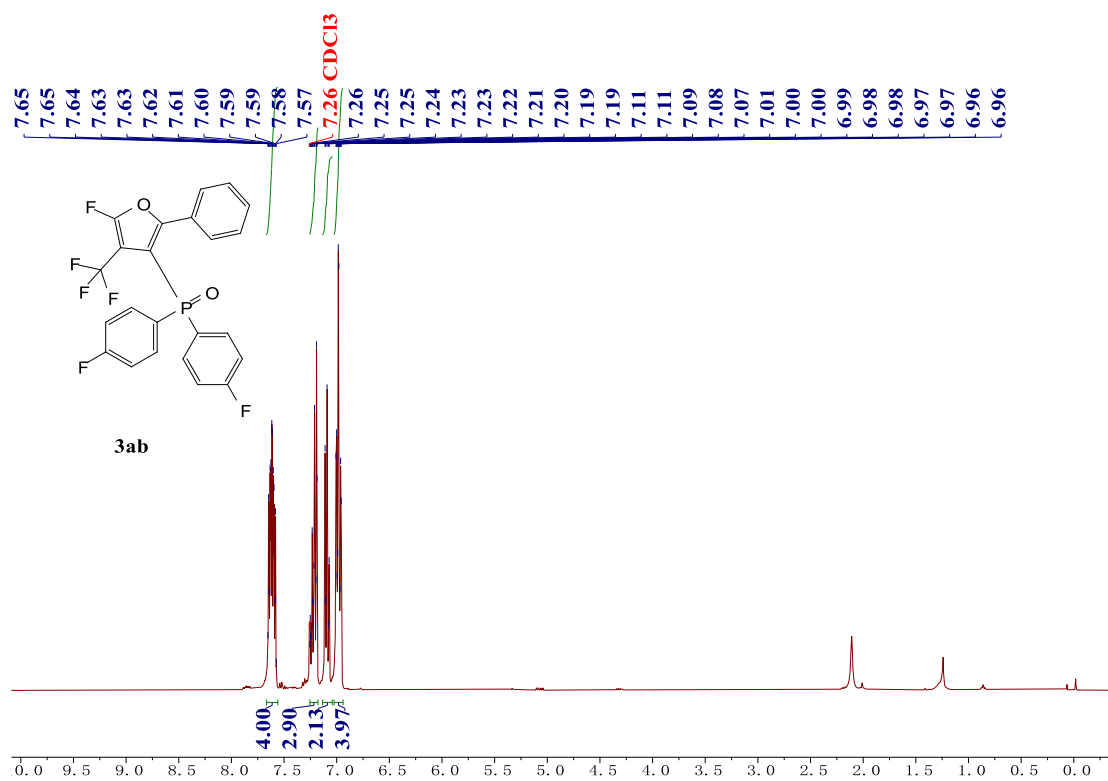

$^{19}\text{F}$  NMR spectra of the product **3ab** (376 MHz,  $\text{CDCl}_3$ ):

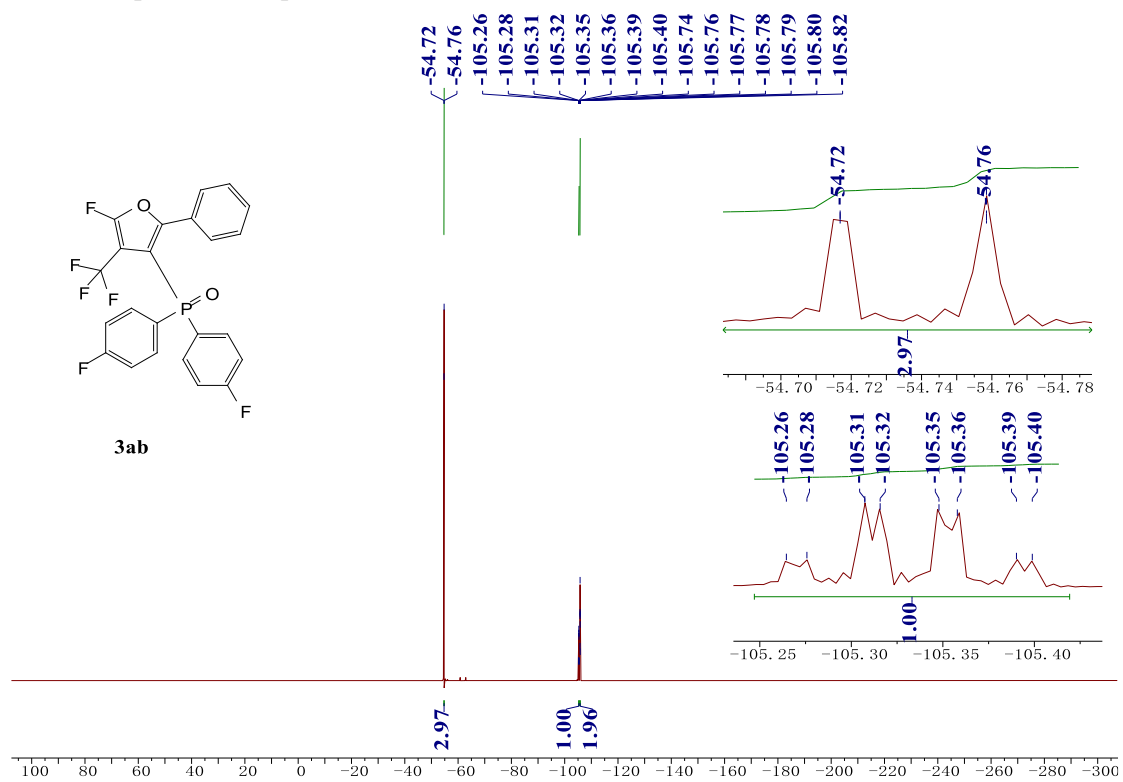

$^{31}\text{P}$  NMR spectra of the product **3ab** (162 MHz,  $\text{CDCl}_3$ ):

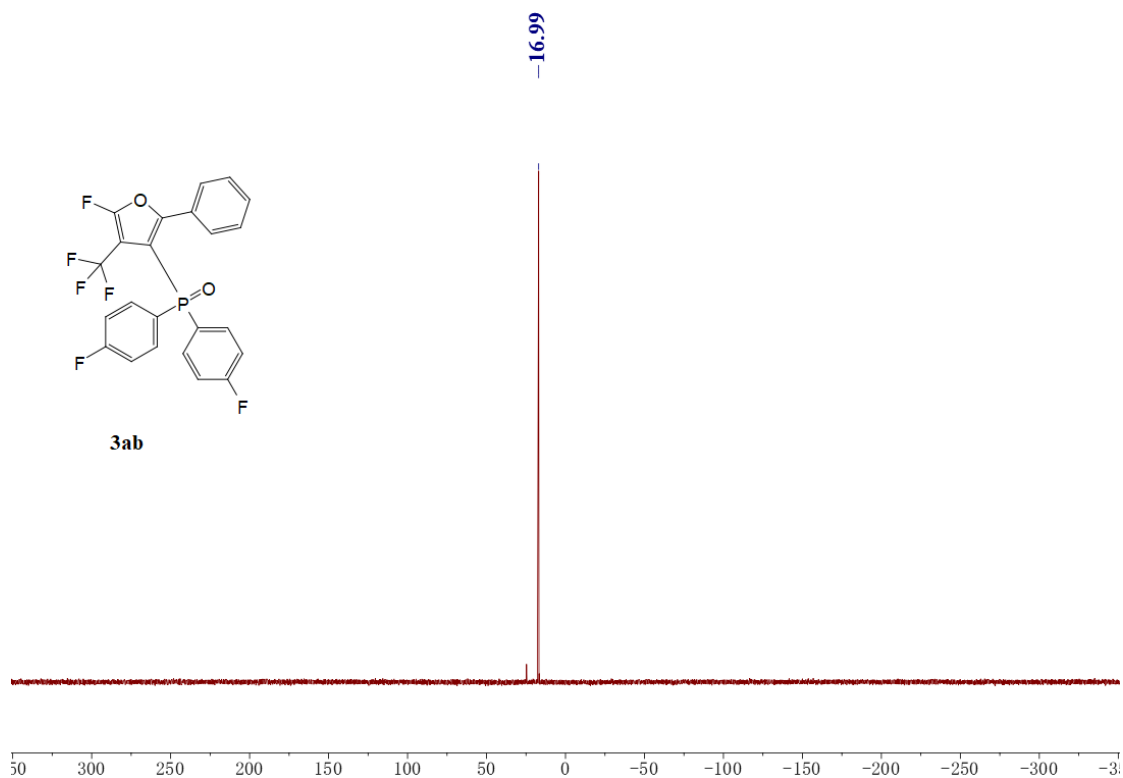

$^{13}\text{C}$  NMR spectra of the product **3ab** (100 MHz,  $\text{CDCl}_3$ ):

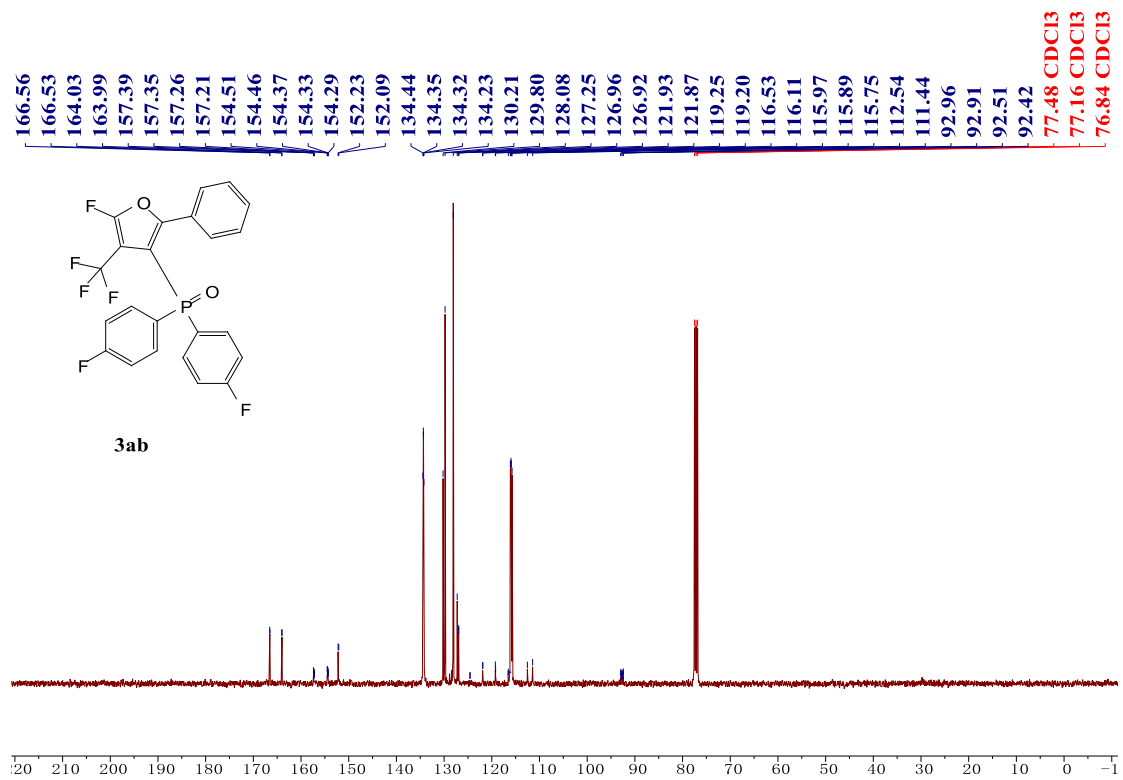



$^1\text{H}$  NMR spectra of the product **3ac** (400 MHz,  $\text{CDCl}_3$ ):

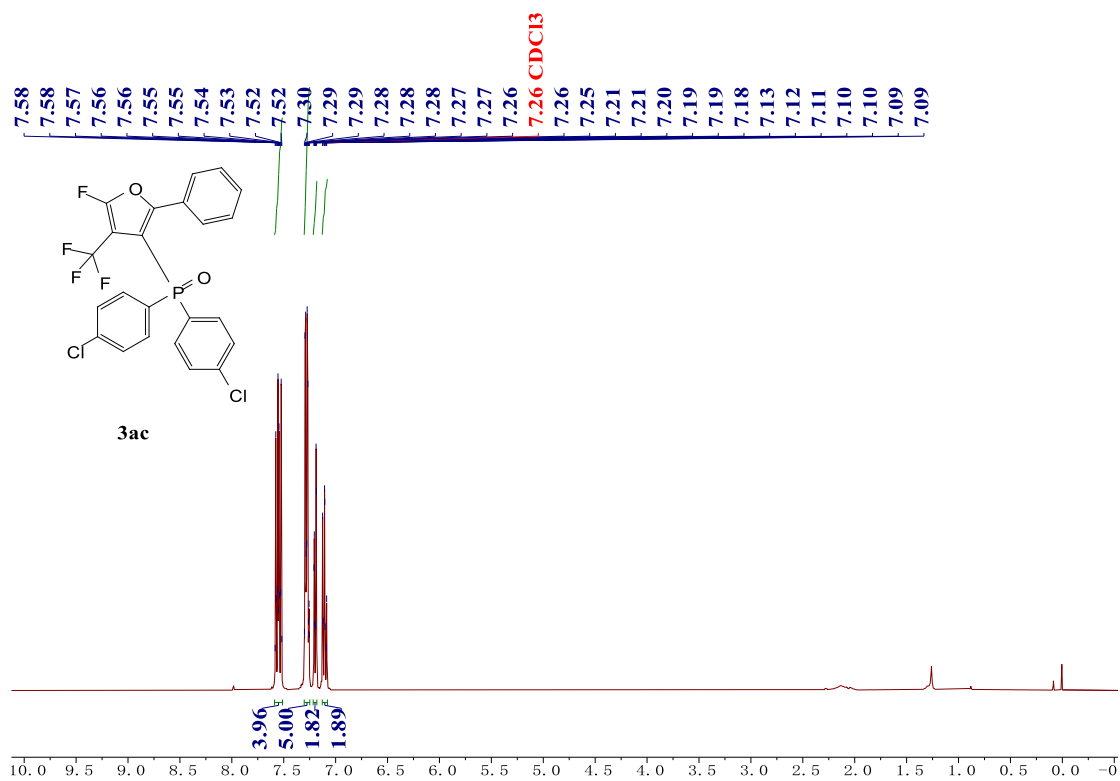

$^{19}\text{F}$  NMR spectra of the product **3ac** (376 MHz,  $\text{CDCl}_3$ ):

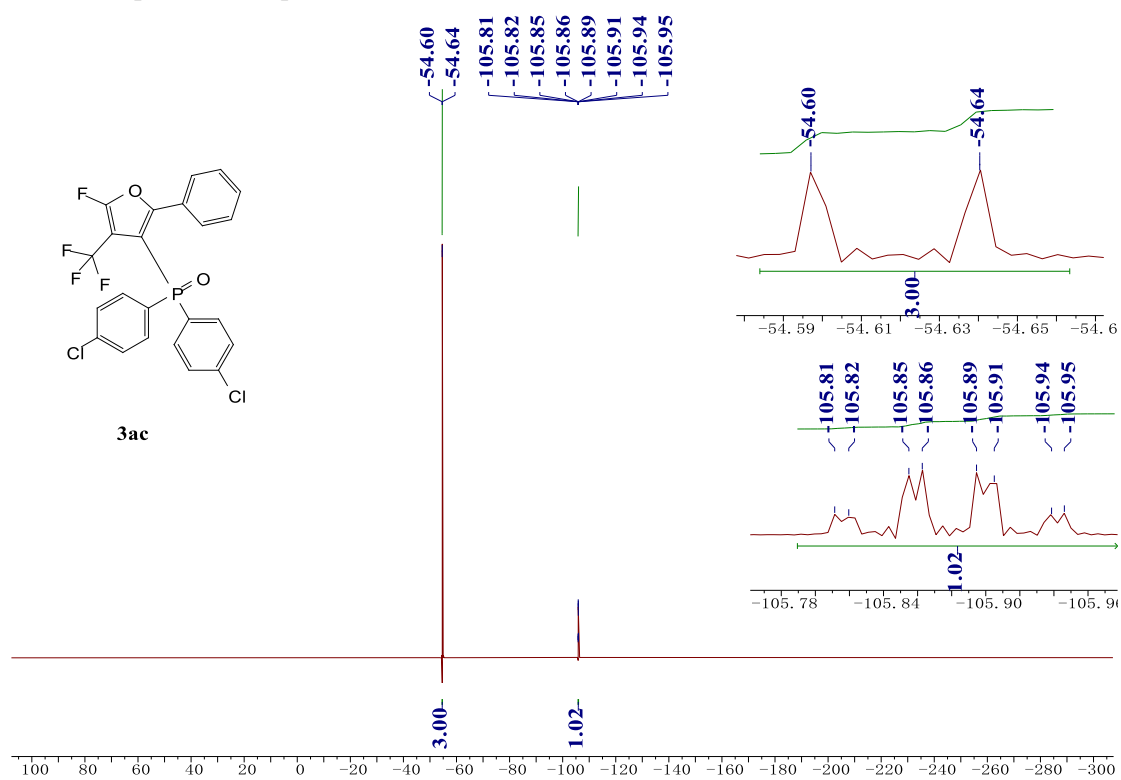

$^{31}\text{P}$  NMR spectra of the product **3ac** (162 MHz,  $\text{CDCl}_3$ ):

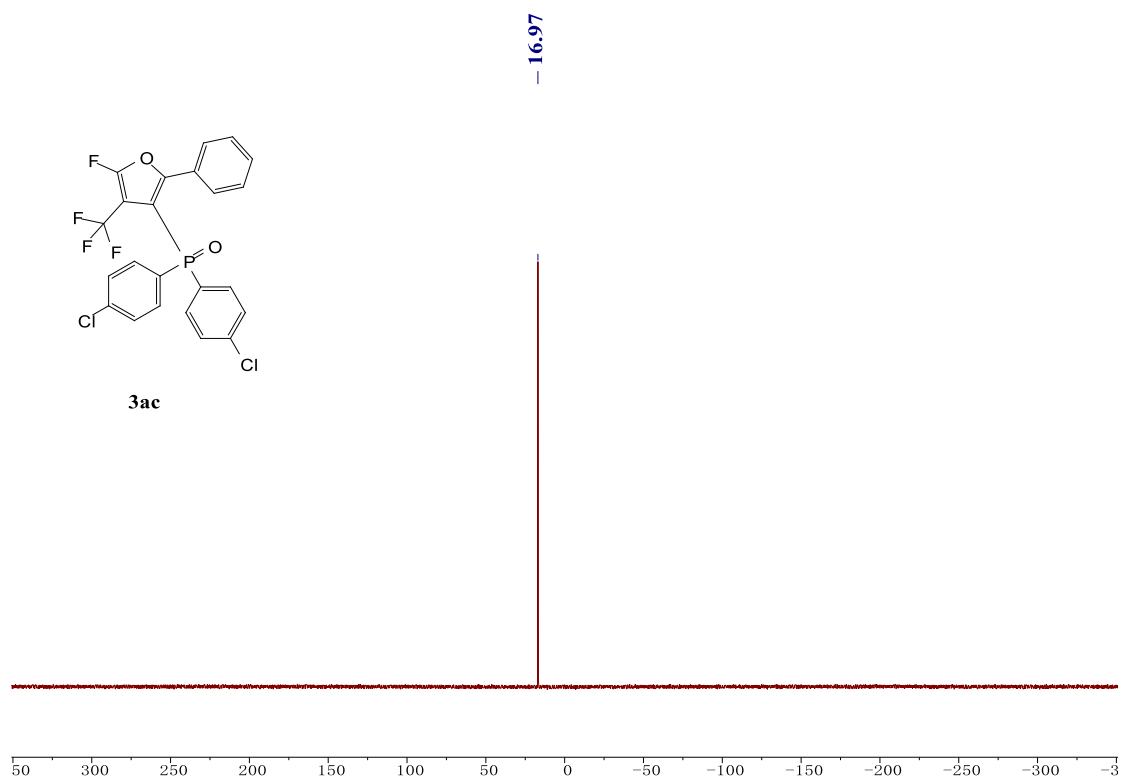

$^{13}\text{C}$  NMR spectra of the product **3ac** (100 MHz,  $\text{CDCl}_3$ ):

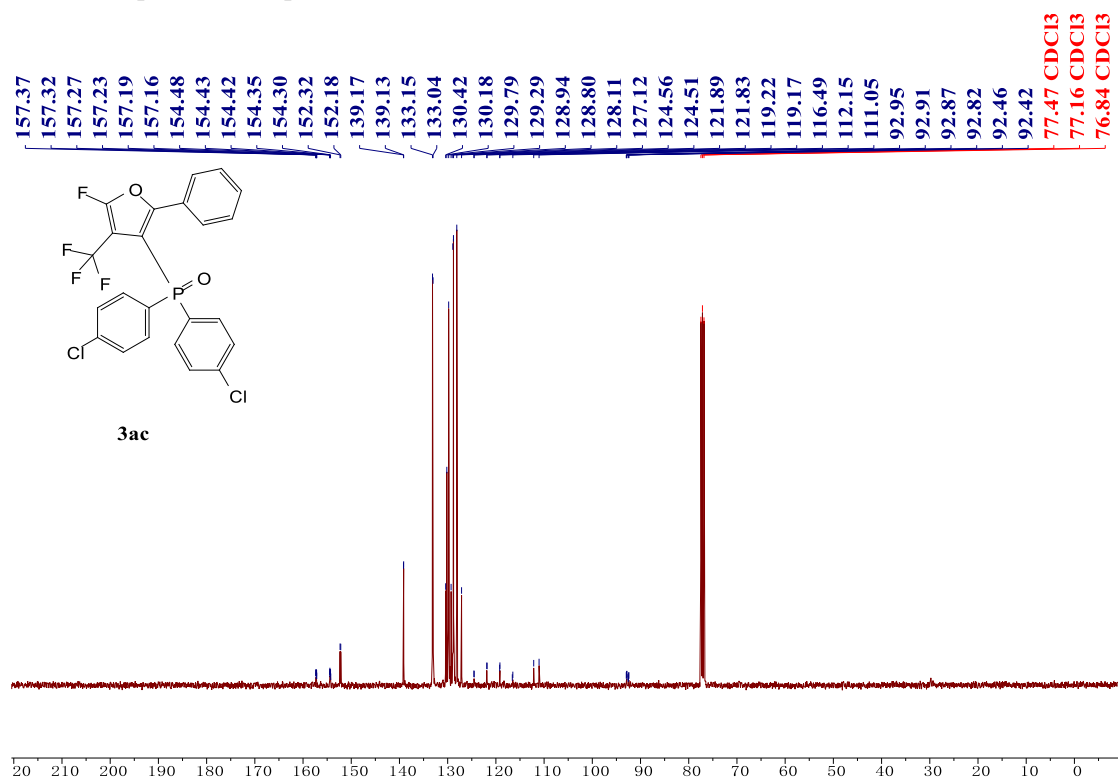

$^1\text{H}$  NMR spectra of the product **3ad** (400 MHz,  $\text{CDCl}_3$ ):

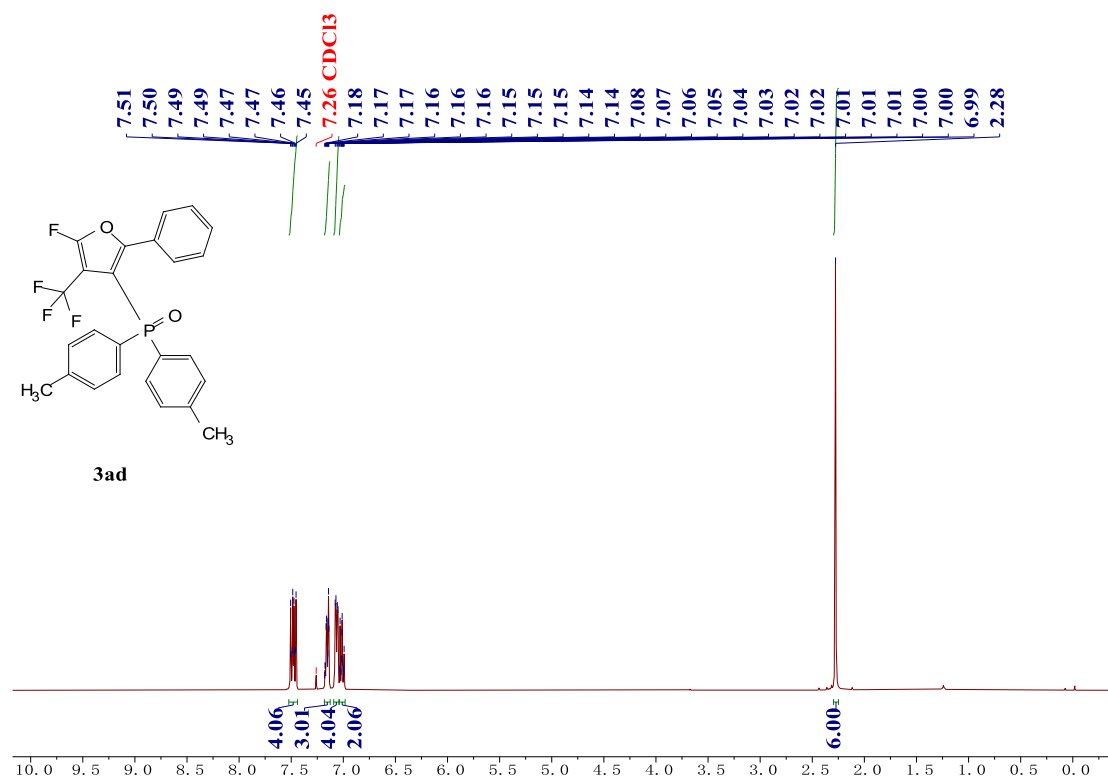

$^{19}\text{F}$  NMR spectra of the product **3ad** (376 MHz,  $\text{CDCl}_3$ ):

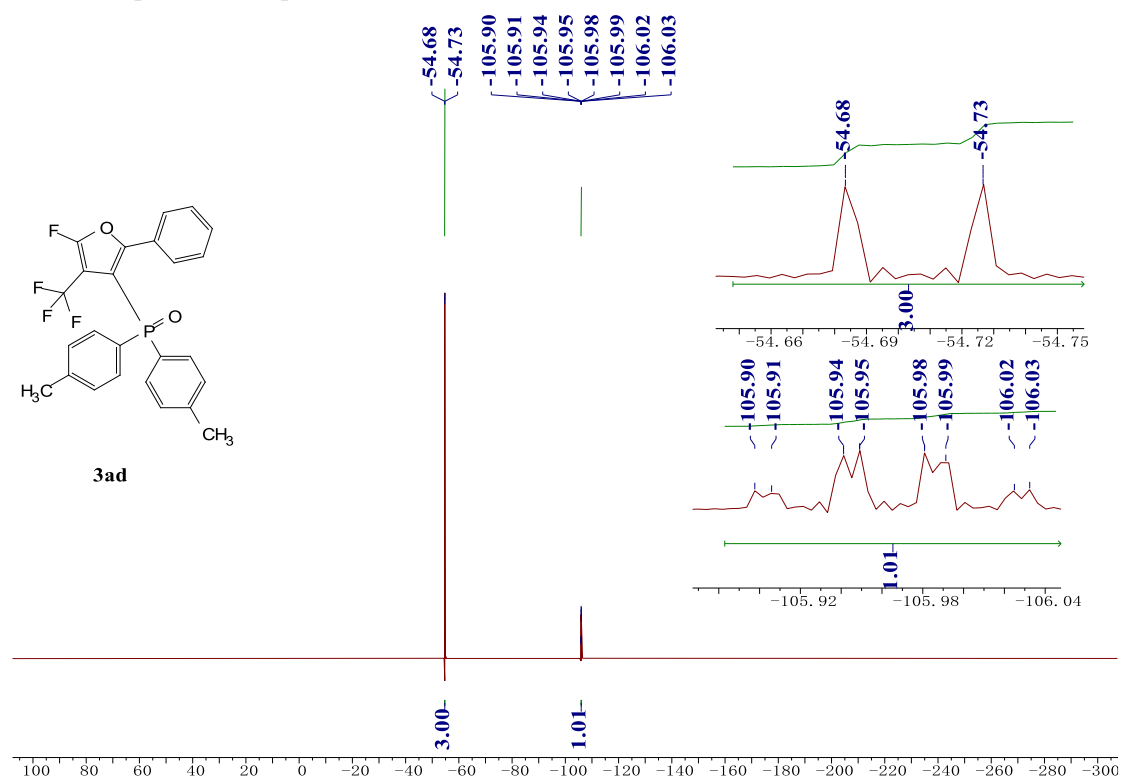

$^{31}\text{P}$  NMR spectra of the product **3ad** (162 MHz,  $\text{CDCl}_3$ ):

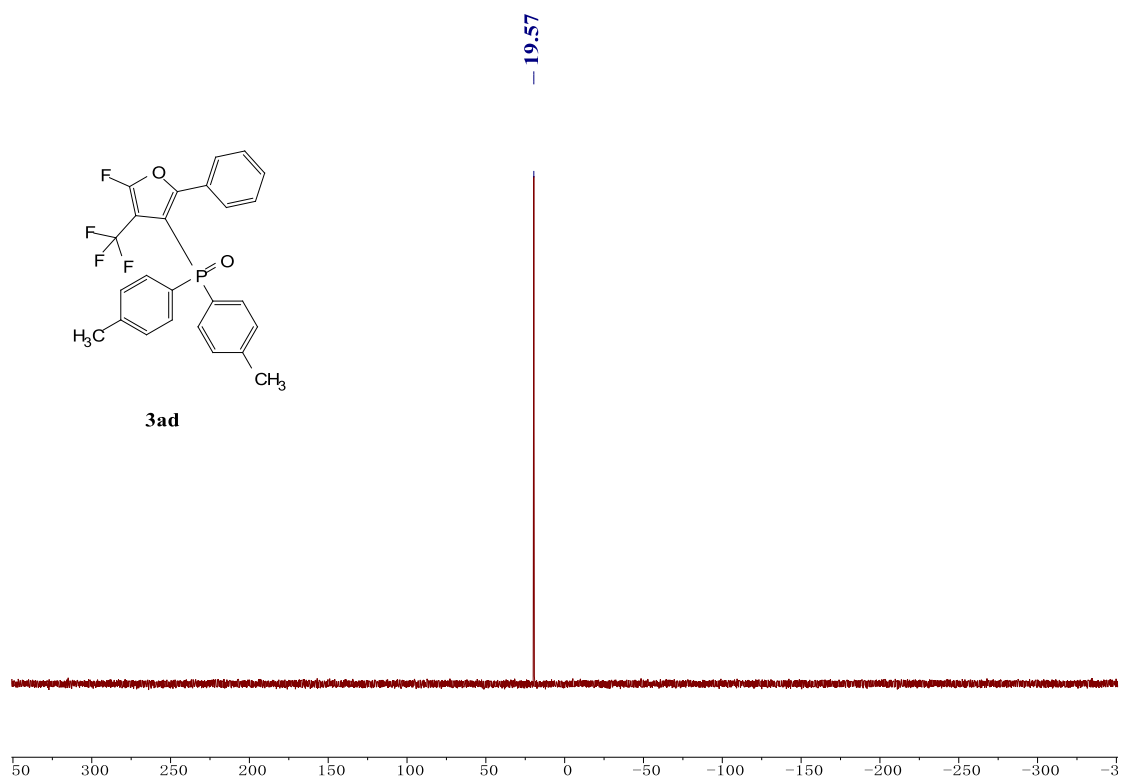

$^{13}\text{C}$  NMR spectra of the product **3ad** (100 MHz,  $\text{CDCl}_3$ ):

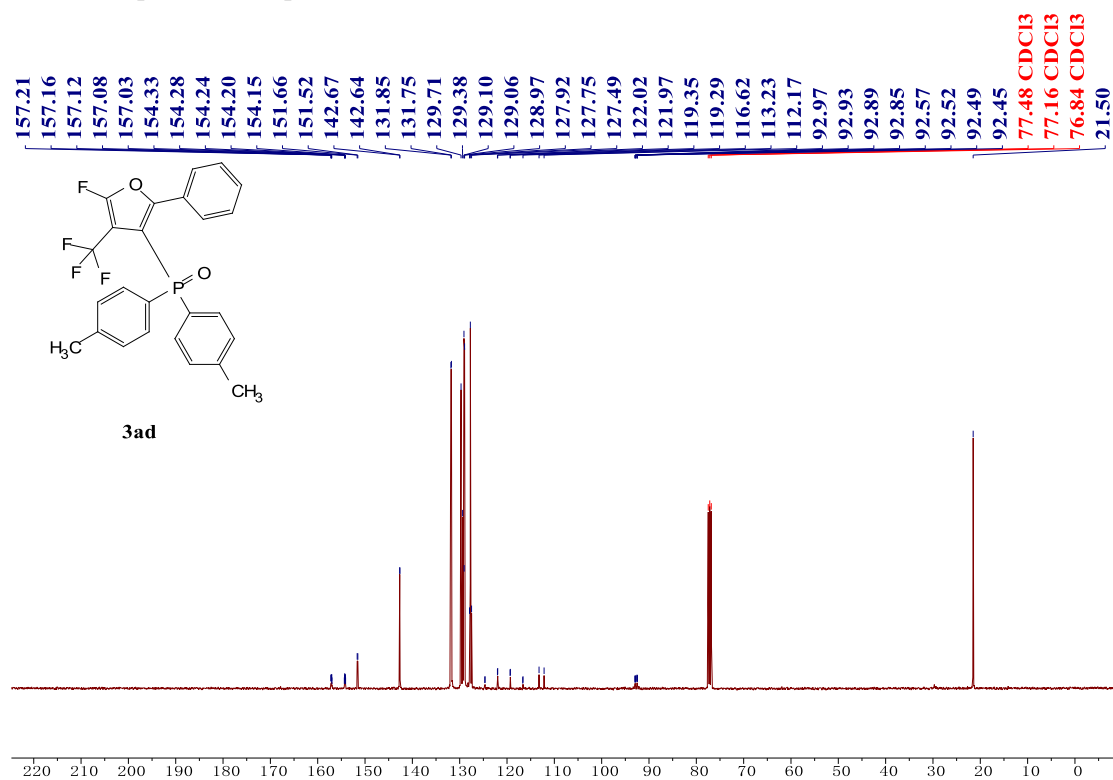

$^1\text{H}$  NMR spectra of the product **3ae** (400 MHz,  $\text{CDCl}_3$ ):

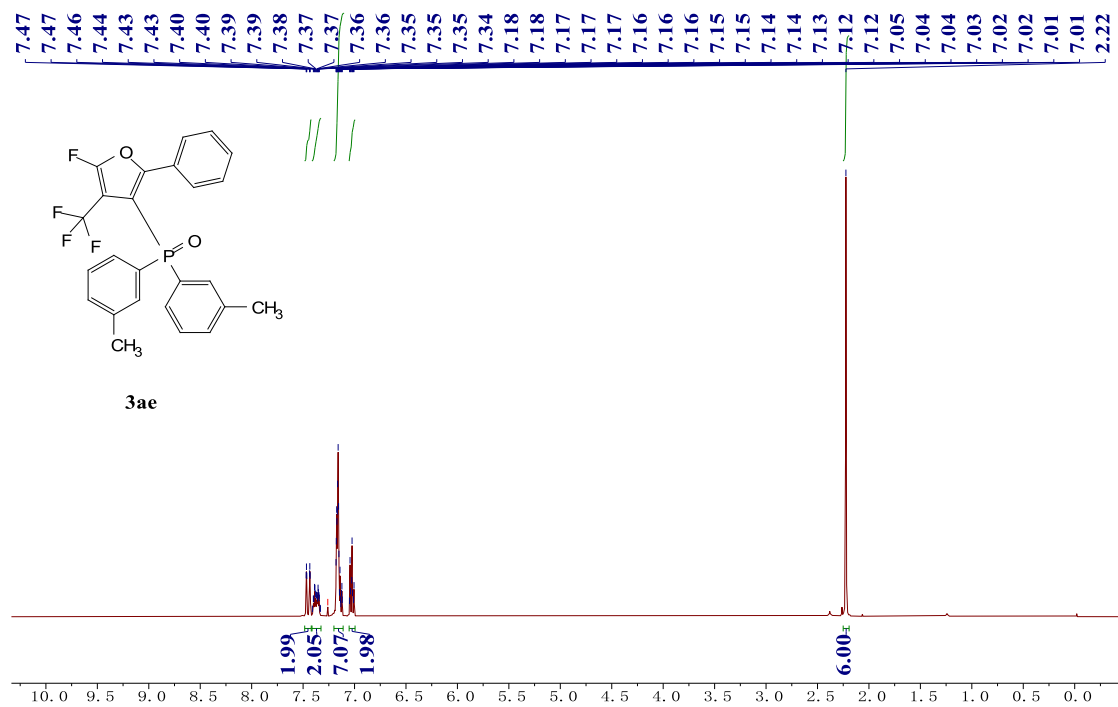

$^{19}\text{F}$  NMR spectra of the product **3ae** (376 MHz,  $\text{CDCl}_3$ ):

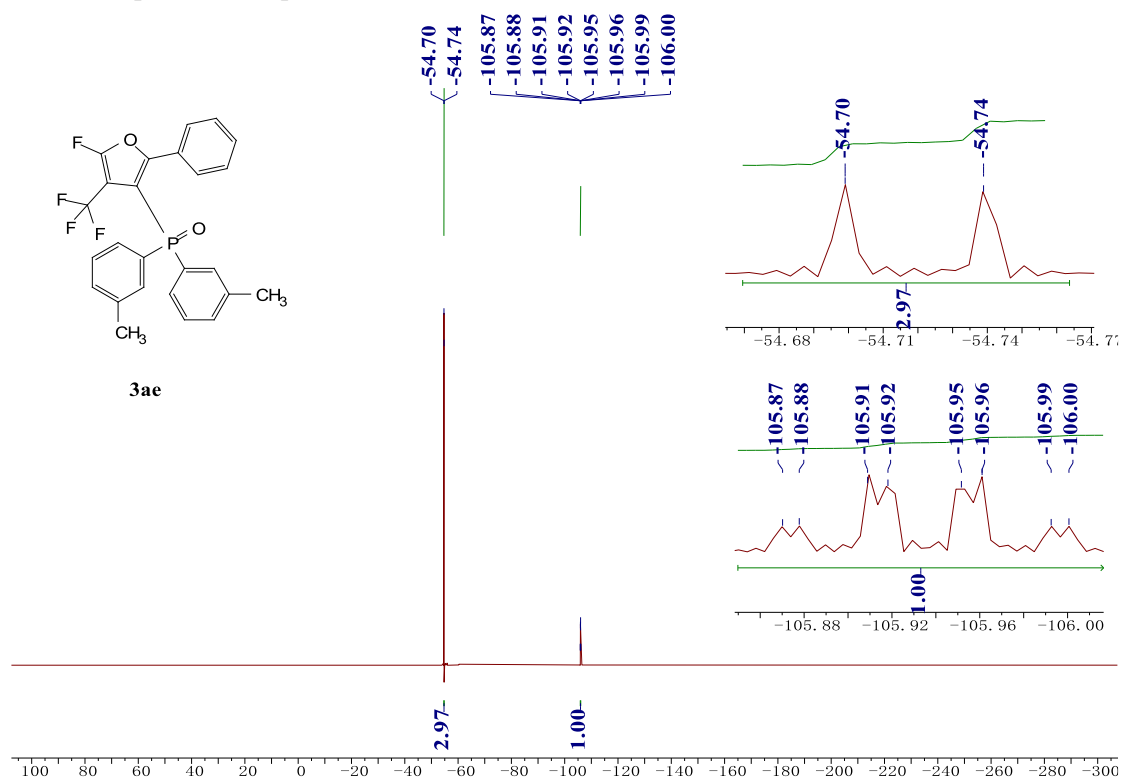

$^{31}\text{P}$  NMR spectra of the product **3ae** (162 MHz,  $\text{CDCl}_3$ ):

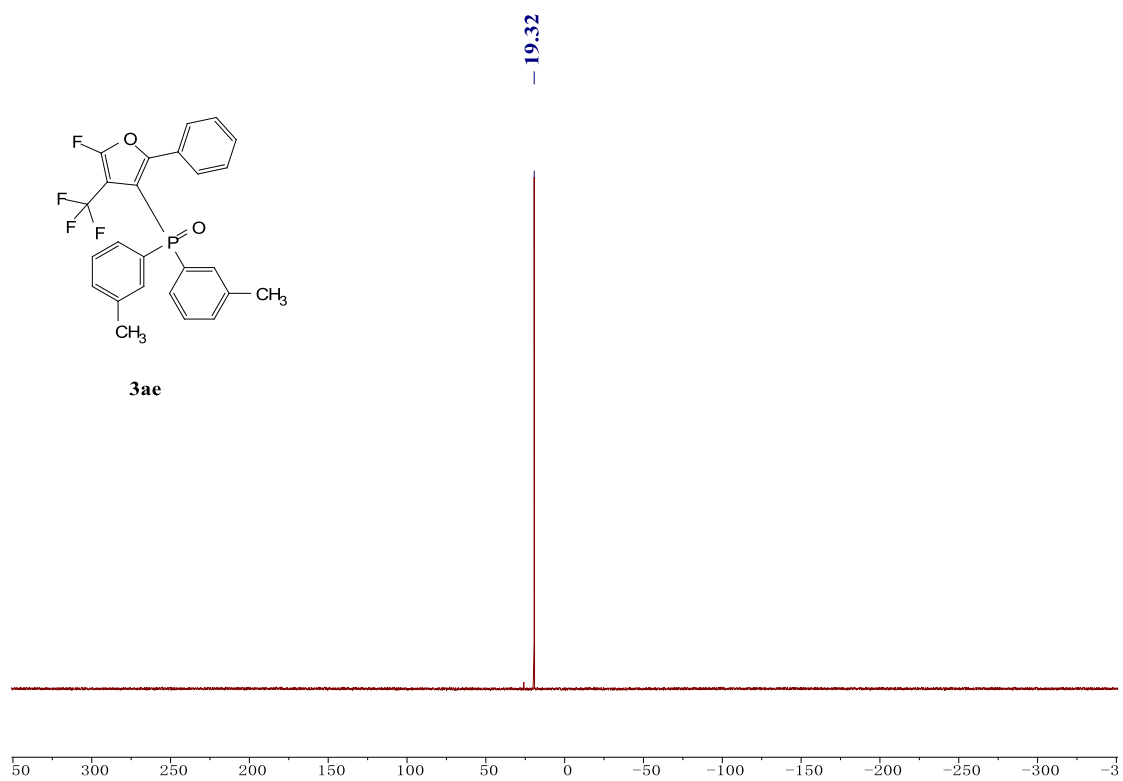

$^{13}\text{C}$  NMR spectra of the product **3ae** (100 MHz,  $\text{CDCl}_3$ ):

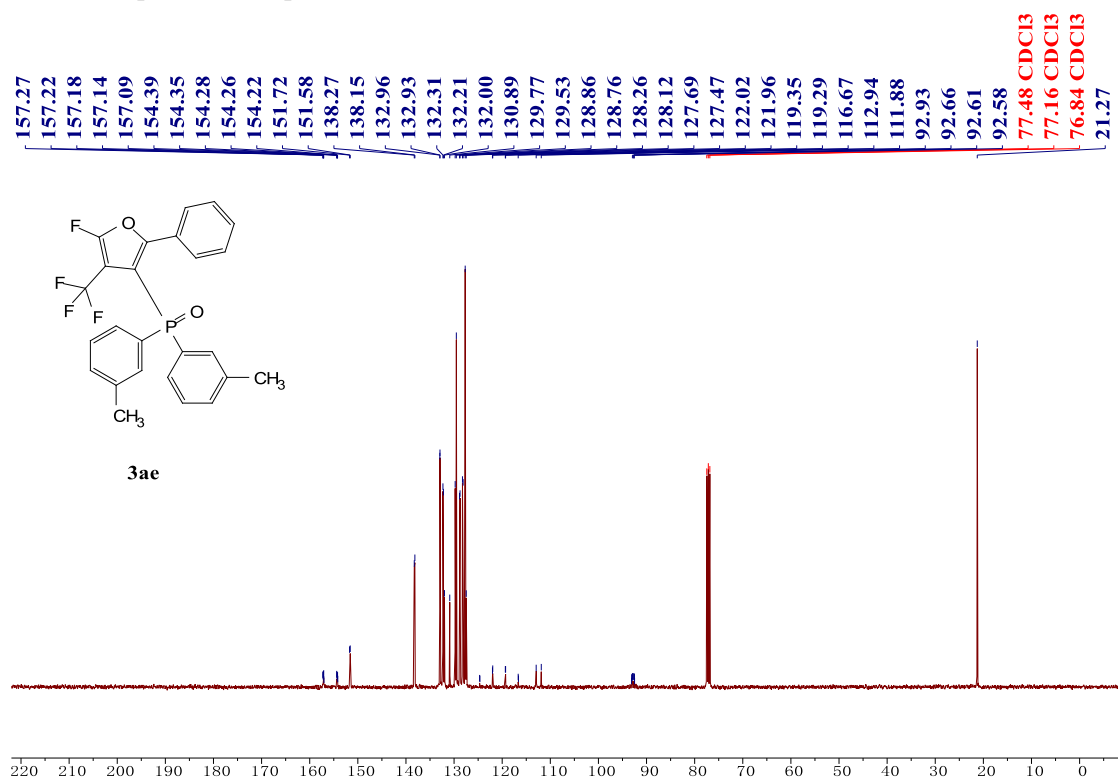

$^1\text{H}$  NMR spectra of the product **3af** (400 MHz,  $\text{CDCl}_3$ ):

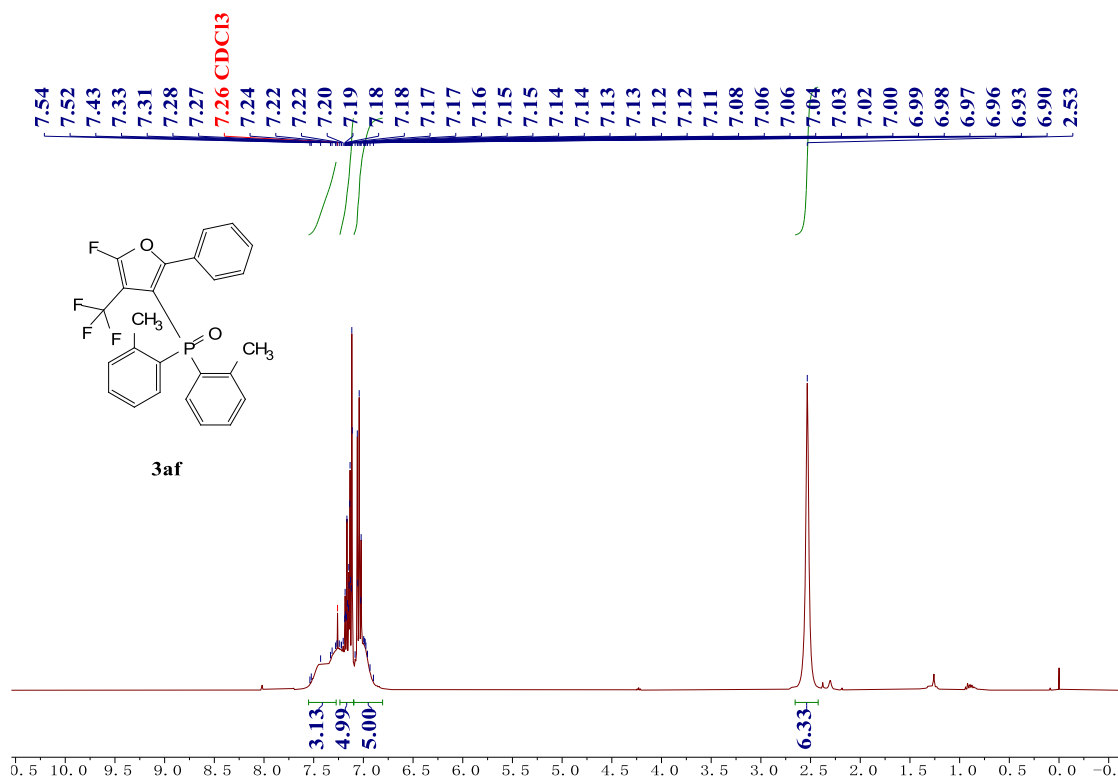

$^{19}\text{F}$  NMR spectra of the product **3af** (376 MHz,  $\text{CDCl}_3$ ):

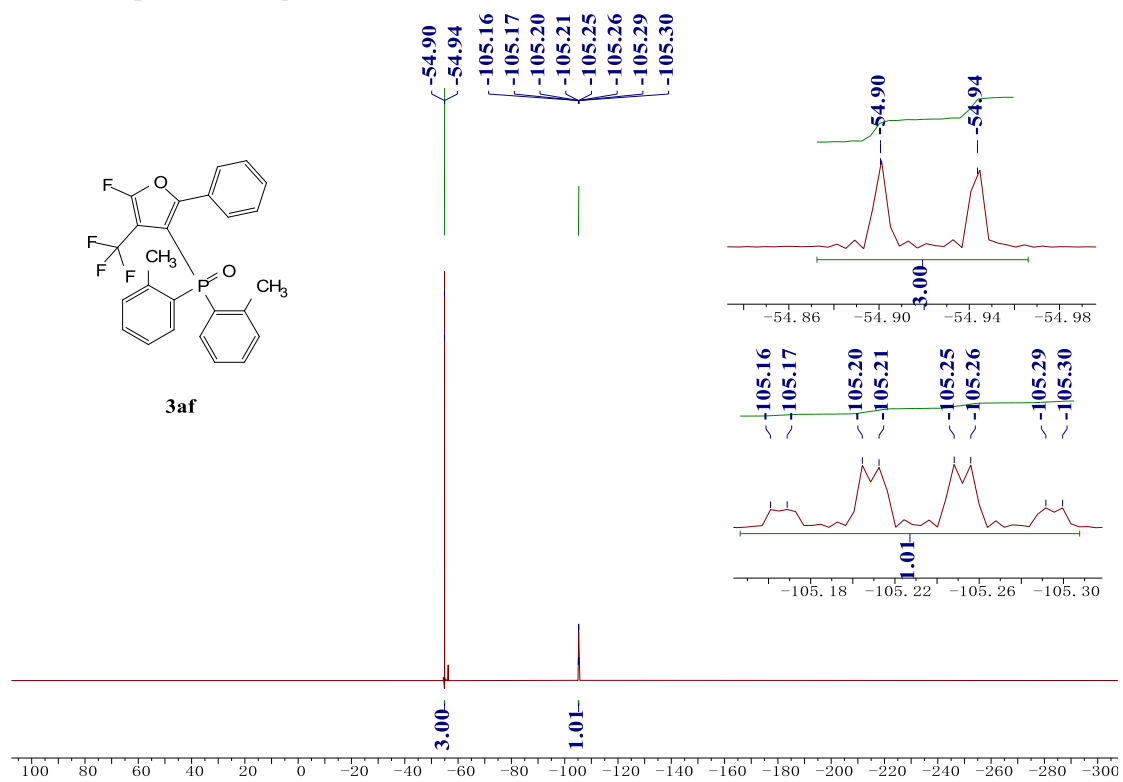

$^{31}\text{P}$  NMR spectra of the product **3af** (162 MHz,  $\text{CDCl}_3$ ):

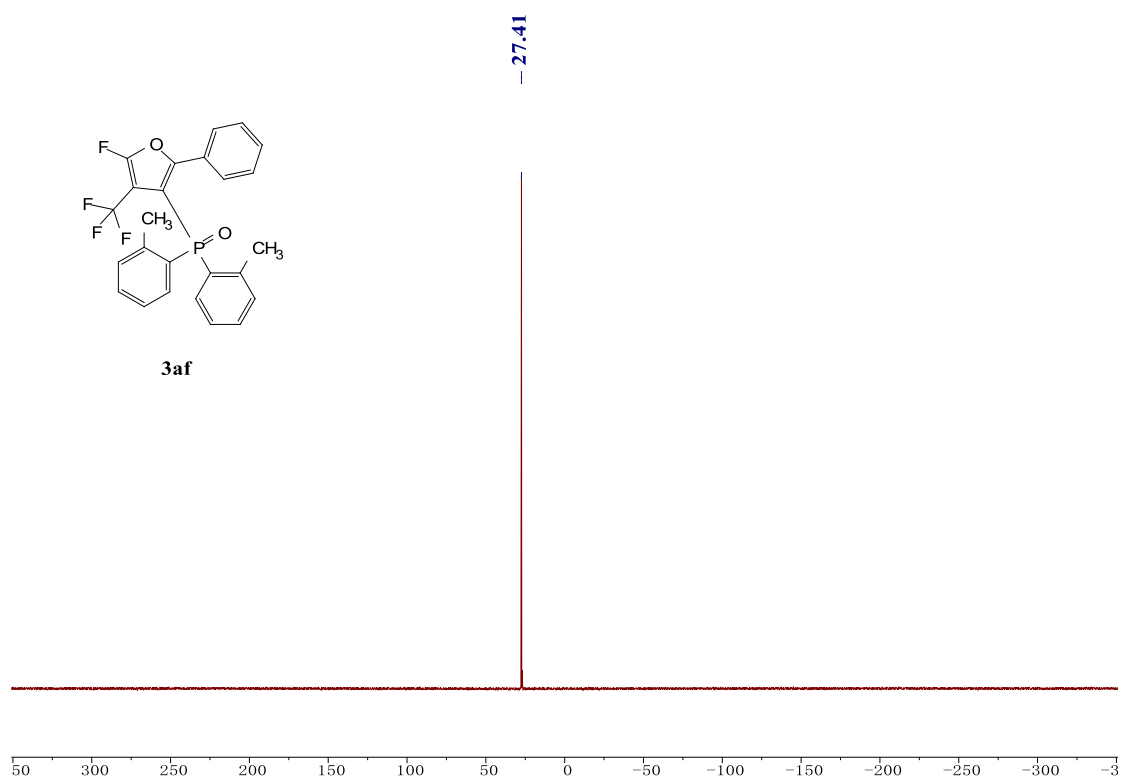

$^{13}\text{C}$  NMR spectra of the product **3af** (100 MHz,  $\text{CDCl}_3$ ):

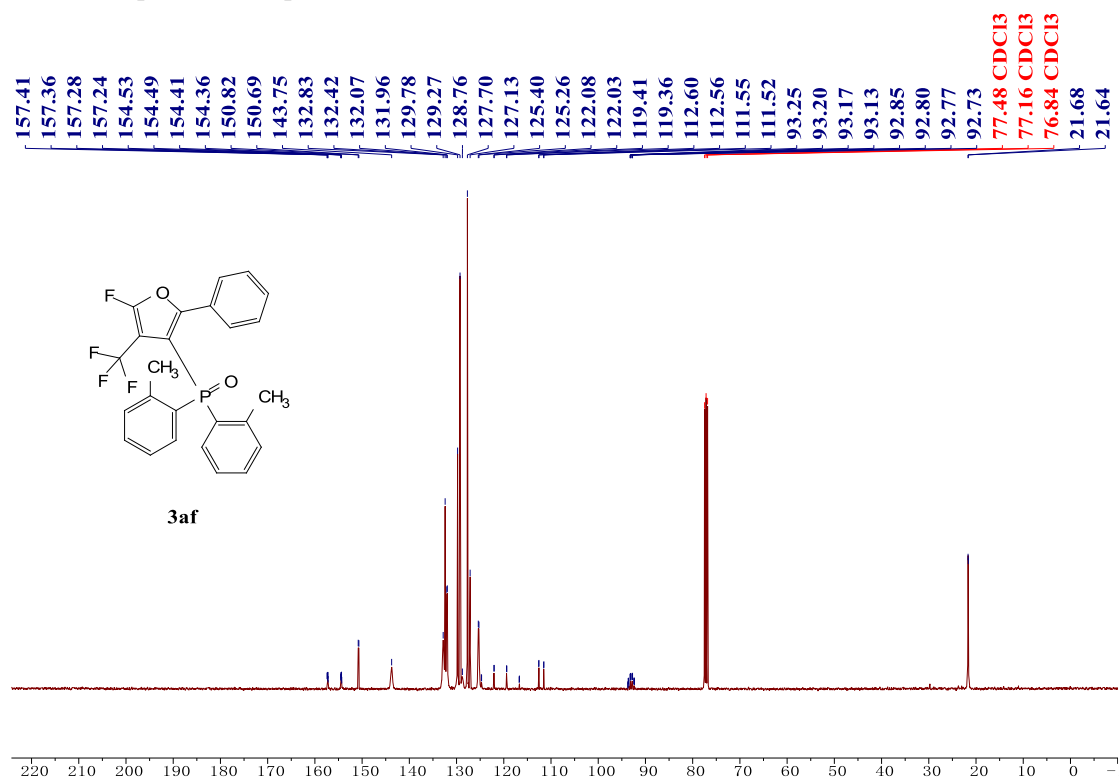



$^1\text{H}$  NMR spectra of the product **3ag** (400 MHz,  $\text{CDCl}_3$ ):

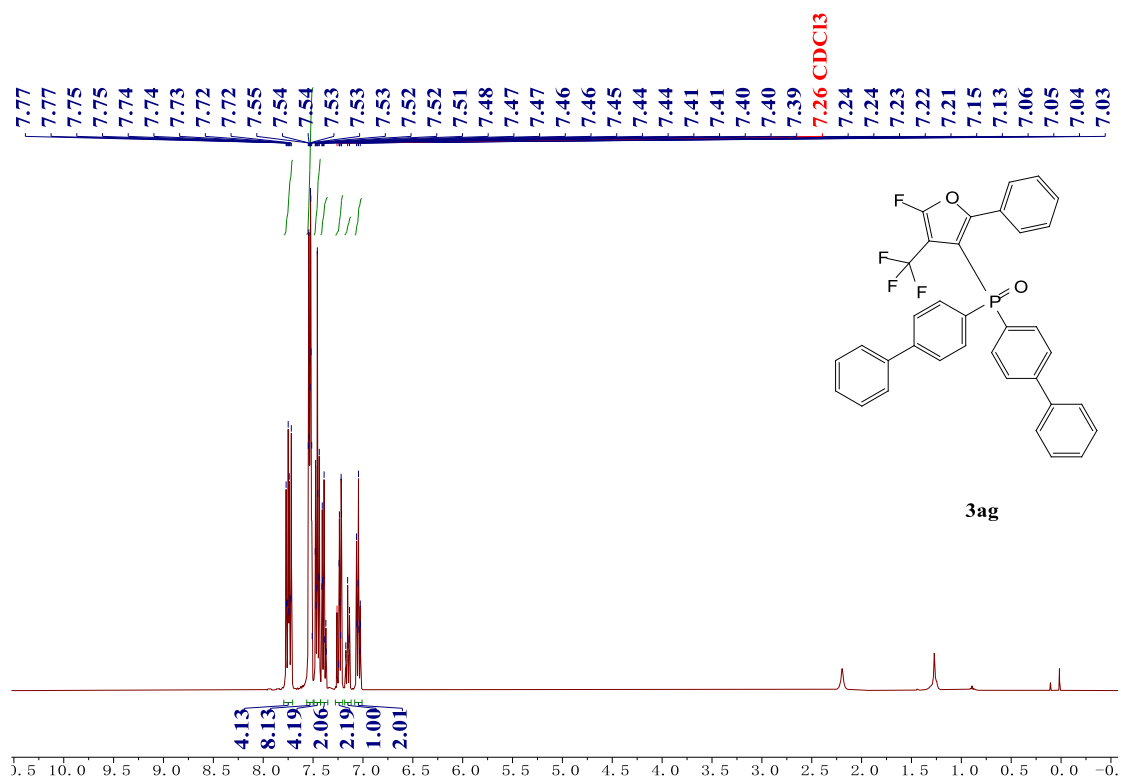

$^{19}\text{F}$  NMR spectra of the product **3ag** (376 MHz,  $\text{CDCl}_3$ ):

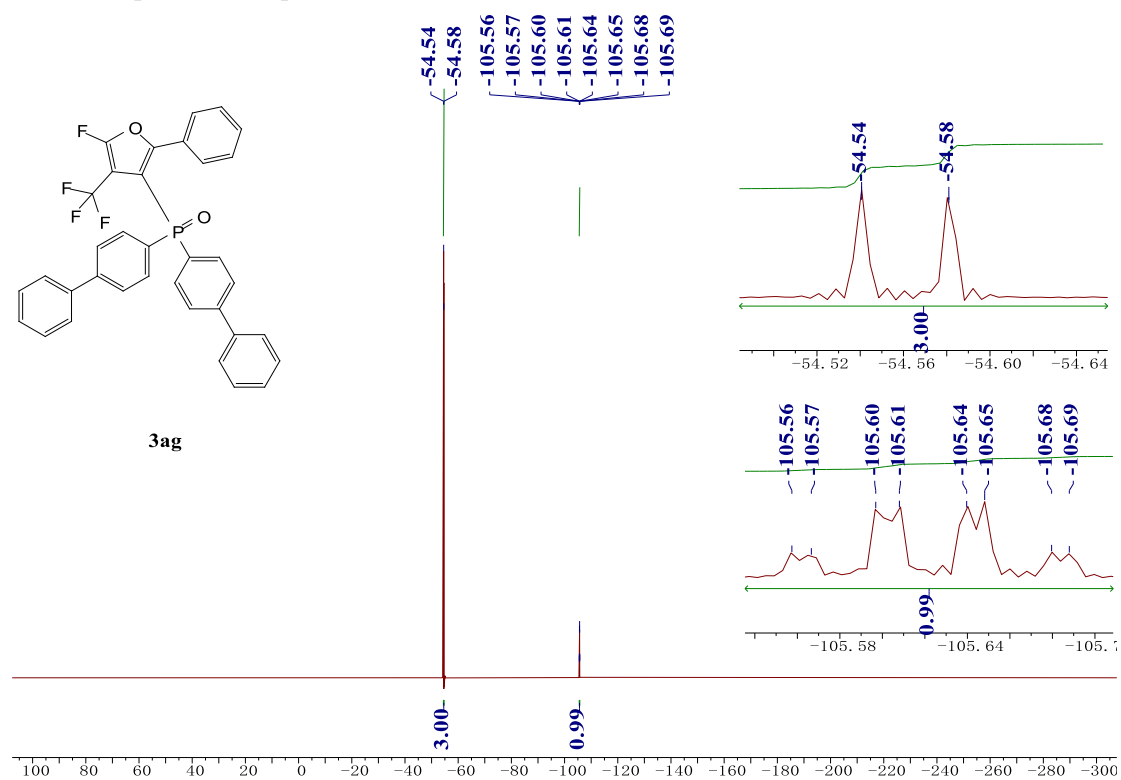

$^{31}\text{P}$  NMR spectra of the product **3ag** (162 MHz,  $\text{CDCl}_3$ ):

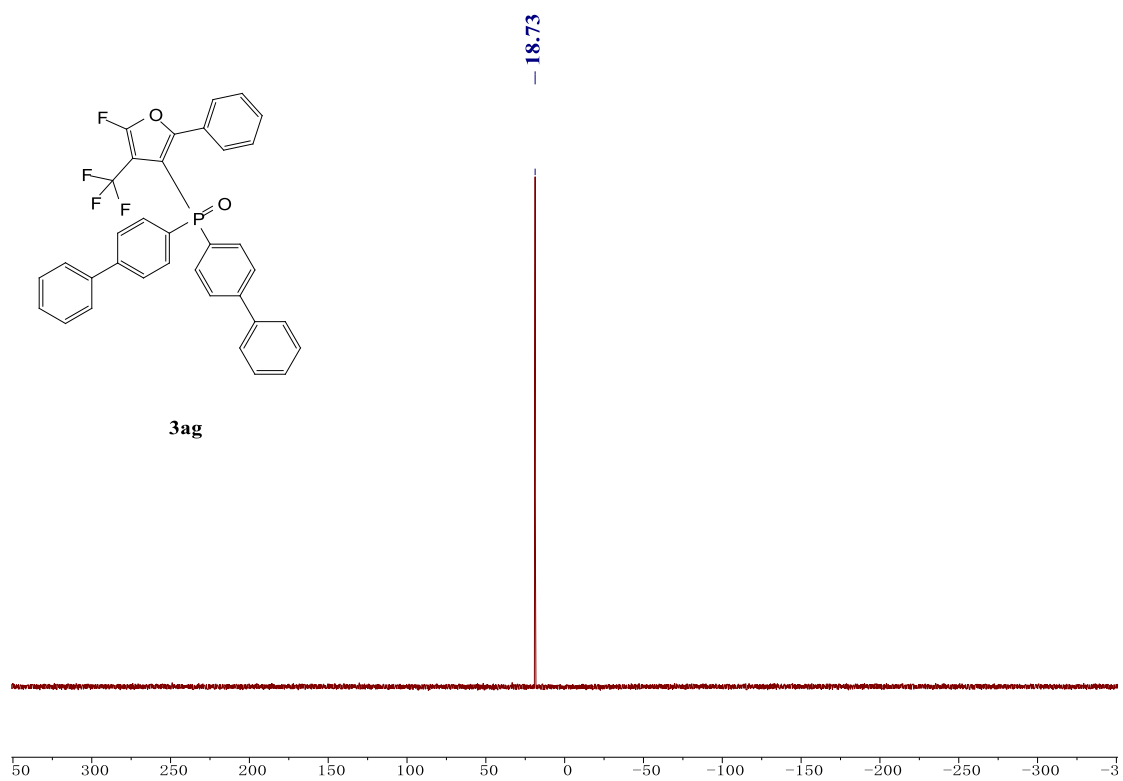

$^{13}\text{C}$  NMR spectra of the product **3ag** (100 MHz,  $\text{CDCl}_3$ ):

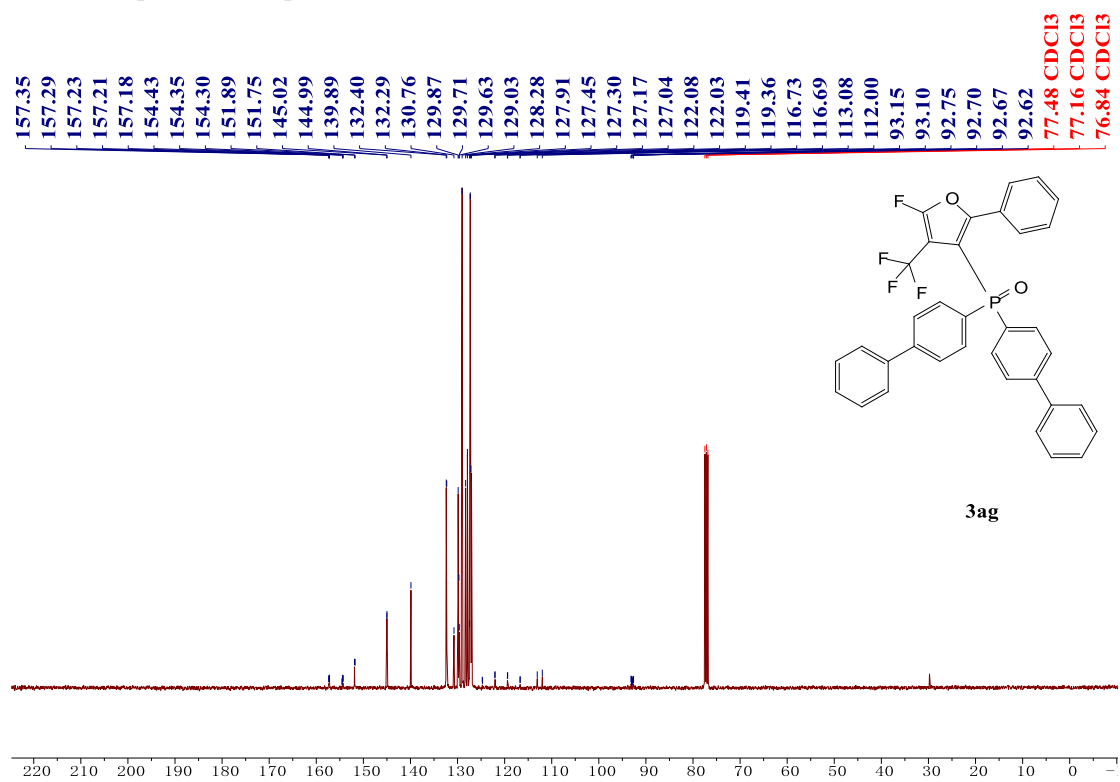

<sup>1</sup>H NMR spectra of the product **3ah** (400 MHz, CDCl<sub>3</sub>):

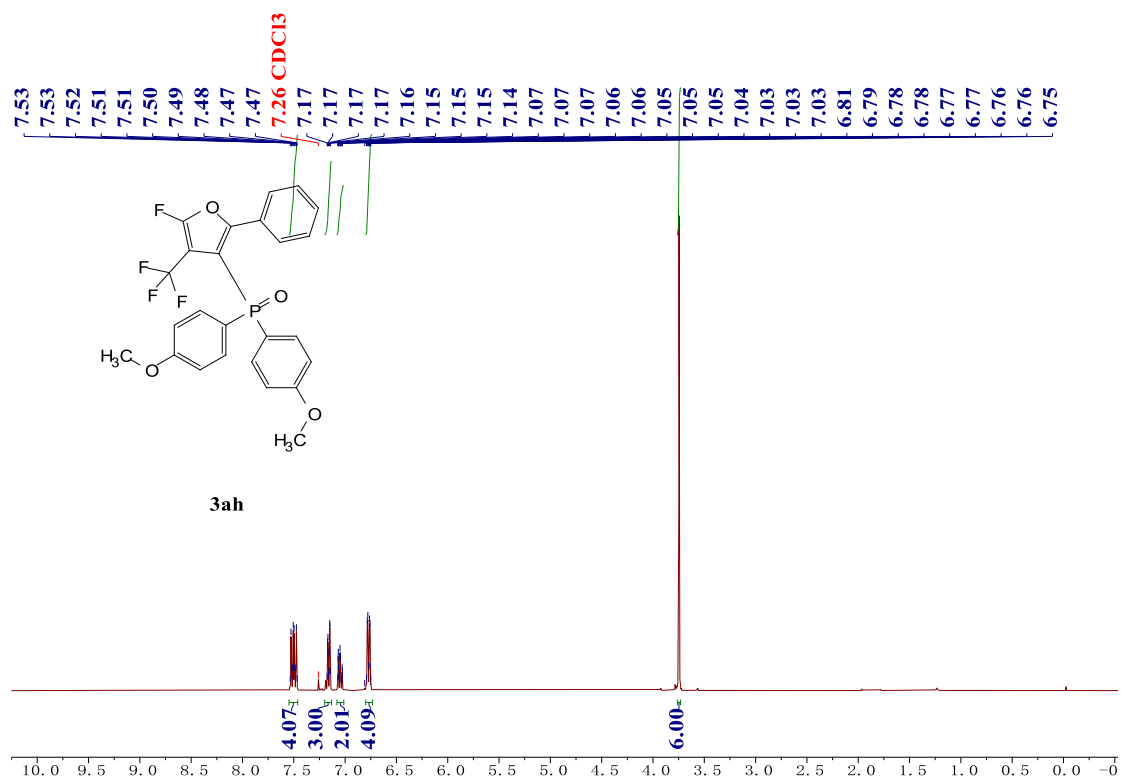

<sup>19</sup>F NMR spectra of the product **3ah** (376 MHz, CDCl<sub>3</sub>):

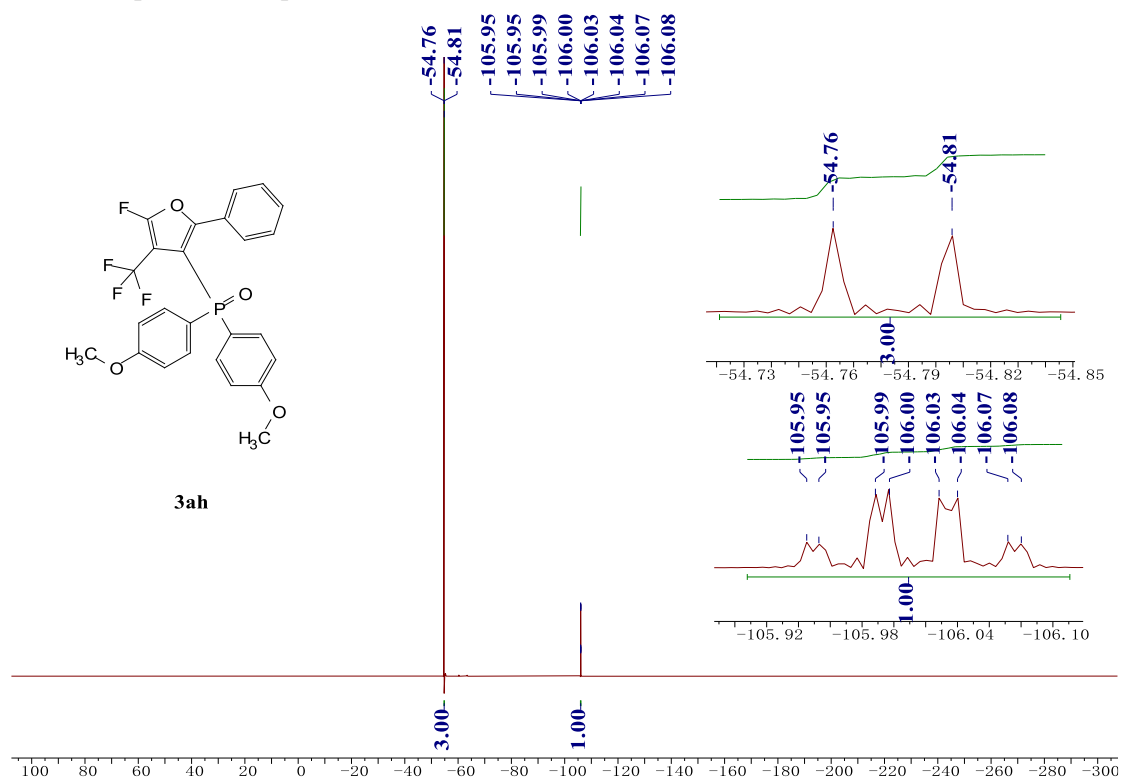

$^{31}\text{P}$  NMR spectra of the product **3ah** (162 MHz,  $\text{CDCl}_3$ ):

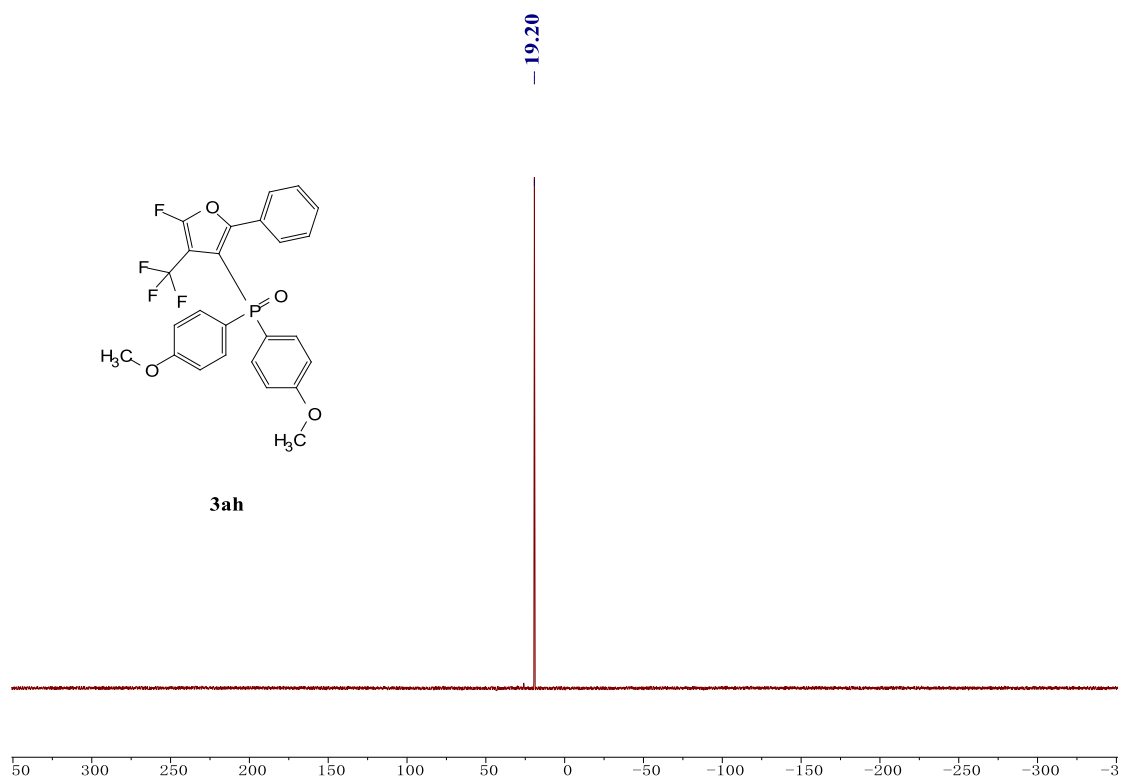

$^{13}\text{C}$  NMR spectra of the product **3ah** (100 MHz,  $\text{CDCl}_3$ ):

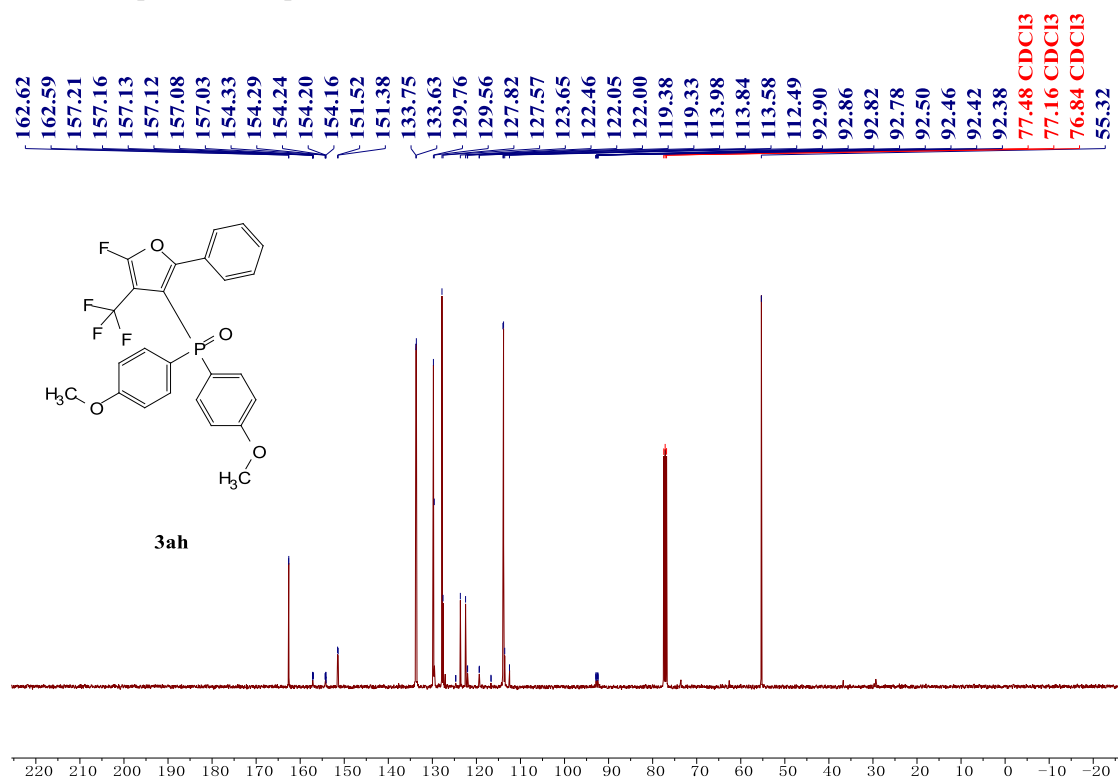

$^1\text{H}$  NMR spectra of the product **3ai** (400 MHz,  $\text{CDCl}_3$ ):

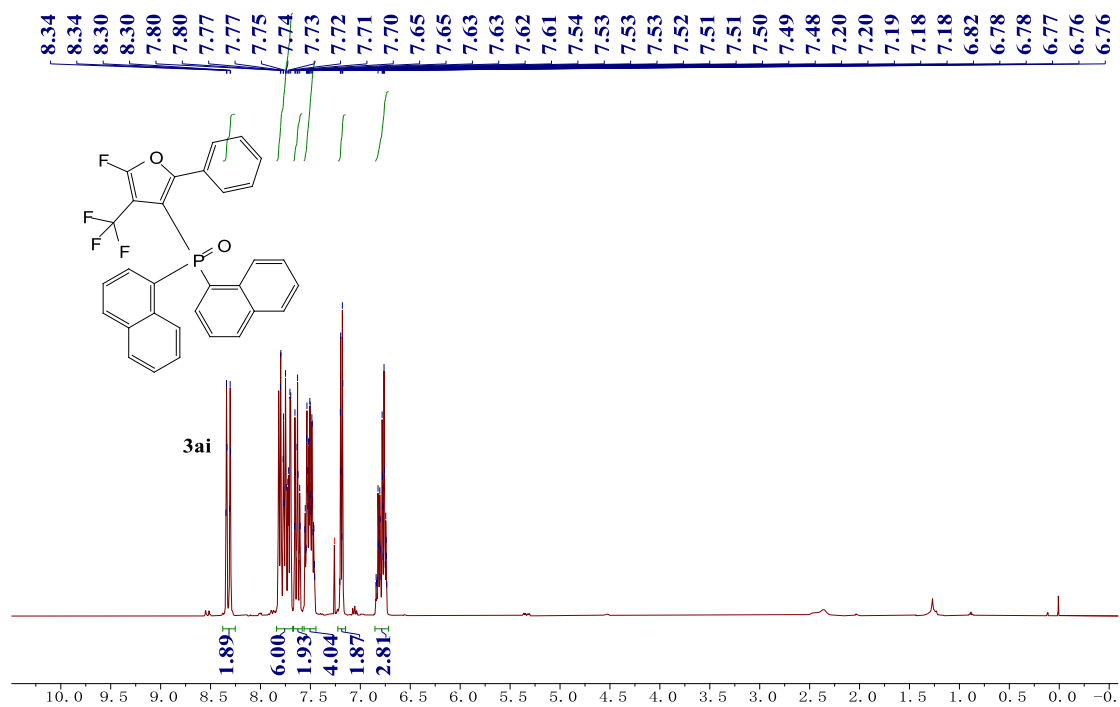

$^{19}\text{F}$  NMR spectra of the product **3ai** (376 MHz,  $\text{CDCl}_3$ ):

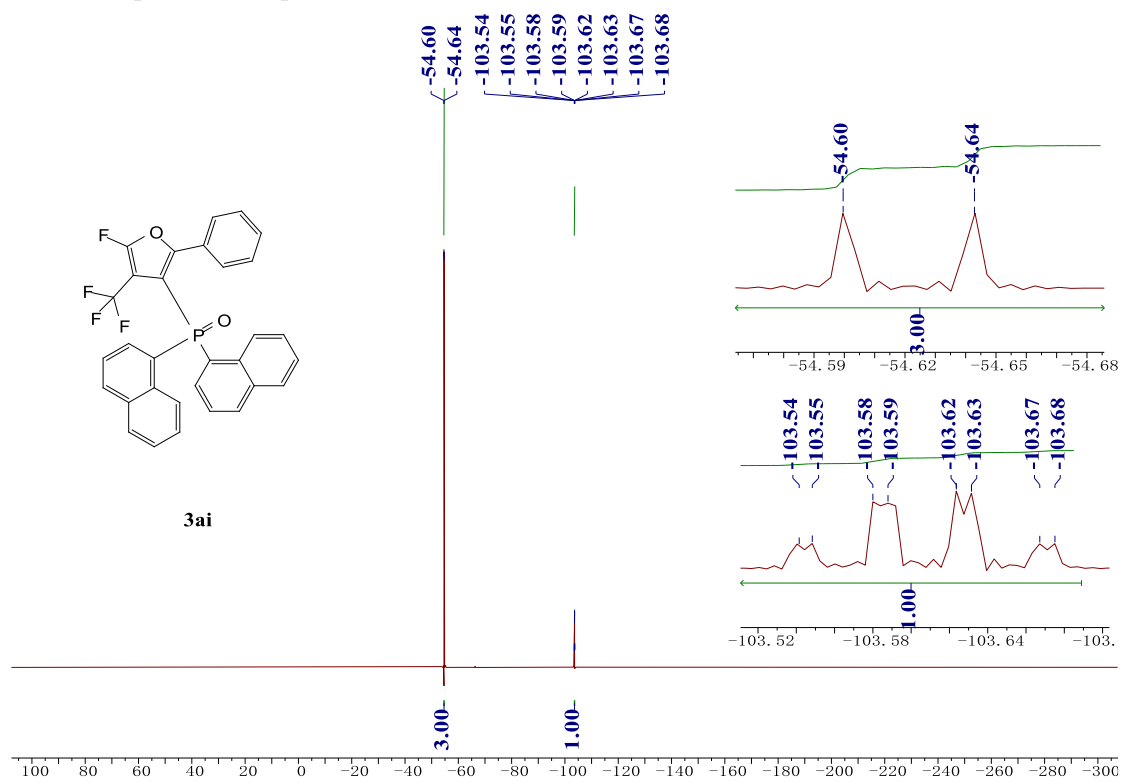

<sup>31</sup>P NMR spectra of the product **3ai** (162 MHz, CDCl<sub>3</sub>):

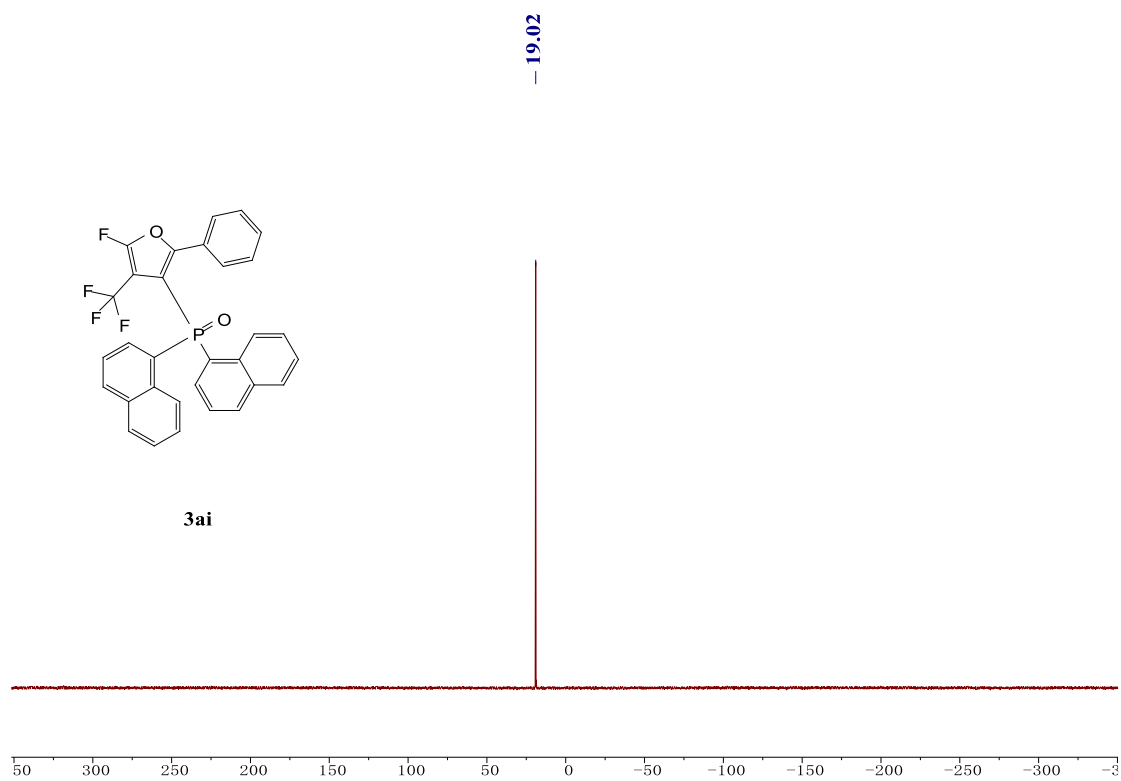

<sup>13</sup>C NMR spectra of the product **3ai** (100 MHz, CDCl<sub>3</sub>):

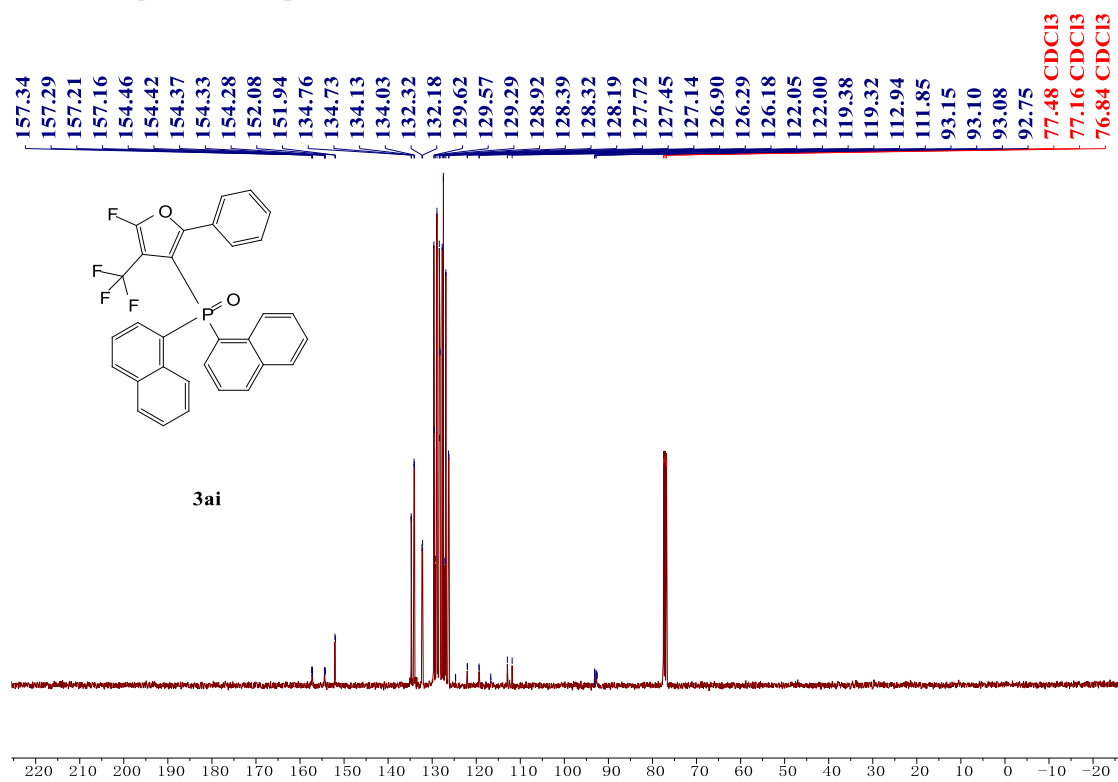

$^1\text{H}$  NMR spectra of the product **3aj** (400 MHz,  $\text{CDCl}_3$ ):

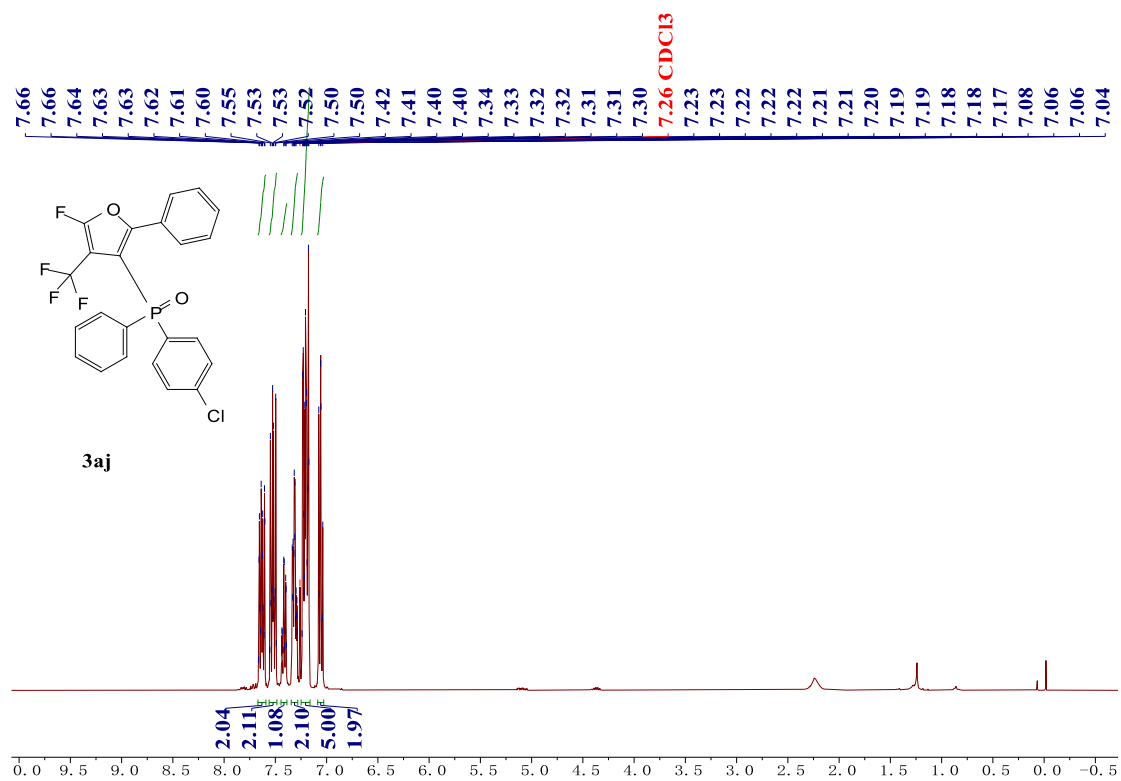

$^{19}\text{F}$  NMR spectra of the product **3aj** (376 MHz,  $\text{CDCl}_3$ ):

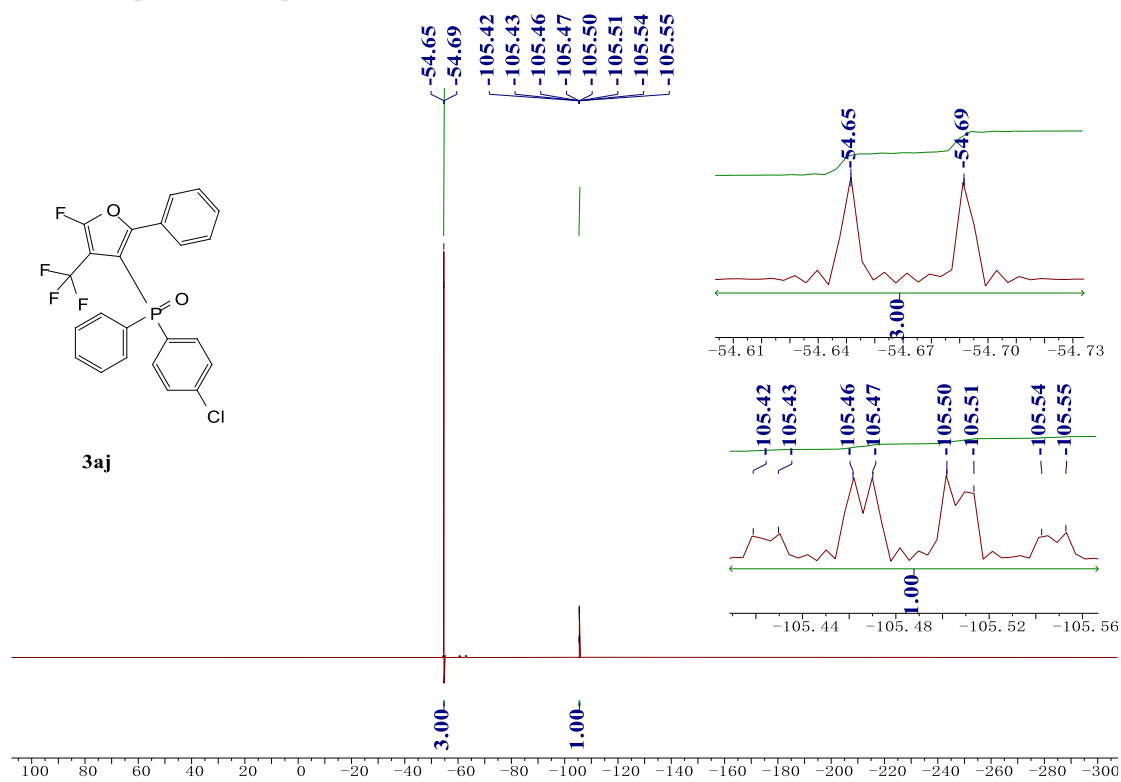

$^{31}\text{P}$  NMR spectra of the product **3aj** (162 MHz,  $\text{CDCl}_3$ ):

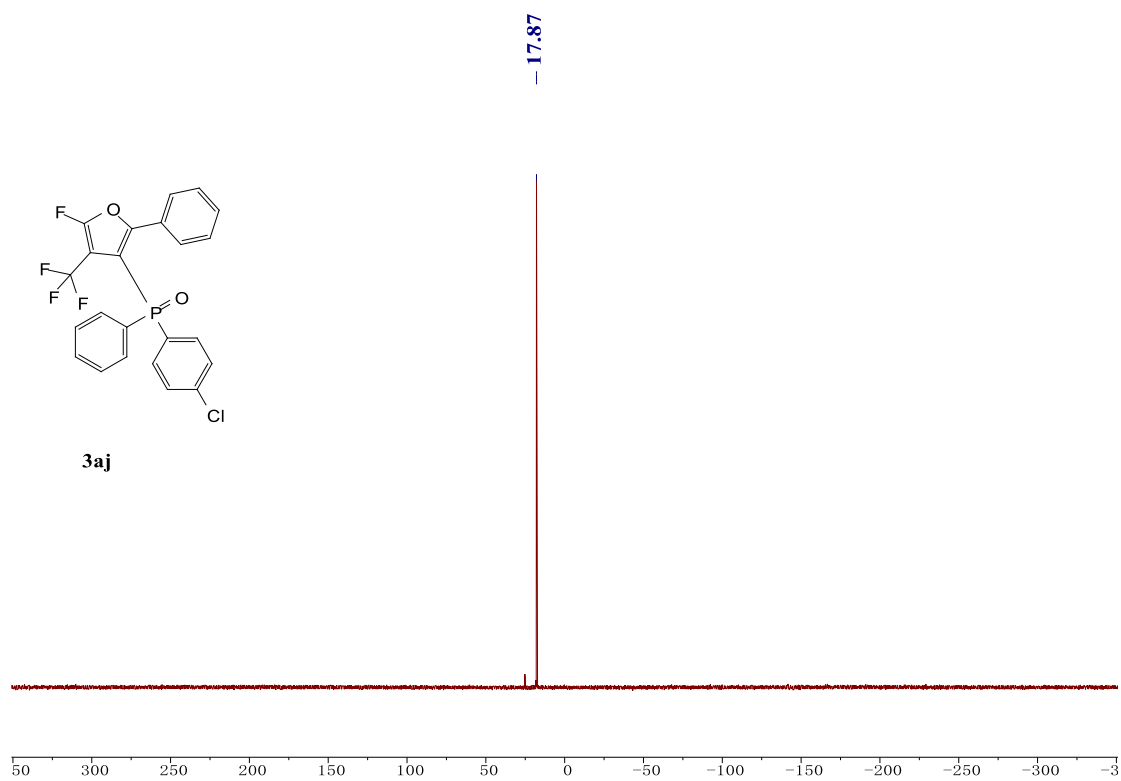

$^{13}\text{C}$  NMR spectra of the product **3aj** (100 MHz,  $\text{CDCl}_3$ ):

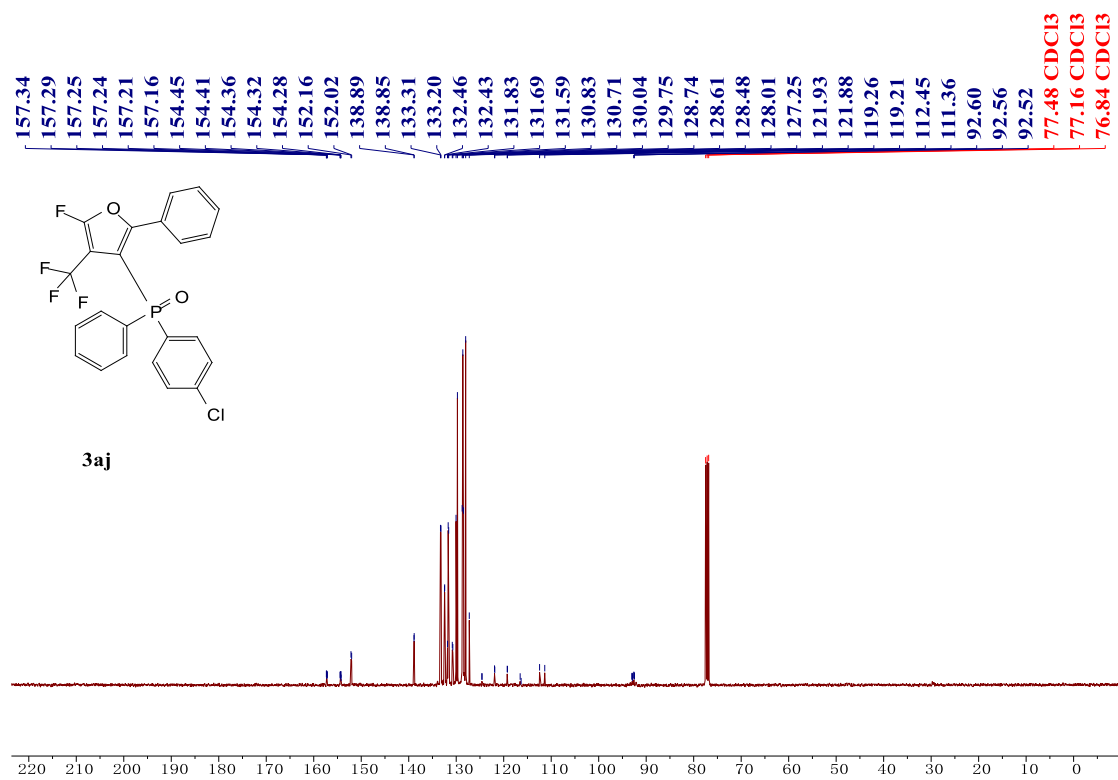



$^1\text{H}$  NMR spectra of the product **3ak** (400 MHz,  $\text{CDCl}_3$ ):

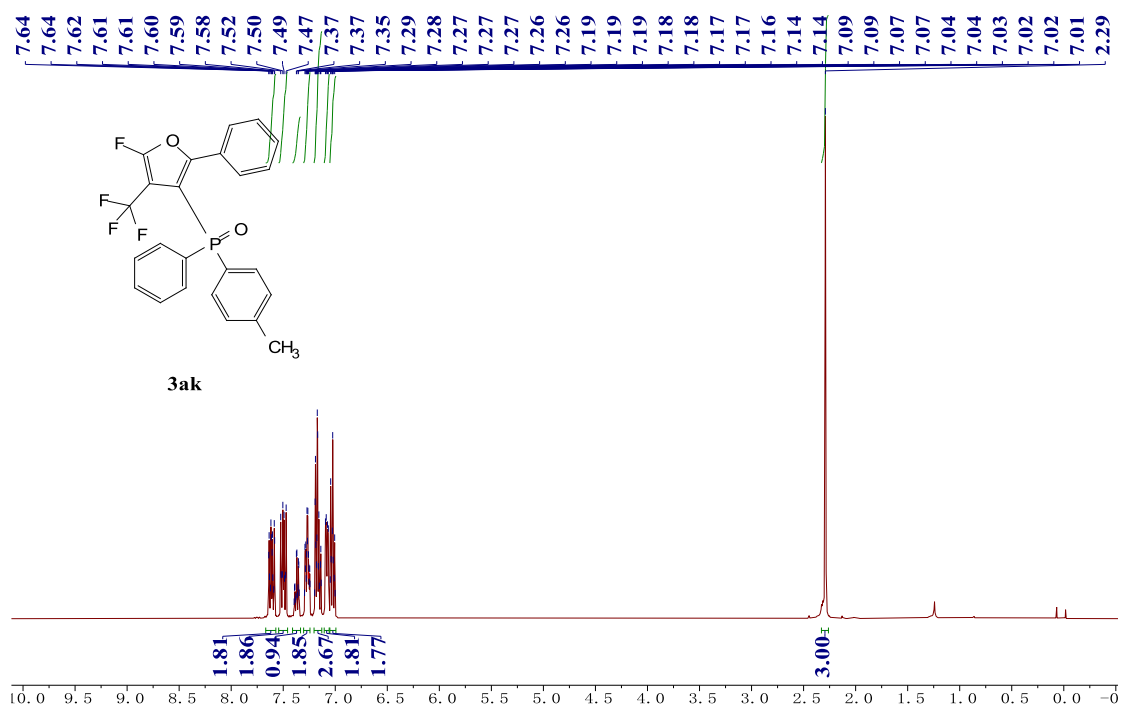

$^{19}\text{F}$  NMR spectra of the product **3ak** (376 MHz,  $\text{CDCl}_3$ ):

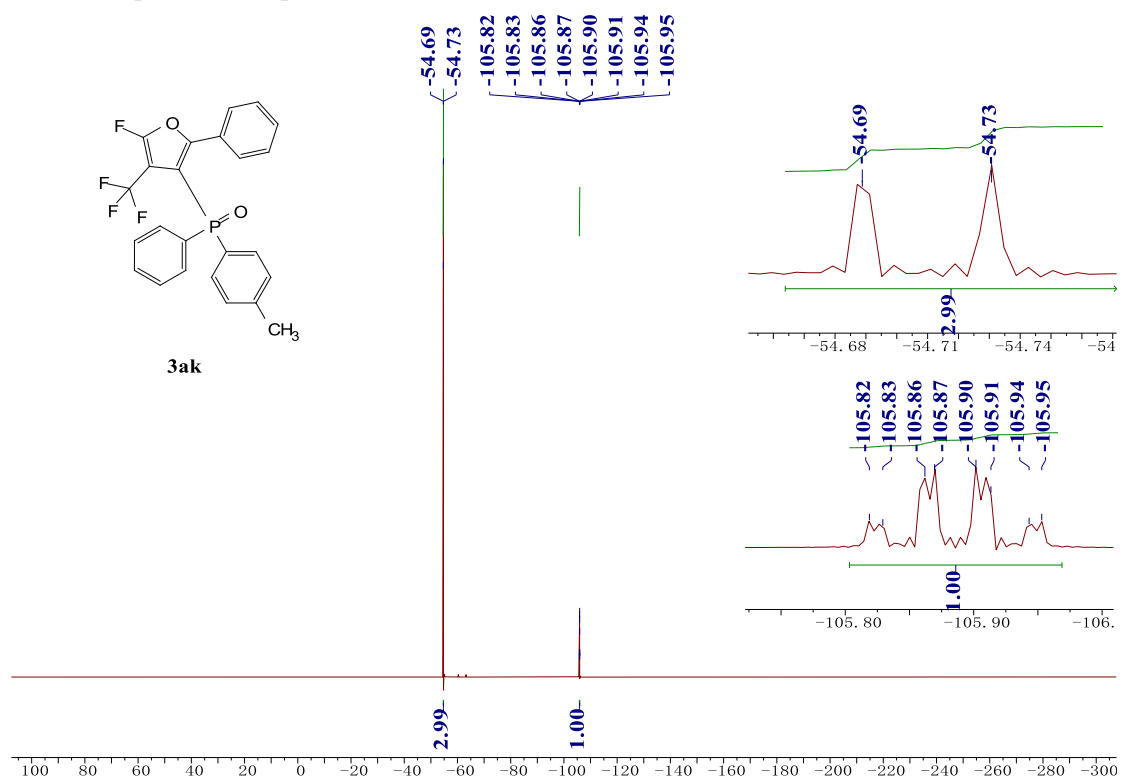

<sup>31</sup>P NMR spectra of the product **3ak** (162 MHz, CDCl<sub>3</sub>):

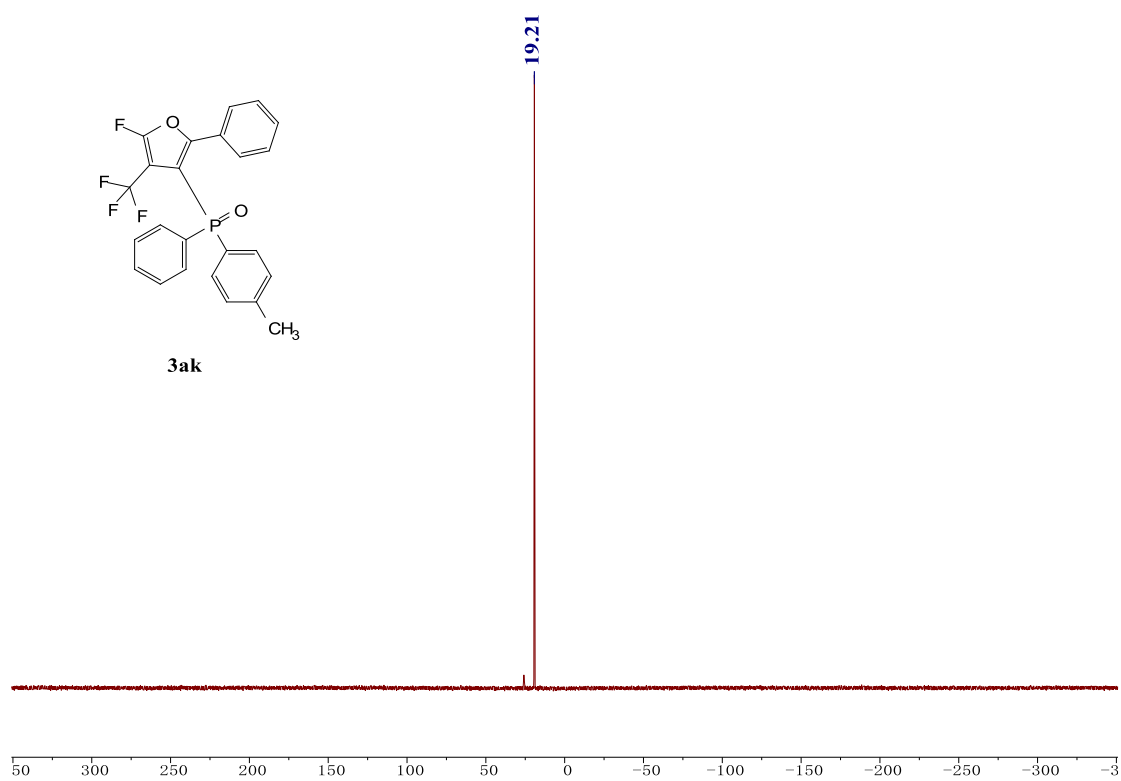

<sup>13</sup>C NMR spectra of the product **3ak** (100 MHz, CDCl<sub>3</sub>):

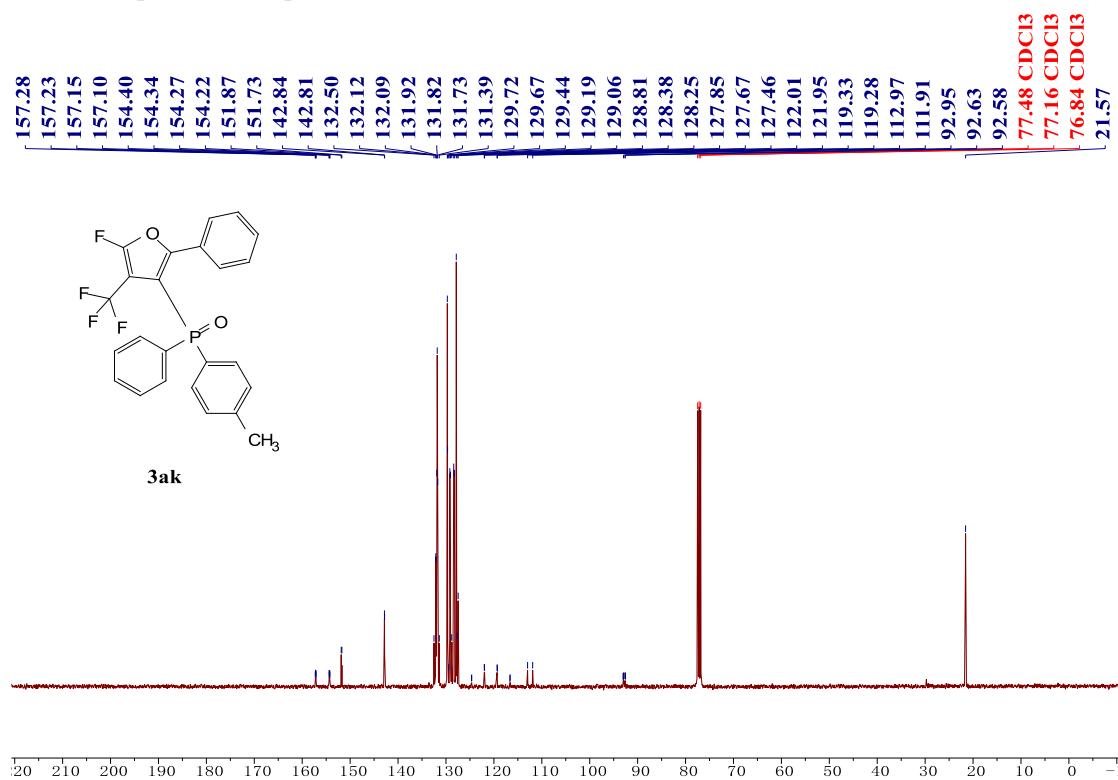

$^1\text{H}$  NMR spectra of the product **3al** (400 MHz,  $\text{CDCl}_3$ ):

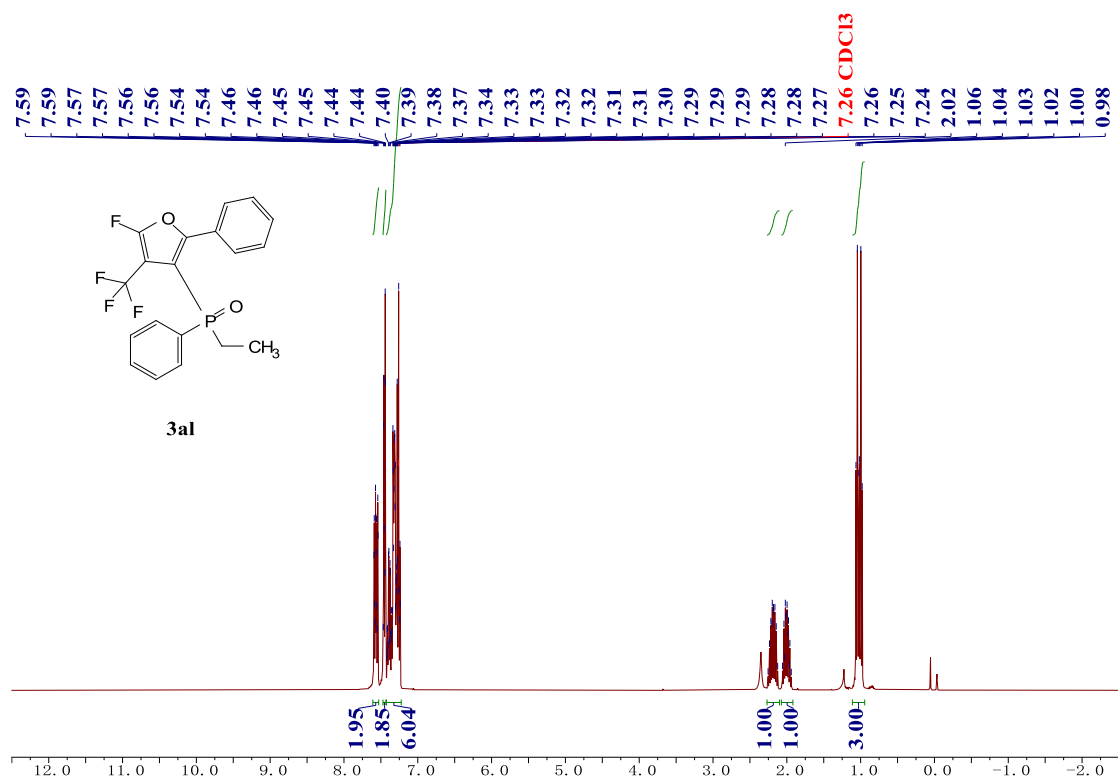

$^{19}\text{F}$  NMR spectra of the product **3al** (376 MHz,  $\text{CDCl}_3$ ):

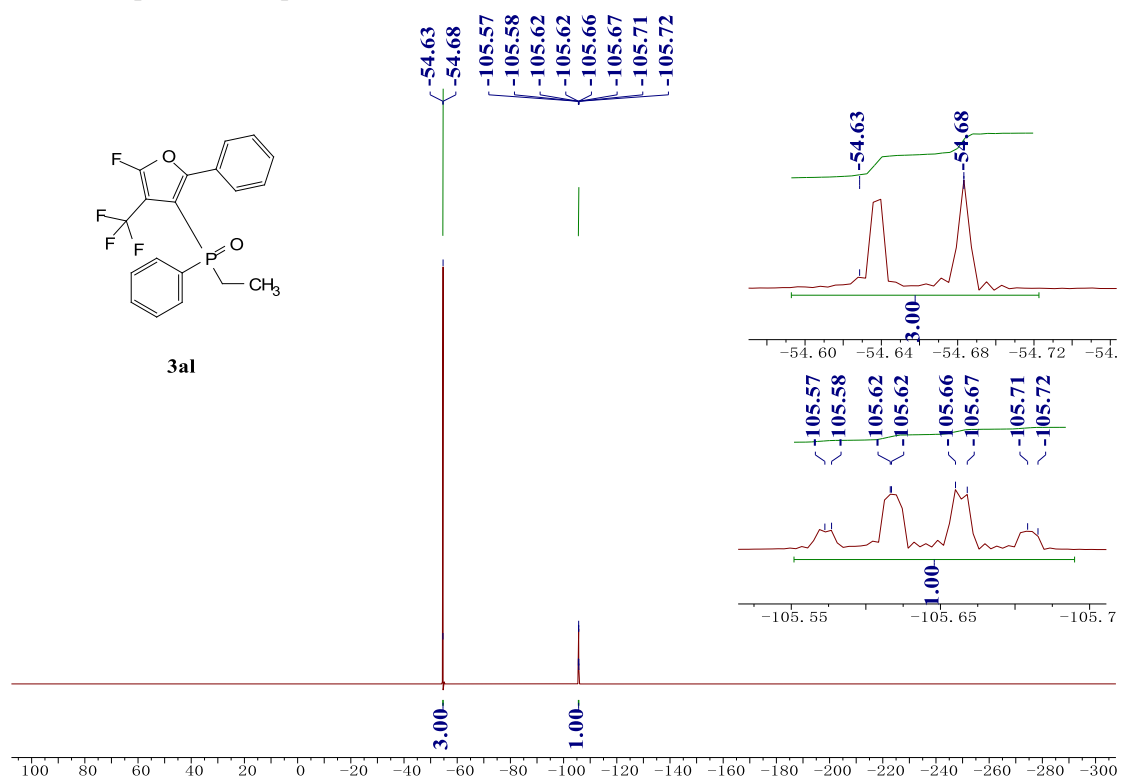

<sup>31</sup>P NMR spectra of the product **3al** (162 MHz, CDCl<sub>3</sub>):

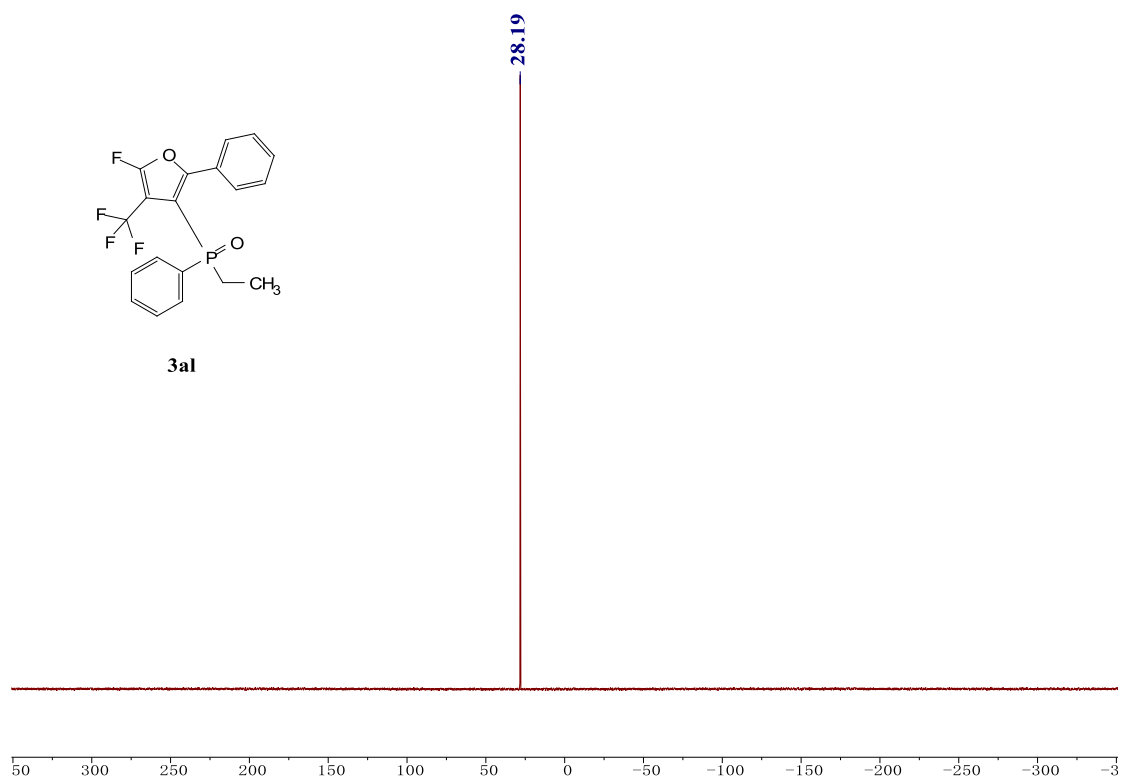

<sup>13</sup>C NMR spectra of the product **3al** (100 MHz, CDCl<sub>3</sub>):

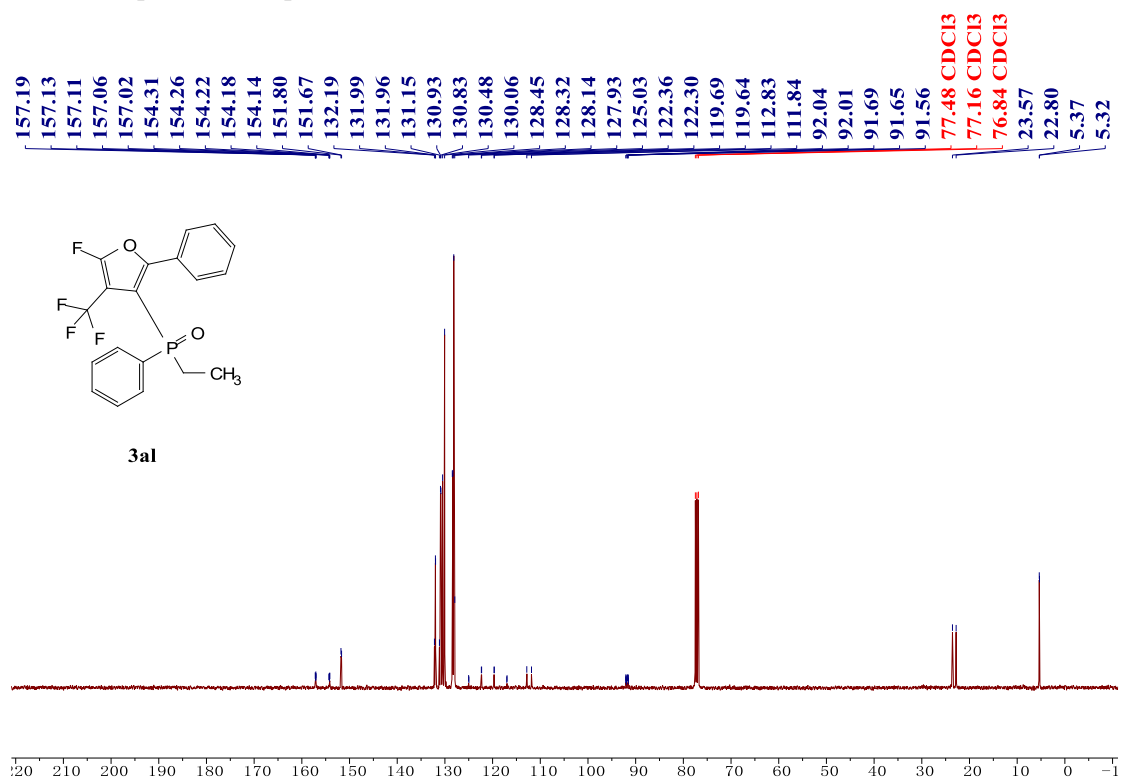

$^1\text{H}$  NMR spectra of the product **3am** (400 MHz,  $\text{CDCl}_3$ ):

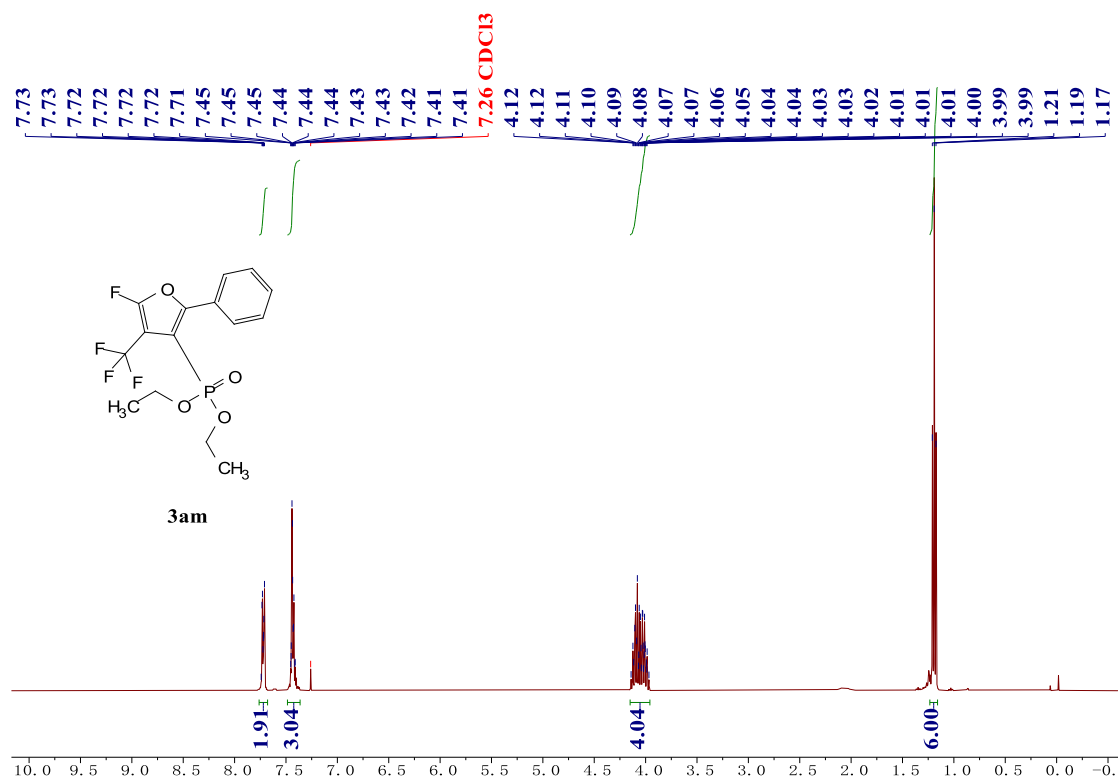

$^{19}\text{F}$  NMR spectra of the product **3am** (376 MHz,  $\text{CDCl}_3$ ):

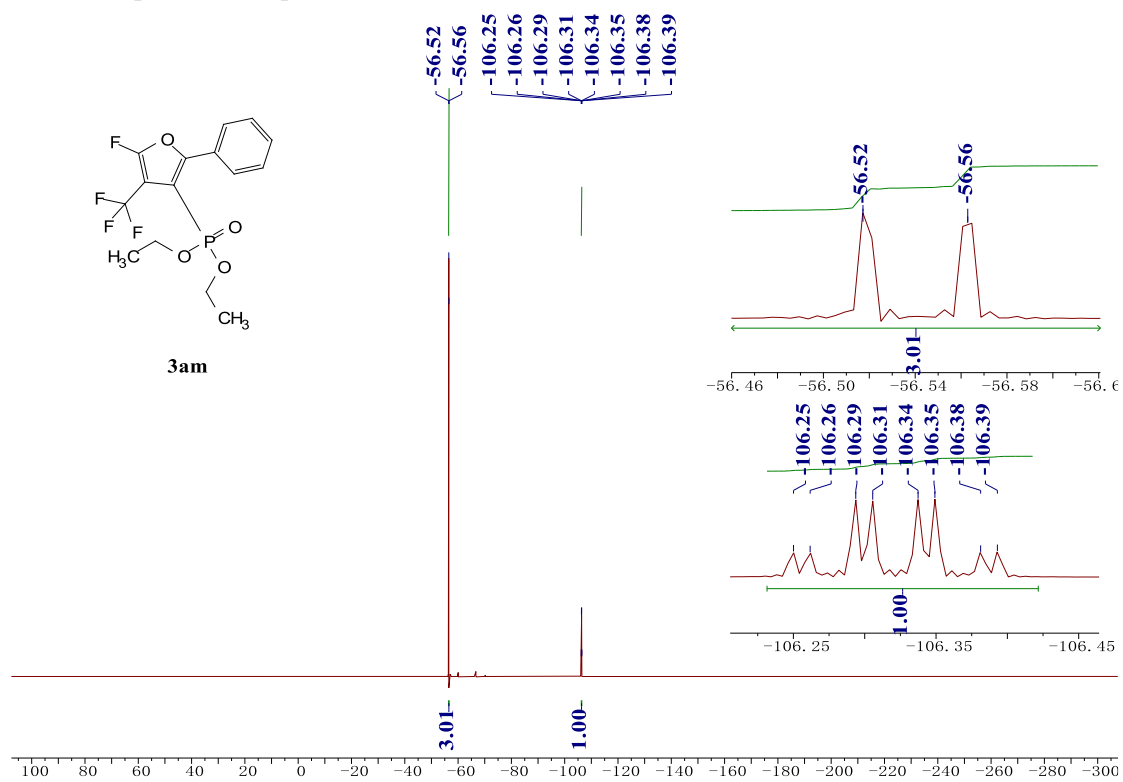

$^{31}\text{P}$  NMR spectra of the product **3am** (162 MHz,  $\text{CDCl}_3$ ):

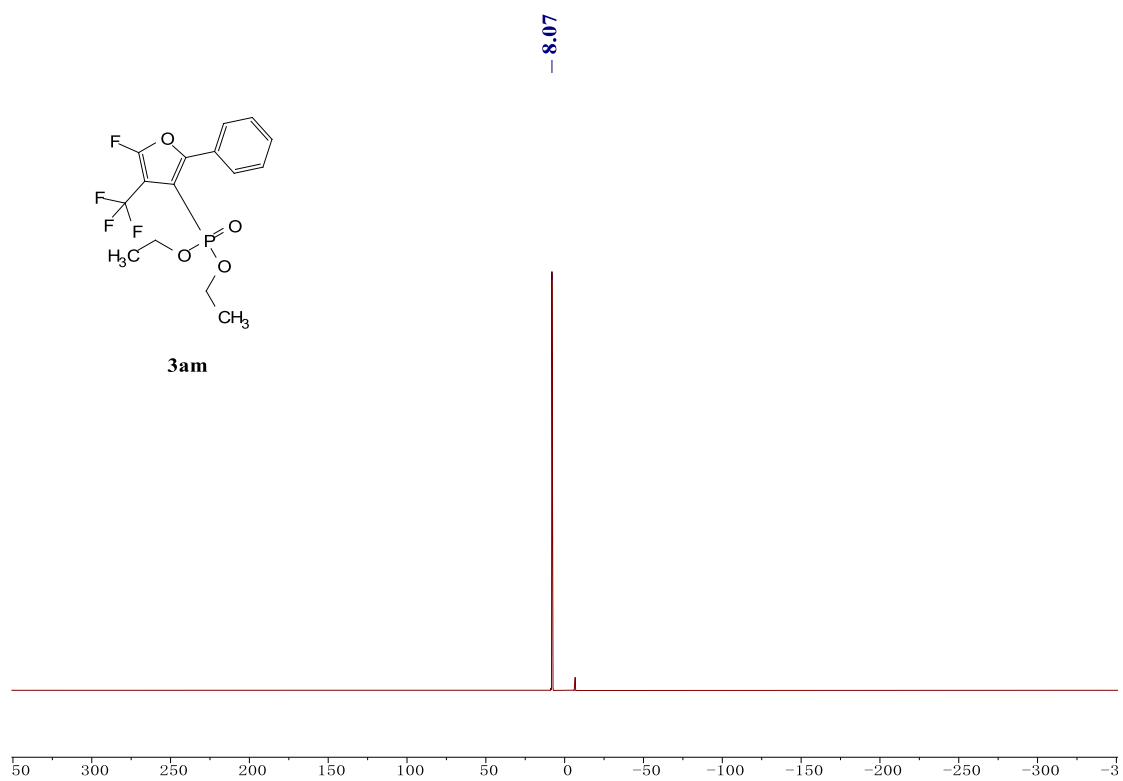

$^{13}\text{C}$  NMR spectra of the product **3am** (100 MHz,  $\text{CDCl}_3$ ):

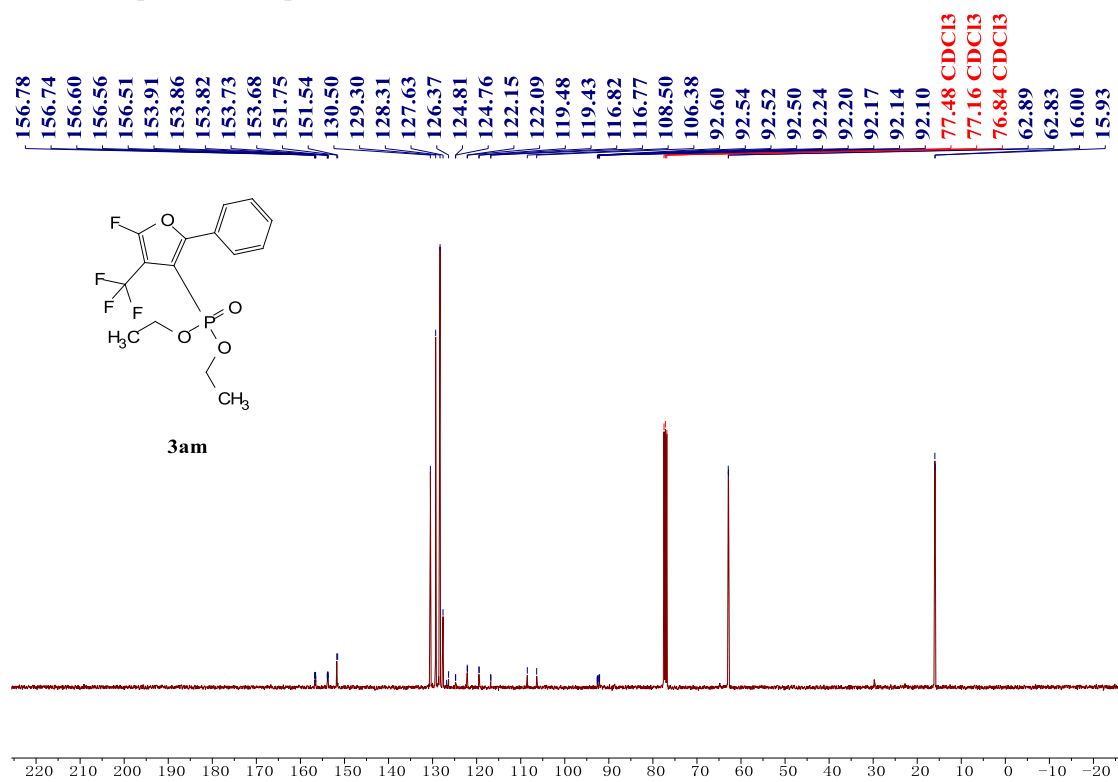

$^1\text{H}$  NMR spectra of the product **3ba** (400 MHz,  $\text{CDCl}_3$ ):

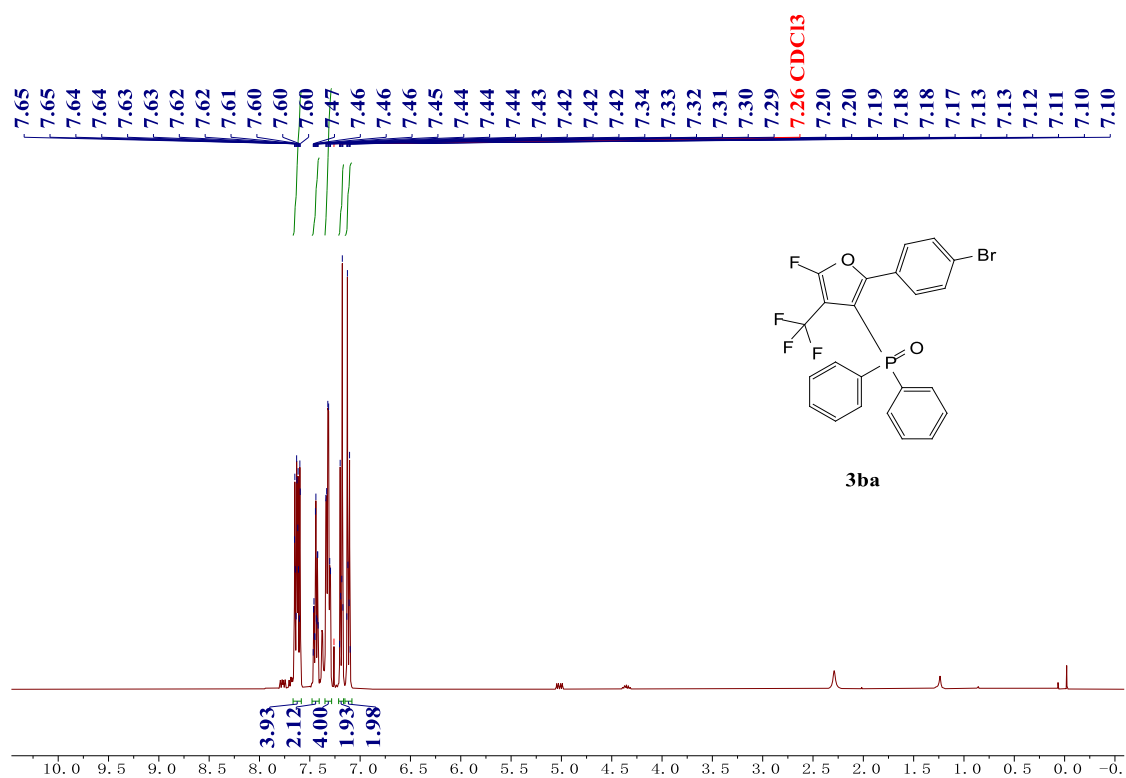

$^{19}\text{F}$  NMR spectra of the product **3ba** (376 MHz,  $\text{CDCl}_3$ ):

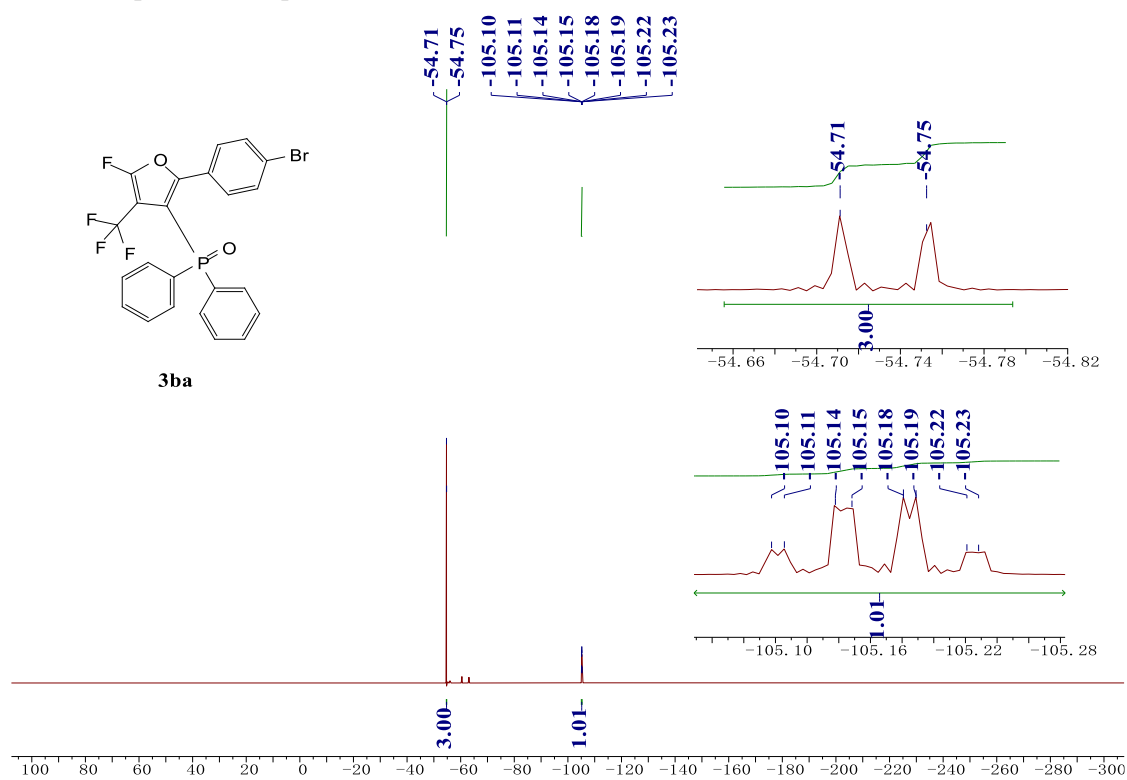

<sup>31</sup>P NMR spectra of the product **3ba** (162 MHz, CDCl<sub>3</sub>):

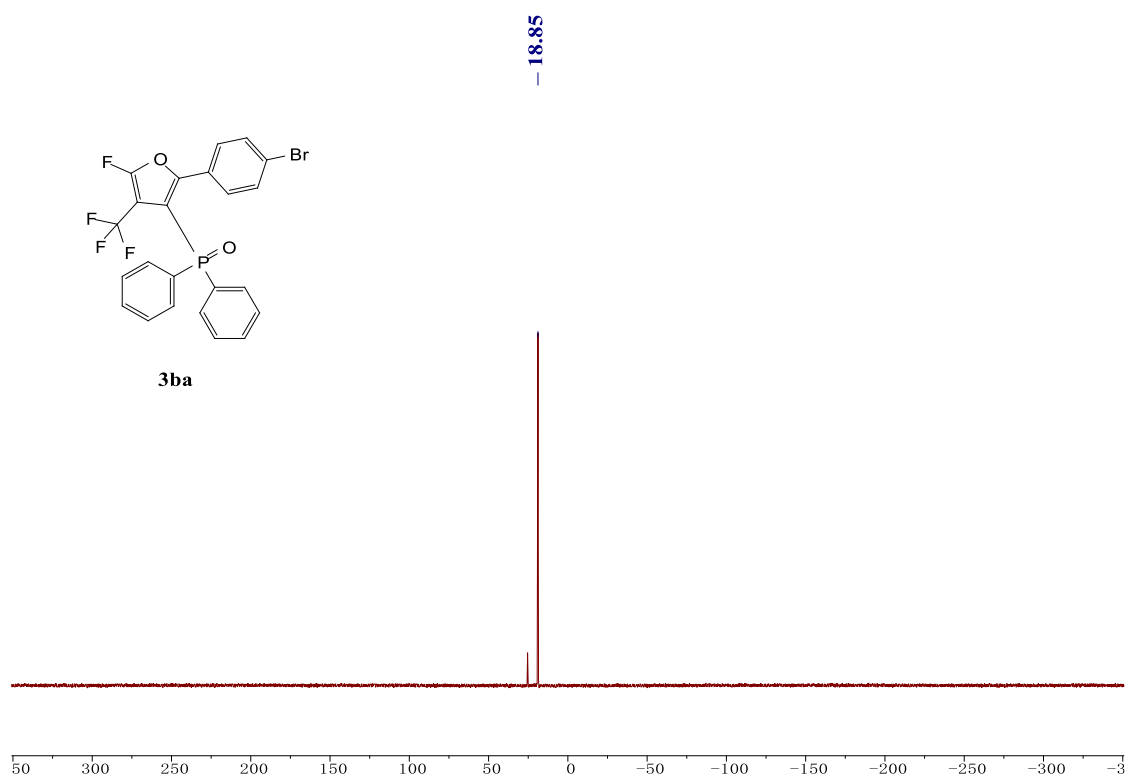

<sup>13</sup>C NMR spectra of the product **3ba** (100 MHz, CDCl<sub>3</sub>):

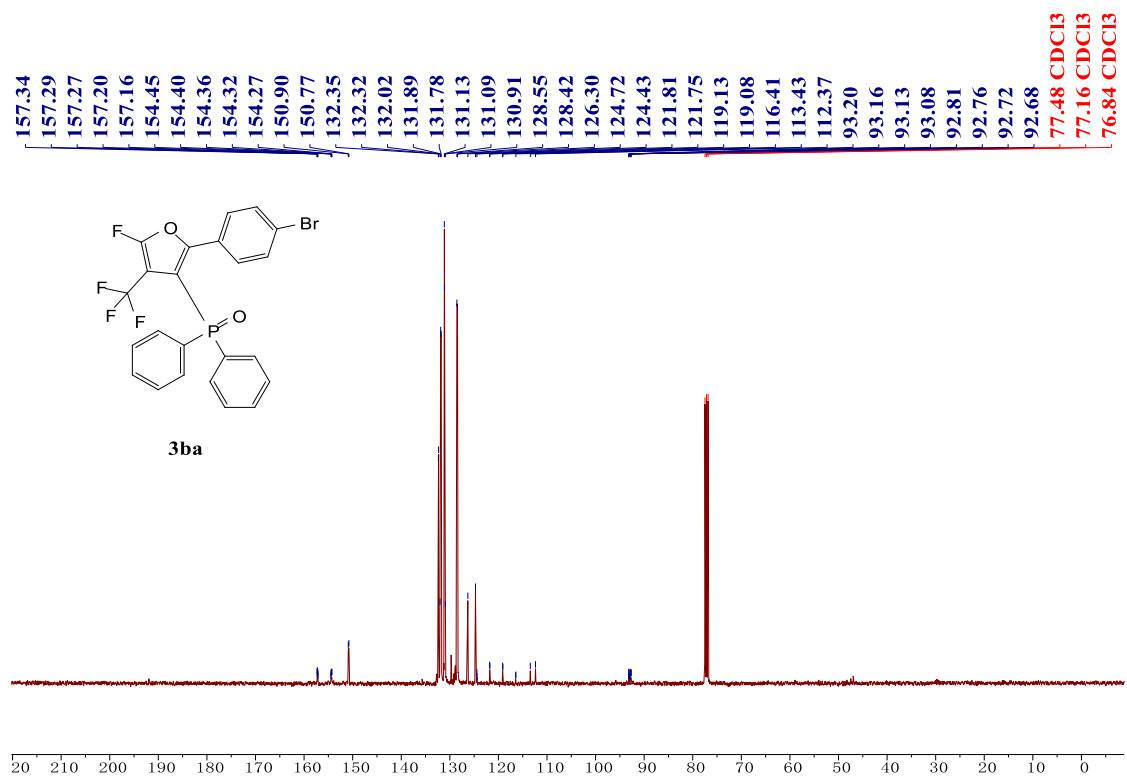



$^1\text{H}$  NMR spectra of the product **3ca** (400 MHz,  $\text{CDCl}_3$ ):

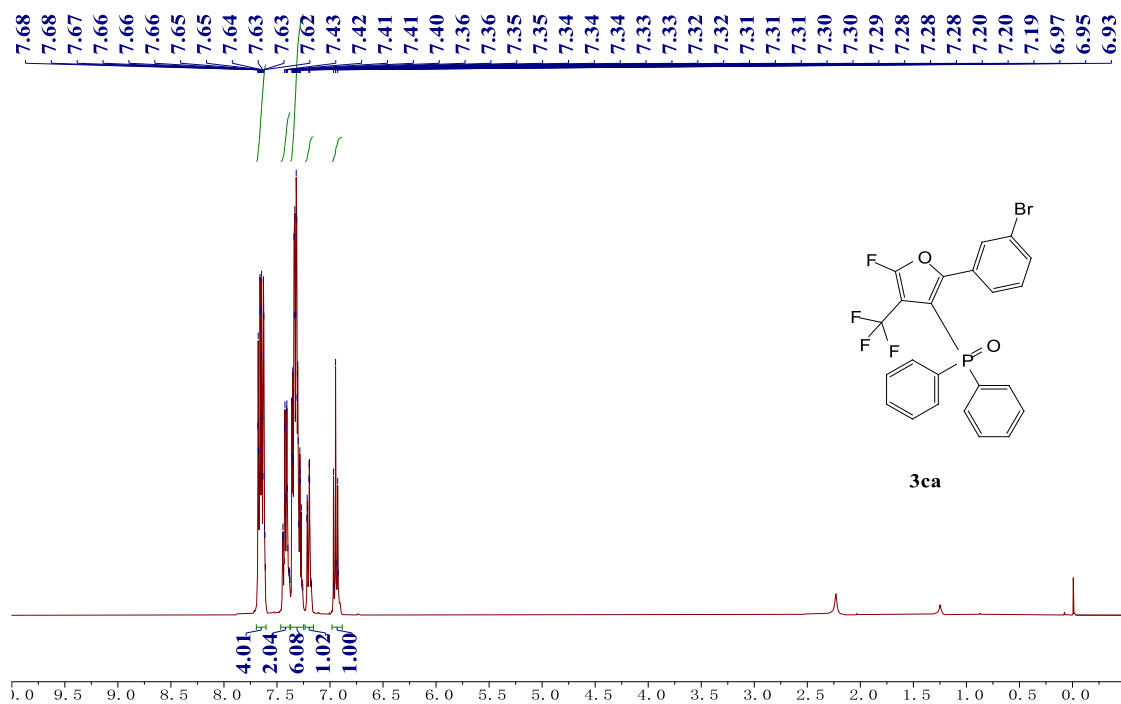

$^{19}\text{F}$  NMR spectra of the product **3ca** (376 MHz,  $\text{CDCl}_3$ ):

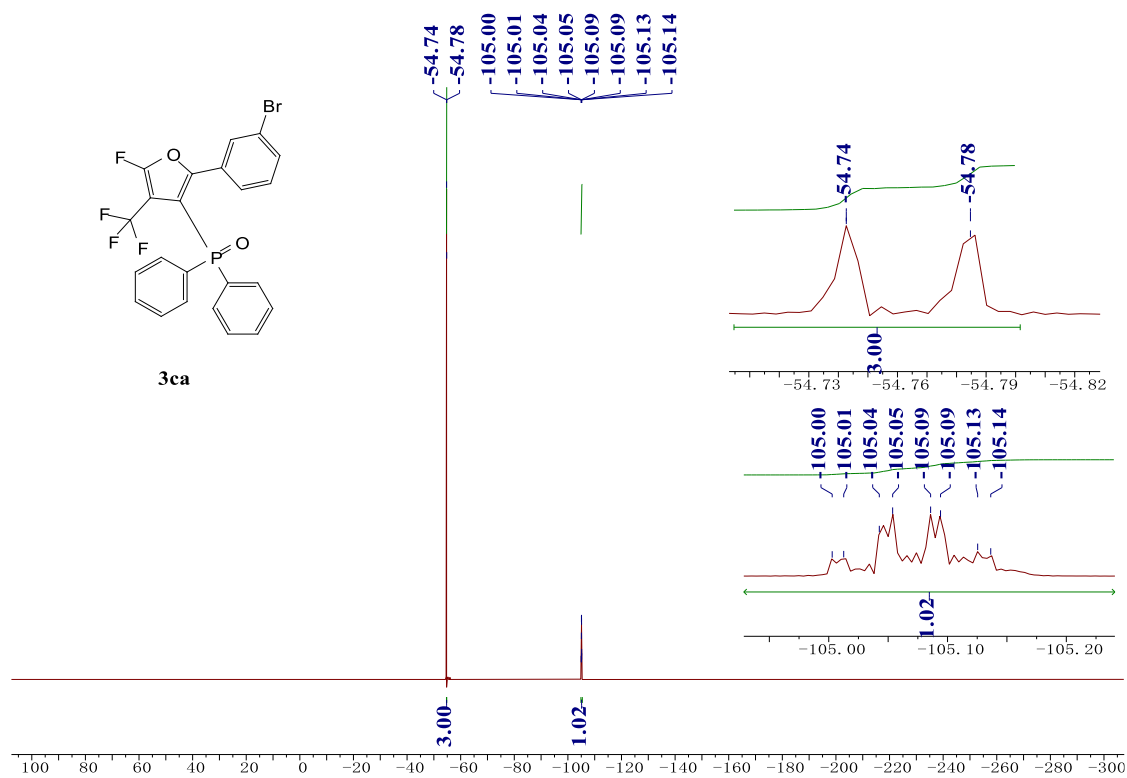

$^{31}\text{P}$  NMR spectra of the product **3ca** (162 MHz,  $\text{CDCl}_3$ ):

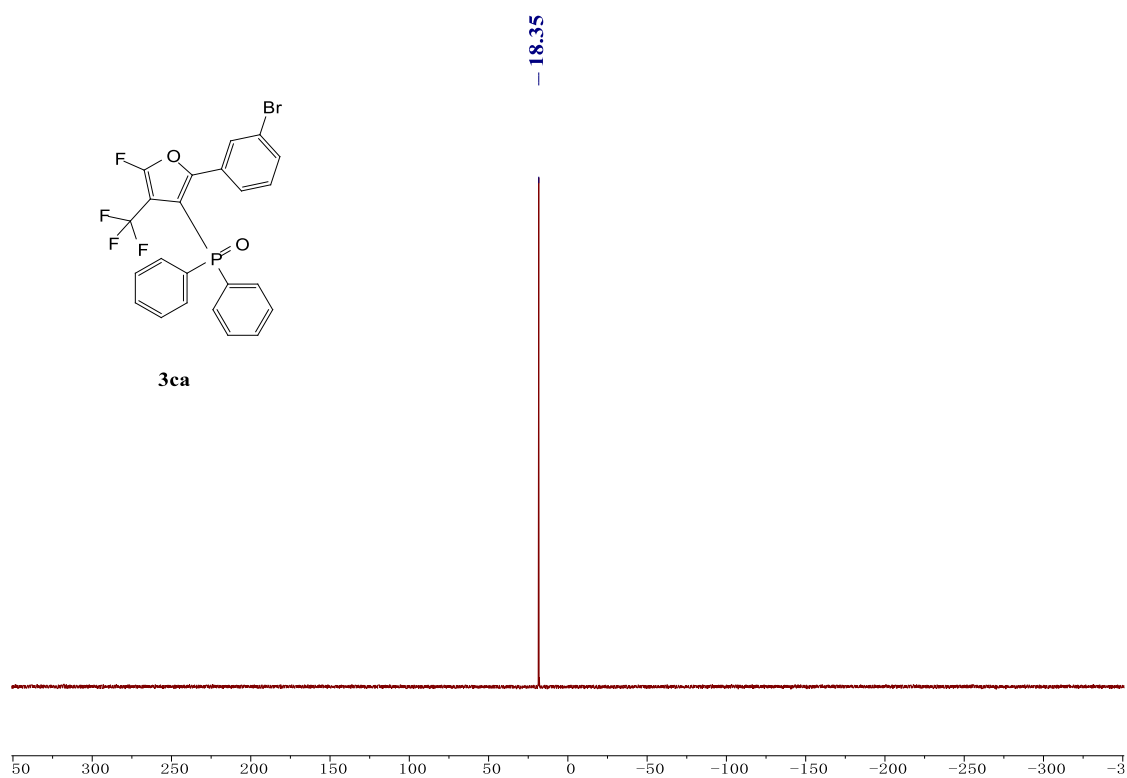

$^{13}\text{C}$  NMR spectra of the product **3ca** (100 MHz,  $\text{CDCl}_3$ ):

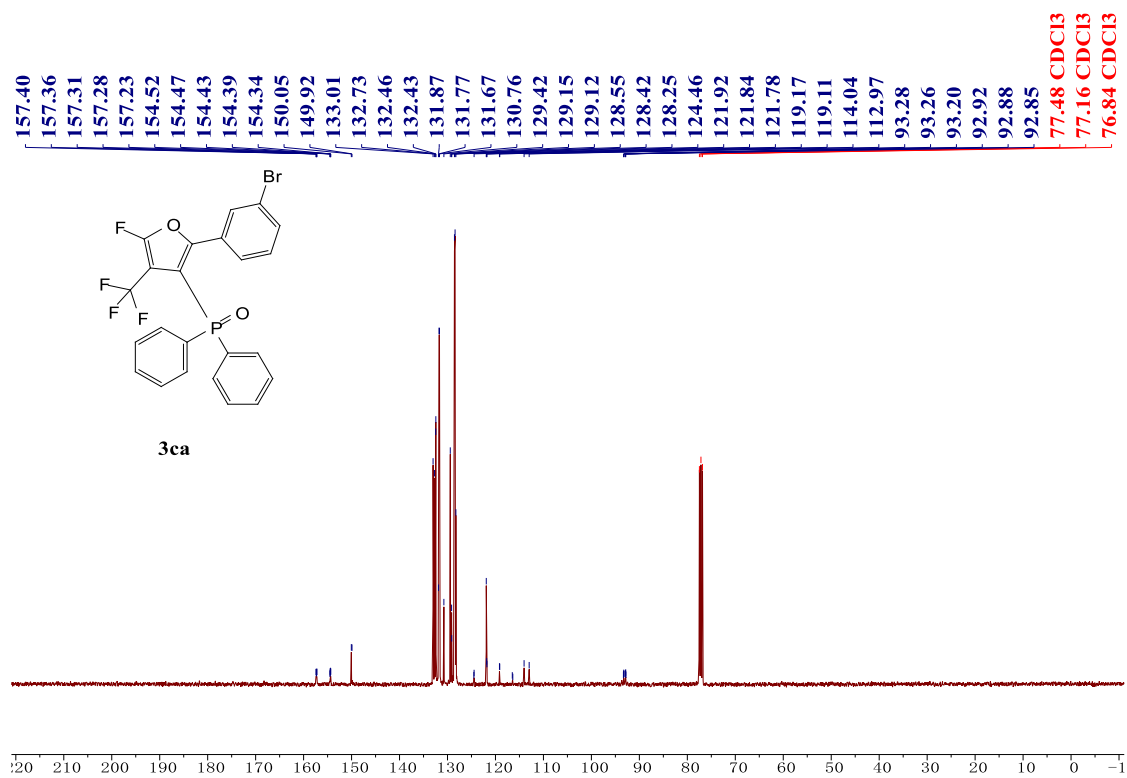

$^1\text{H}$  NMR spectra of the product **3da** (400 MHz,  $\text{CDCl}_3$ ):

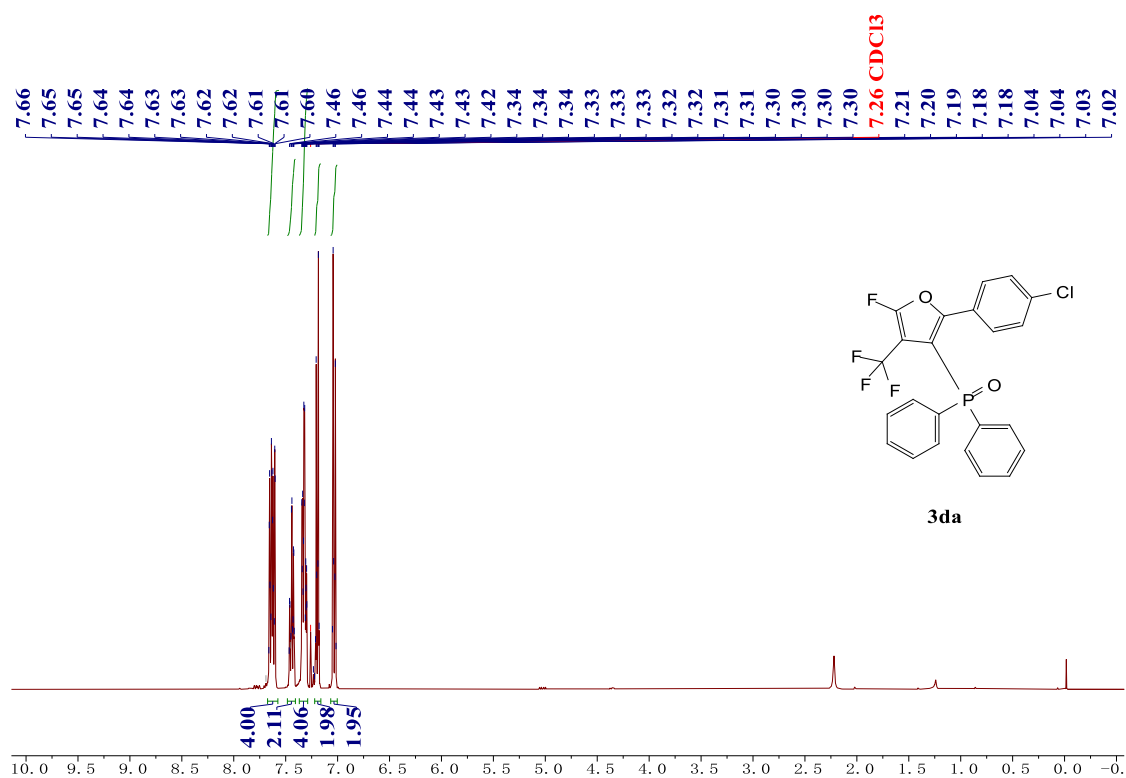

$^{19}\text{F}$  NMR spectra of the product **3da** (376 MHz,  $\text{CDCl}_3$ ):

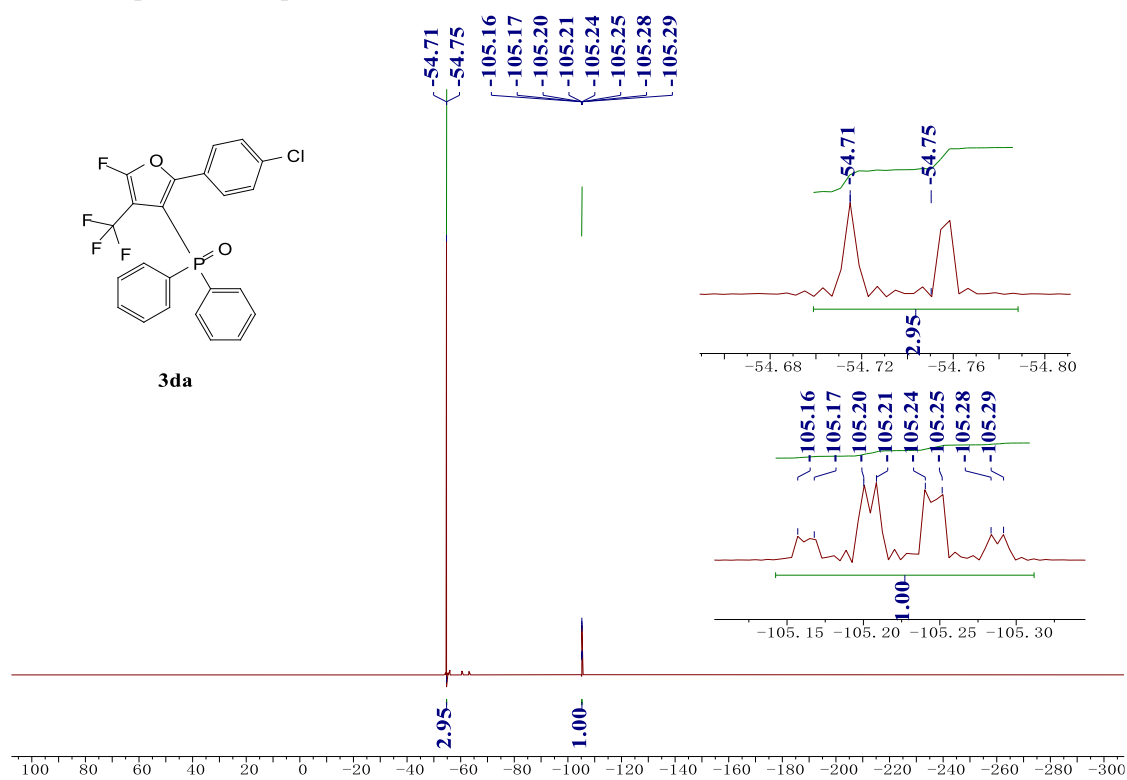

$^{31}\text{P}$  NMR spectra of the product **3da** (162 MHz,  $\text{CDCl}_3$ ):

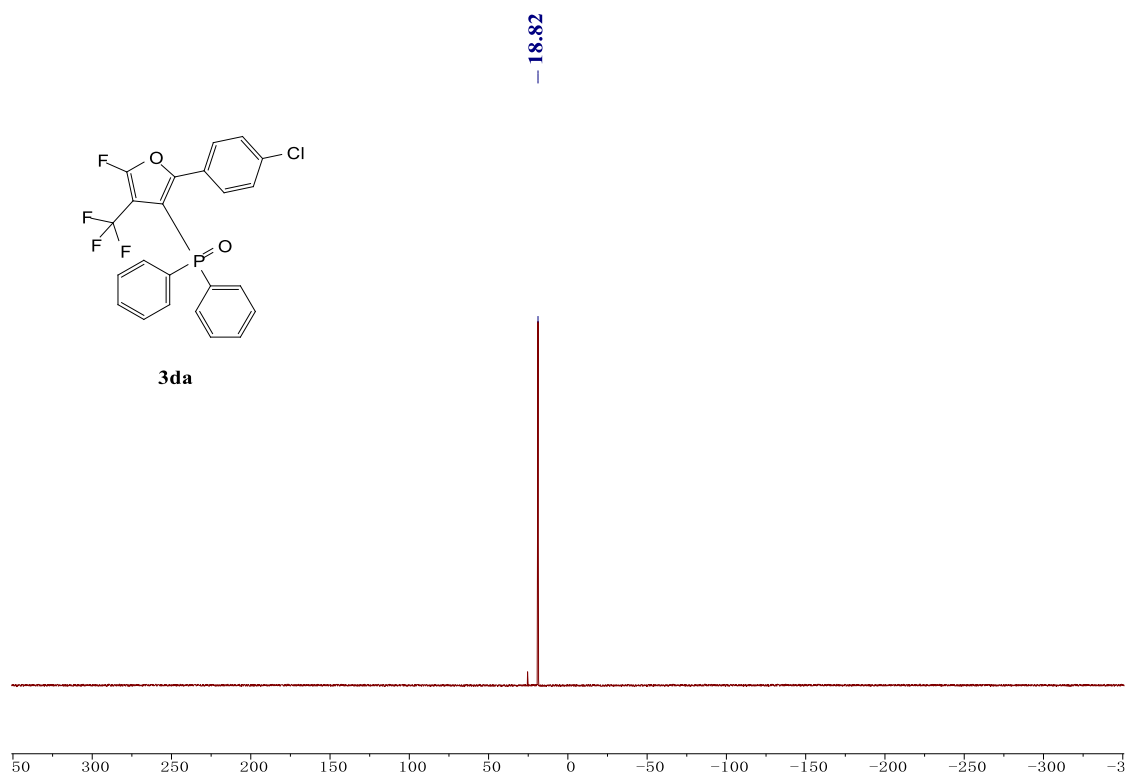

$^{13}\text{C}$  NMR spectra of the product **3da** (100 MHz,  $\text{CDCl}_3$ ):

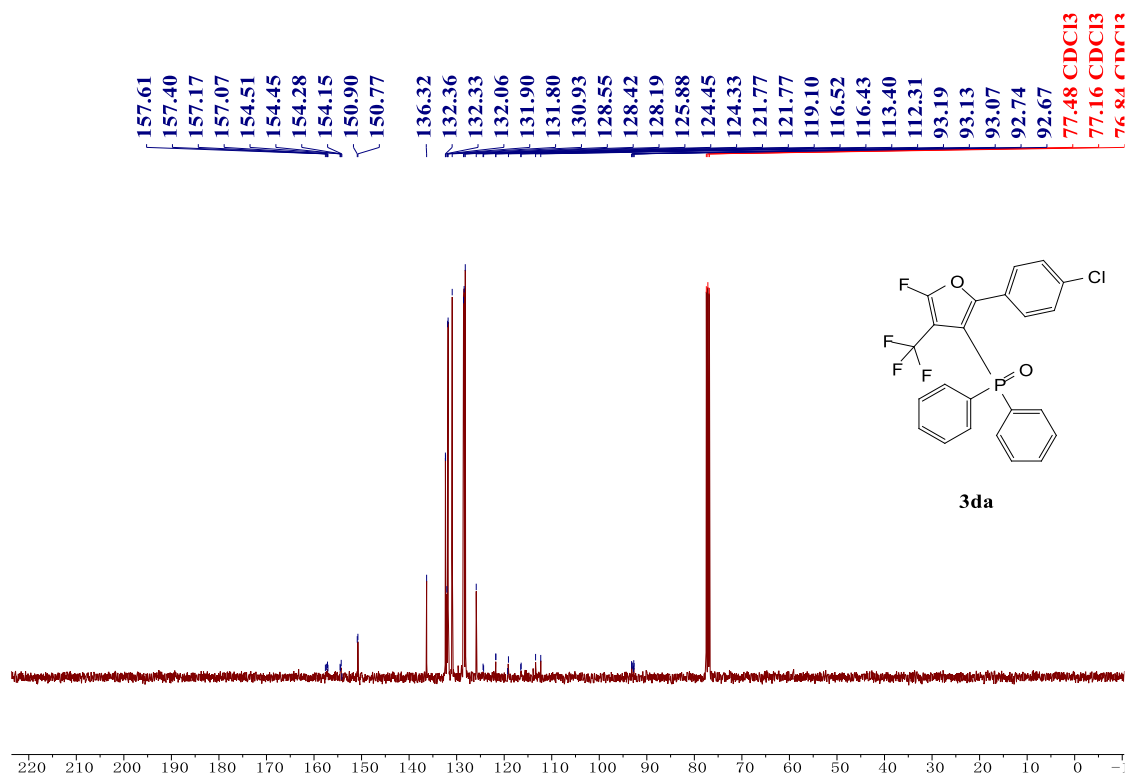



$^{31}\text{P}$  NMR spectra of the product **3ea** (162 MHz,  $\text{CDCl}_3$ ):

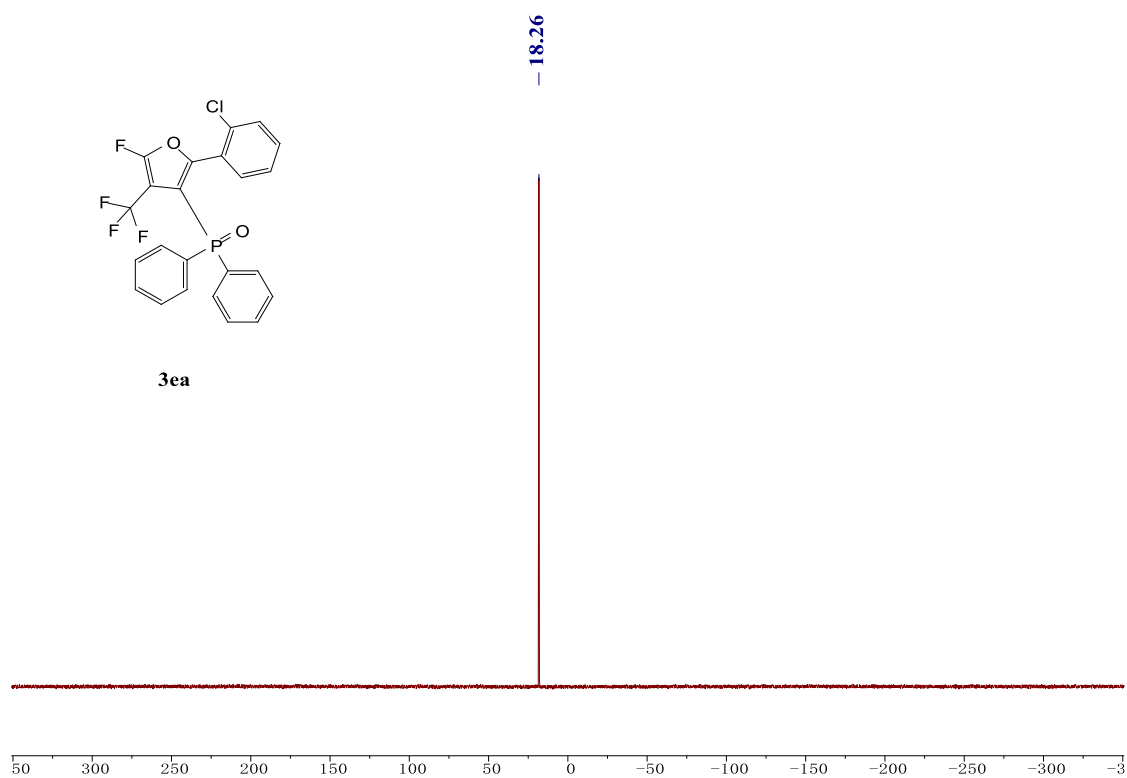

$^{13}\text{C}$  NMR spectra of the product **3ea** (100 MHz,  $\text{CDCl}_3$ ):

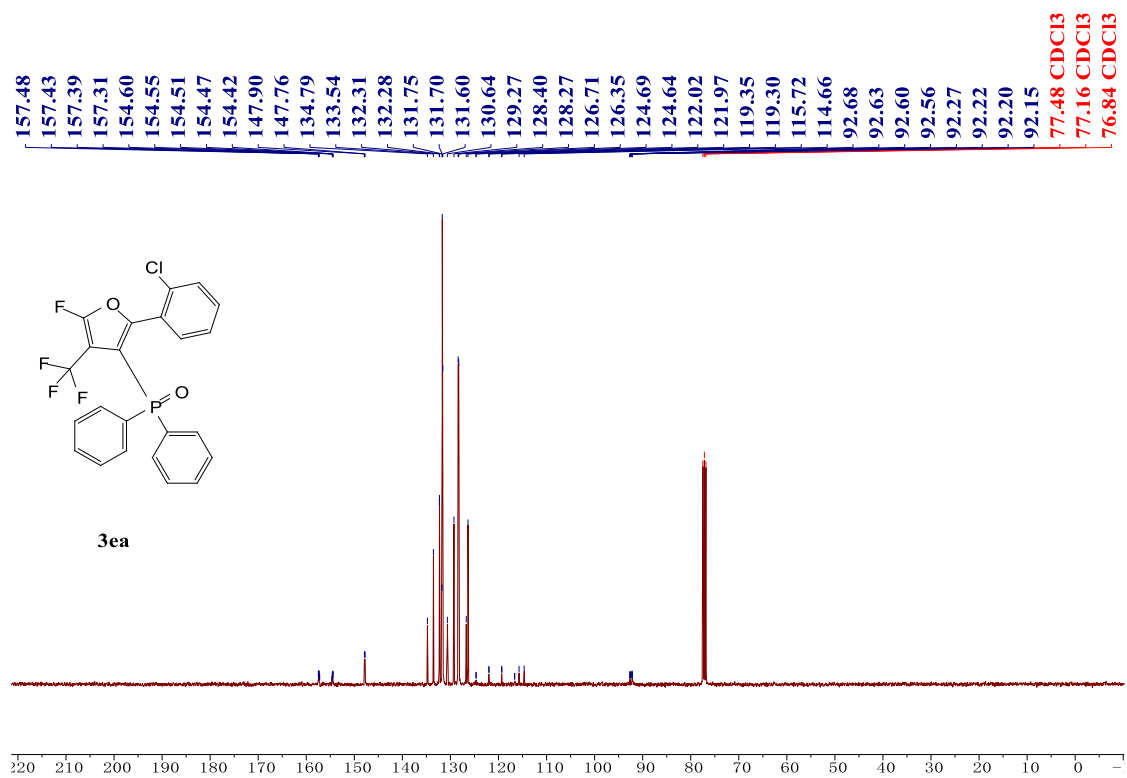

$^1\text{H}$  NMR spectra of the product **3fa** (400 MHz,  $\text{CDCl}_3$ ):

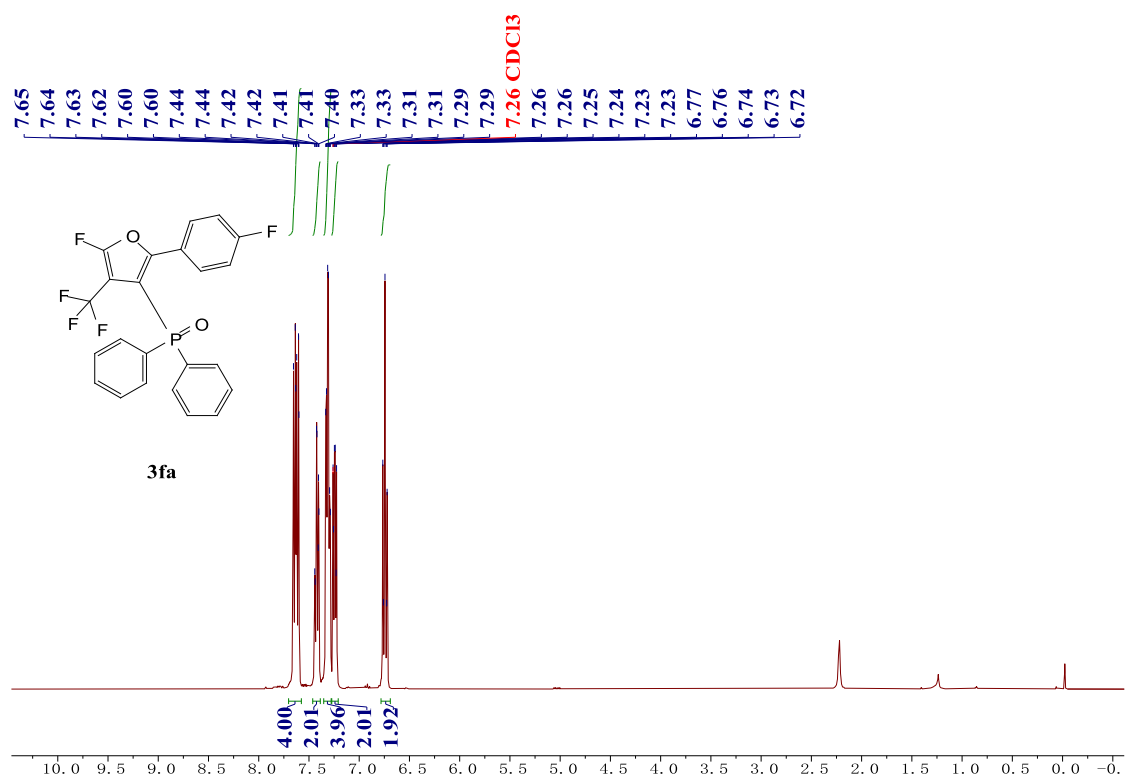

$^{19}\text{F}$  NMR spectra of the product **3fa** (376 MHz,  $\text{CDCl}_3$ ):

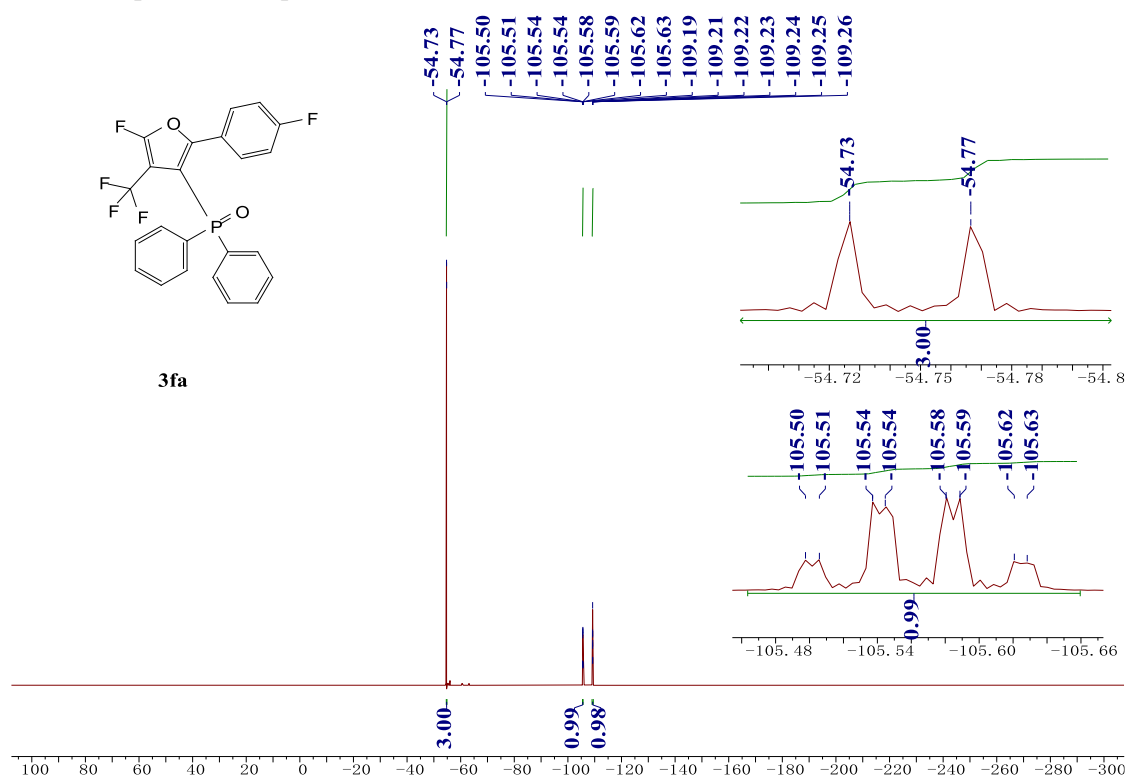

$^{31}\text{P}$  NMR spectra of the product **3fa** (162 MHz,  $\text{CDCl}_3$ ):

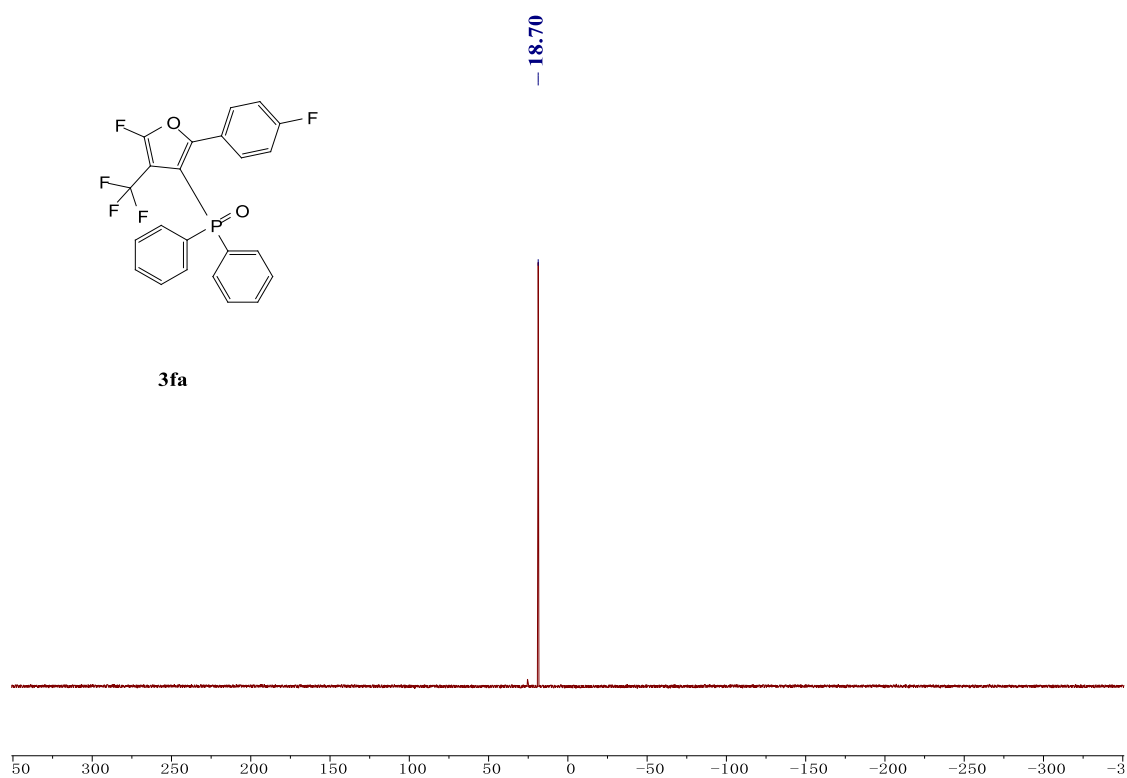

$^{13}\text{C}$  NMR spectra of the product **3fa** (100 MHz,  $\text{CDCl}_3$ ):

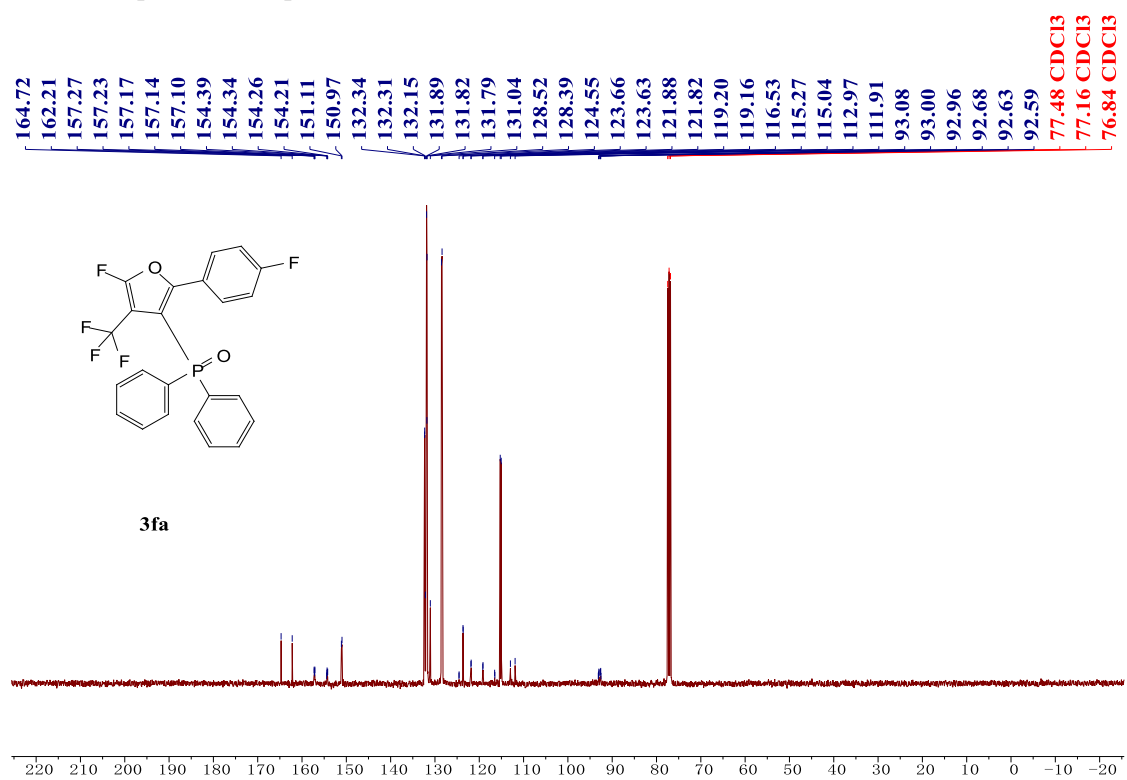



$^1\text{H}$  NMR spectra of the product **3ga** (400 MHz,  $\text{CDCl}_3$ ):

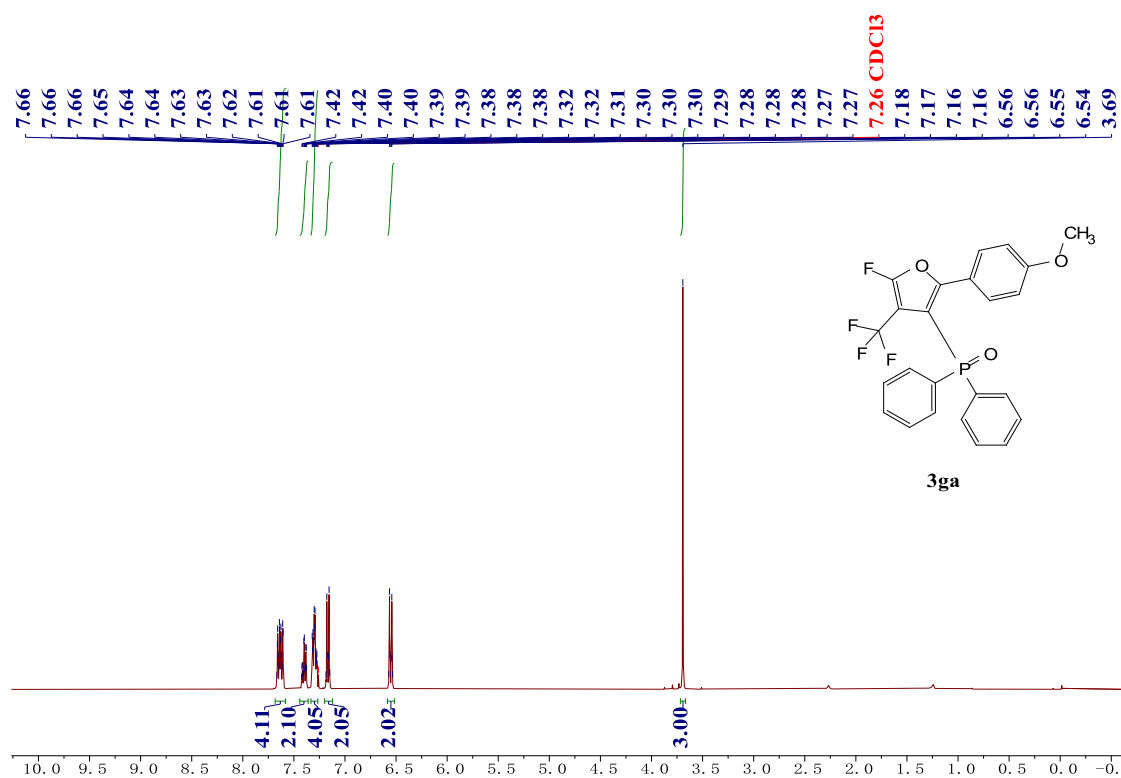

$^{19}\text{F}$  NMR spectra of the product **3ga** (376 MHz,  $\text{CDCl}_3$ ):

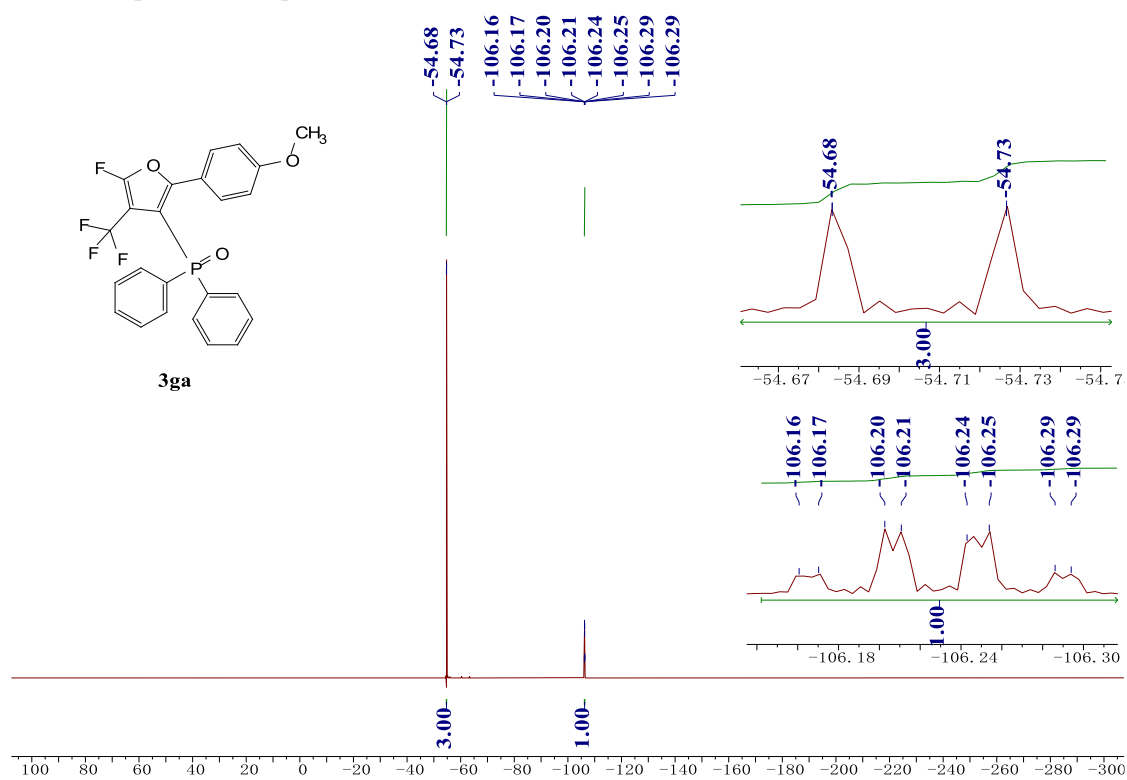

$^{31}\text{P}$  NMR spectra of the product **3ga** (162 MHz,  $\text{CDCl}_3$ ):

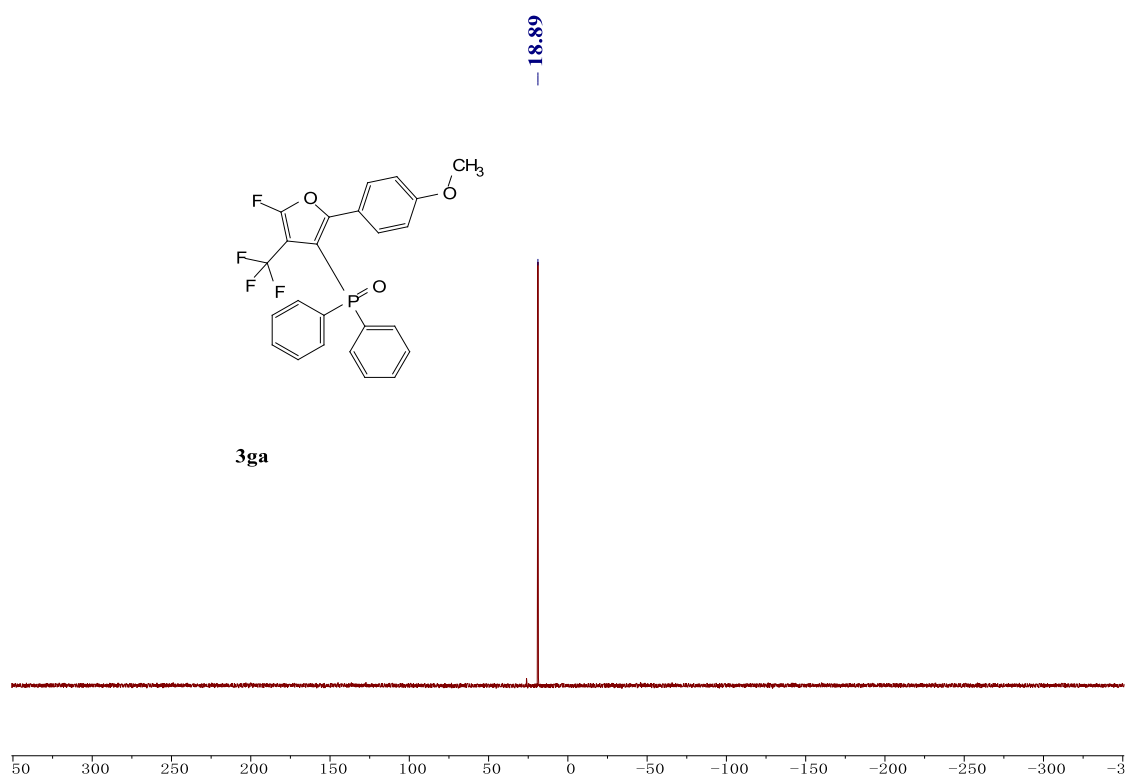

$^{13}\text{C}$  NMR spectra of the product **3ga** (100 MHz,  $\text{CDCl}_3$ ):

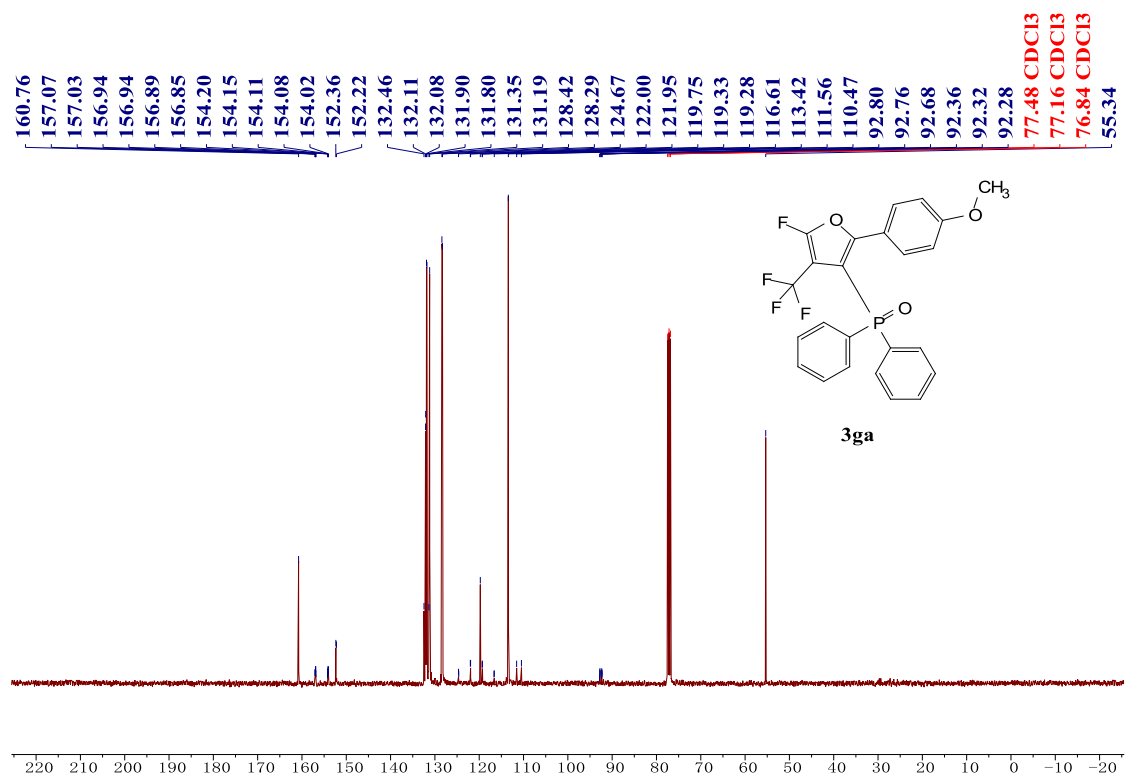

$^1\text{H}$  NMR spectra of the product **3ha** (400 MHz,  $\text{CDCl}_3$ ):

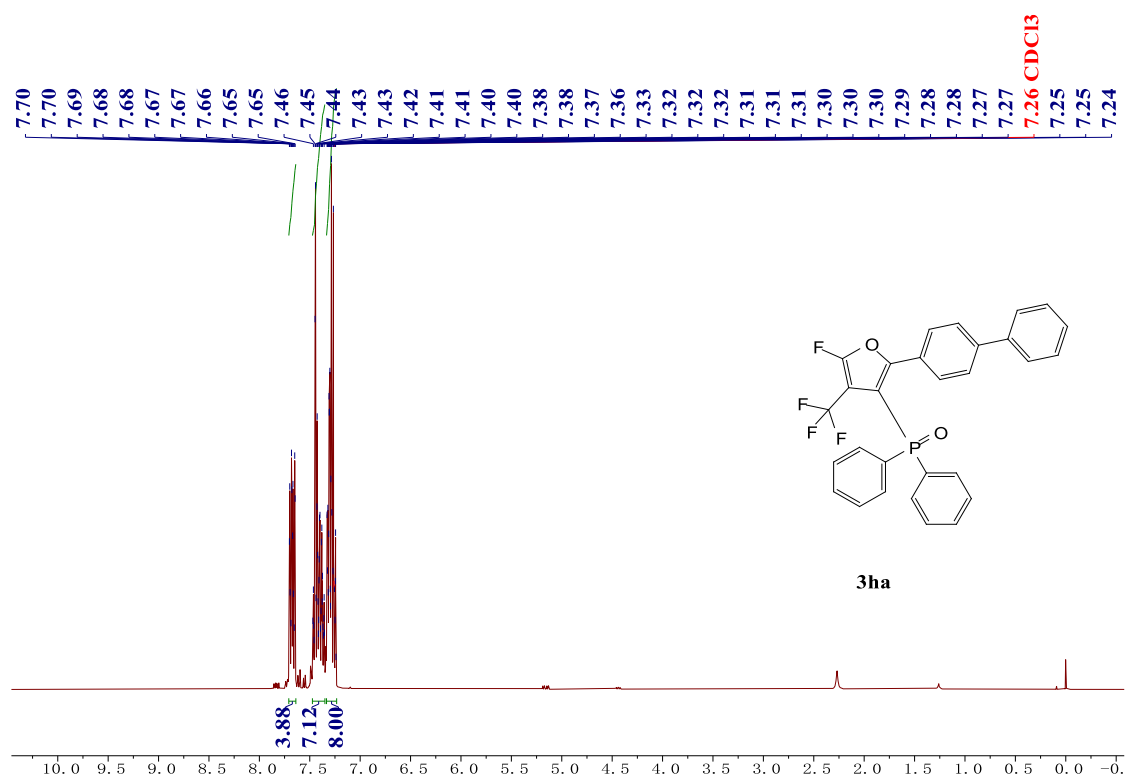

$^{19}\text{F}$  NMR spectra of the product **3ha** (376 MHz,  $\text{CDCl}_3$ ):

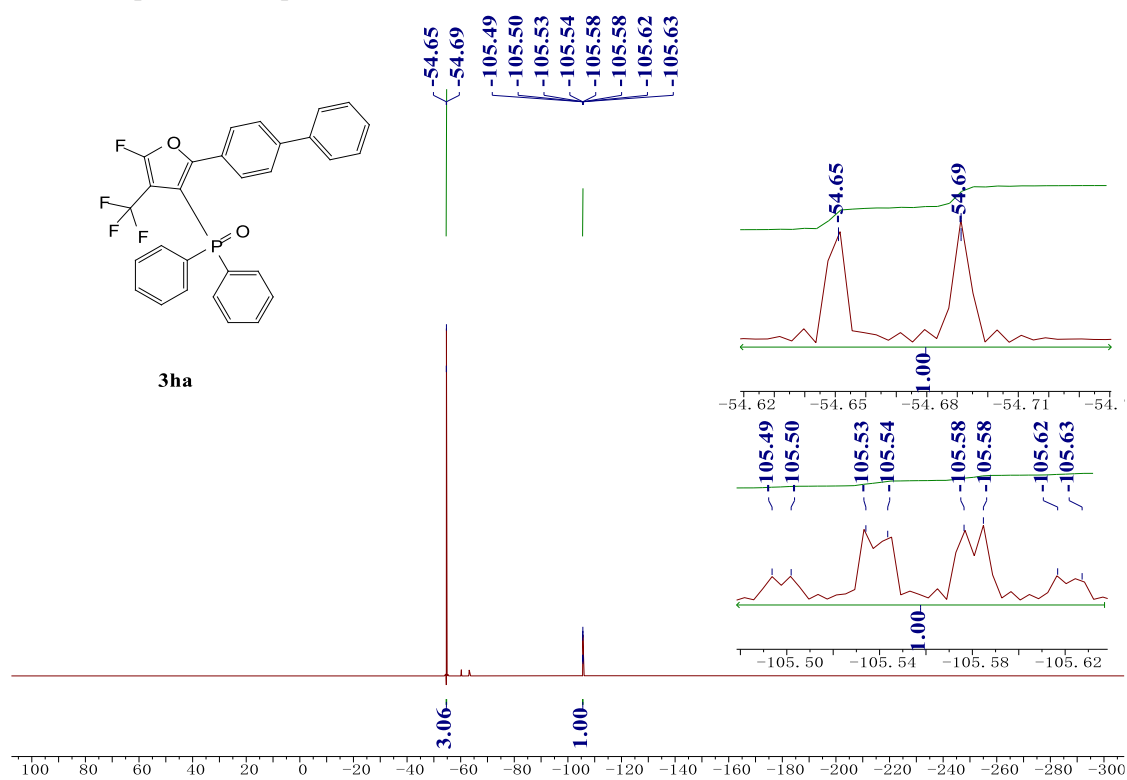

$^{31}\text{P}$  NMR spectra of the product **3ha** (162 MHz,  $\text{CDCl}_3$ ):

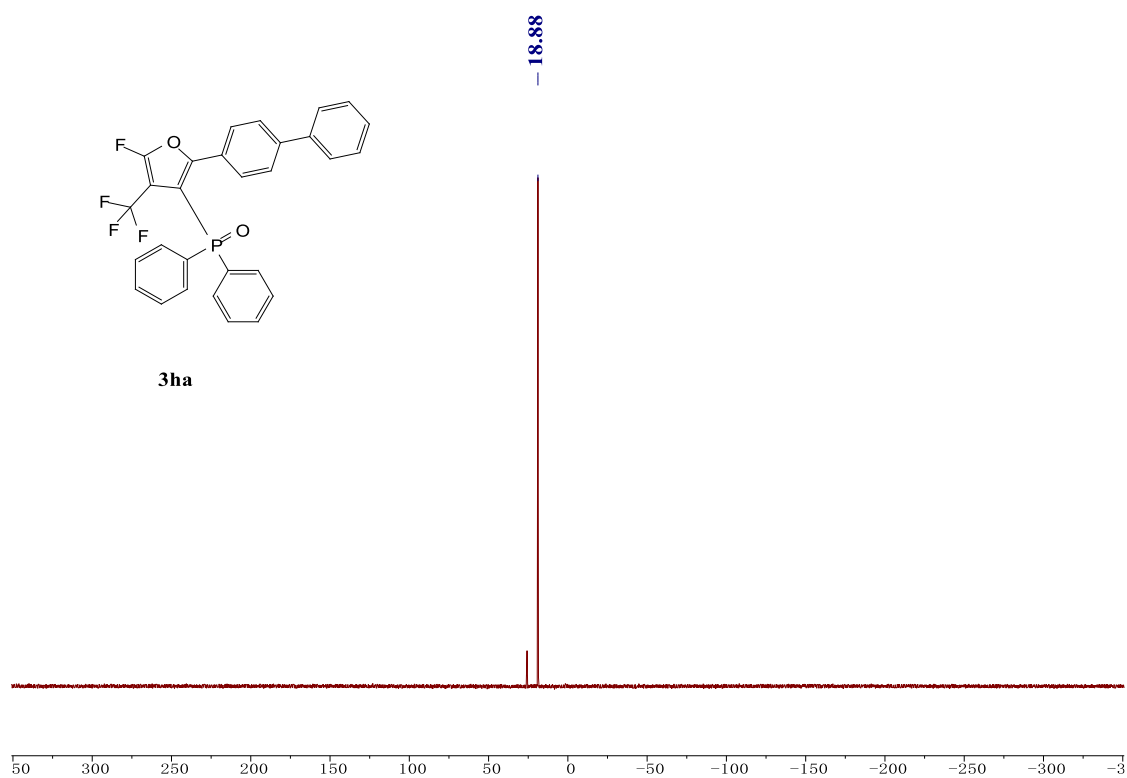

$^{13}\text{C}$  NMR spectra of the product **3ha** (100 MHz,  $\text{CDCl}_3$ ):

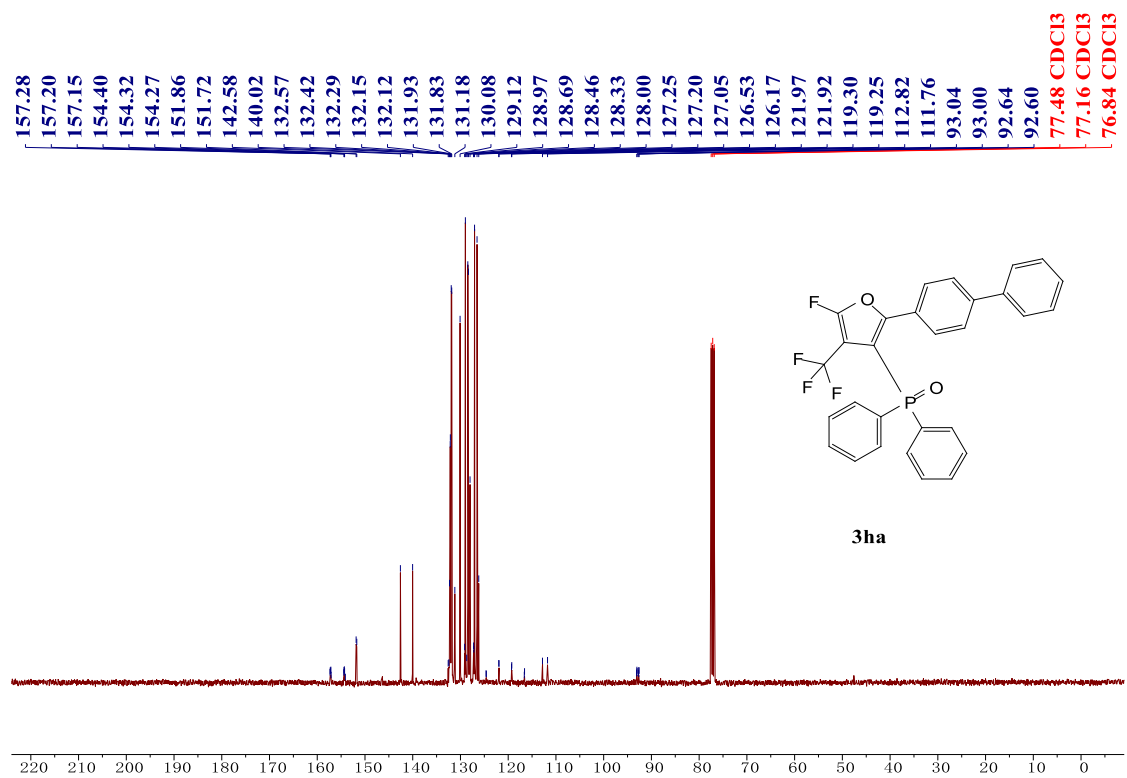

$^1\text{H}$  NMR spectra of the product **3ia** (400 MHz,  $\text{CDCl}_3$ ):

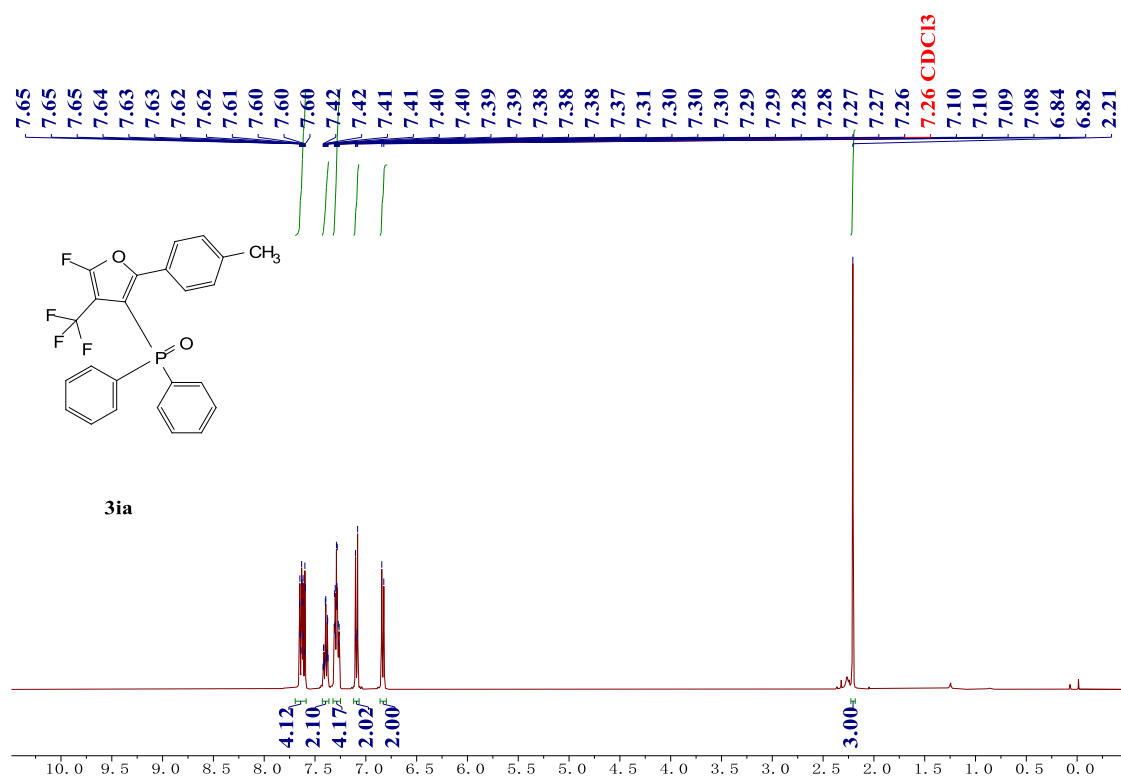

$^{19}\text{F}$  NMR spectra of the product **3ia** (376 MHz,  $\text{CDCl}_3$ ):

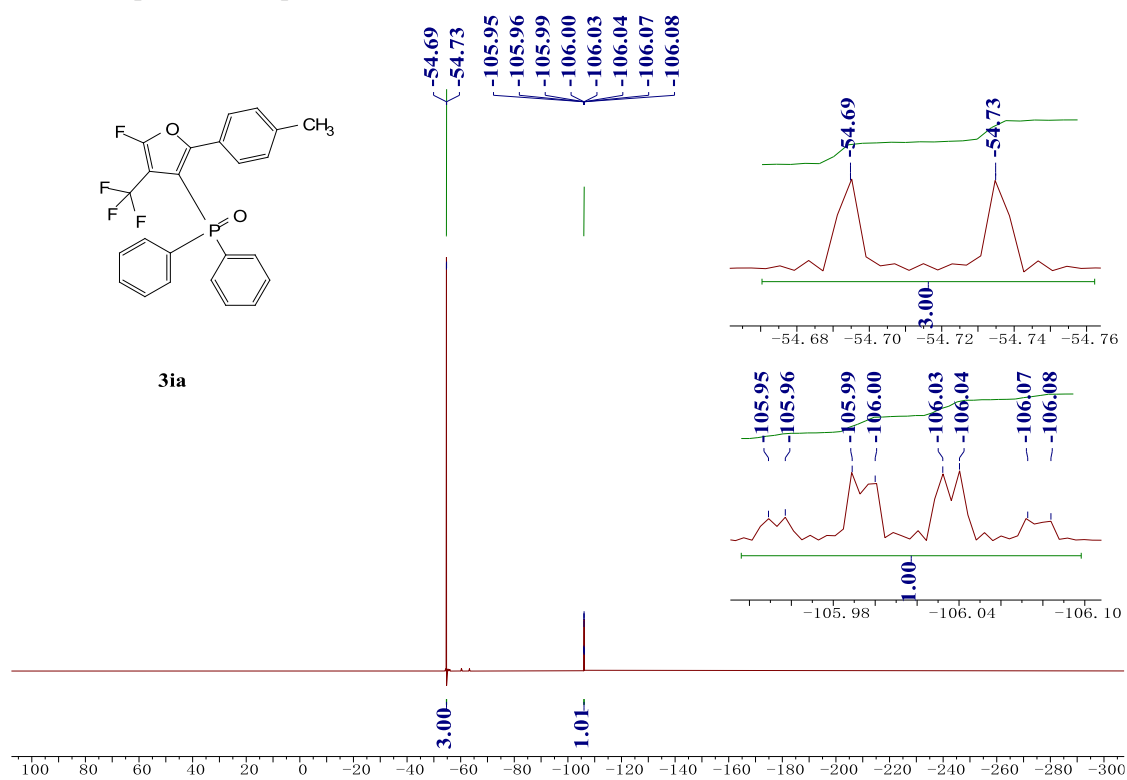

$^{31}\text{P}$  NMR spectra of the product **3ia** (162 MHz,  $\text{CDCl}_3$ ):

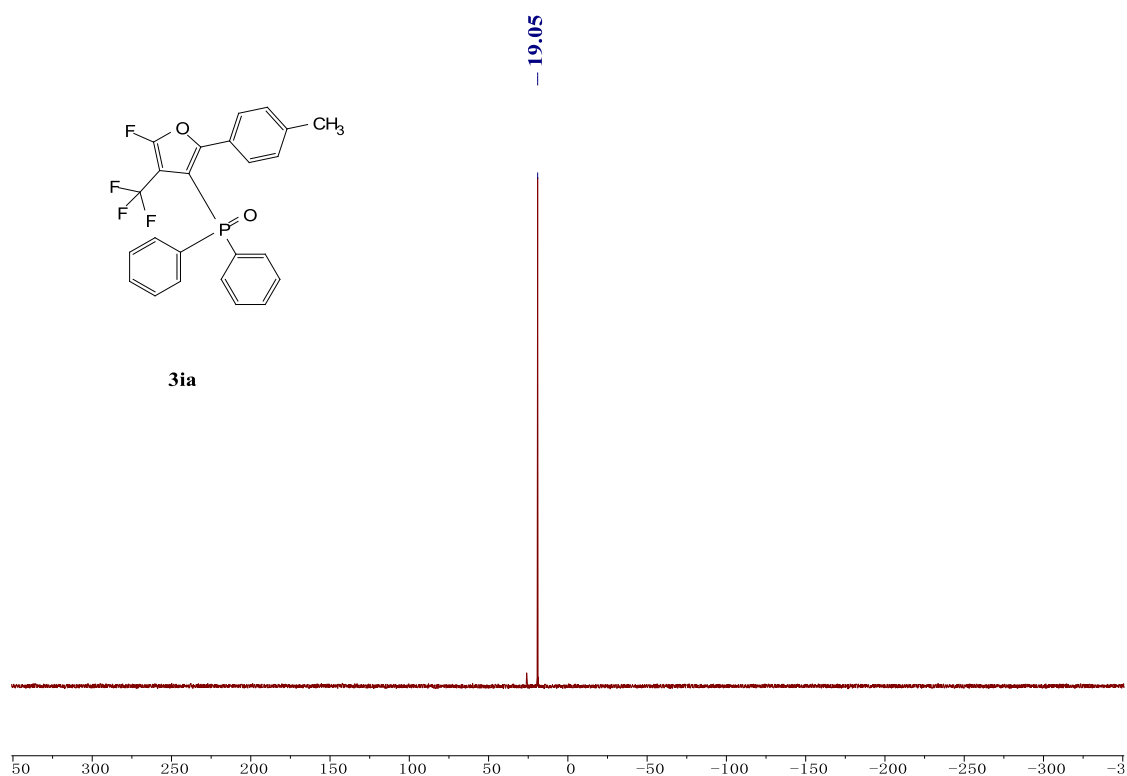

$^{13}\text{C}$  NMR spectra of the product **3ia** (100 MHz,  $\text{CDCl}_3$ ):

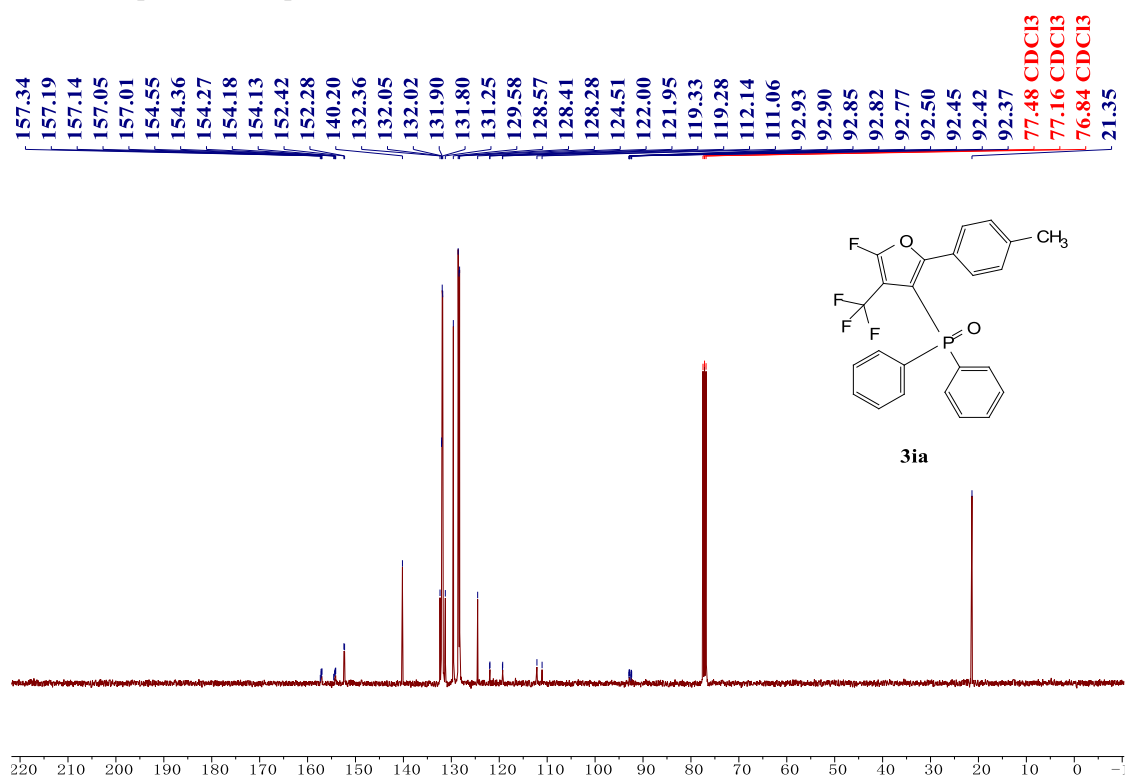

$^1\text{H}$  NMR spectra of the product **3ja** (400 MHz,  $\text{CDCl}_3$ ):

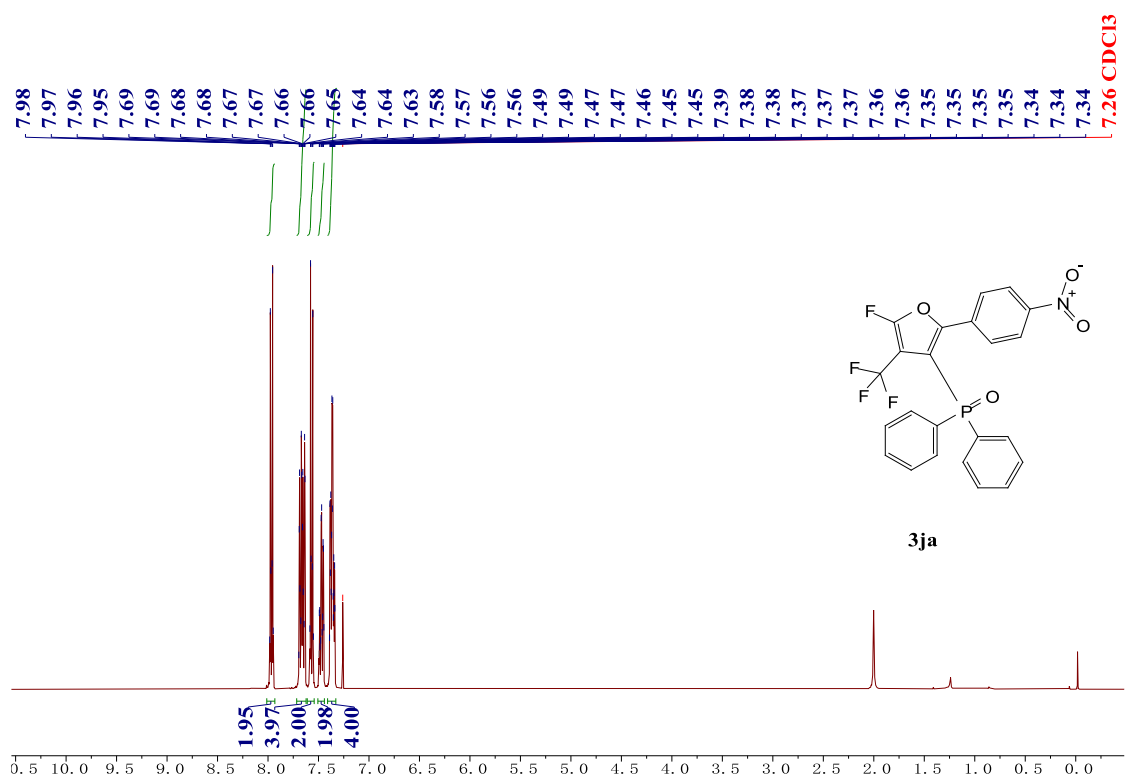

$^{19}\text{F}$  NMR spectra of the product **3ja** (376 MHz,  $\text{CDCl}_3$ ):

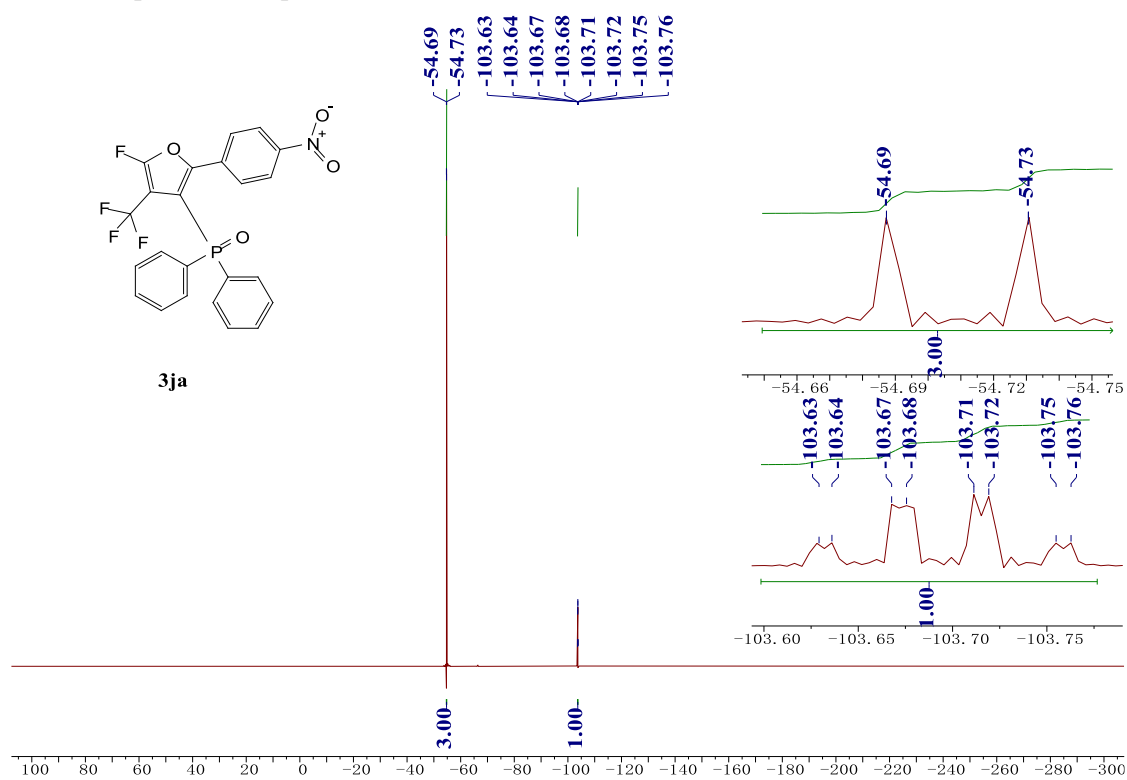

$^{31}\text{P}$  NMR spectra of the product **3ja** (162 MHz,  $\text{CDCl}_3$ ):

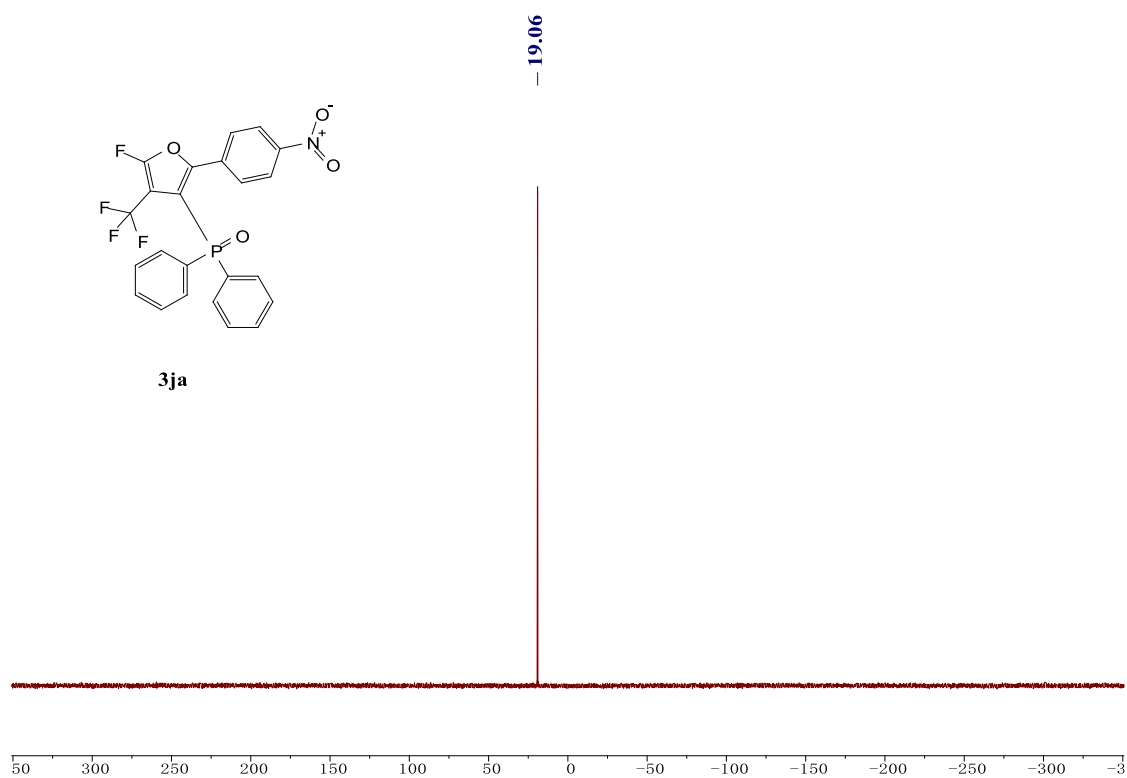

$^{13}\text{C}$  NMR spectra of the product **3ja** (100 MHz,  $\text{CDCl}_3$ ):

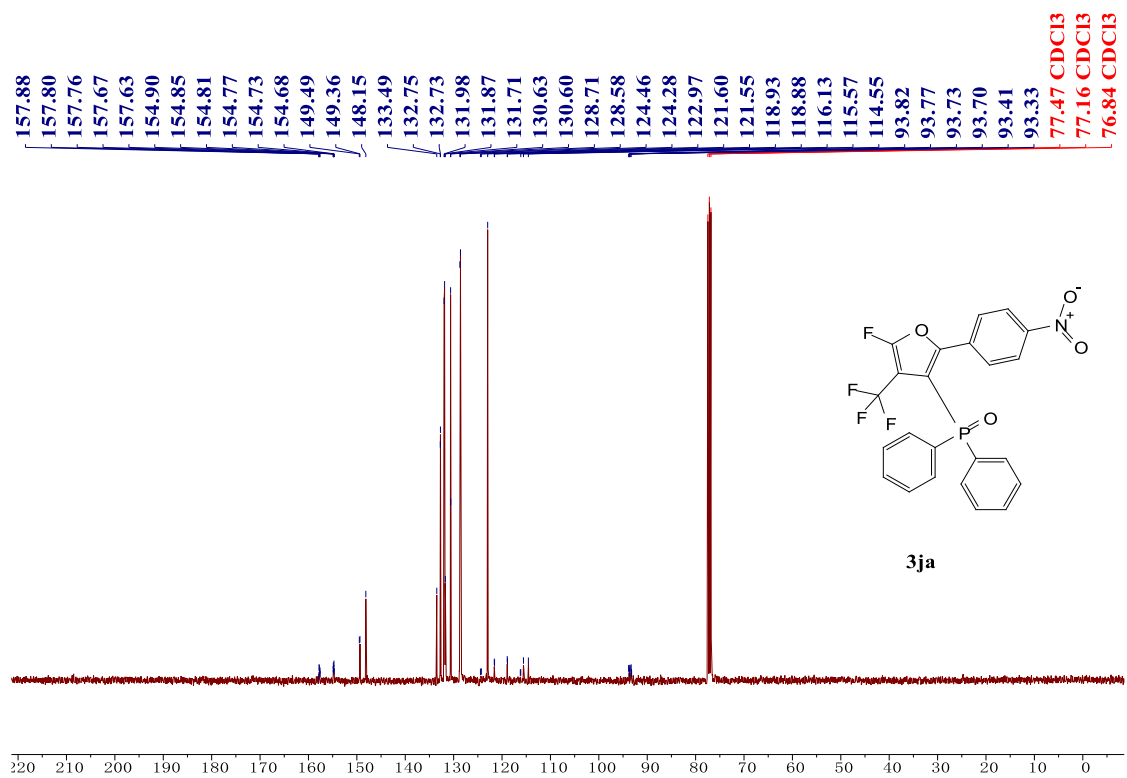



$^1\text{H}$  NMR spectra of the product **3ka** (400 MHz,  $\text{CDCl}_3$ ):

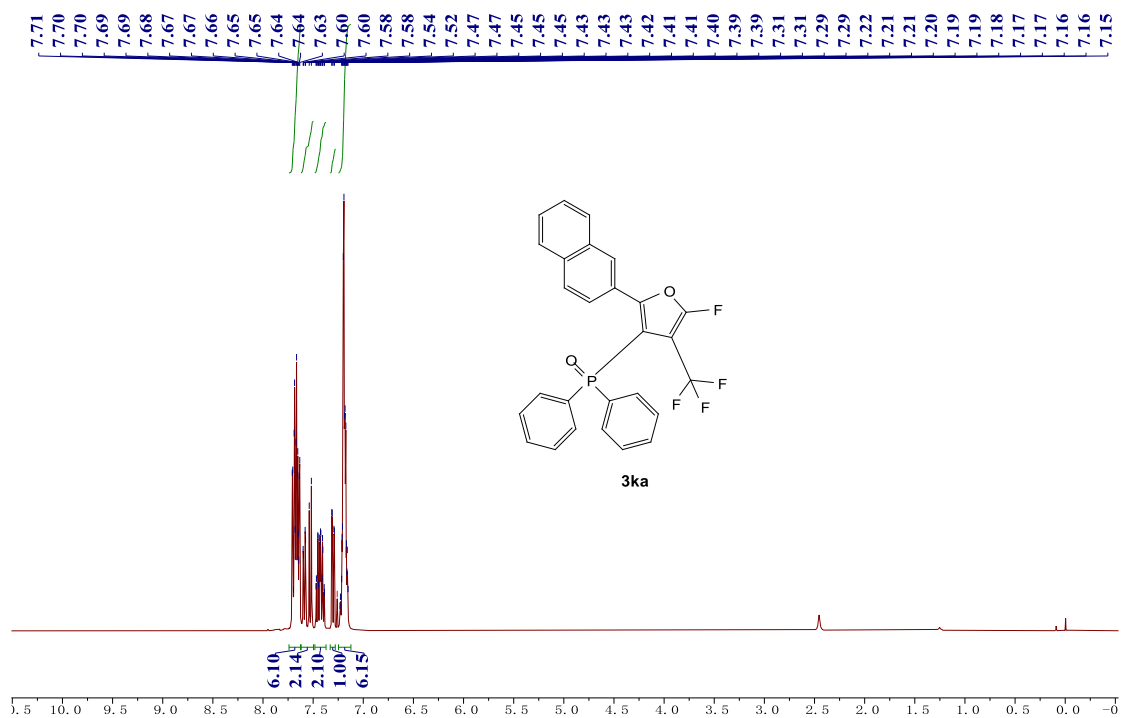

$^{19}\text{F}$  NMR spectra of the product **3ka** (376 MHz,  $\text{CDCl}_3$ ):

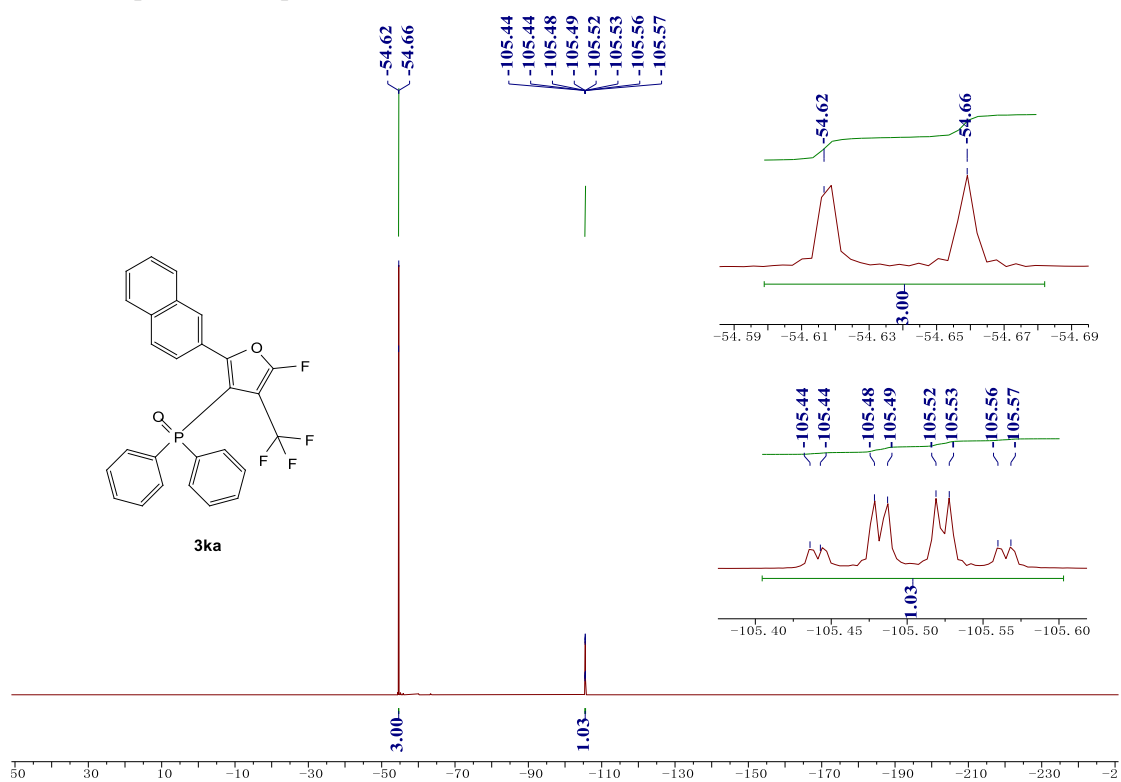

$^{31}\text{P}$  NMR spectra of the product **3ka** (162 MHz,  $\text{CDCl}_3$ ):

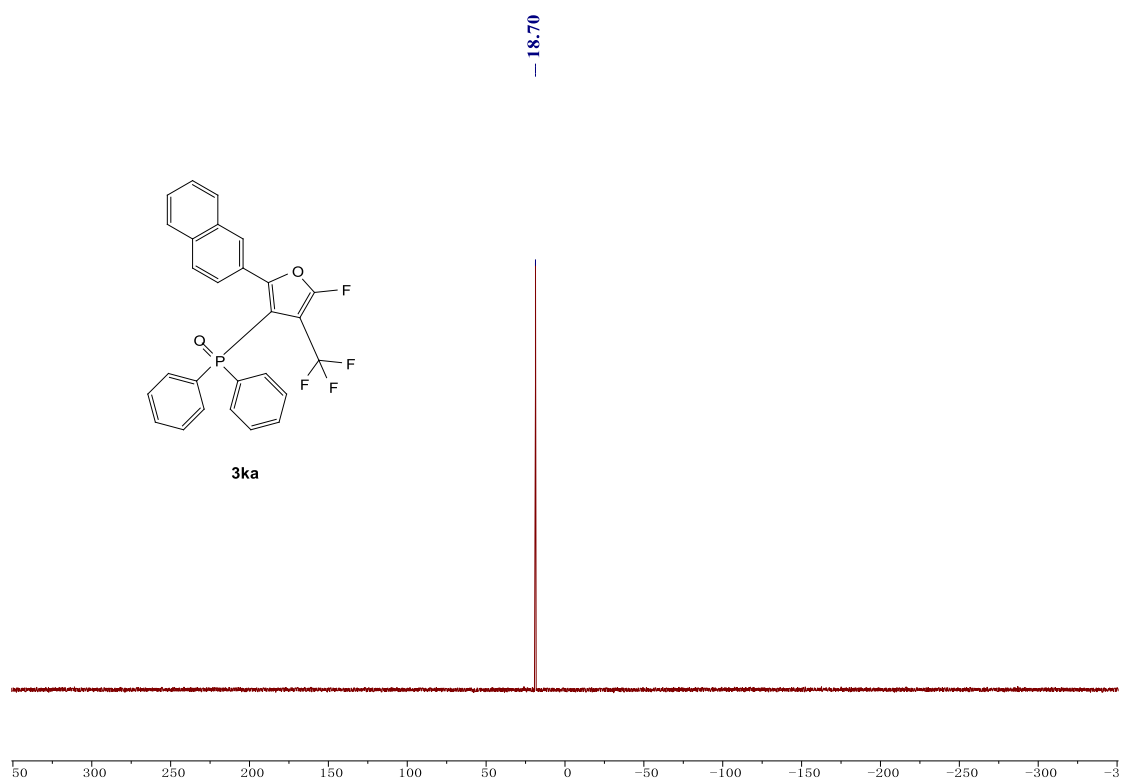

$^{13}\text{C}$  NMR spectra of the product **3ka** (100 MHz,  $\text{CDCl}_3$ ):

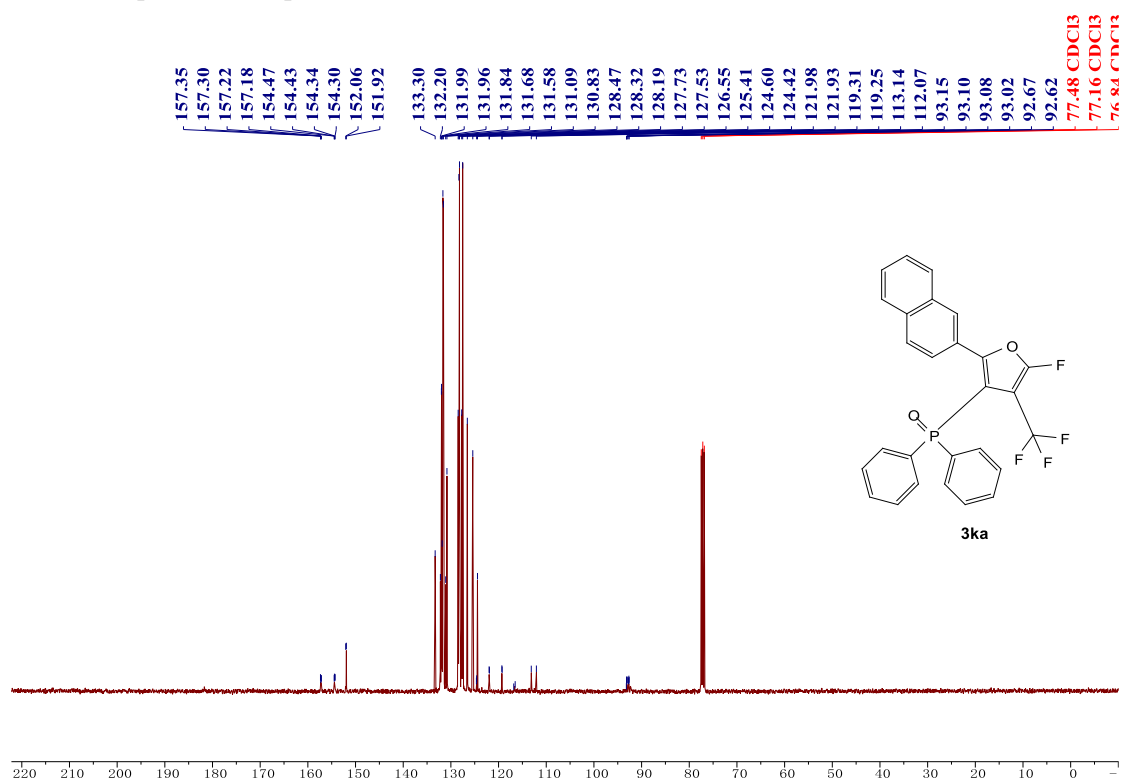

$^1\text{H}$  NMR spectra of the product **3la** (400 MHz,  $\text{CDCl}_3$ ):

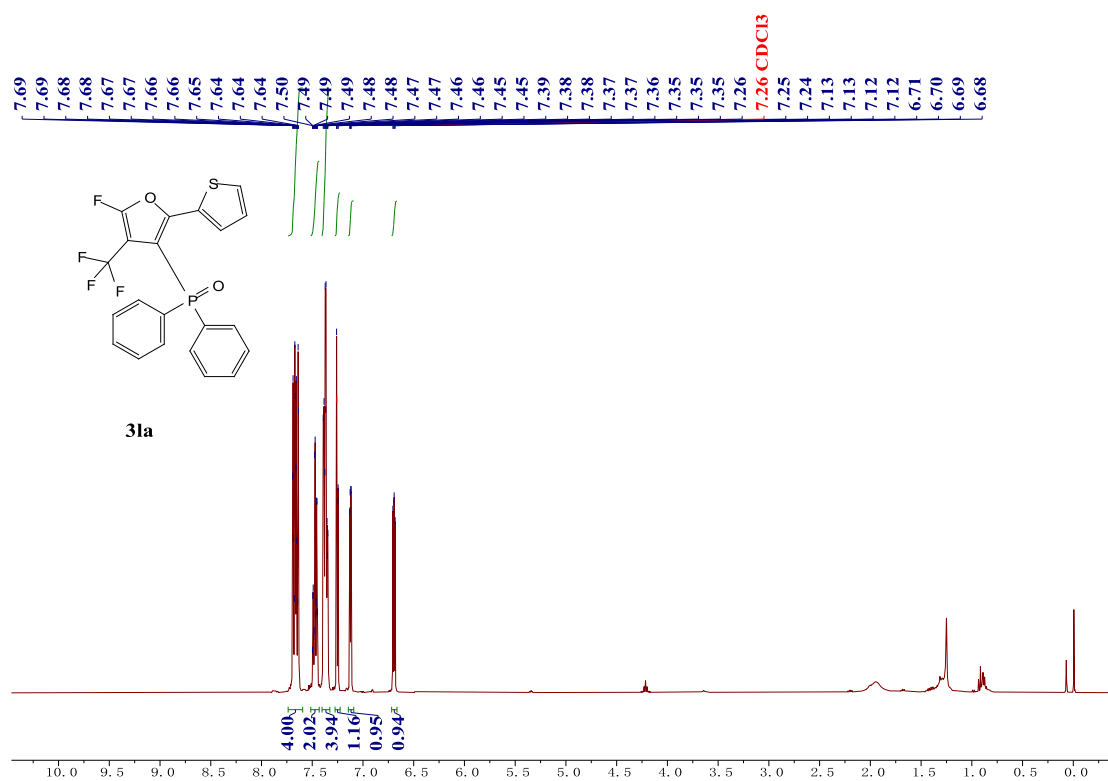

$^{19}\text{F}$  NMR spectra of the product **3la** (376 MHz,  $\text{CDCl}_3$ ):

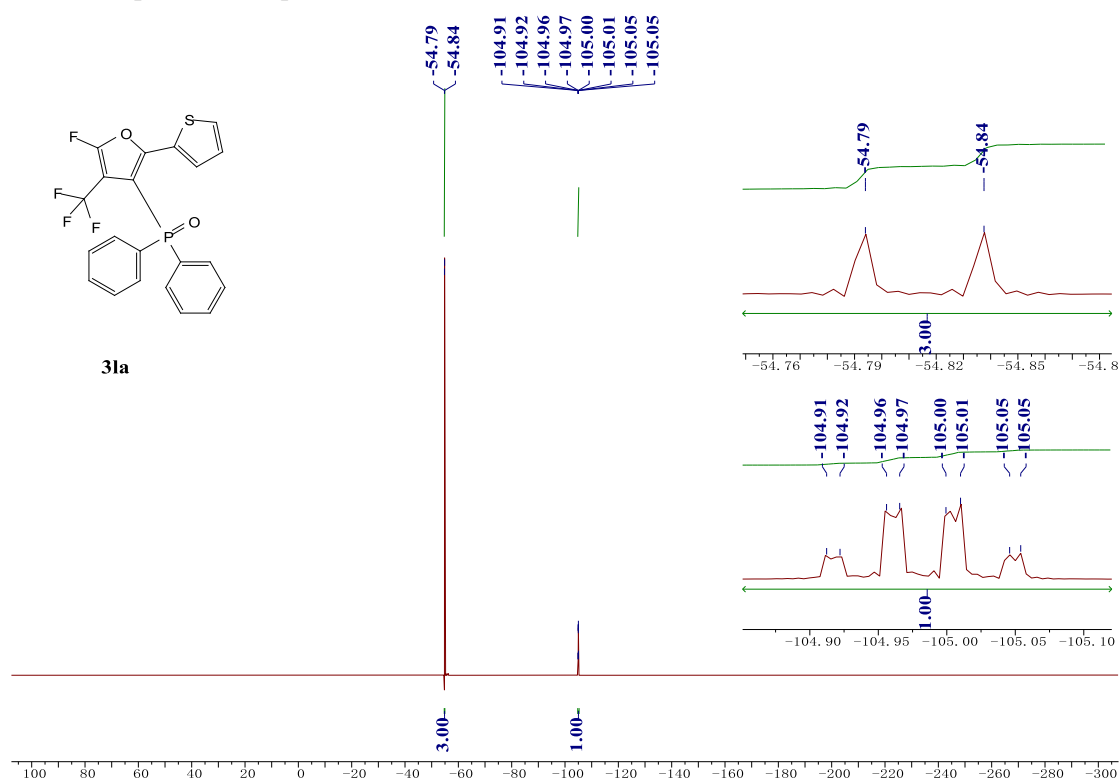

$^{31}\text{P}$  NMR spectra of the product **3la** (162 MHz,  $\text{CDCl}_3$ ):

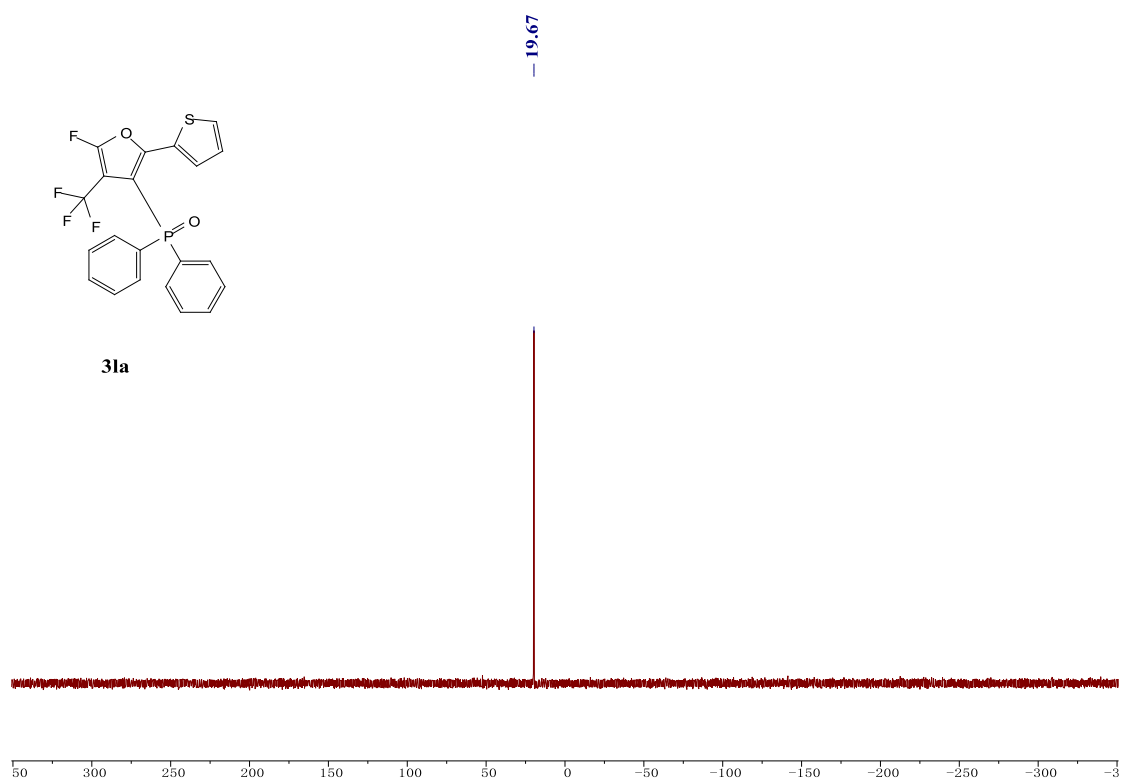

$^{13}\text{C}$  NMR spectra of the product **3la** (100 MHz,  $\text{CDCl}_3$ ):

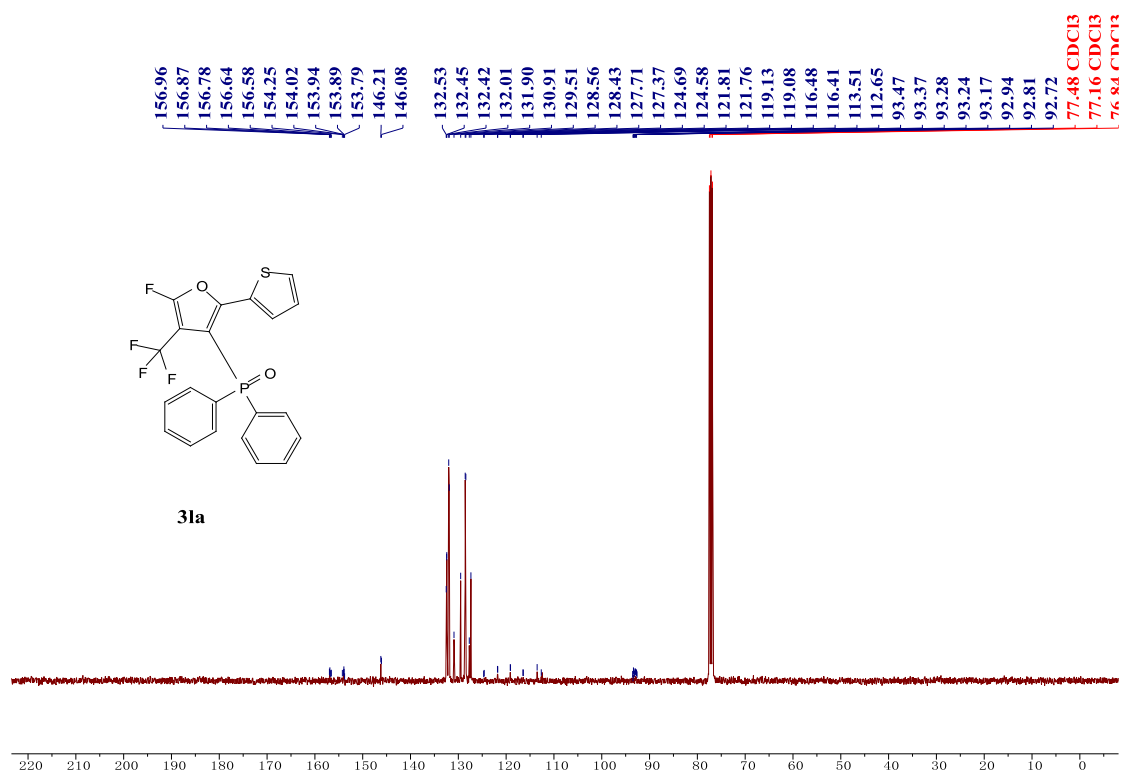

$^1\text{H}$  NMR spectra of the product **3ma** (400 MHz,  $\text{CDCl}_3$ ):

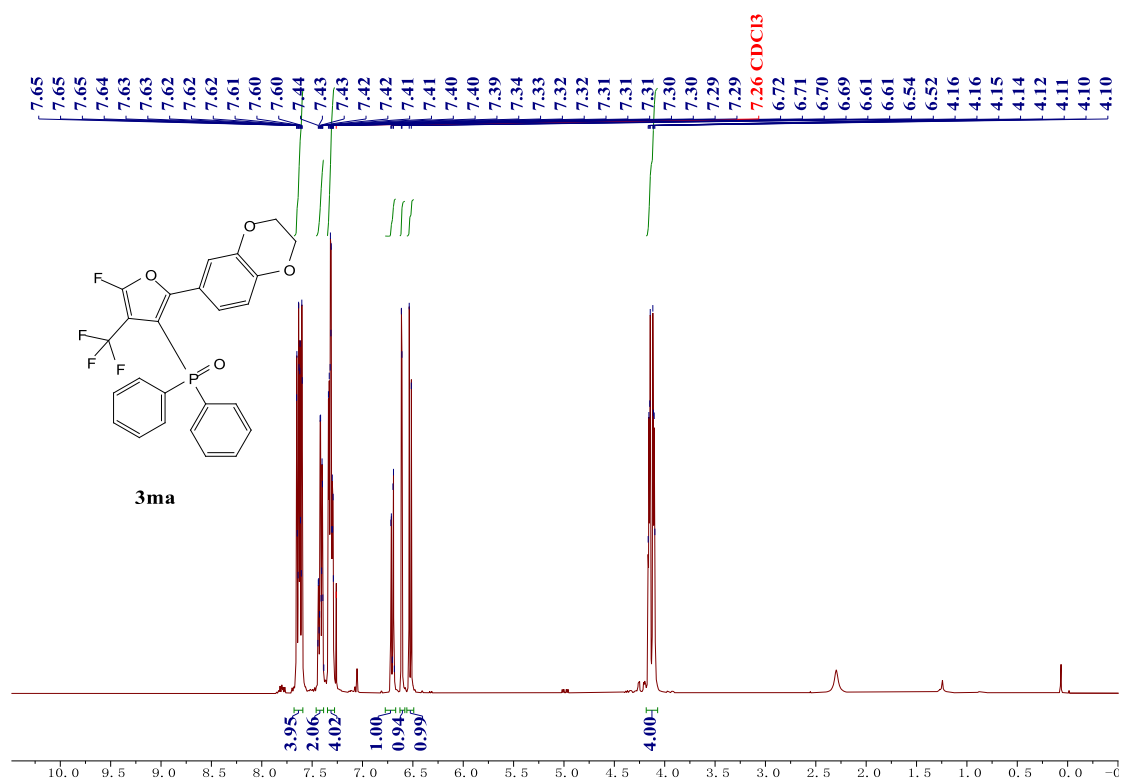

$^{19}\text{F}$  NMR spectra of the product **3ma** (376 MHz,  $\text{CDCl}_3$ ):

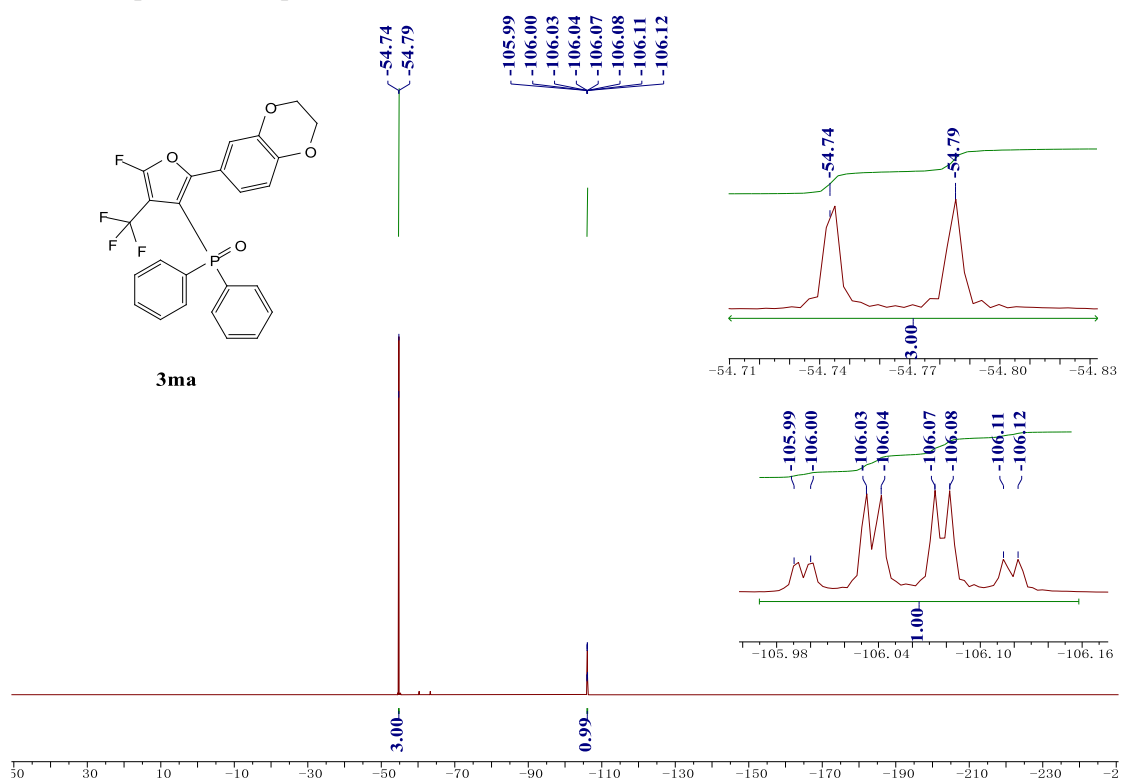

$^{31}\text{P}$  NMR spectra of the product **3ma** (162 MHz,  $\text{CDCl}_3$ ):

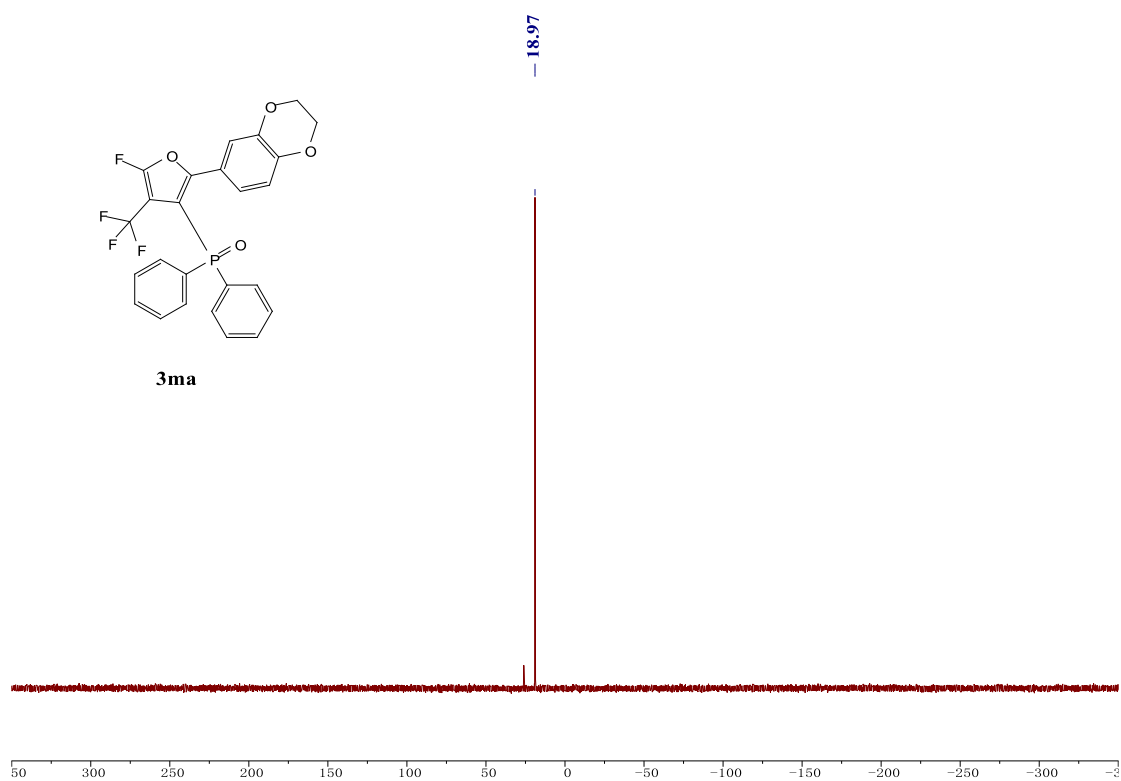

$^{13}\text{C}$  NMR spectra of the product **3ma** (100 MHz,  $\text{CDCl}_3$ ):

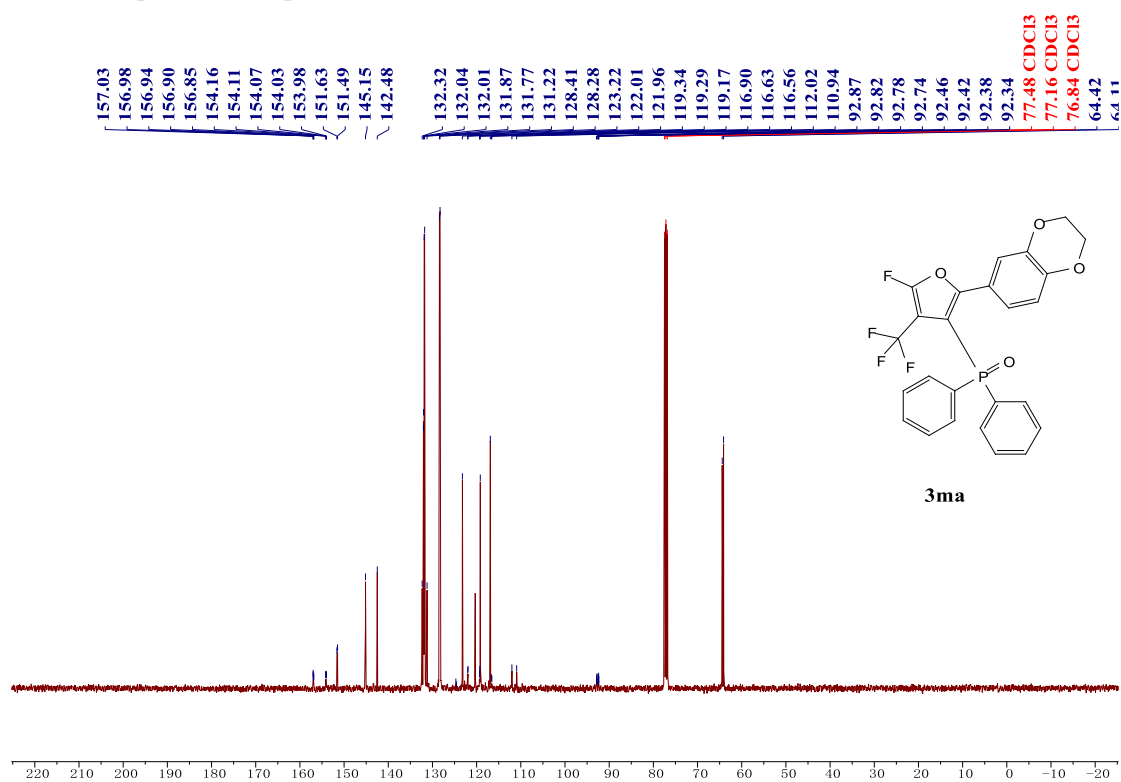

$^1\text{H}$  NMR spectra of the product **3na** (400 MHz,  $\text{CDCl}_3$ ):

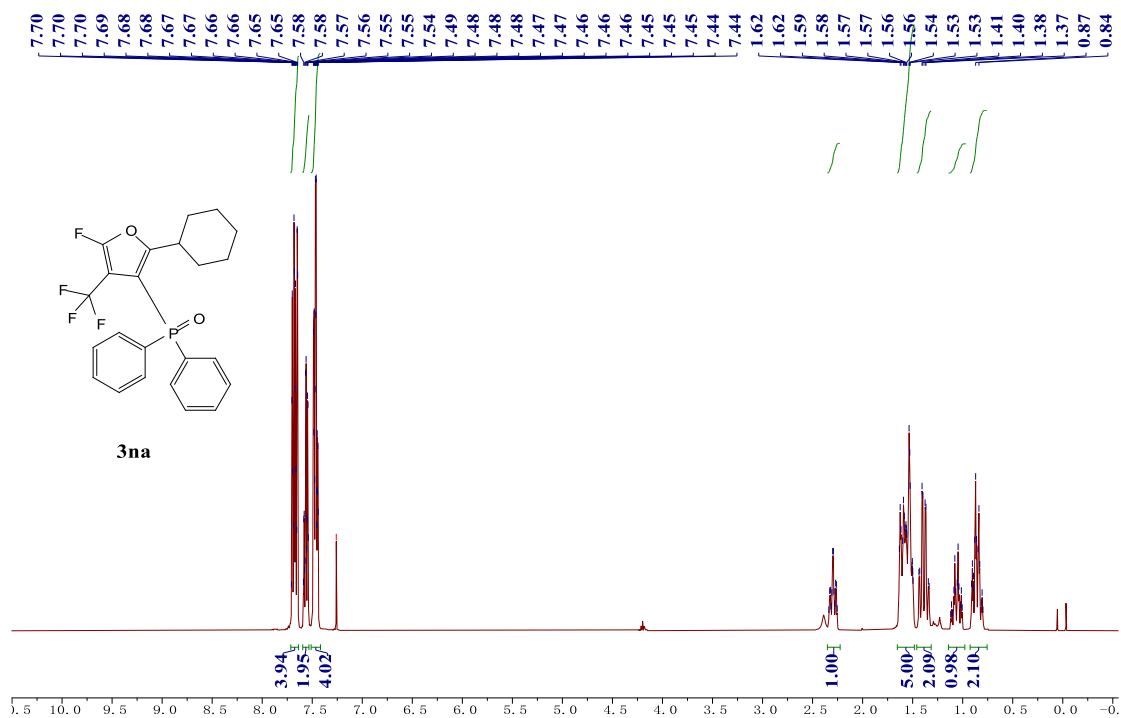

$^{19}\text{F}$  NMR spectra of the product **3na** (376 MHz,  $\text{CDCl}_3$ ):

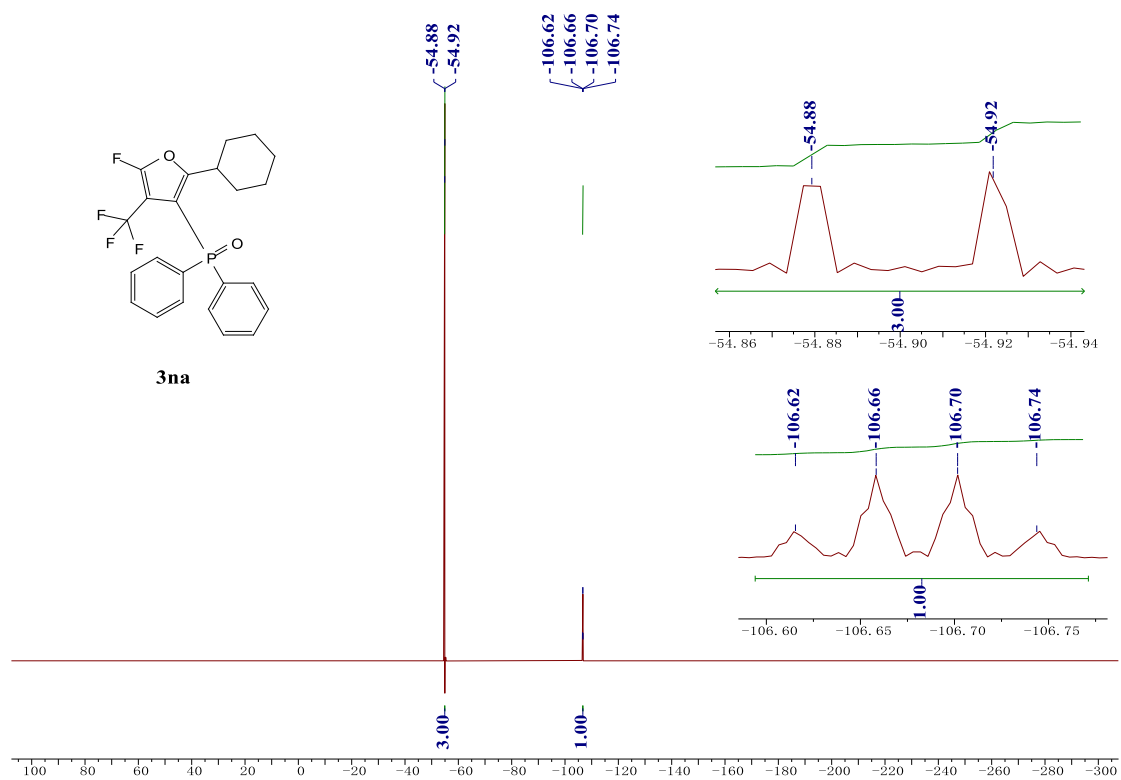

$^{31}\text{P}$  NMR spectra of the product **3na** (162 MHz,  $\text{CDCl}_3$ ):

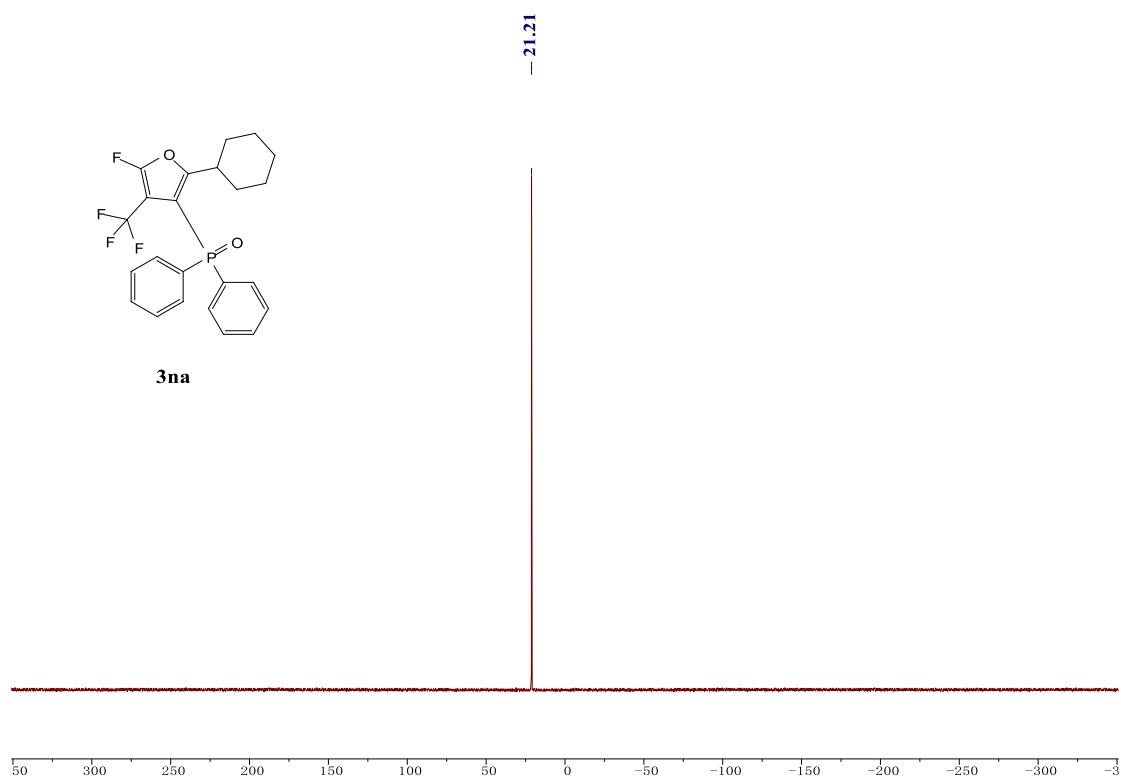

$^{13}\text{C}$  NMR spectra of the product **3na** (100 MHz,  $\text{CDCl}_3$ ):

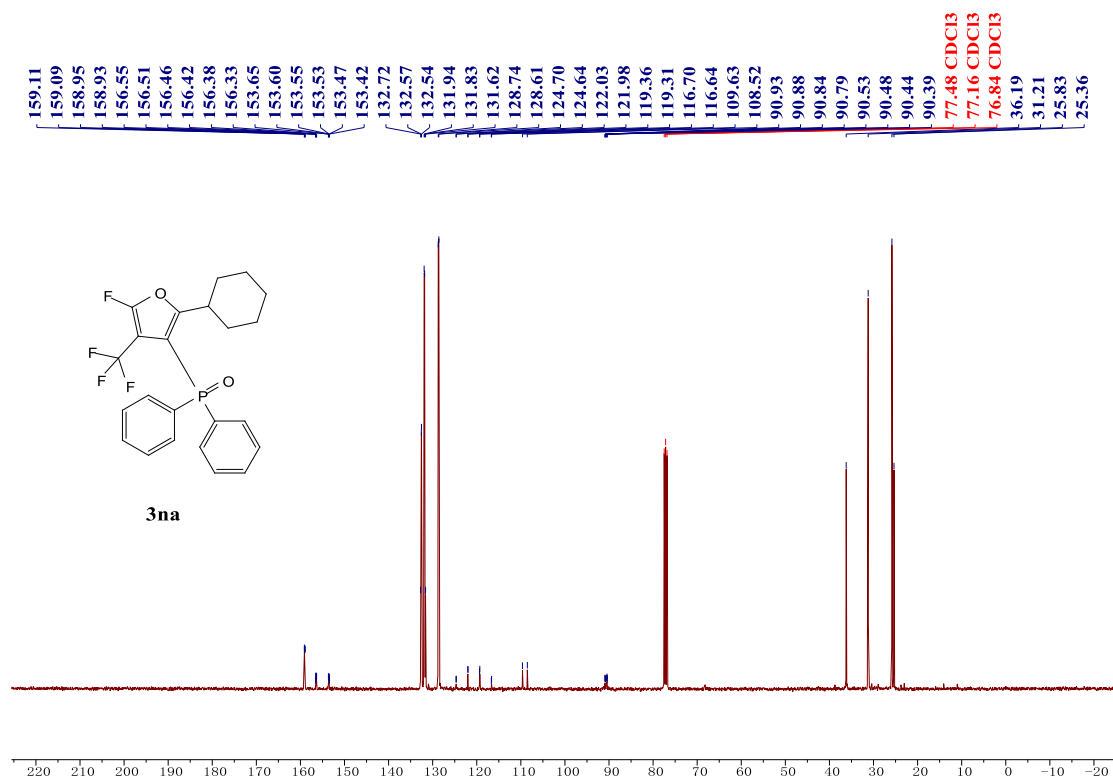



$^1\text{H}$  NMR spectra of the product **30a** (400 MHz,  $\text{CDCl}_3$ ):

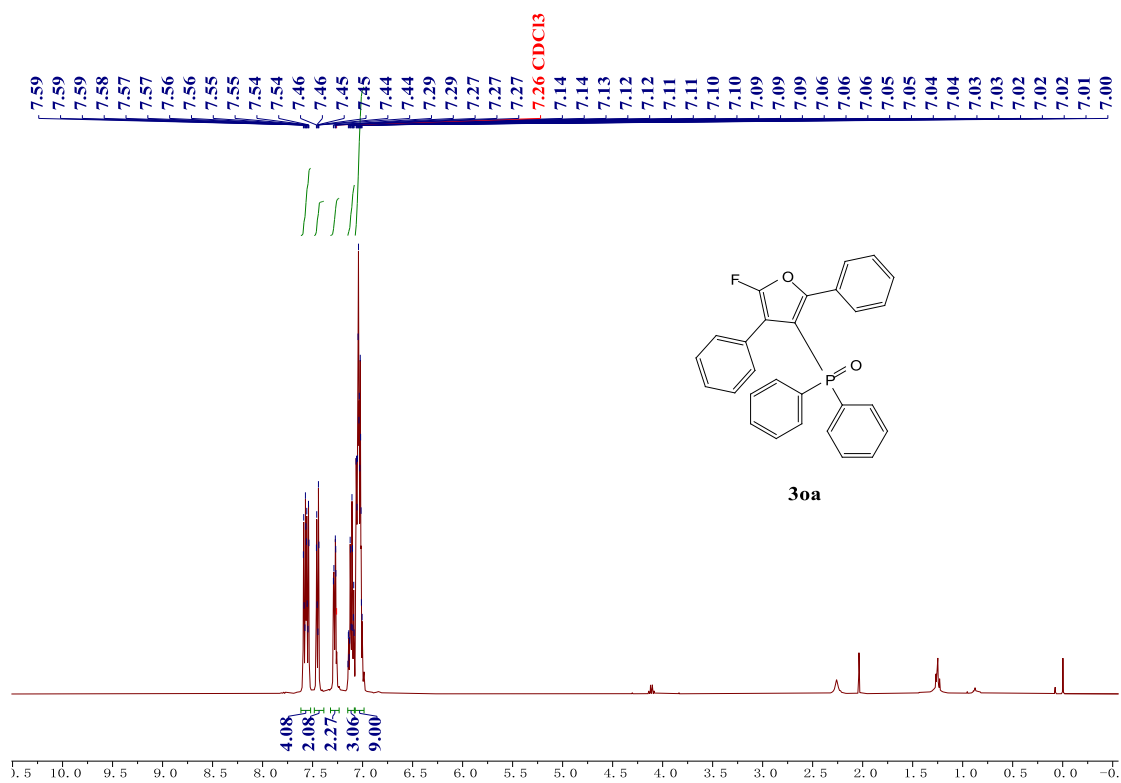

$^{19}\text{F}$  NMR spectra of the product **30a** (376 MHz,  $\text{CDCl}_3$ ):

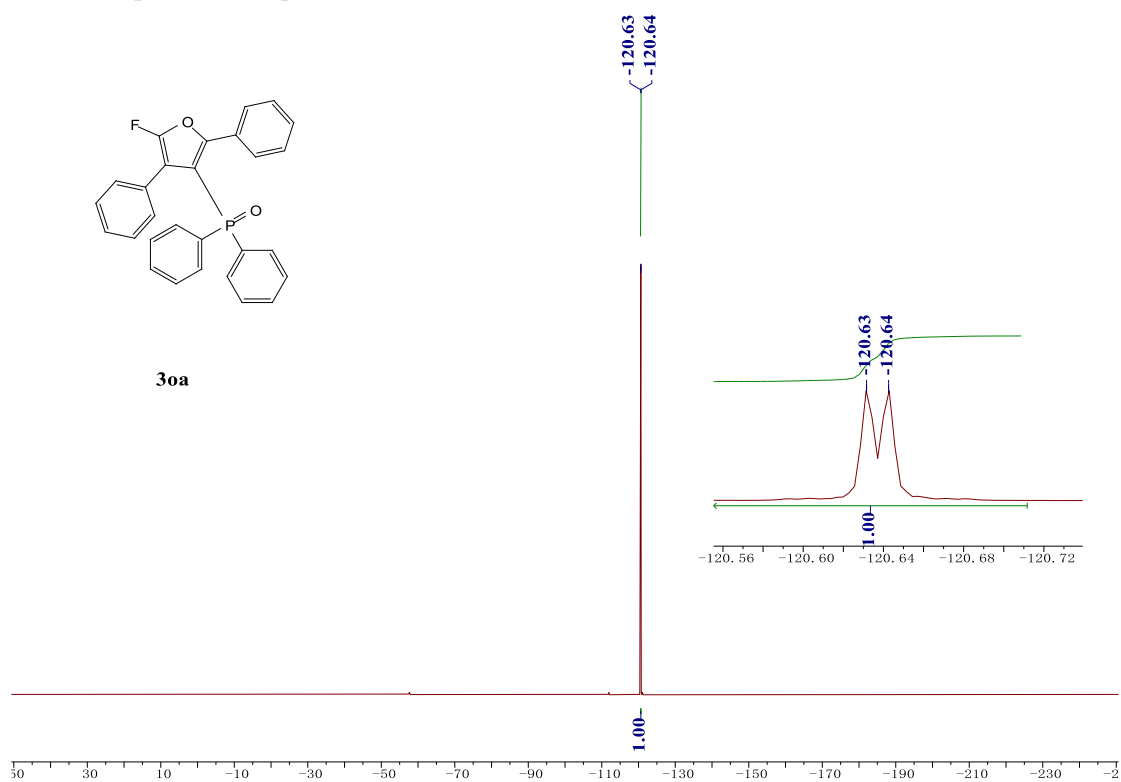

$^{31}\text{P}$  NMR spectra of the product **30a** (162 MHz,  $\text{CDCl}_3$ ):

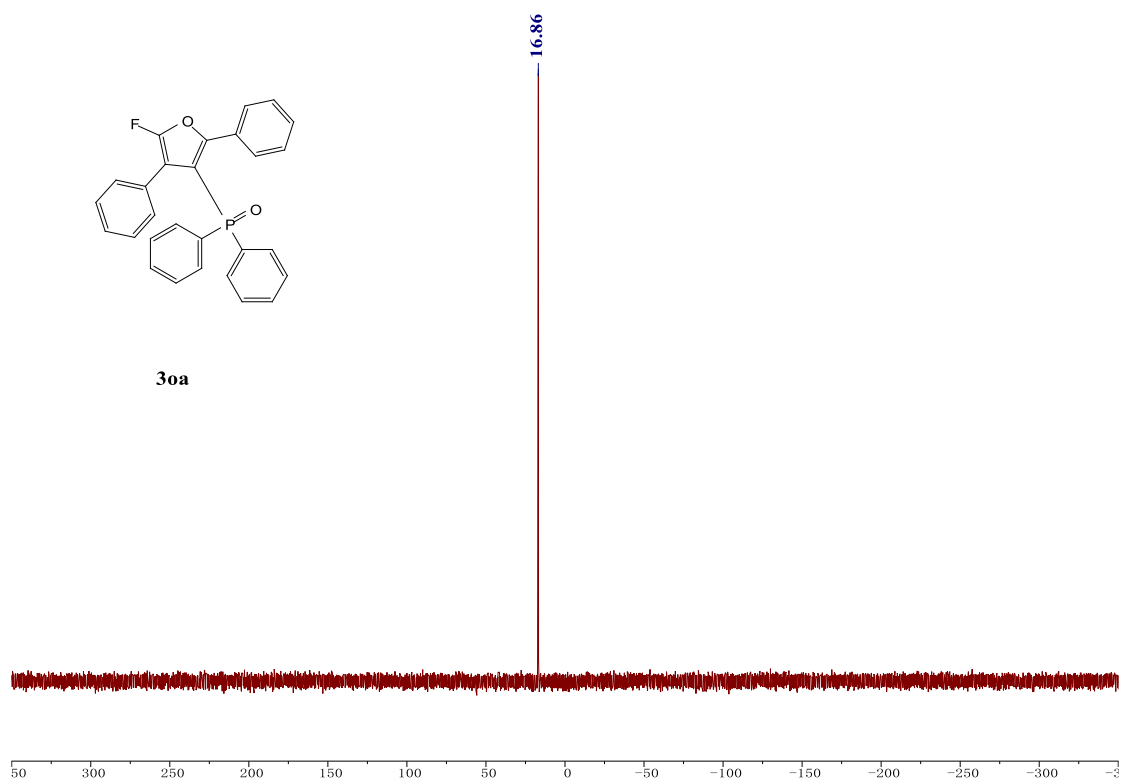

$^{13}\text{C}$  NMR spectra of the product **30a** (100 MHz,  $\text{CDCl}_3$ ):

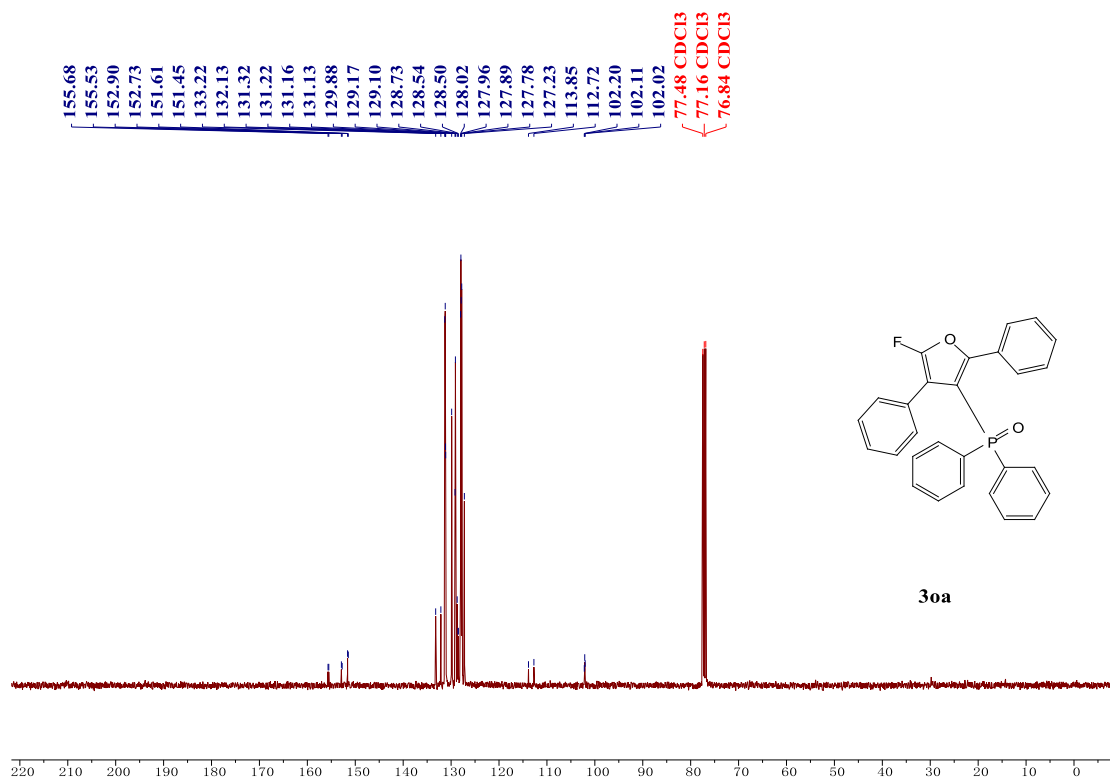

$^1\text{H}$  NMR spectra of the product **3pa** (400 MHz,  $\text{CDCl}_3$ ):

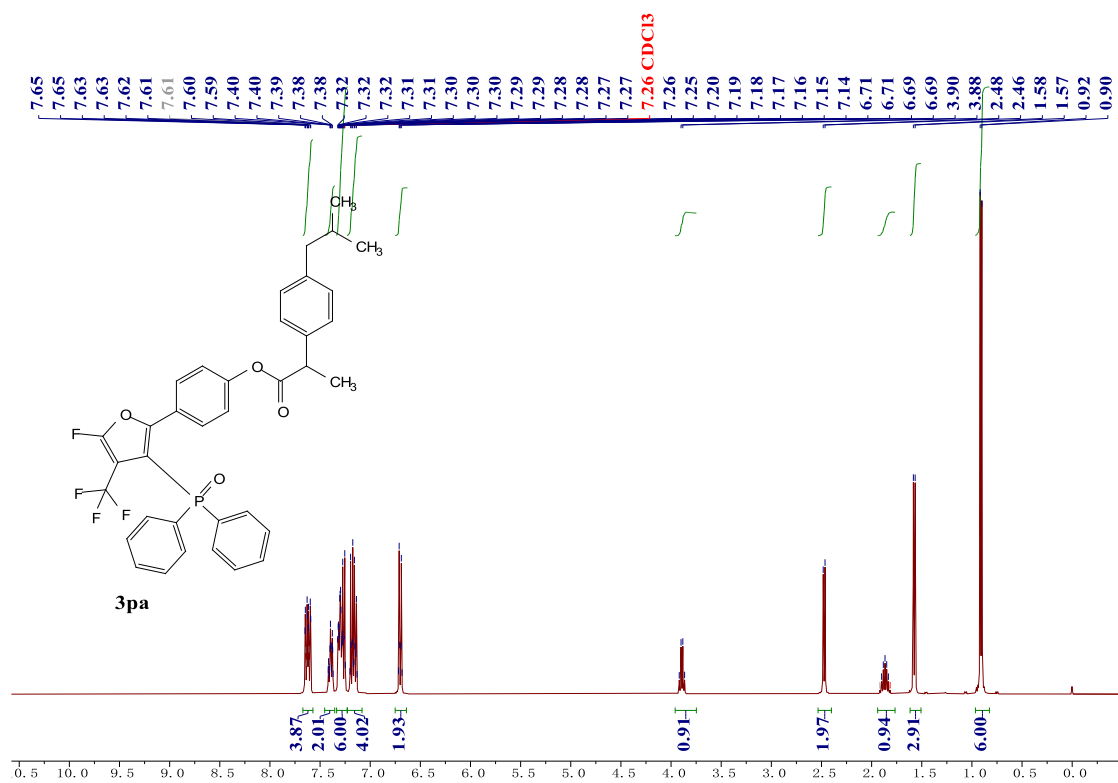

$^{19}\text{F}$  NMR spectra of the product **3pa** (376 MHz,  $\text{CDCl}_3$ ):

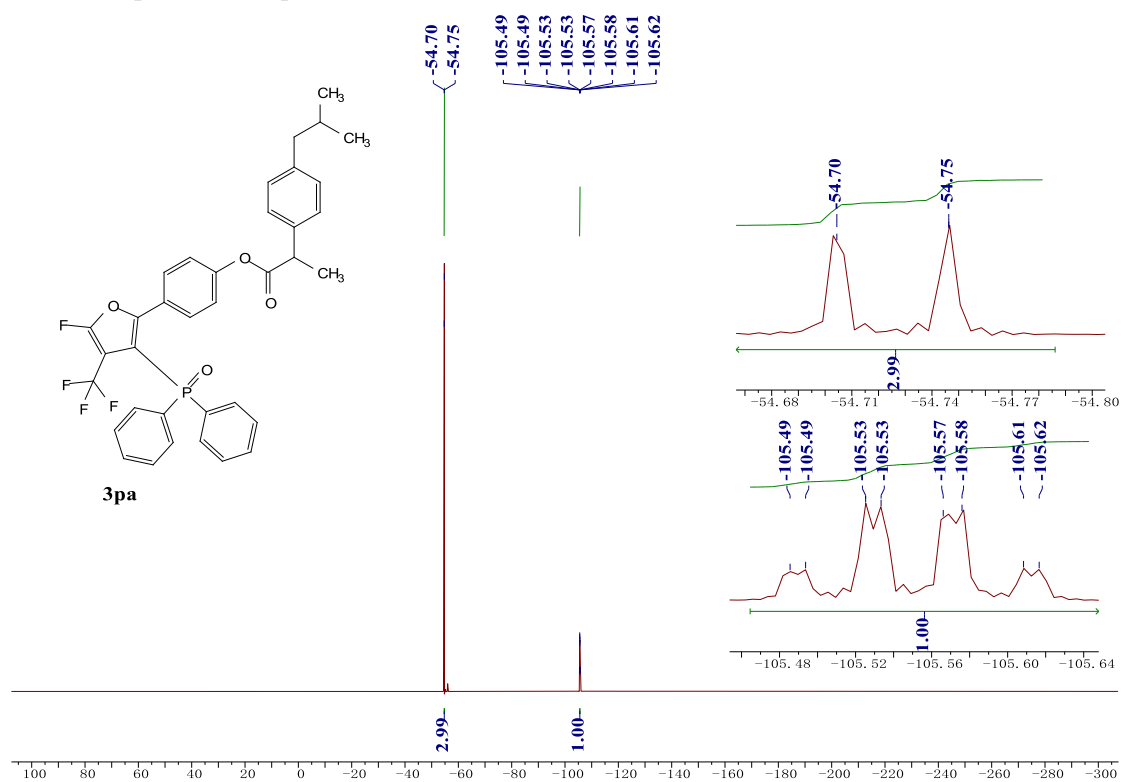

$^{31}\text{P}$  NMR spectra of the product **3pa** (162 MHz,  $\text{CDCl}_3$ ):

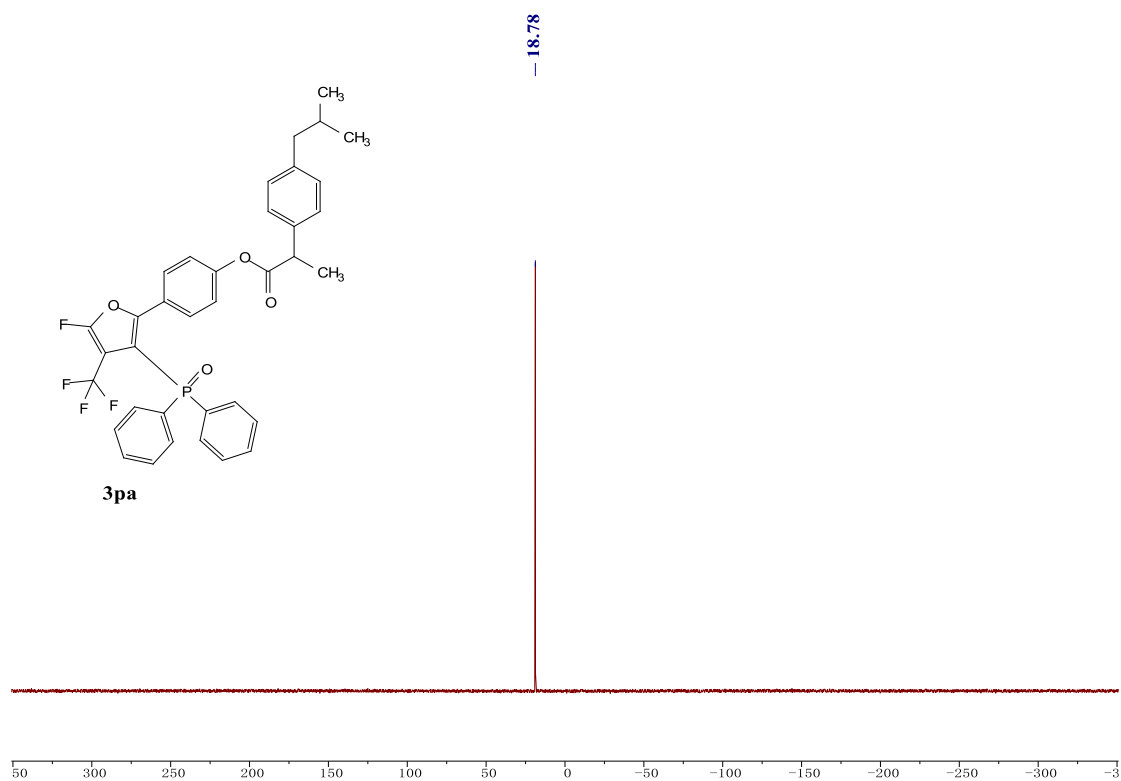

$^{13}\text{C}$  NMR spectra of the product **3pa** (100 MHz,  $\text{CDCl}_3$ ):

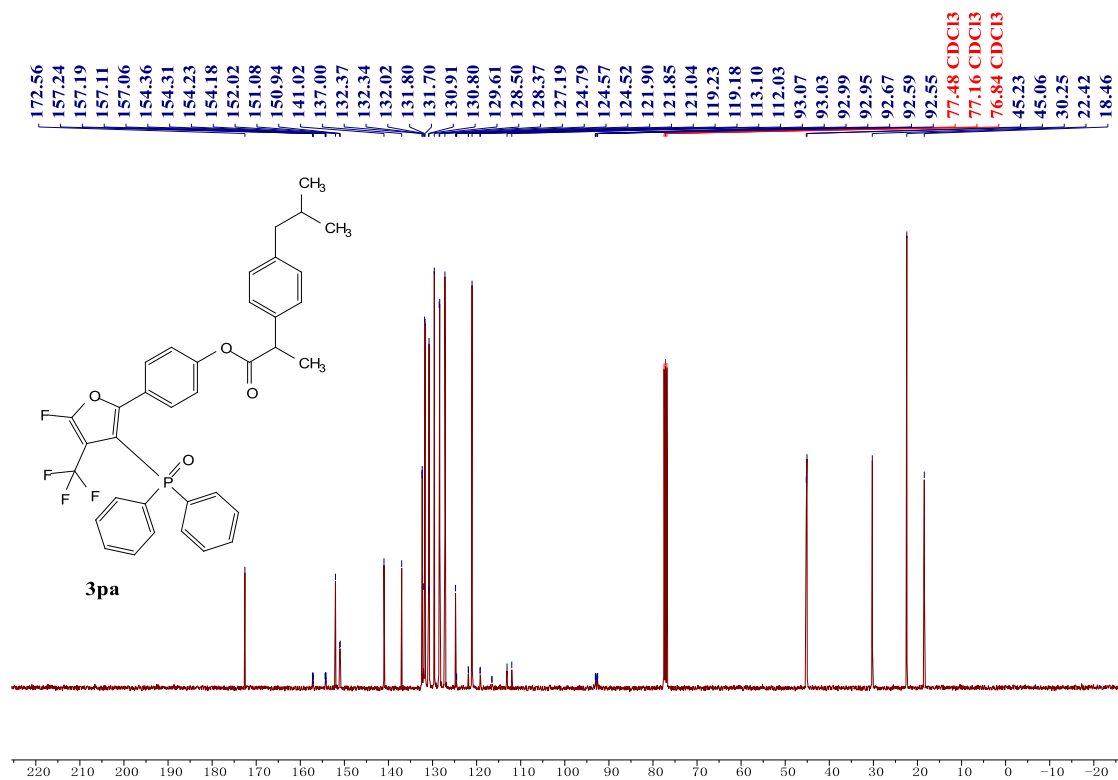

$^1\text{H}$  NMR spectra of the product **3qa** (400 MHz,  $\text{CDCl}_3$ ):

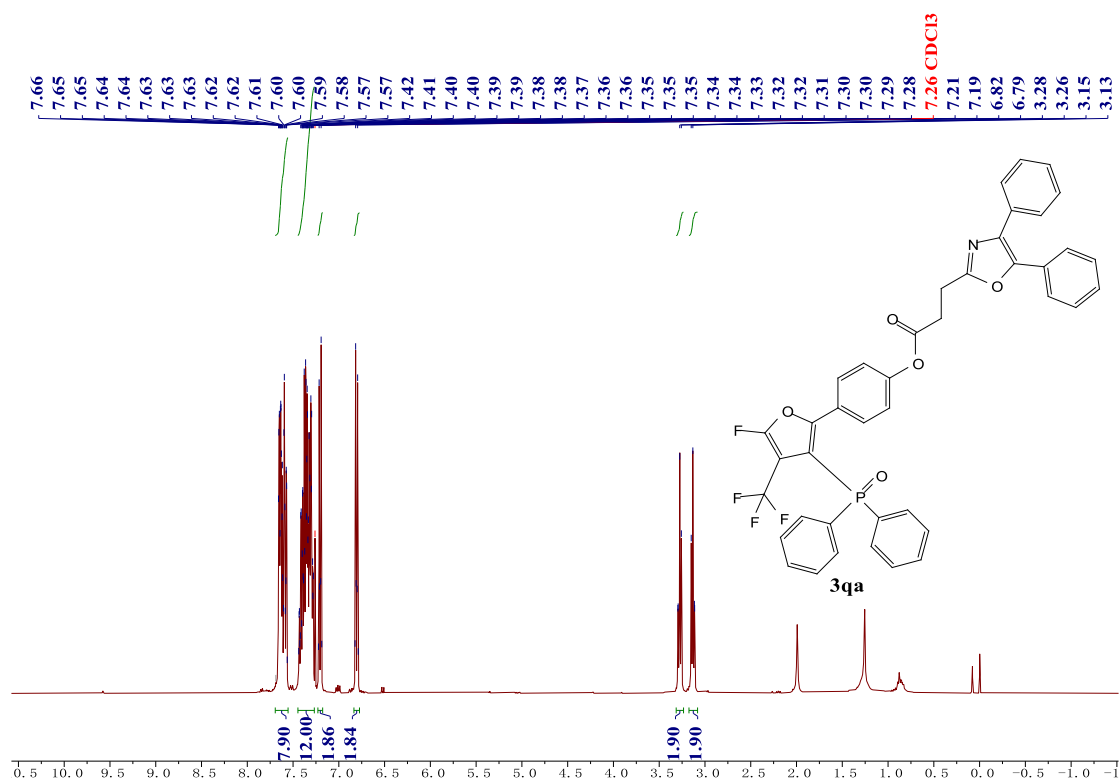

$^{19}\text{F}$  NMR spectra of the product **3qa** (376 MHz,  $\text{CDCl}_3$ ):

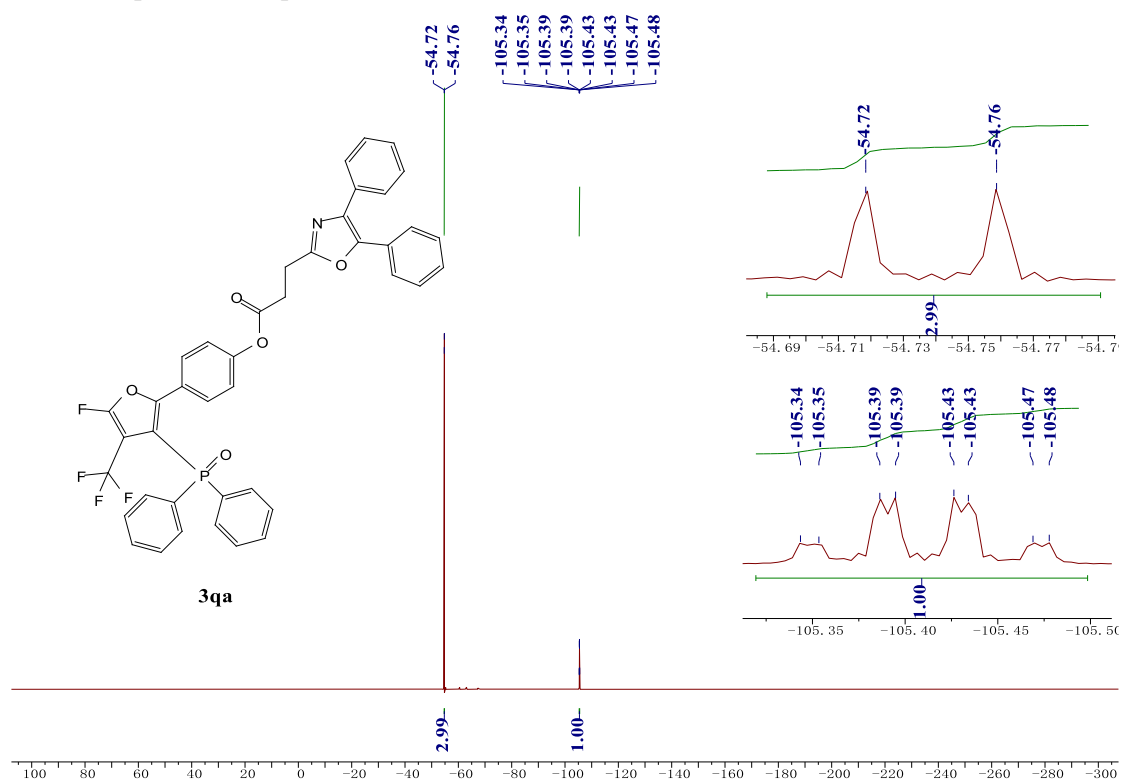

$^{31}\text{P}$  NMR spectra of the product **3qa** (162 MHz,  $\text{CDCl}_3$ ):

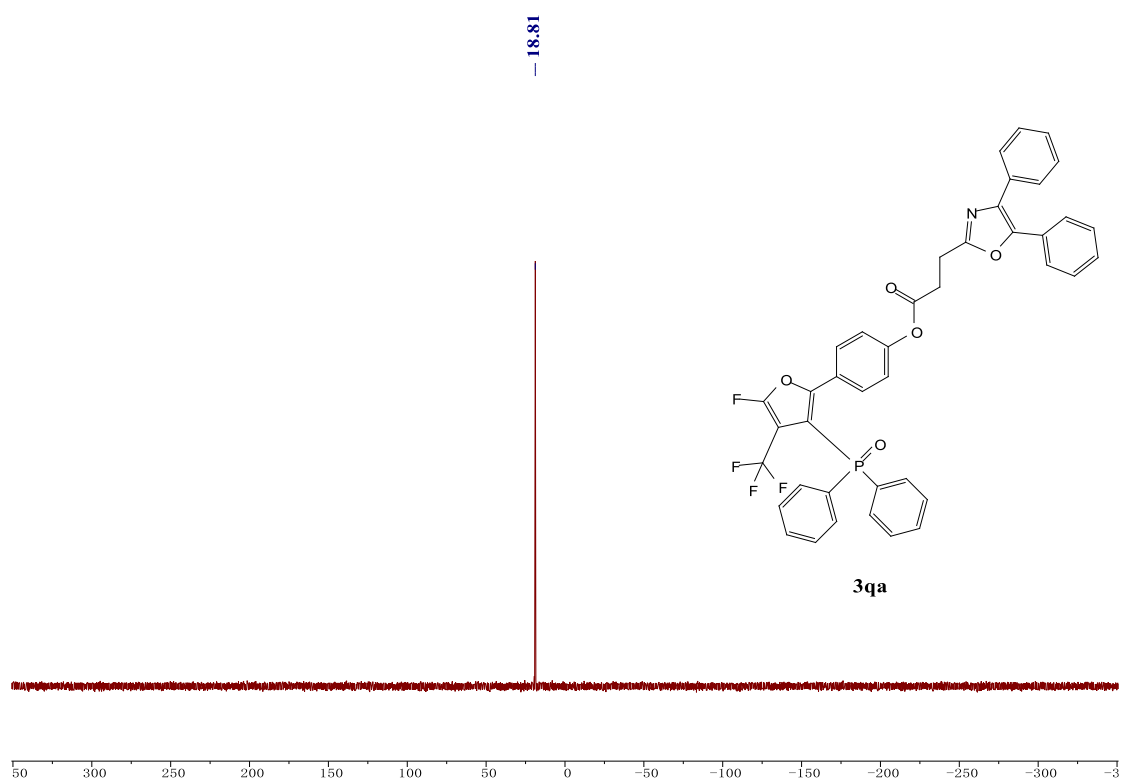

$^{13}\text{C}$  NMR spectra of the product **3qa** (100 MHz,  $\text{CDCl}_3$ ):

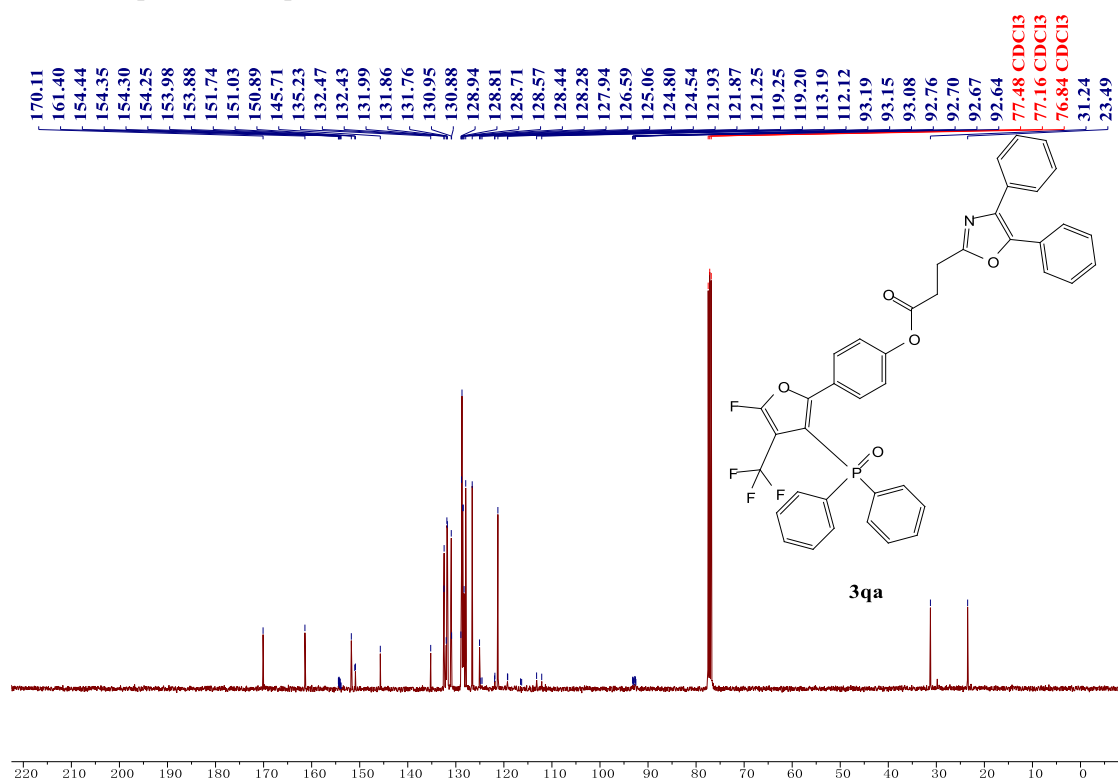

$^1\text{H}$  NMR spectra of the product **4** (400 MHz,  $\text{CDCl}_3$ ):

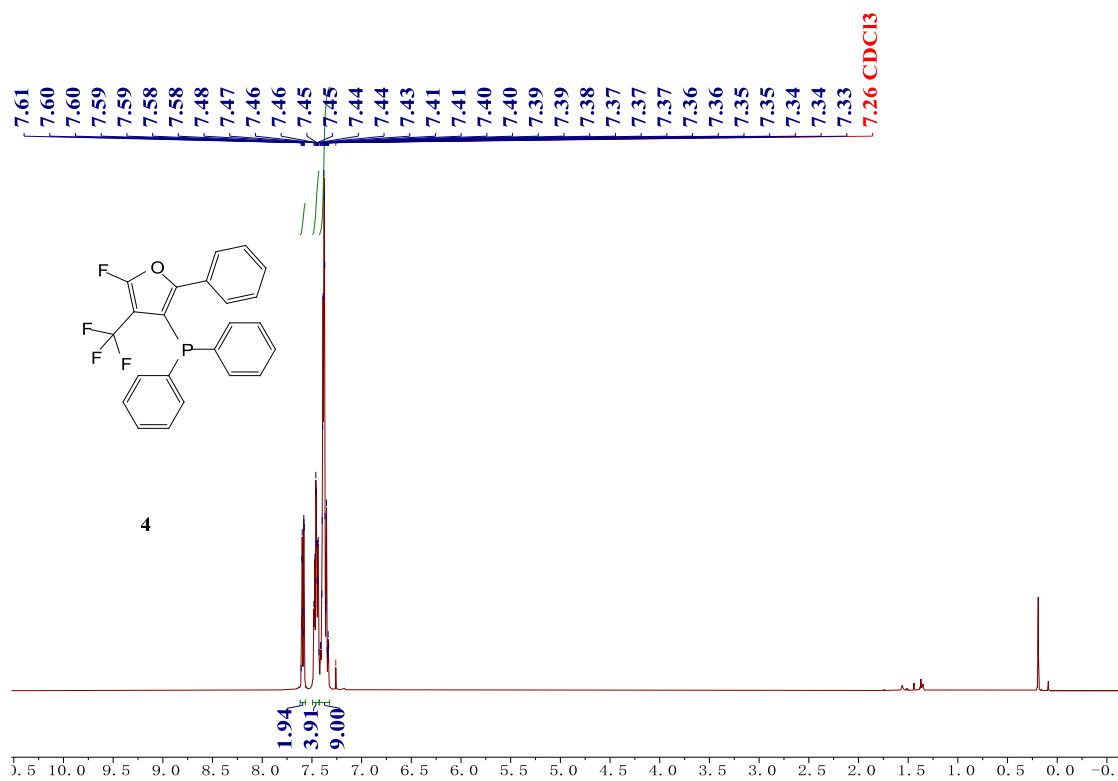

$^{19}\text{F}$  NMR spectra of the product **4** (376 MHz,  $\text{CDCl}_3$ ):

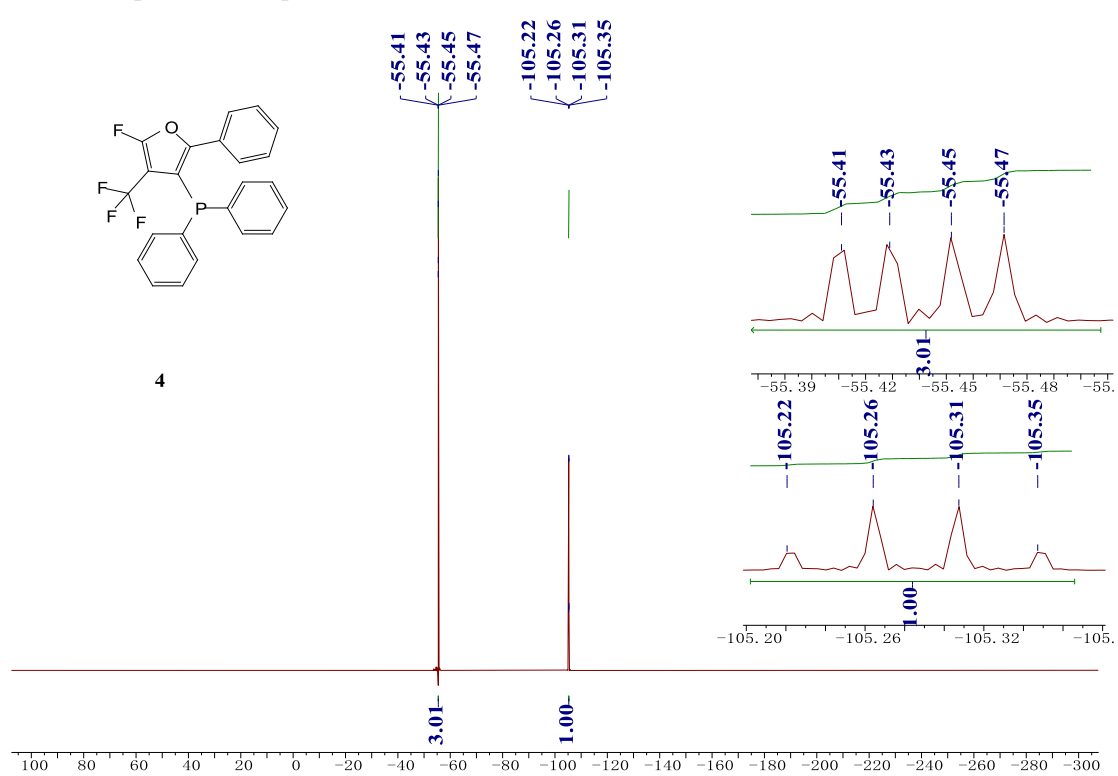

$^{31}\text{P}$  NMR spectra of the product **4** (162 MHz,  $\text{CDCl}_3$ ):

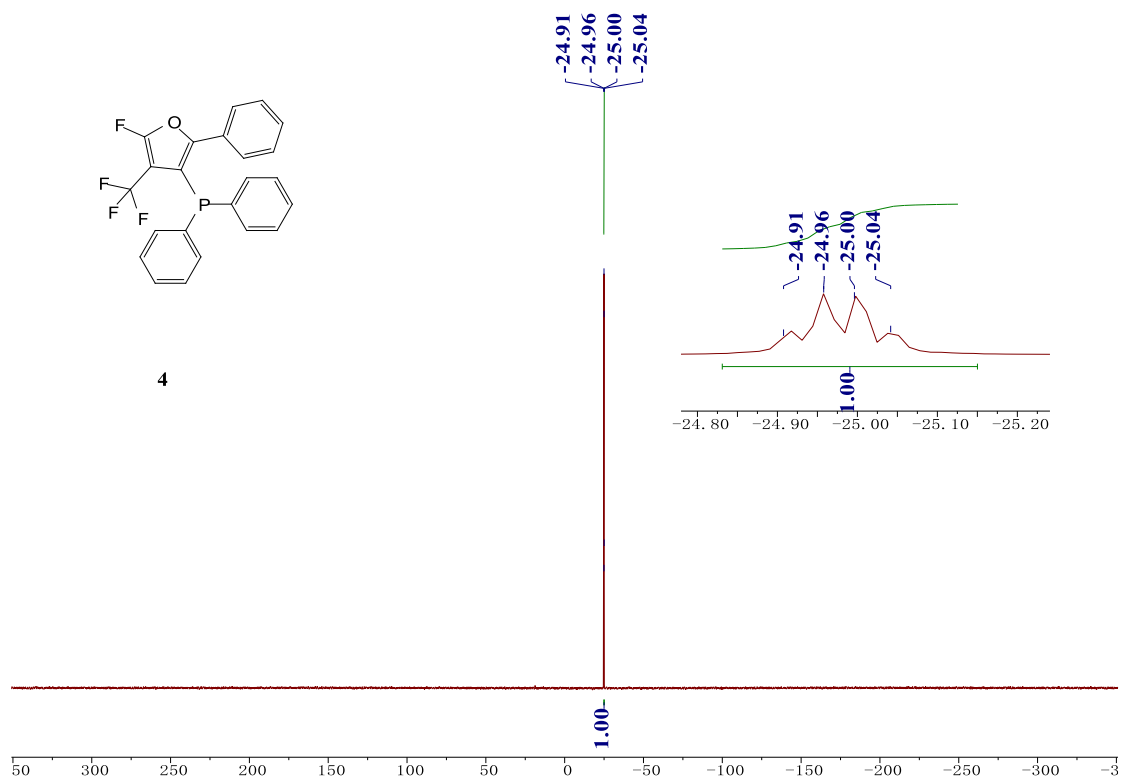

$^{13}\text{C}$  NMR spectra of the product **4** (100 MHz,  $\text{CDCl}_3$ ):

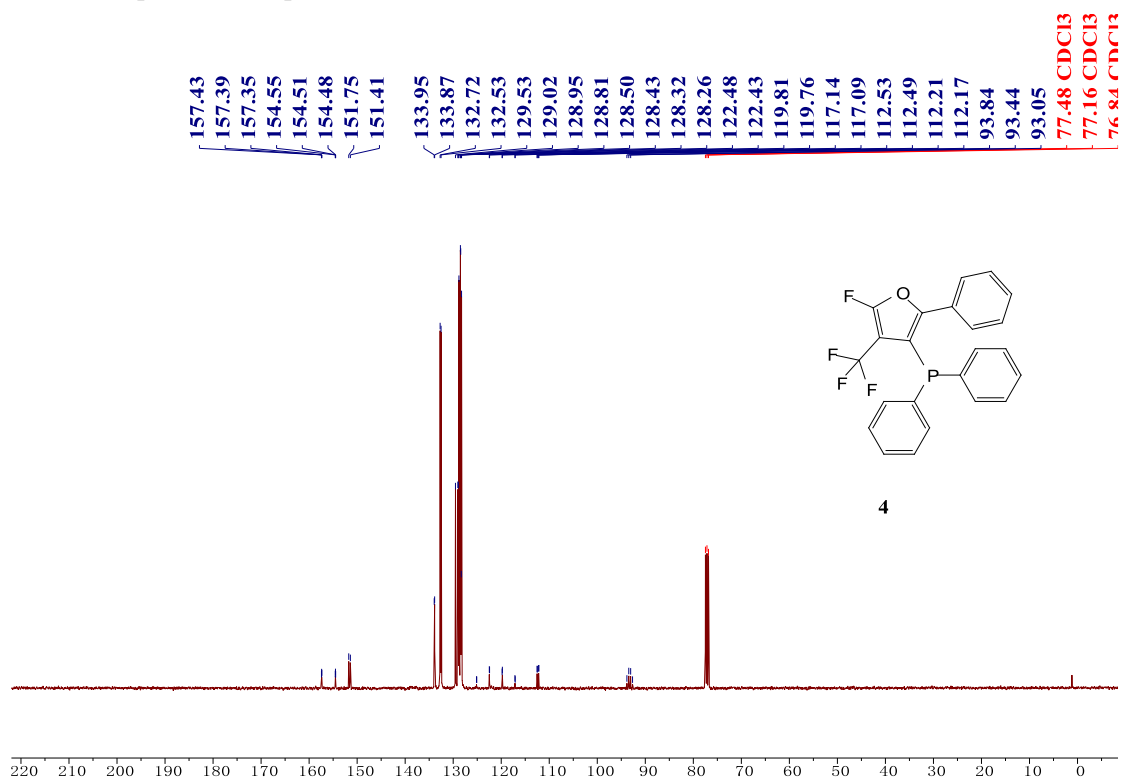



$^1\text{H}$  NMR spectra of the product **5** (400 MHz,  $\text{CDCl}_3$ ):

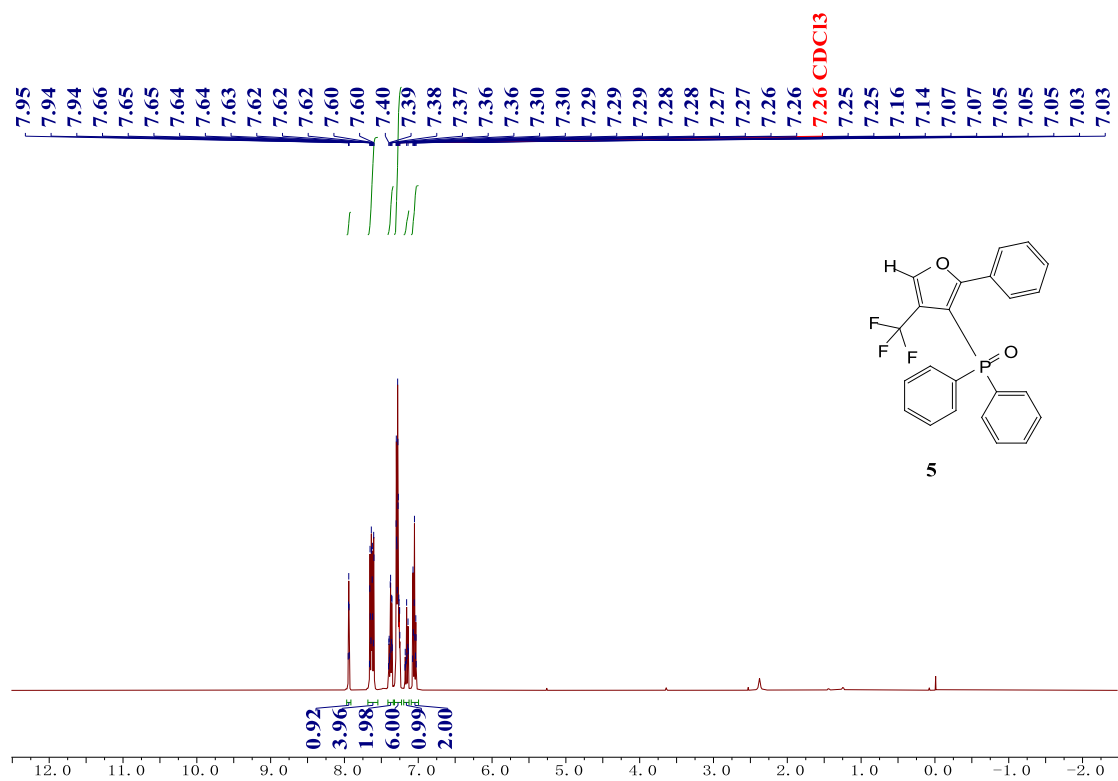

$^{19}\text{F}$  NMR spectra of the product **5** (376 MHz,  $\text{CDCl}_3$ ):

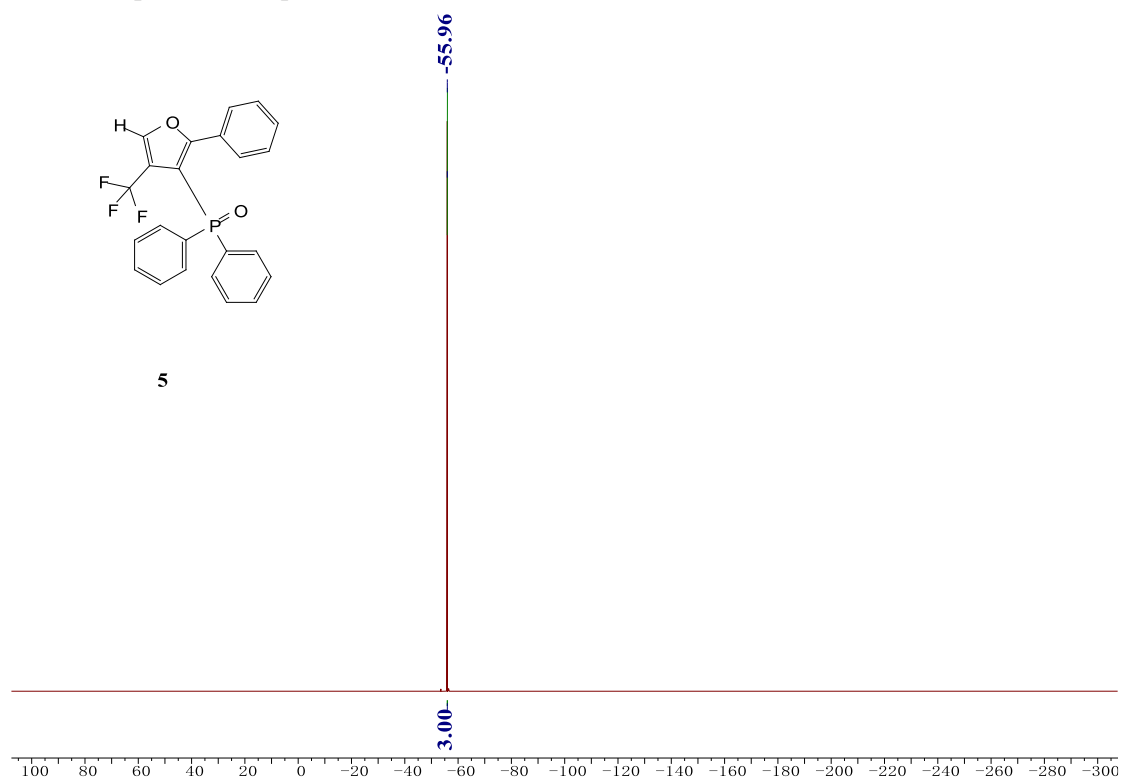

$^{31}\text{P}$  NMR spectra of the product **5** (162 MHz,  $\text{CDCl}_3$ ):

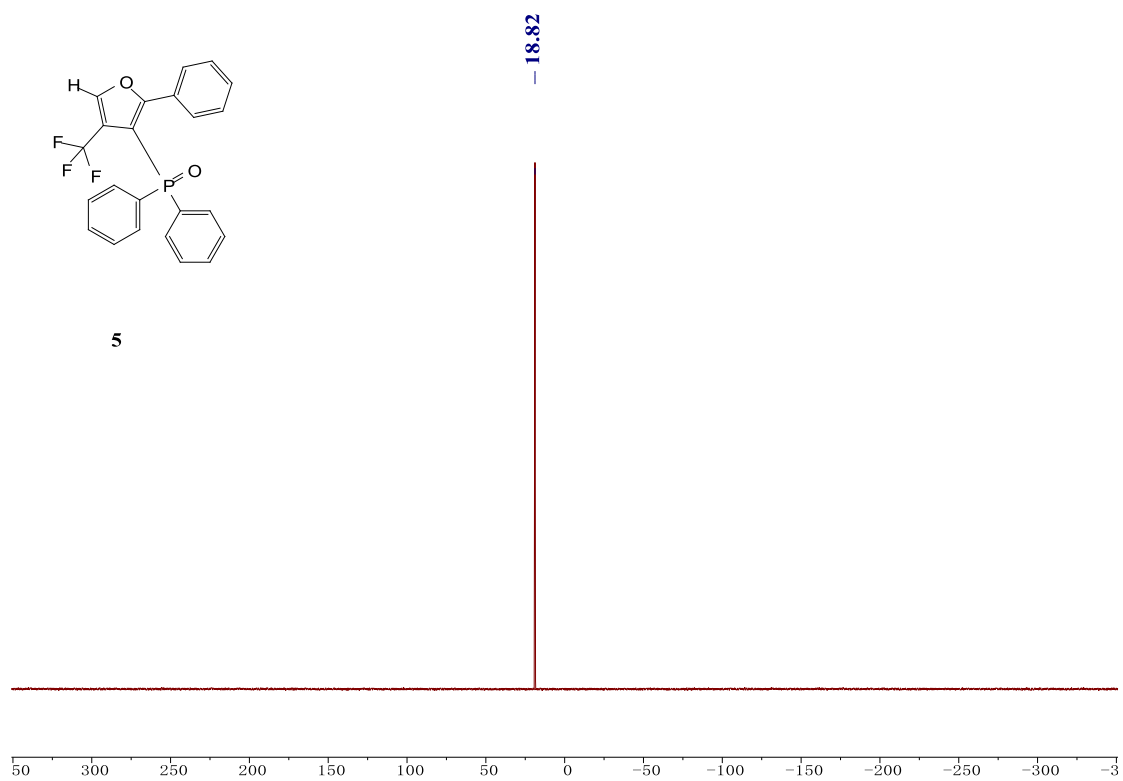

$^{13}\text{C}$  NMR spectra of the product **5** (100 MHz,  $\text{CDCl}_3$ ):

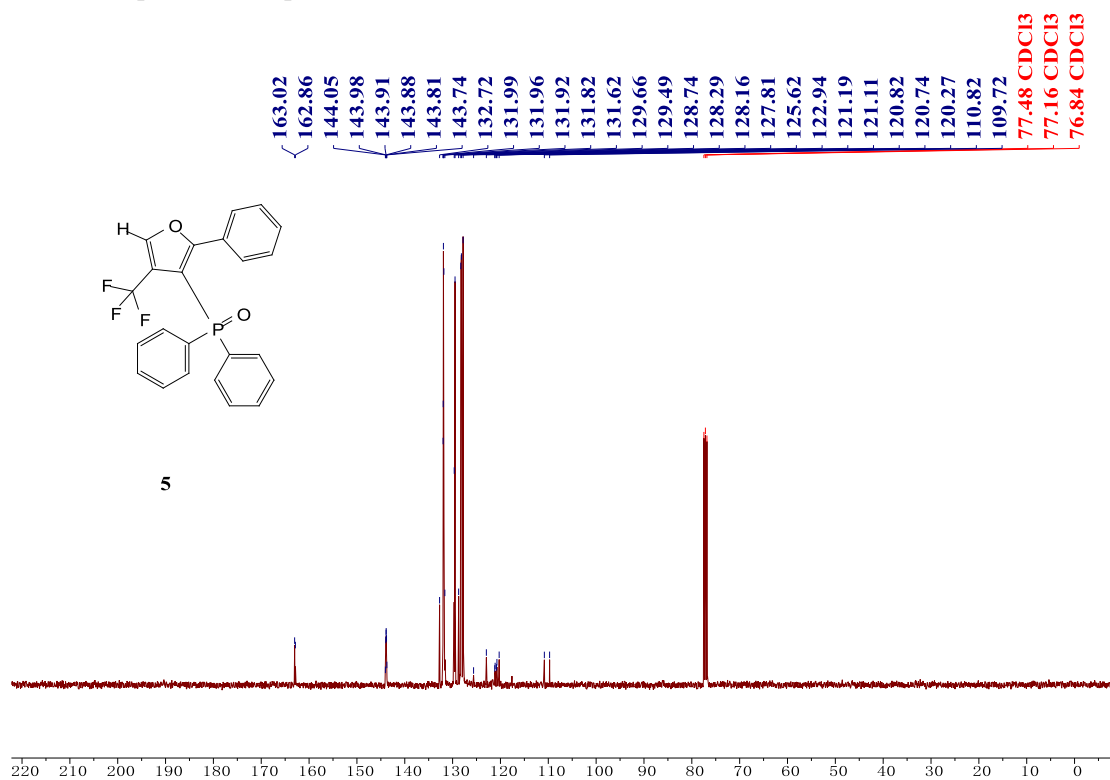

$^1\text{H}$  NMR spectra of the product **6** (400 MHz,  $\text{CDCl}_3$ ):

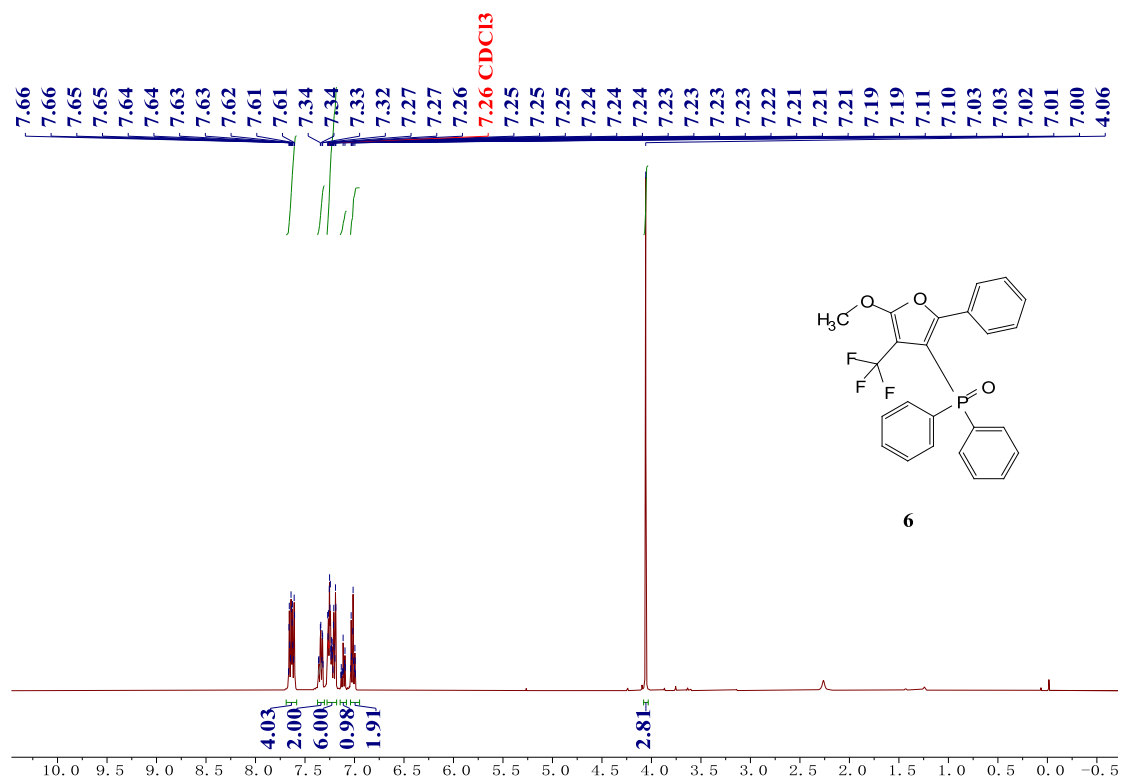

$^{19}\text{F}$  NMR spectra of the product **6** (376 MHz,  $\text{CDCl}_3$ ):

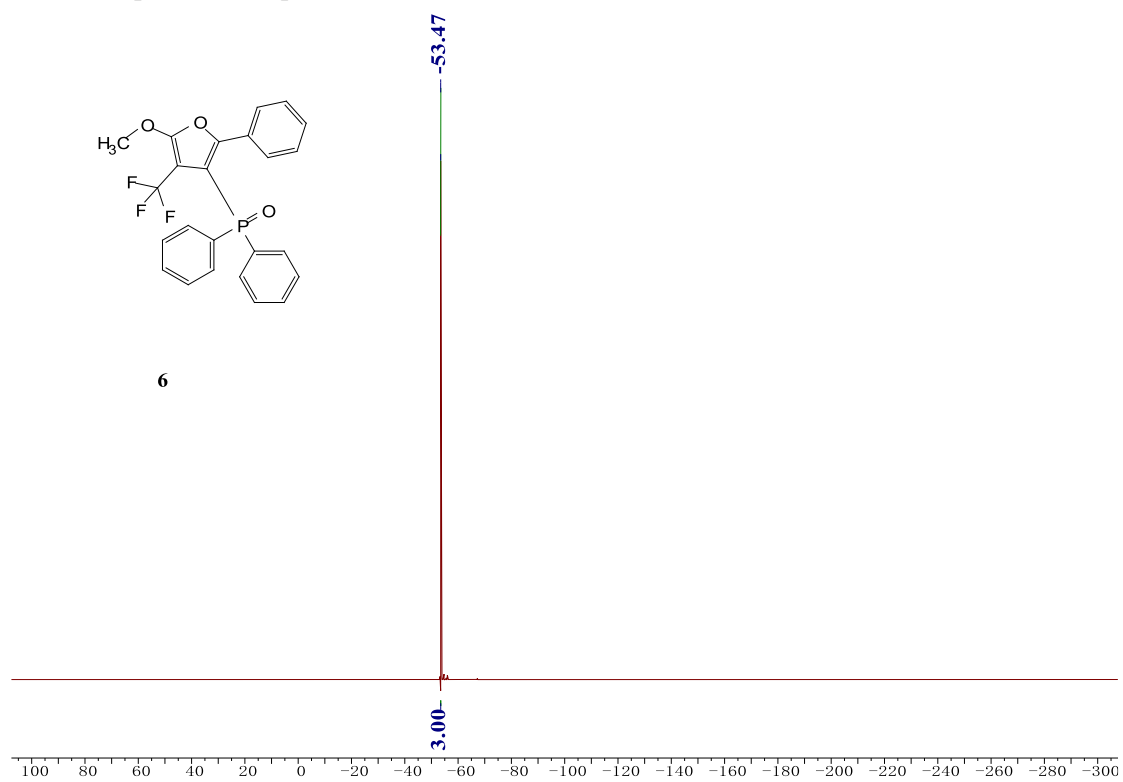

<sup>31</sup>P NMR spectra of the product **6** (162 MHz, CDCl<sub>3</sub>):

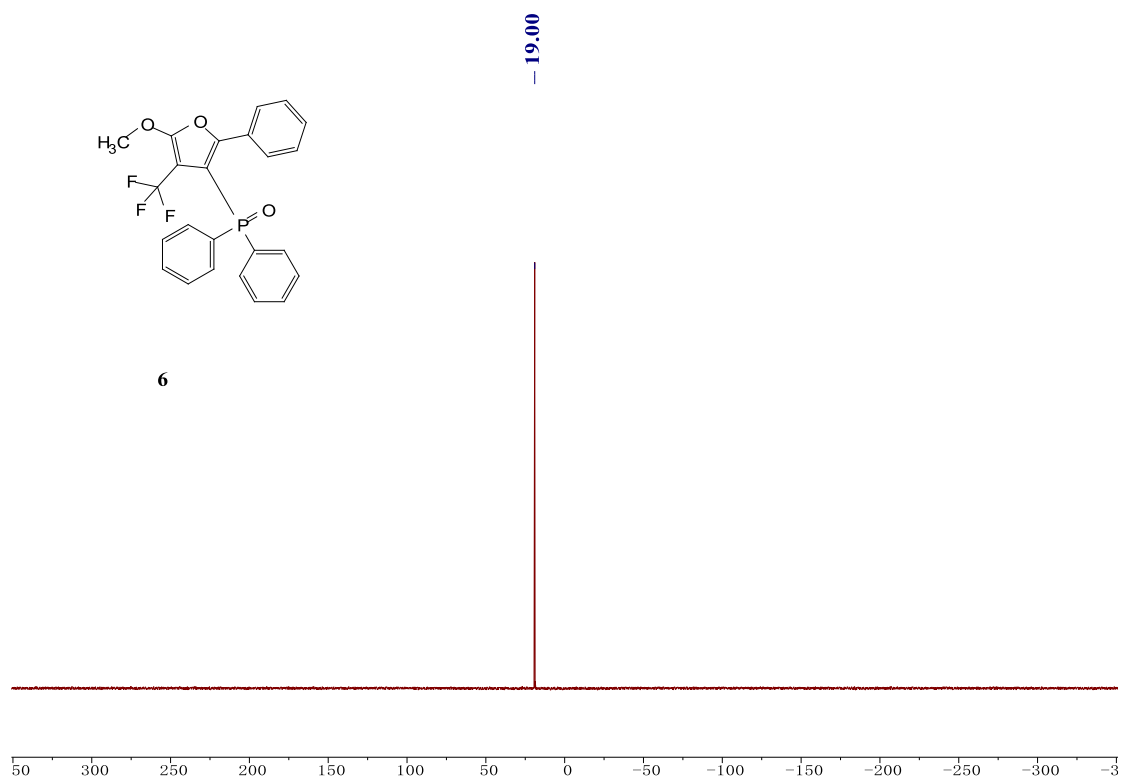

<sup>13</sup>C NMR spectra of the product **6** (100 MHz, CDCl<sub>3</sub>):

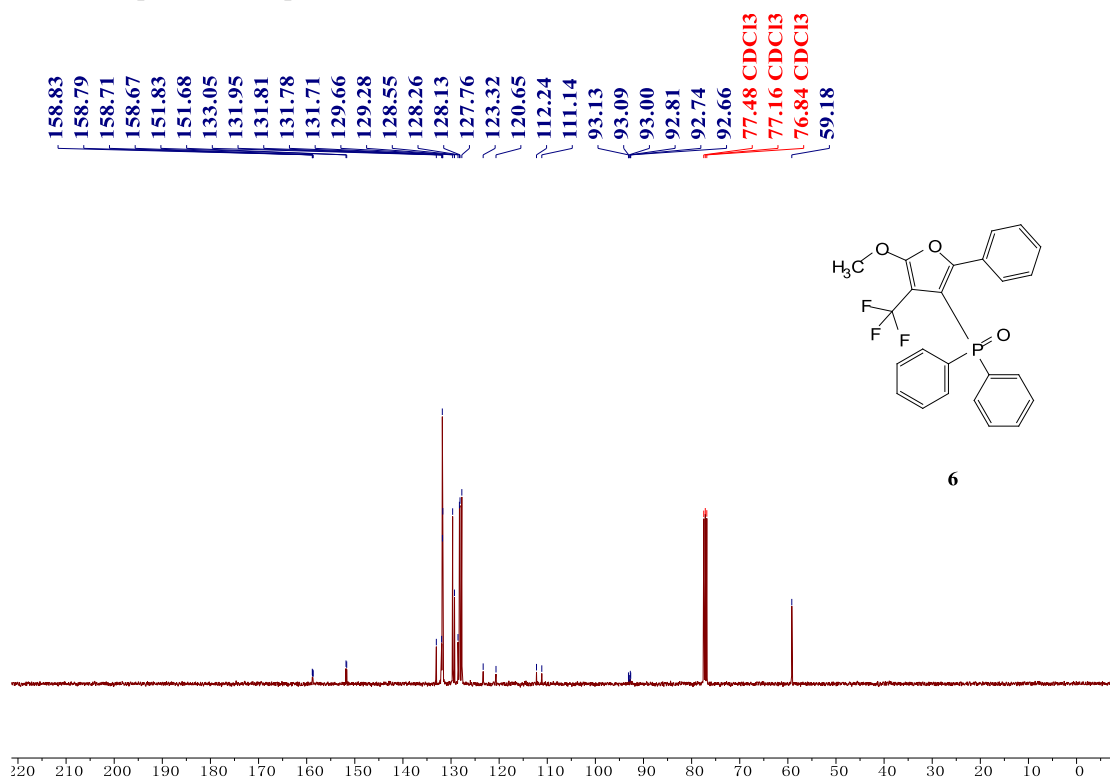

$^1\text{H}$  NMR spectra of the product **7** (400 MHz,  $\text{CDCl}_3$ ):

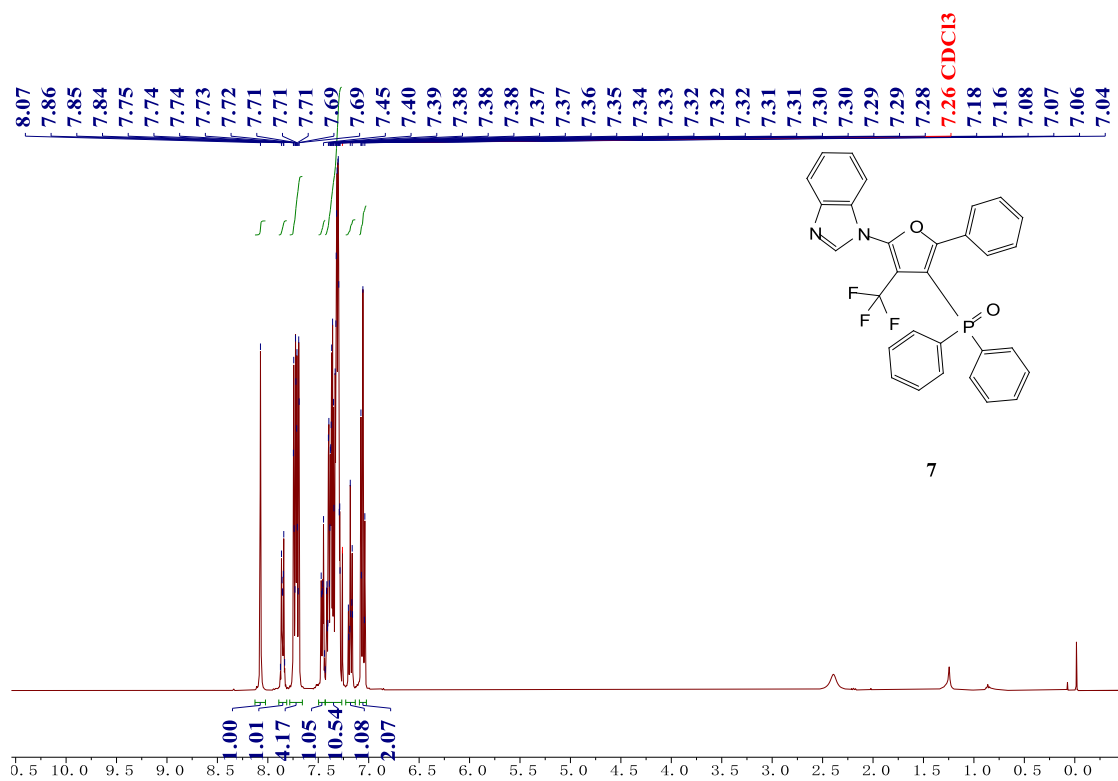

$^{19}\text{F}$  NMR spectra of the product **7** (376 MHz,  $\text{CDCl}_3$ ):

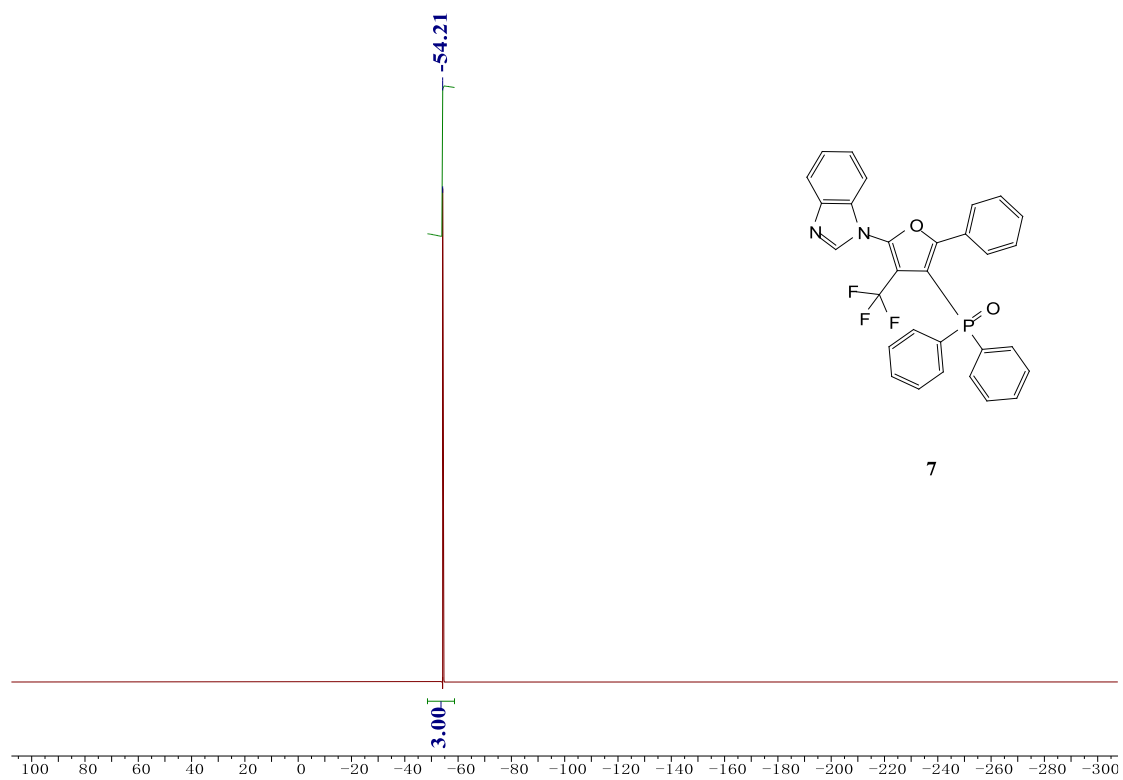

$^{31}\text{P}$  NMR spectra of the product **7** (162 MHz,  $\text{CDCl}_3$ ):

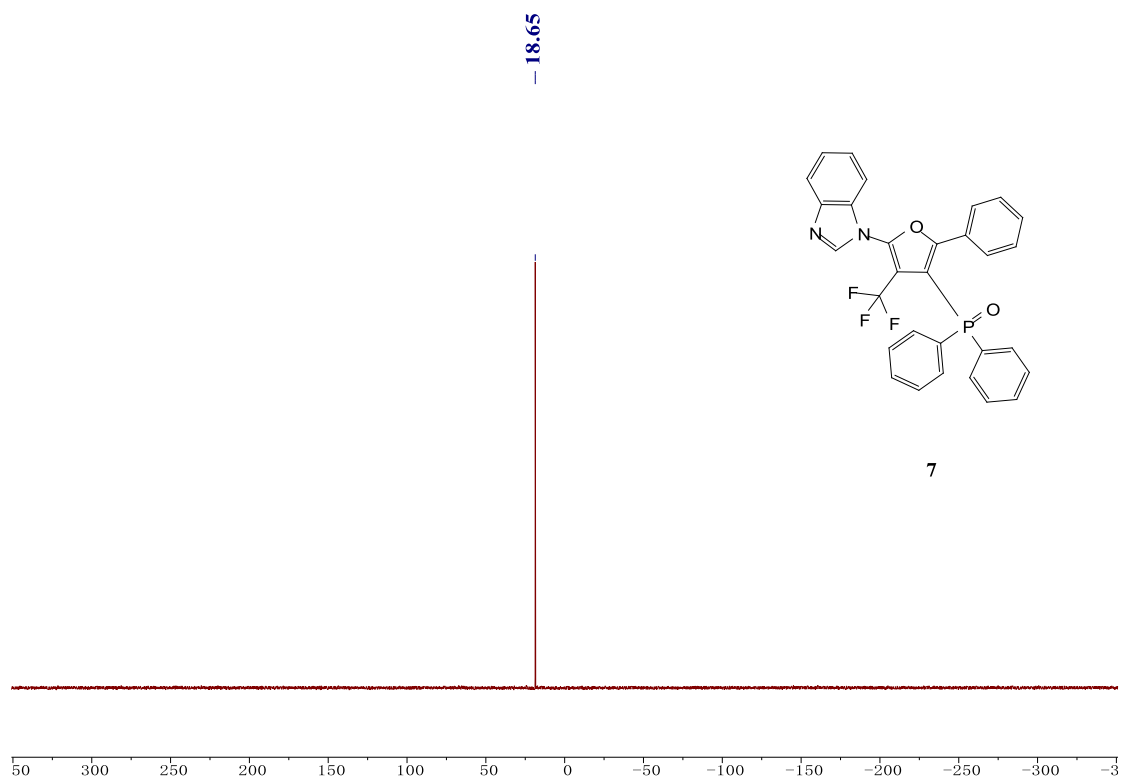

$^{13}\text{C}$  NMR spectra of the product **7** (100 MHz,  $\text{CDCl}_3$ ):

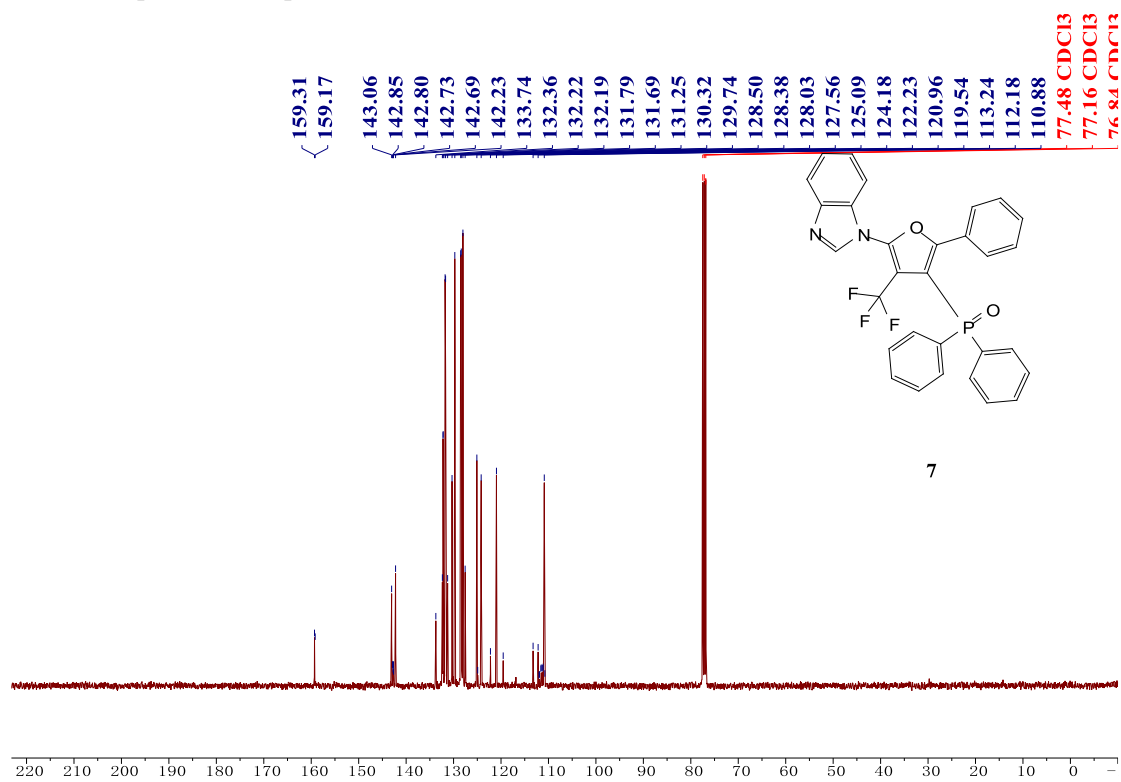

$^1\text{H}$  NMR spectra of the product **8** (400 MHz,  $\text{CDCl}_3$ ):

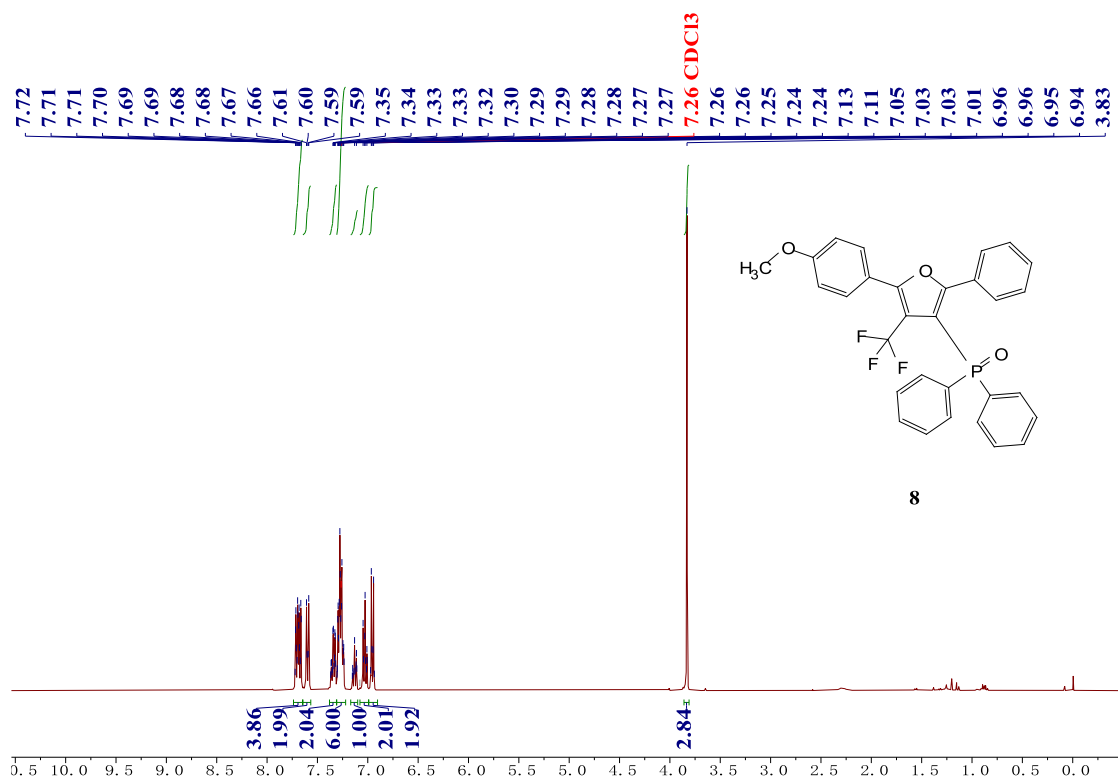

$^{19}\text{F}$  NMR spectra of the product **8** (376 MHz,  $\text{CDCl}_3$ ):

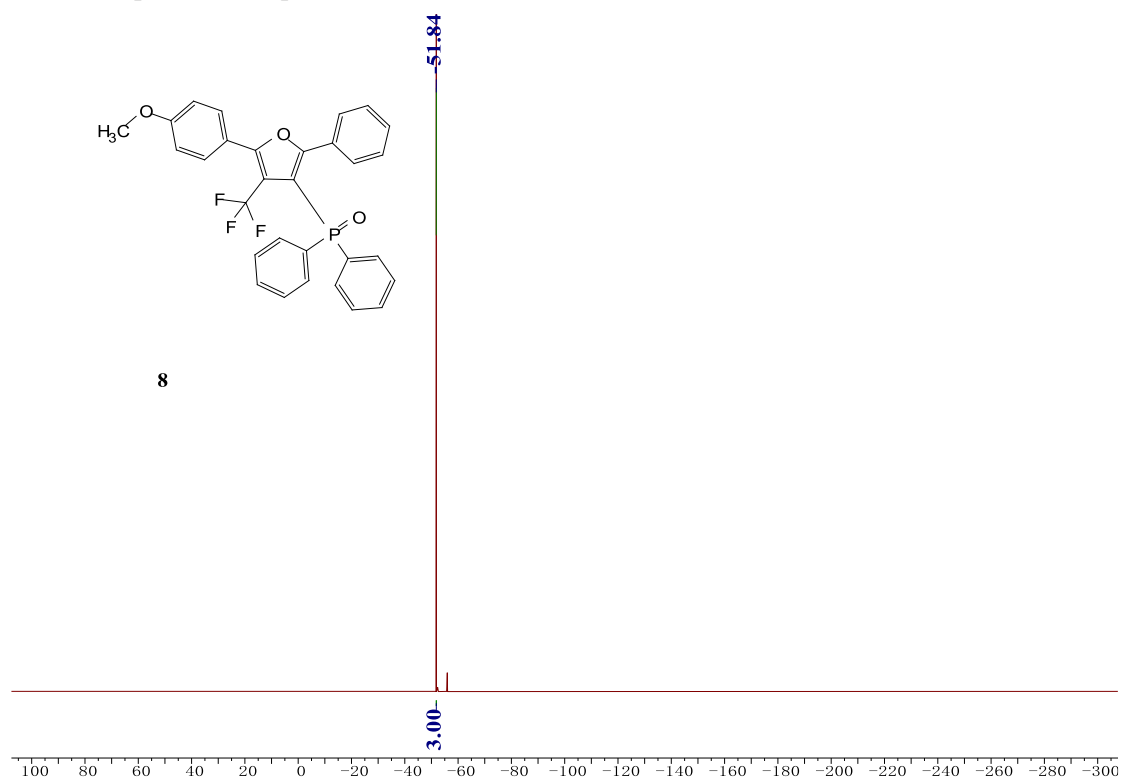

$^{31}\text{P}$  NMR spectra of the product **8** (162 MHz,  $\text{CDCl}_3$ ):

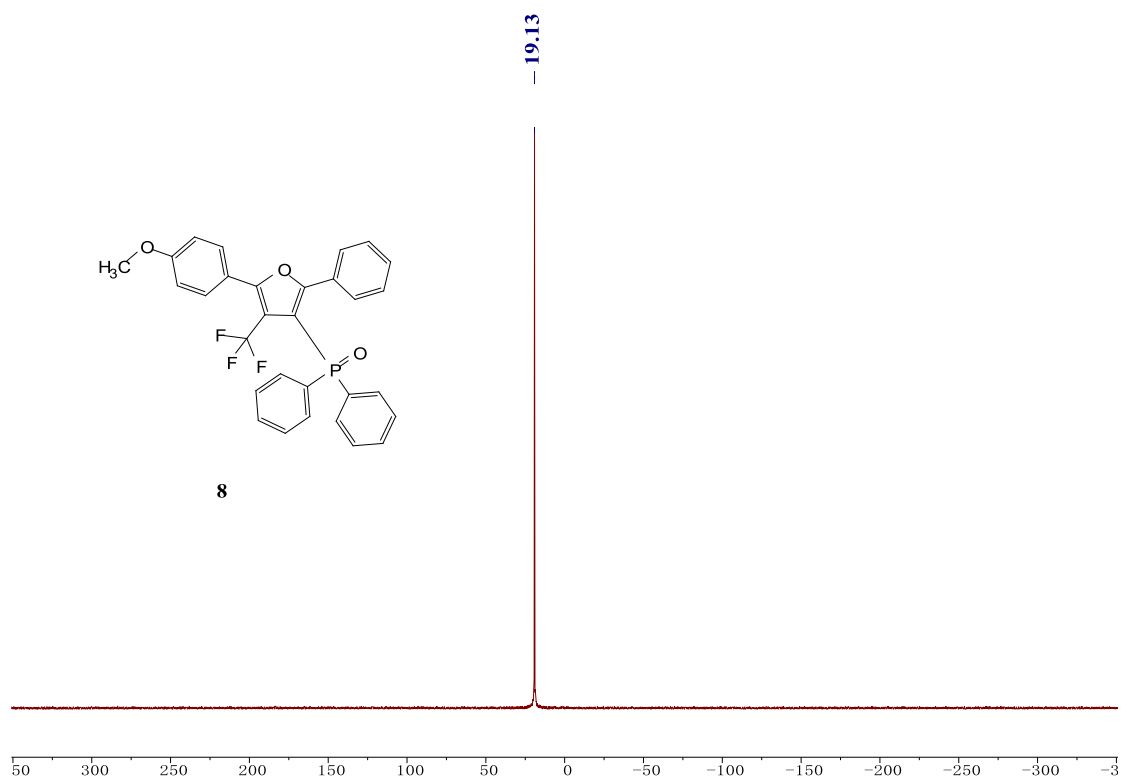

$^{13}\text{C}$  NMR spectra of the product **8** (100 MHz,  $\text{CDCl}_3$ ):

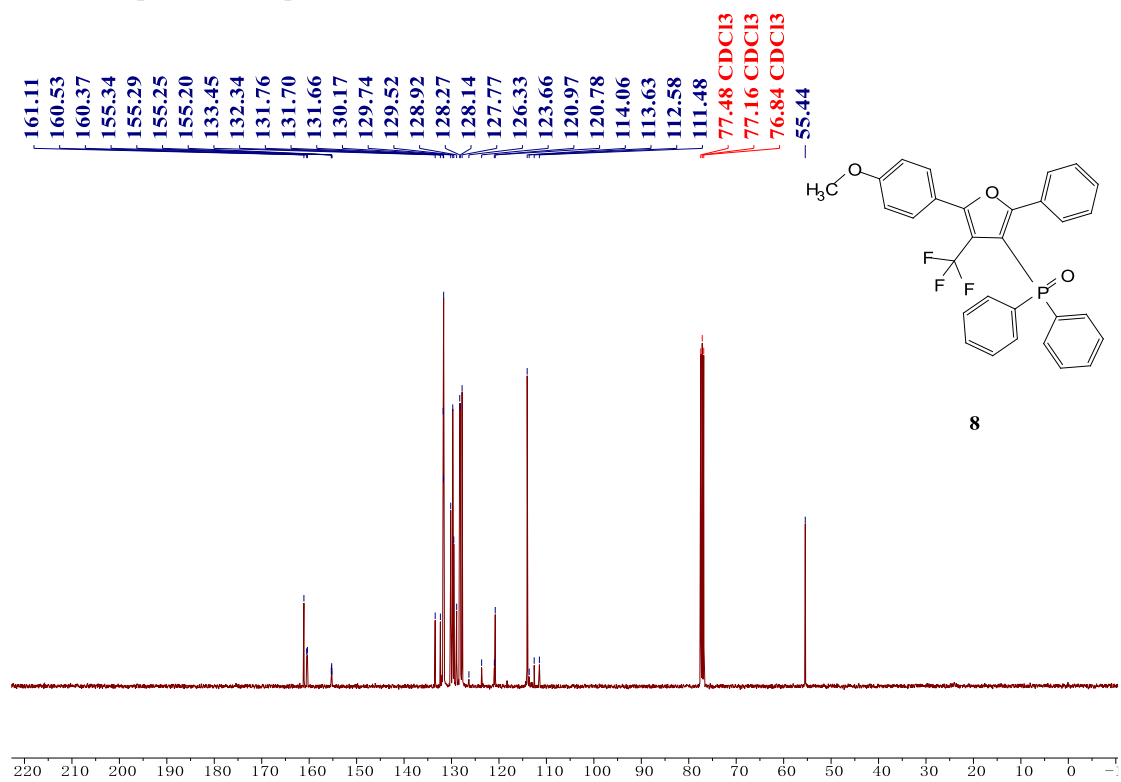



$^1\text{H}$  NMR spectra of the product **10** (400 MHz,  $\text{CDCl}_3$ )

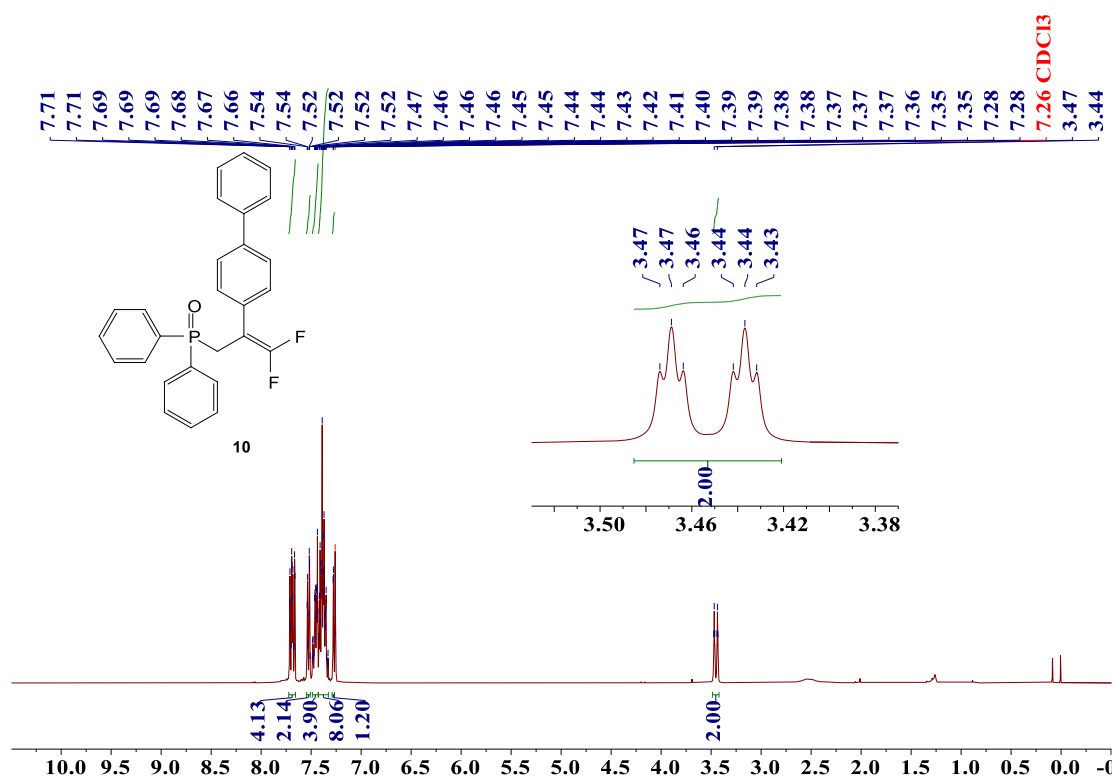

$^{19}\text{F}$  NMR spectra of the product **10** (376 MHz,  $\text{CDCl}_3$ )

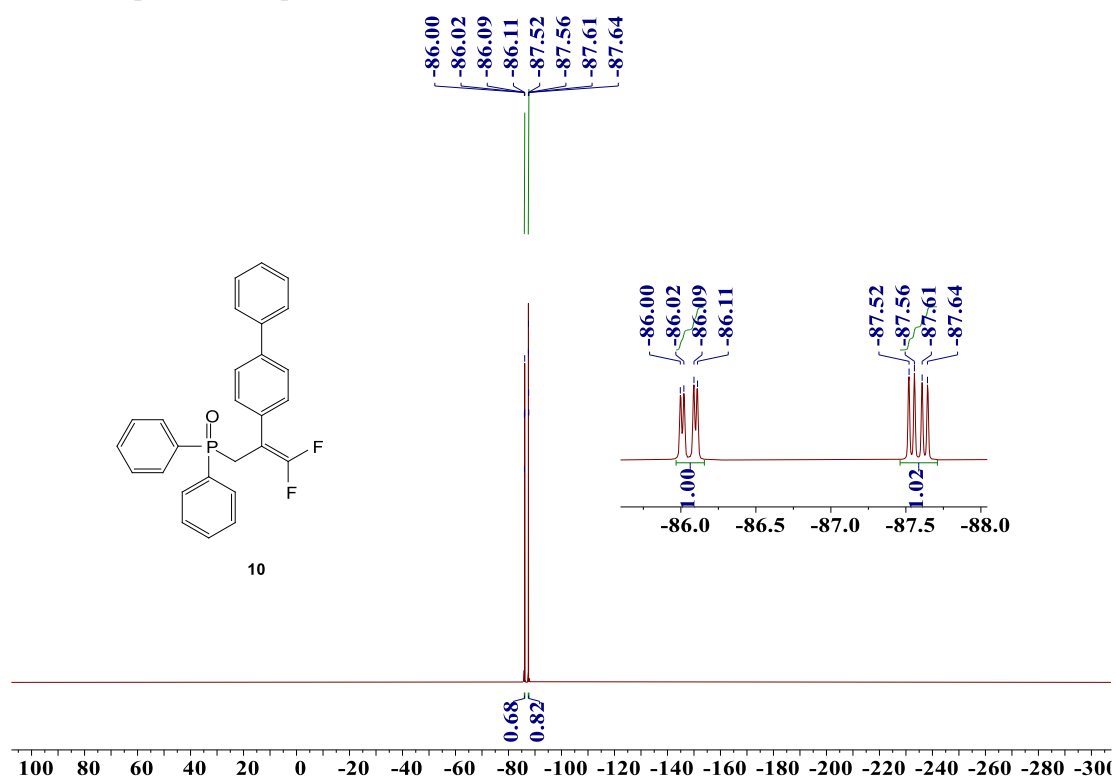

$^{31}\text{P}$  NMR spectra of the product **10** (162 MHz,  $\text{CDCl}_3$ )

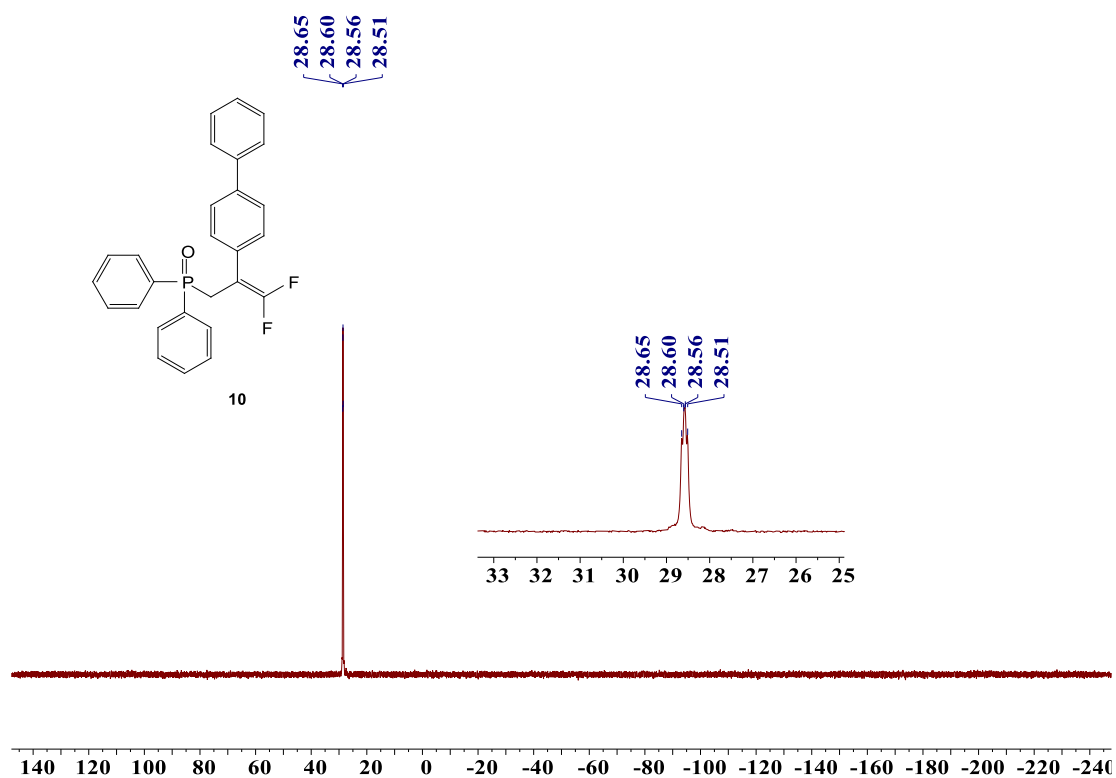

$^{13}\text{C}$  NMR spectra of the product **10** (100 MHz,  $\text{CDCl}_3$ )

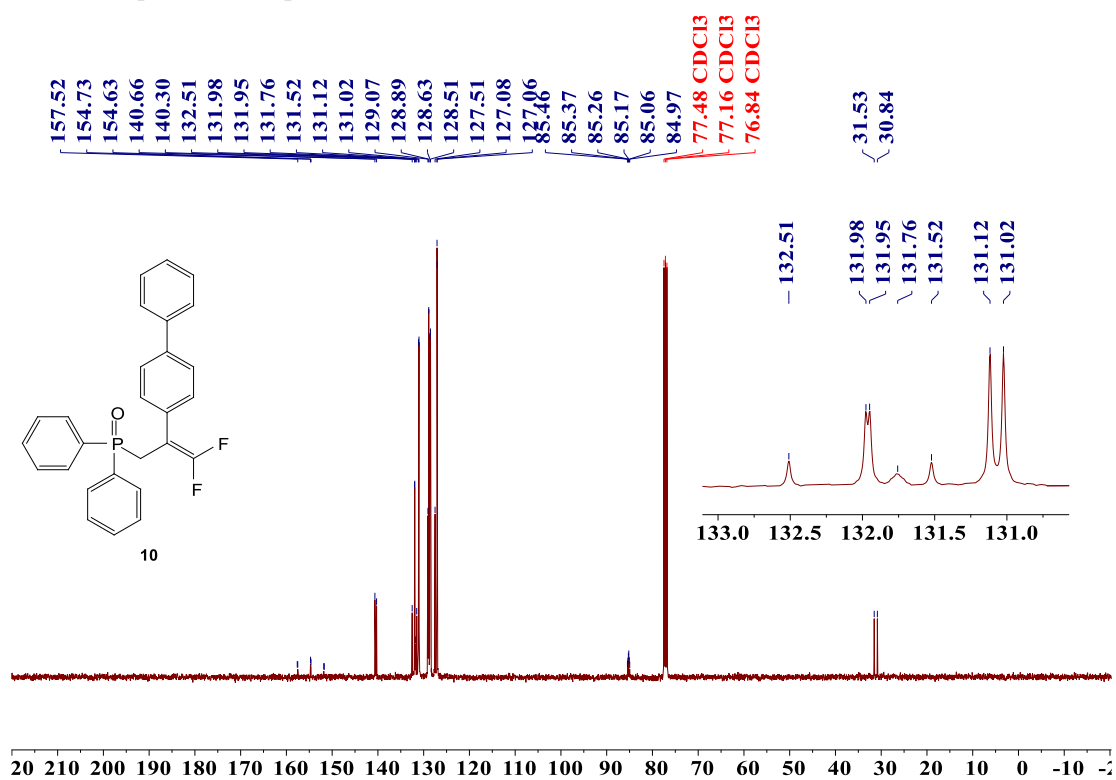

$^1\text{H}$  NMR spectra of the product **14a** (400 MHz,  $\text{CDCl}_3$ )

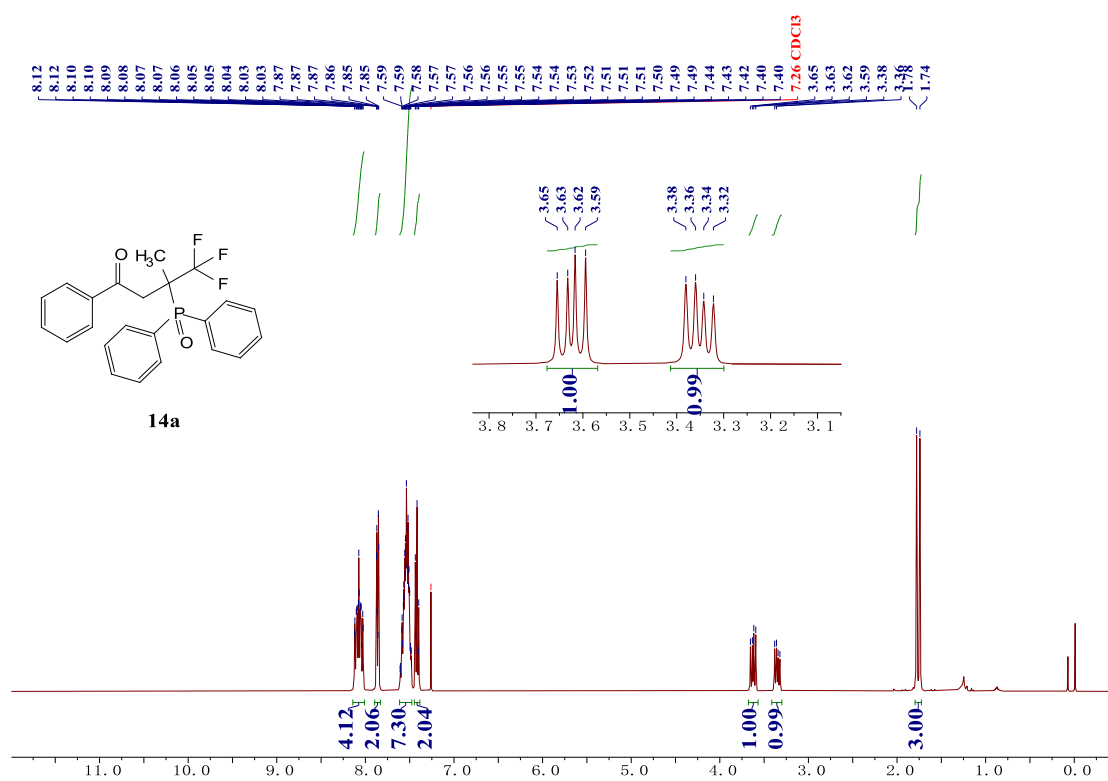

$^{19}\text{F}$  NMR spectra of the product **14a** (376 MHz,  $\text{CDCl}_3$ )

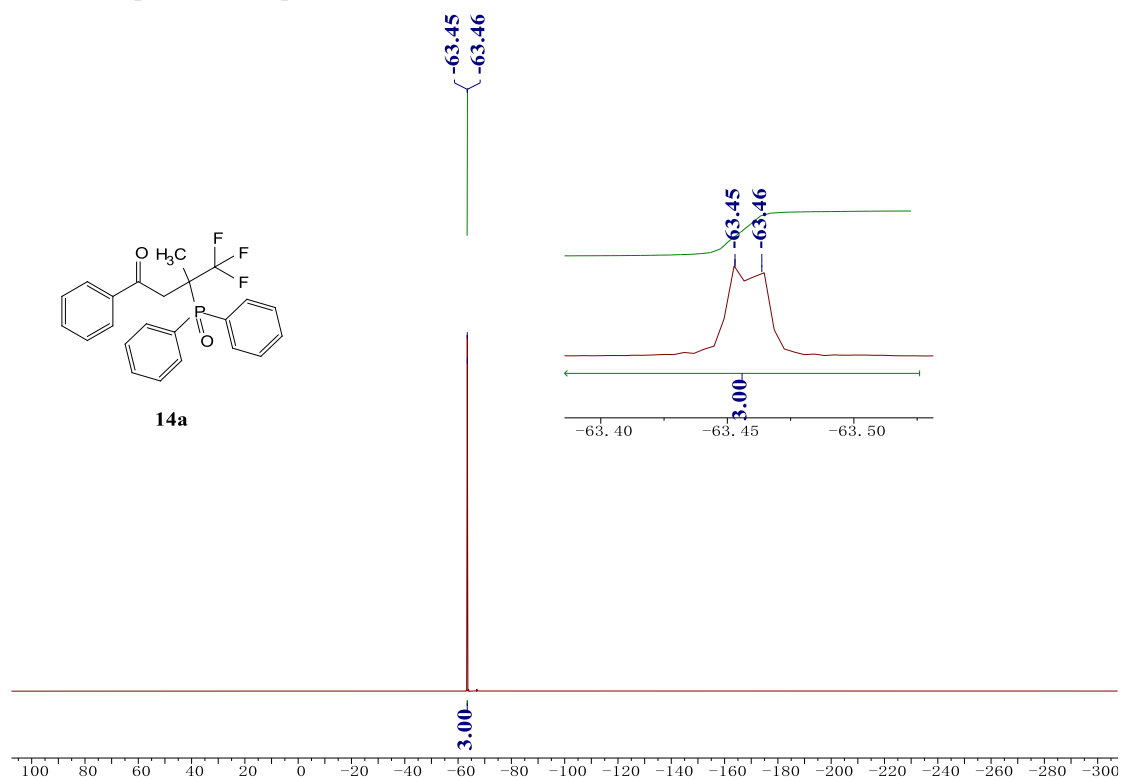

$^{31}\text{P}$  NMR spectra of the product **14a** (162 MHz,  $\text{CDCl}_3$ )

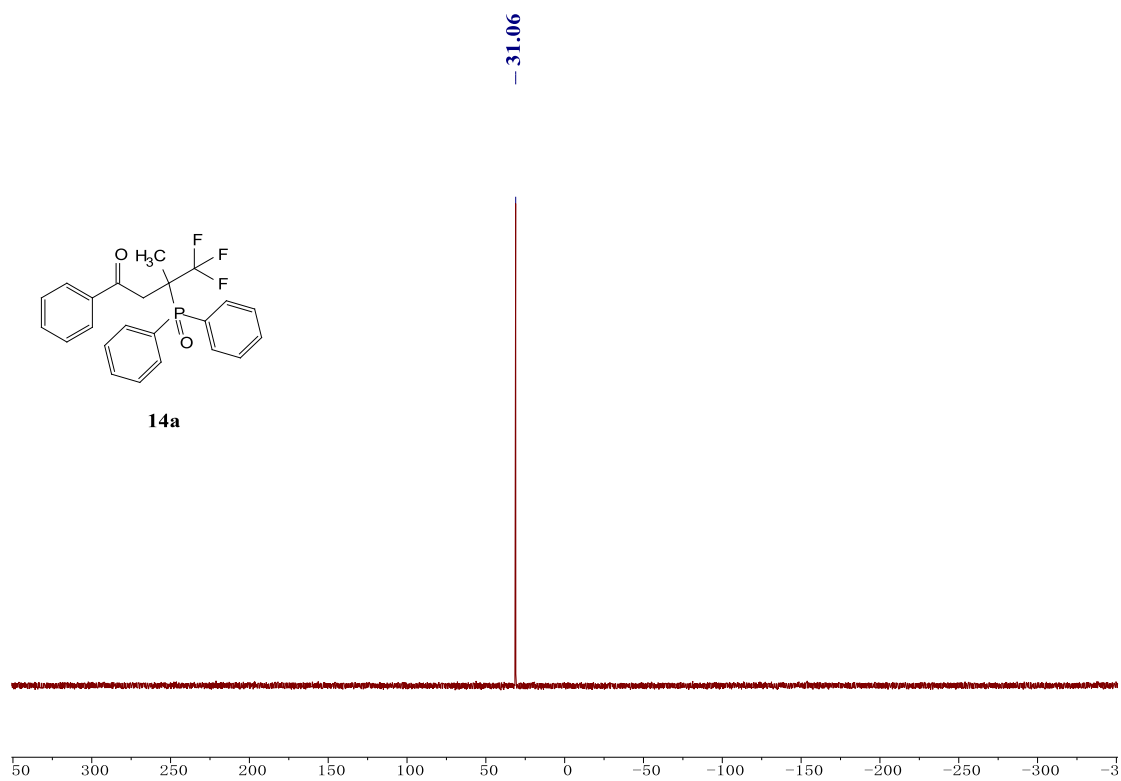

$^{13}\text{C}$  NMR spectra of the product **14a** (100 MHz,  $\text{CDCl}_3$ )

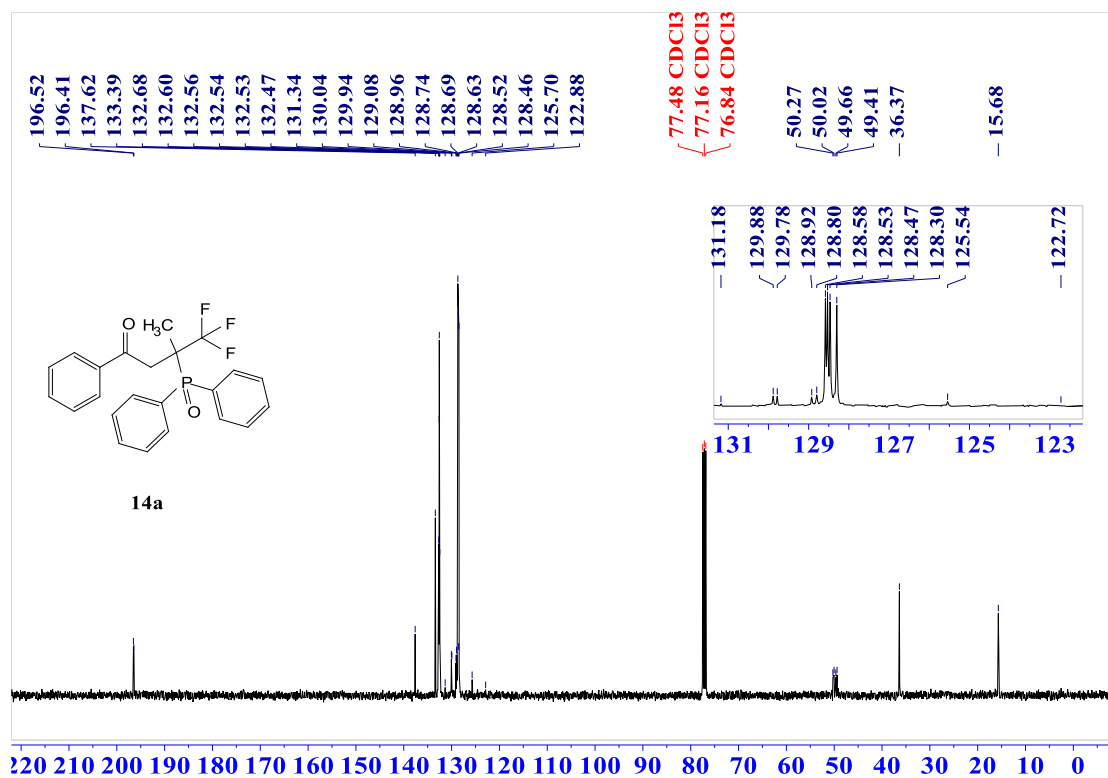

<sup>1</sup>H NMR spectra of the product **14b** (400 MHz, CDCl<sub>3</sub>)

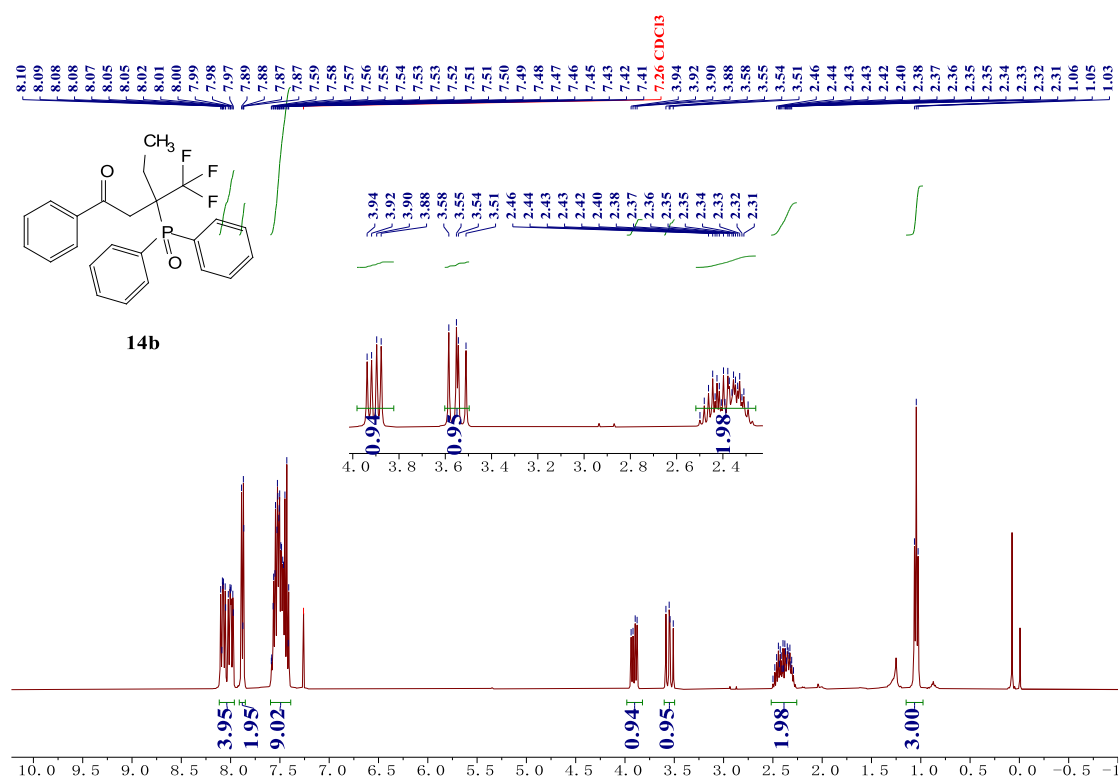

<sup>19</sup>F NMR spectra of the product **14b** (376 MHz, CDCl<sub>3</sub>)

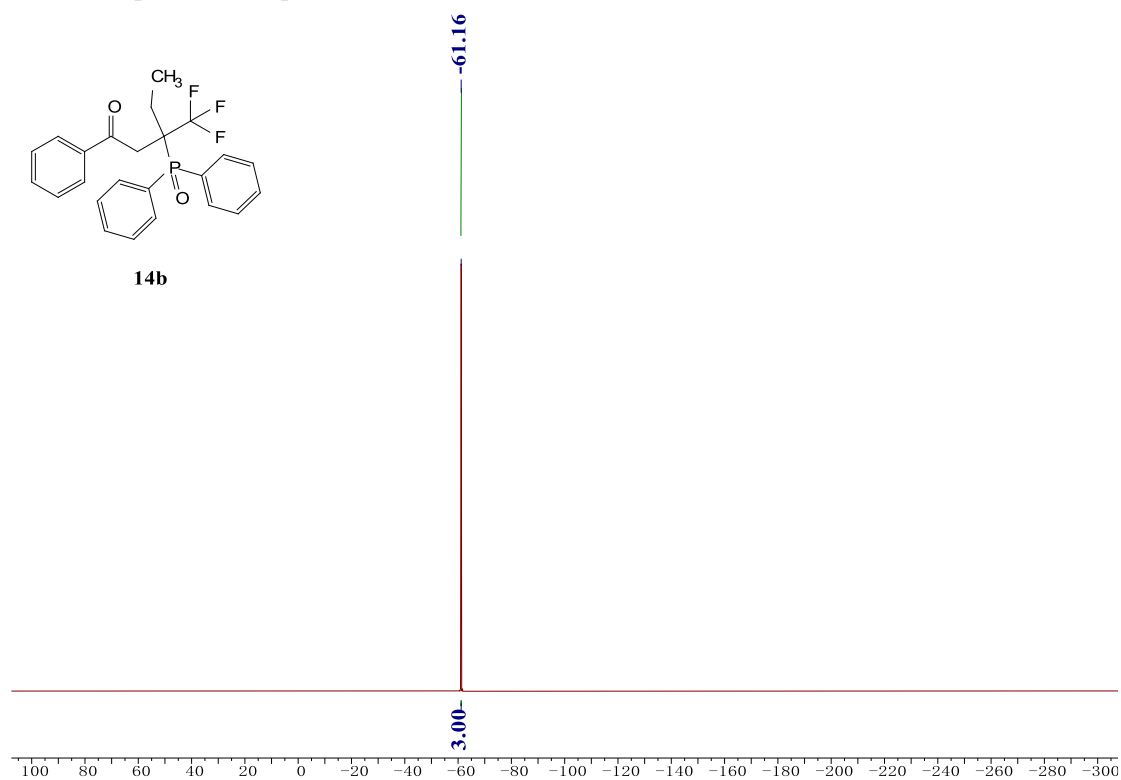

$^{31}\text{P}$  NMR spectra of the product **14b** (162 MHz,  $\text{CDCl}_3$ )

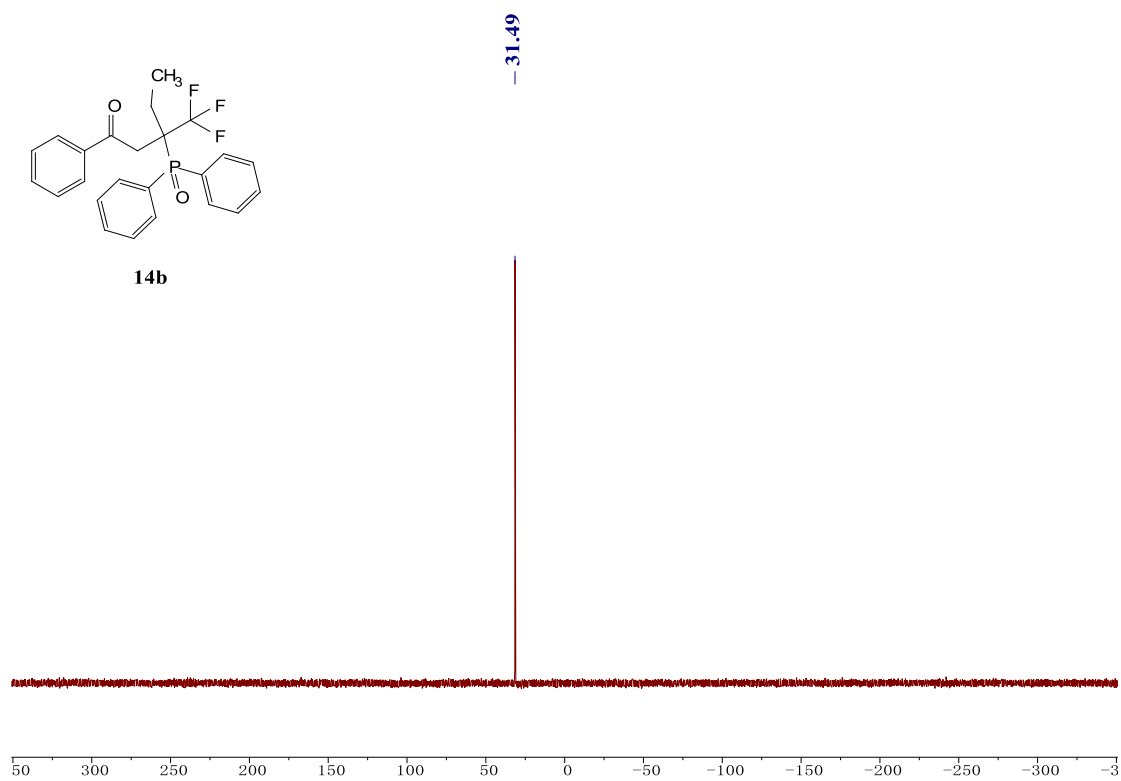

$^{13}\text{C}$  NMR spectra of the product **14b** (100 MHz,  $\text{CDCl}_3$ )

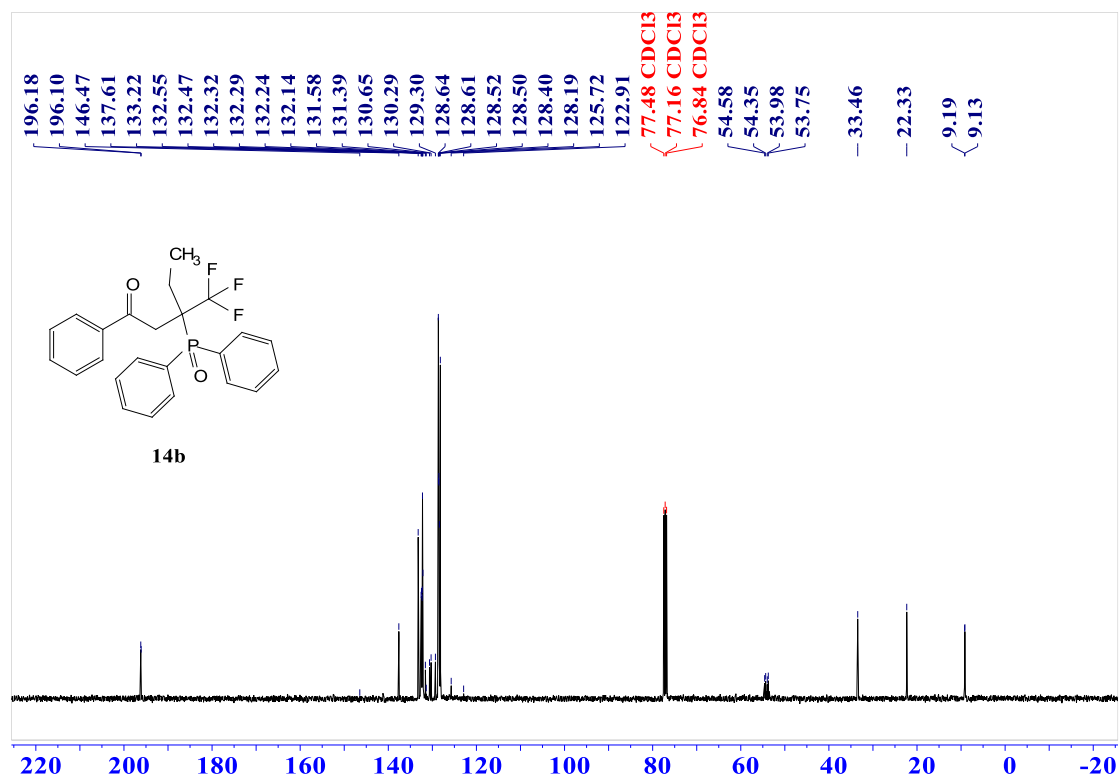



$^{31}\text{P}$  NMR spectra of the product **14d** (162 MHz,  $\text{CDCl}_3$ )

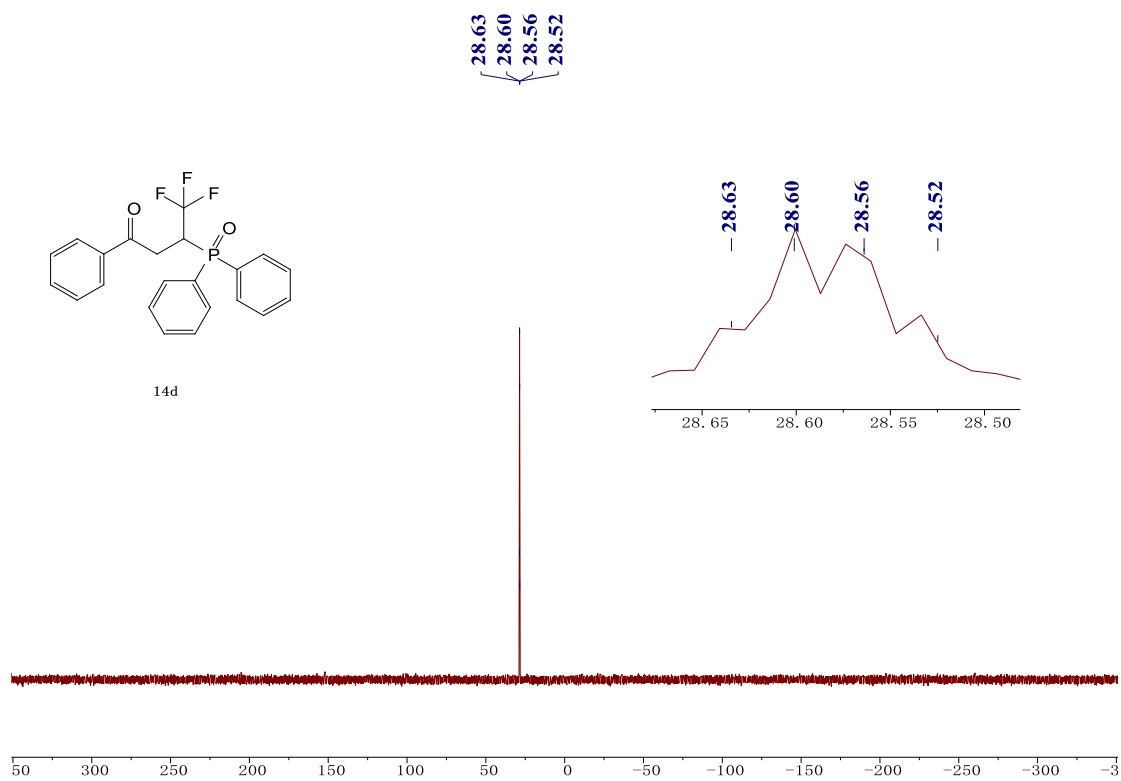

$^{13}\text{C}$  NMR spectra of the product **14d** (100 MHz,  $\text{CDCl}_3$ )

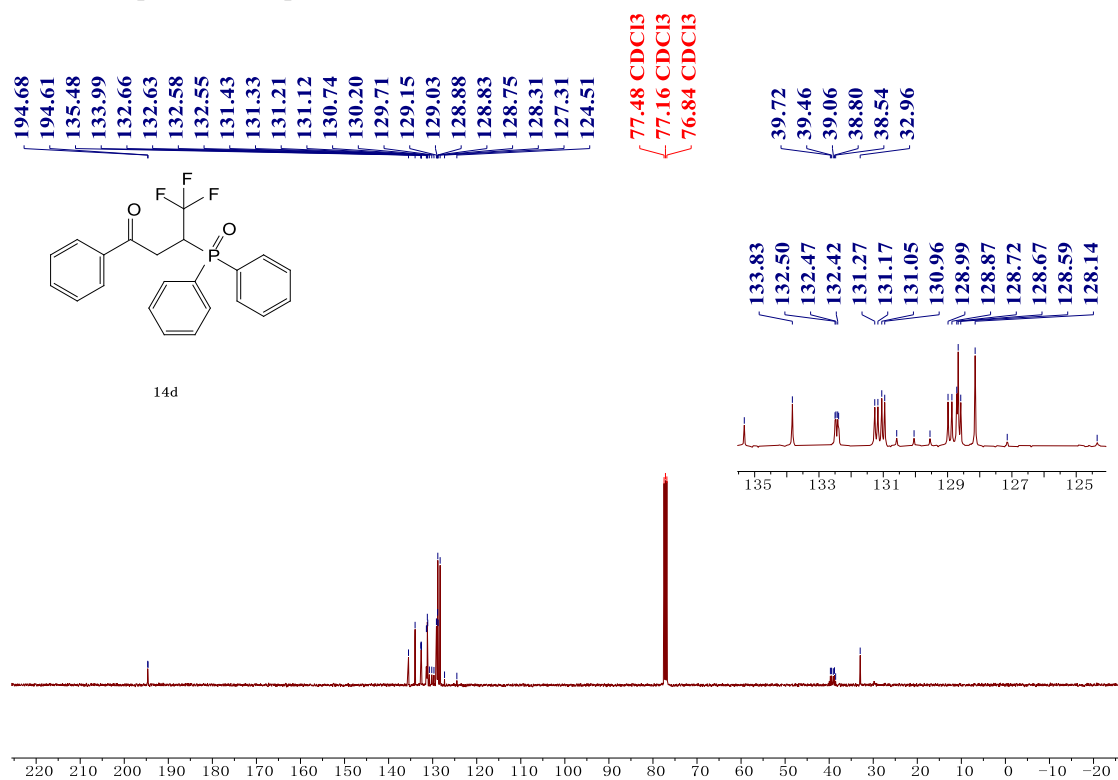



$^1\text{H}$  NMR spectra of the product **15c** (400 MHz,  $\text{CDCl}_3$ )

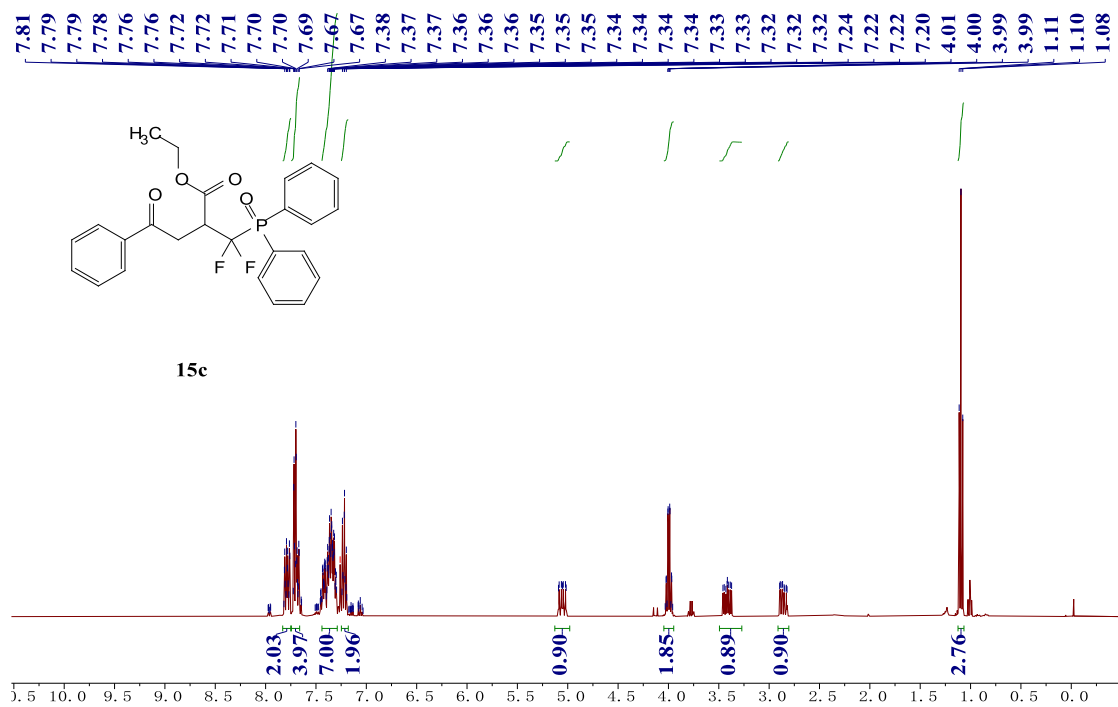

$^{19}\text{F}$  NMR spectra of the product **15c** 376 MHz,  $\text{CDCl}_3$ )

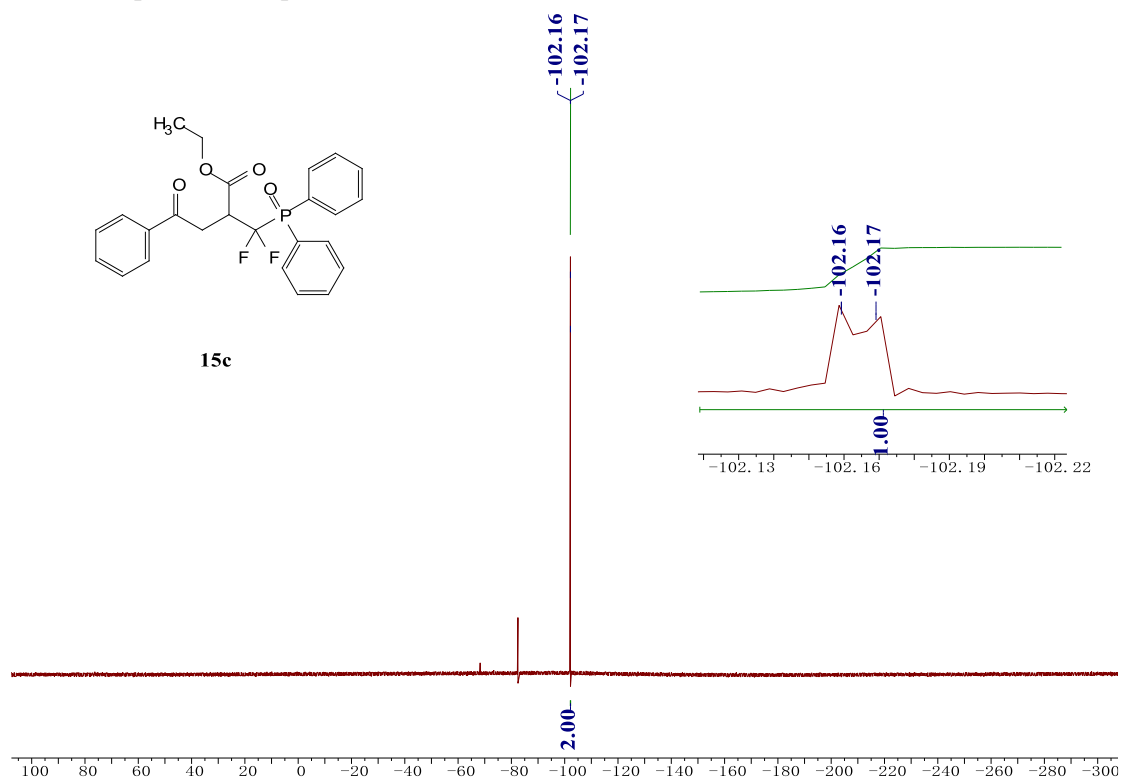

$^{31}\text{P}$  NMR spectra of the product **15c** (162 MHz,  $\text{CDCl}_3$ )

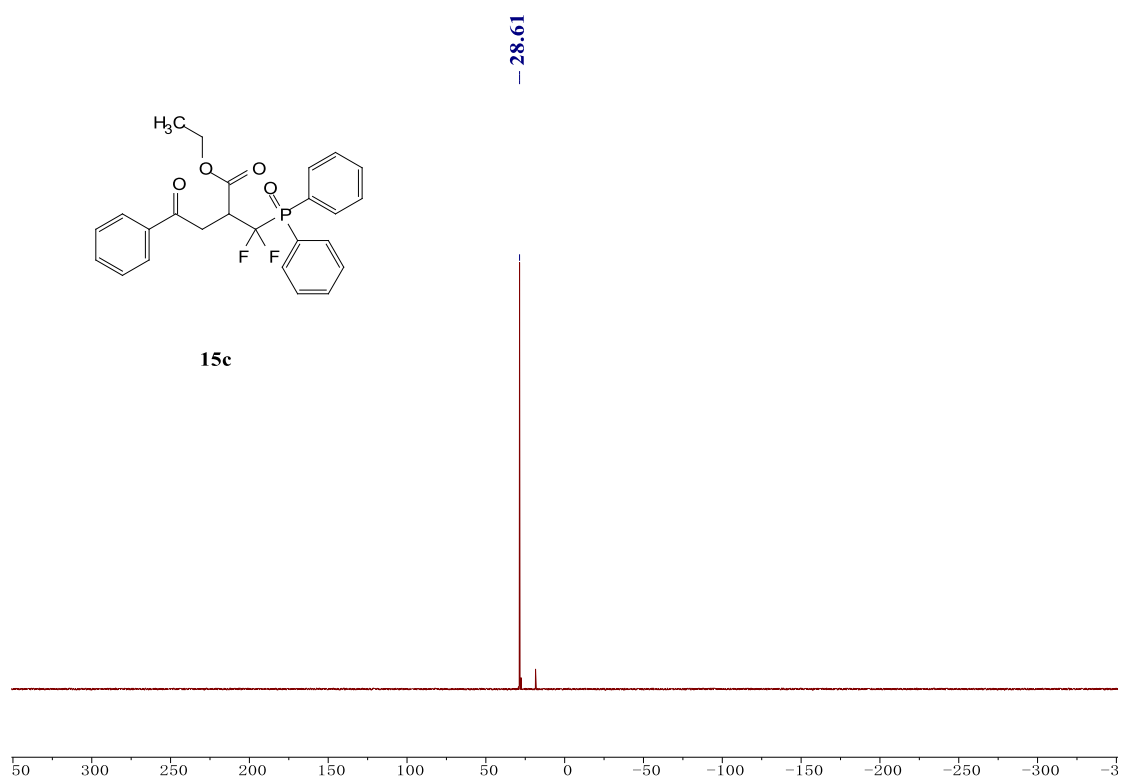

$^{13}\text{C}$  NMR spectra of the product **15c** (100 MHz,  $\text{CDCl}_3$ )

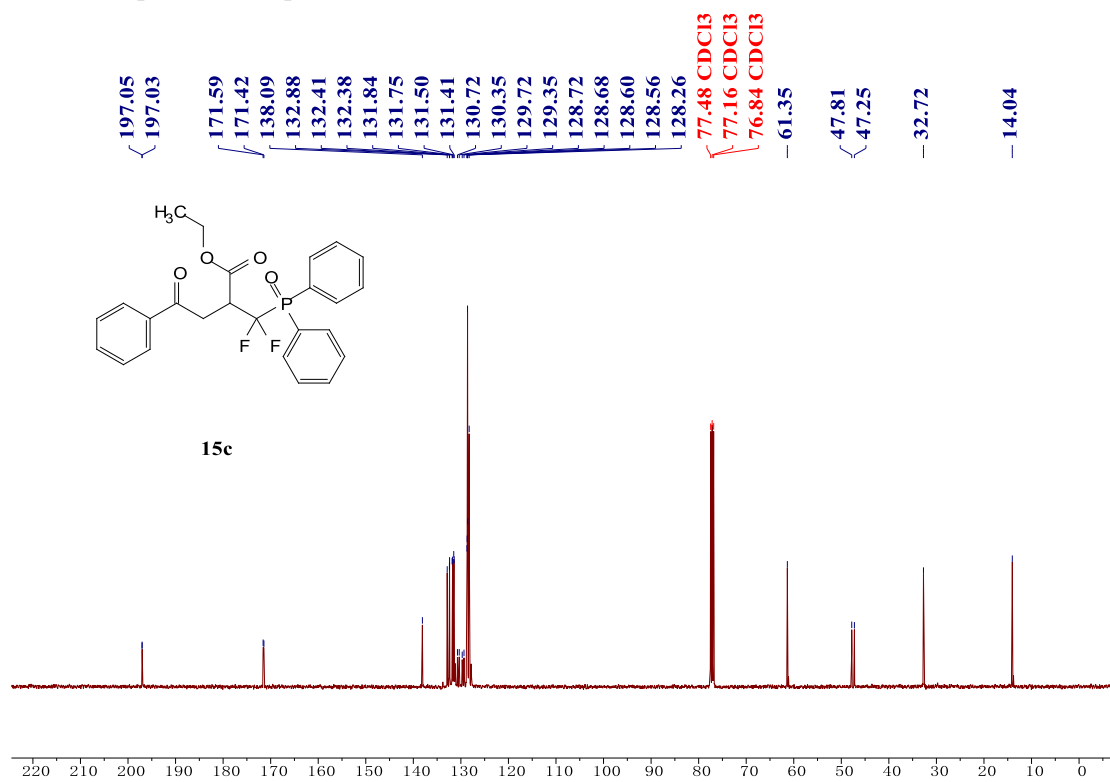

Supplement: d4qo00659c1.pdf [file d4qo00659c1.pdf]
